# Supplementary material for: A comprehensive landscape of human organ N-glycoproteome
Source: Research Square preprint supplement (doi:10.21203/rs.3.rs-5869453/v1), 2025-01-28
Supplement: Supplementary file 1 [file 7724129ea8f7fa172183046b.xlsx]

## Sheet: Contents
Contents
Supplementary Table S1	Bioinformatics analysis of different fucose and sialic acid compositions
Supplementary Table S2	Bioinformatics analysis of Cluster 3 and Cluster 4.
Supplementary Table S3	Search results of gPeptide.
Supplementary Table S4	Search results of Glyco-Decipher.
Supplementary Table S5	Search results of pGlyco3.
Supplementary Table S6	Search results of Fragpipe.

## Sheet: Supplementary Table S1
Bioinformatics analysis of different FS_comp.
KEGG analysis
FS_comp	Category	Term	Count	%	PValue	Genes	List Total	Pop Hits	Pop Total	Fold Enrichment	Bonferroni	Benjamini	FDR
FxSy	KEGG_PATHWAY	hsa04512:ECM-receptor interaction	11	15.0685	2.43557e-11	P04004, P24043, P05556, P12110, P12109, P24821, P98160, P12111, P07996, P11047, P02751	48	89	8840	22.7622	2.04588e-09	2.04588e-09	1.9241e-09
FxSy	KEGG_PATHWAY	hsa04610:Complement and coagulation cascades	10	13.6986	6.32838e-10	P04004, P08603, P36980, P00734, P01009, P01008, P02745, P02679, P02675, P10909	48	88	8840	20.928	5.31584e-08	2.65792e-08	2.49971e-08
FxSy	KEGG_PATHWAY	hsa04820:Cytoskeleton in muscle cells	11	15.0685	2.82143e-07	P24043, P05556, P12110, P21810, P12109, P35555, P07585, P98160, P12111, P07996, P02751	48	232	8840	8.73204	2.36997e-05	7.9e-06	7.42976e-06
FxSy	KEGG_PATHWAY	hsa04510:Focal adhesion	10	13.6986	9.51809e-07	P04004, P24043, P05556, P12110, P12109, P24821, P12111, P07996, P11047, P02751	48	203	8840	9.07225	7.99488e-05	1.9988e-05	1.87982e-05
FxSy	KEGG_PATHWAY	hsa05165:Human papillomavirus infection	10	13.6986	5.26465e-05	P04004, P24043, P05556, P12110, P12109, P24821, P12111, P07996, P11047, P02751	48	333	8840	5.53053	0.00441266	0.000884461	0.000831814
FxSy	KEGG_PATHWAY	hsa05205:Proteoglycans in cancer	8	10.9589	9.03405e-05	P04004, P05556, P07585, P98160, P51884, P07996, P02751, P08962	48	204	8840	7.22222	0.00756022	0.00120479	0.00113308
FxSy	KEGG_PATHWAY	hsa04151:PI3K-Akt signaling pathway	10	13.6986	0.000100399	P04004, P24043, P05556, P12110, P12109, P24821, P12111, P07996, P11047, P02751	48	362	8840	5.08748	0.00839849	0.00120479	0.00113308
FxSy	KEGG_PATHWAY	hsa04145:Phagosome	7	9.58904	0.000167772	P13473, P05556, P20645, P11279, P22897, Q9UBG0, P07996	48	157	8840	8.21125	0.0139952	0.0017616	0.00165675
FxSy	KEGG_PATHWAY	hsa04142:Lysosome	6	8.21918	0.000638265	P13473, P07602, P20645, O14773, P11279, P08962	48	132	8840	8.37121	0.0522186	0.00595714	0.00560255
FxS0	KEGG_PATHWAY	hsa04512:ECM-receptor interaction	9	11.8421	5.58667e-09	P04004, P24043, P12110, P12109, P24821, P98160, P12111, P11047, P02751	42	89	8840	21.2841	4.3576e-07	4.3576e-07	4.07827e-07
FxS0	KEGG_PATHWAY	hsa04142:Lysosome	9	11.8421	1.26138e-07	P13473, P07602, P07339, P20645, O14773, P11279, P11117, P50897, P53634	42	132	8840	14.3506	9.83868e-06	4.91936e-06	4.60402e-06
FxS0	KEGG_PATHWAY	hsa04820:Cytoskeleton in muscle cells	10	13.1579	8.52272e-07	P24043, P12110, P21810, P12109, P35555, P07585, P98160, P12111, P02751, Q86VF7	42	232	8840	9.07225	6.6475e-05	2.21591e-05	2.07386e-05
FxS0	KEGG_PATHWAY	hsa04510:Focal adhesion	8	10.5263	3.51836e-05	P04004, P24043, P12110, P12109, P24821, P12111, P11047, P02751	42	203	8840	8.29463	0.00274061	0.00068608	0.000642101
F0Sy	KEGG_PATHWAY	hsa04610:Complement and coagulation cascades	18	21.1765	2.97805e-22	P04004, P05546, P01042, P08603, P0C0L4, P36980, P00748, P00734, P01009, P01008, P02679, P05155, P05156, P02675, P10909	53	88	8840	34.1166	4.55642e-20	4.55642e-20	4.31817e-20
F0Sy	KEGG_PATHWAY	hsa04512:ECM-receptor interaction	8	9.41176	7.64993e-07	P04004, P24043, P05556, P12110, P12109, P07996, P11047, P02751	53	89	8840	14.9926	0.000117037	5.8522e-05	5.5462e-05
F0Sy	KEGG_PATHWAY	hsa04510:Focal adhesion	9	10.5882	2.12901e-05	P04004, P24043, P04049, P05556, P12110, P12109, P07996, P11047, P02751	53	203	8840	7.39474	0.00325212	0.000921287	0.000873116
F0Sy	KEGG_PATHWAY	hsa05150:Staphylococcus aureus infection	7	8.23529	2.40859e-05	P0C0L4, P08603, P02679, P05156	53	100	8840	11.6755	0.00367841	0.000921287	0.000873116
F0Sy	KEGG_PATHWAY	hsa04820:Cytoskeleton in muscle cells	9	10.5882	5.53871e-05	P24043, P05556, P12110, P21810, P12109, P07585, P11055, P07996, P02751	53	232	8840	6.4704	0.00843865	0.00169484	0.00160623
F0Sy	KEGG_PATHWAY	hsa05133:Pertussis	6	7.05882	8.83155e-05	P05556, P0C0L4, P05155	53	78	8840	12.8302	0.013422	0.00225205	0.00213429
Biological process analysis
FS_comp	Category	Term	Count	%	PValue	Genes	List Total	Pop Hits	Pop Total	Fold Enrichment	Bonferroni	Benjamini	FDR
FxSy	GOTERM_BP_DIRECT	GO:0006953~acute-phase response	7	9.58904	5.11438e-09	P00738, P00734, P01009, P01877, P02765, P02751	70	40	19734	49.335	3.83578e-06	3.83578e-06	3.7335e-06
FxSy	GOTERM_BP_DIRECT	GO:0007155~cell adhesion	14	19.1781	2.38597e-08	P04004, P24043, P05556, P12109, Q16853, Q08380, P12111, P11047, P12110, Q6ISB3, P24821, P55083, P07996, P02751	70	517	19734	7.63404	1.78946e-05	6.56227e-06	6.38728e-06
FxSy	GOTERM_BP_DIRECT	GO:0006958~complement activation, classical pathway	7	9.58904	2.62491e-08	P01859, P01857, P01877, P02745, P01871, P01860, P10909	70	52	19734	37.95	1.96866e-05	6.56227e-06	6.38728e-06
FxSy	GOTERM_BP_DIRECT	GO:0007160~cell-matrix adhesion	7	9.58904	2.35607e-06	P04004, P05556, P28906, P02679, P02675, P02751, P08962	70	110	19734	17.94	0.0017655	0.000441764	0.000429983
FxSy	GOTERM_BP_DIRECT	GO:0019731~antibacterial humoral response	6	8.21918	6.43972e-06	P01859, P01857, P01877, P02787, P01871, P01860	70	75	19734	22.5531	0.00481816	0.000965959	0.0009402
FxSy	GOTERM_BP_DIRECT	GO:0051918~negative regulation of fibrinolysis	4	5.47945	1.14108e-05	P04004, P02749, P00734, P07996	70	13	19734	86.7429	0.00852164	0.00142635	0.00138832
FxSy	GOTERM_BP_DIRECT	GO:0007596~blood coagulation	6	8.21918	1.94568e-05	P08603, P00734, P01009, P26927, P01008, P02675	70	94	19734	17.9945	0.0144868	0.00208465	0.00202906
FxSy	GOTERM_BP_DIRECT	GO:0050853~B cell receptor signaling pathway	5	6.84932	6.14605e-05	P01859, P01857, P01877, P01871, P01860	70	61	19734	23.1077	0.0450505	0.00574248	0.00558934
FxSy	GOTERM_BP_DIRECT	GO:0007041~lysosomal transport	4	5.47945	6.89097e-05	P07602, P20645, Q07954, P28799	70	23	19734	49.0286	0.0503712	0.00574248	0.00558934
FxS0	GOTERM_BP_DIRECT	GO:0006958~complement activation, classical pathway	7	9.21053	2.86526e-08	P01859, P01857, P01877, P01876, P02745, P01861, P01860	71	52	19734	37.4155	1.57301e-05	1.57303e-05	1.5501e-05
FxS0	GOTERM_BP_DIRECT	GO:0007155~cell adhesion	12	15.7895	1.92104e-06	P04004, P24043, P12110, Q6ISB3, P12109, Q16853, Q03001, P24821, P55083, P12111, P11047, P02751	71	517	19734	6.4513	0.0010541	0.000453239	0.000446634
FxS0	GOTERM_BP_DIRECT	GO:0050853~B cell receptor signaling pathway	6	7.89474	2.47672e-06	P01859, P01857, P01877, P01876, P01861, P01860	71	61	19734	27.3387	0.00135879	0.000453239	0.000446634
FxS0	GOTERM_BP_DIRECT	GO:0019731~antibacterial humoral response	6	7.89474	6.91464e-06	P01859, P01857, P01877, P01876, P01861, P01860	71	75	19734	22.2355	0.00378895	0.000949034	0.000935205
F0Sy	GOTERM_BP_DIRECT	GO:0007596~blood coagulation	10	11.7647	1.68015e-10	P01042, P05546, P08603, P00748, P00734, P01009, P26927, P01008, P05155, P02675	82	94	19734	25.602	1.25003e-07	9.36651e-08	9.15249e-08
F0Sy	GOTERM_BP_DIRECT	GO:0006953~acute-phase response	8	9.41176	2.51788e-10	P00738, P00734, P01009, Q86VB7, P02743, P02765, P02751	82	40	19734	48.1317	1.8733e-07	9.36651e-08	9.15249e-08
F0Sy	GOTERM_BP_DIRECT	GO:0010951~negative regulation of endopeptidase activity	8	9.41176	1.50806e-09	P29622, P04004, P01042, P05546, P01009, P02765, P05155, P05543	82	51	19734	37.7504	1.122e-06	3.2307e-07	3.15688e-07
F0Sy	GOTERM_BP_DIRECT	GO:0006958~complement activation, classical pathway	8	9.41176	1.73693e-09	P0C0L4, P01876, P05155, P05156, P10909	82	52	19734	37.0244	1.29228e-06	3.2307e-07	3.15688e-07
F0Sy	GOTERM_BP_DIRECT	GO:0006956~complement activation	7	8.23529	2.68693e-09	P0C0L4, P08603, P36980, P10909	82	31	19734	54.3423	1.99908e-06	3.99816e-07	3.9068e-07
F0Sy	GOTERM_BP_DIRECT	GO:0042730~fibrinolysis	5	5.88235	1.2138e-06	P00748, P00734, P02679, P05155, P02675	82	20	19734	60.1646	0.000902661	0.00013391	0.00013085
F0Sy	GOTERM_BP_DIRECT	GO:0007155~cell adhesion	13	15.2941	1.25991e-06	P04004, P24043, P05556, O15394, P12109, P54760, Q08380, P11047, P48509, P12110, Q6ISB3, P07996, P02751	82	517	19734	6.05138	0.000936932	0.00013391	0.00013085
F0Sy	GOTERM_BP_DIRECT	GO:2000427~positive regulation of apoptotic cell clearance	4	4.70588	3.67591e-06	P0C0L4	82	8	19734	120.329	0.00273115	0.00034186	0.000334049
F0Sy	GOTERM_BP_DIRECT	GO:0031638~zymogen activation	5	5.88235	9.84396e-06	P00738, P00748, P26927, Q86VB7	82	33	19734	36.4634	0.00729718	0.000813767	0.000795173
F0Sy	GOTERM_BP_DIRECT	GO:0051918~negative regulation of fibrinolysis	4	4.70588	1.84971e-05	P04004, P02749, P00734, P07996	82	13	19734	74.0488	0.0136677	0.00137618	0.00134474
F0Sy	GOTERM_BP_DIRECT	GO:0030194~positive regulation of blood coagulation	4	4.70588	4.34607e-05	P00748, P02749, P00734, P07996	82	17	19734	56.6255	0.0318183	0.00293952	0.00287236

## Sheet: Supplementary Table S2
Bioinformatics analysis of cluster3 and cluster4.
Cluster	Category	Term	Count	%	PValue	Genes	List Total	Pop Hits	Pop Total	Fold Enrichment	Bonferroni	Benjamini	FDR
Cluster3	GOTERM_BP_DIRECT	GO:0043686~co-translational protein modification	2	28.5714	0.0009119	Q8TCJ2, P46977	7	3	19734	1879.43	0.0410981	0.0419474	0.0419474
Cluster3	GOTERM_MF_DIRECT	GO:0004579~dolichyl-diphosphooligosaccharide-protein glycotransferase activity	2	28.5714	0.00155328	Q8TCJ2, P46977	7	5	19304	1103.09	0.0275929	0.027959	0.027959
Cluster4	GOTERM_BP_DIRECT	GO:0007229~integrin-mediated signaling pathway	4	20	0.000153009	P23229, O14672, P56199, P02751	20	110	19734	35.88	0.0366487	0.0373342	0.0367222
Cluster4	GOTERM_MF_DIRECT	GO:0005201~extracellular matrix structural constituent	6	30	8.15382e-08	P21810, Q92626, P35555, P55083, P11047, P02751	20	117	19304	49.4974	6.60457e-06	6.60459e-06	6.35998e-06
Cluster4	GOTERM_MF_DIRECT	GO:0005178~integrin binding	6	30	4.13705e-07	P23229, O14672, P56199, P35555, P11047, P02751	20	162	19304	35.7481	3.35095e-05	1.6755e-05	1.61345e-05
Cluster4	KEGG_PATHWAY	hsa04820:Cytoskeleton in muscle cells	8	40	2.29972e-08	P21810, P23229, P56199, Q9UH99, P35555, O94901, P14415, P02751	15	232	8840	20.3218	1.28784e-06	1.28784e-06	1.19586e-06
Cluster4	KEGG_PATHWAY	hsa04512:ECM-receptor interaction	4	20	0.000331405	P23229, P56199, P11047, P02751	15	89	8840	26.4869	0.0183905	0.00927933	0.00861652
Cluster4	KEGG_PATHWAY	hsa04151:PI3K-Akt signaling pathway	5	25	0.00199666	P23229, P56199, P14625, P11047, P02751	15	362	8840	8.13996	0.105889	0.037271	0.0346088
Cluster4	KEGG_PATHWAY	hsa04510:Focal adhesion	4	20	0.00360242	P23229, P56199, P11047, P02751	15	203	8840	11.6125	0.182986	0.0504338	0.0468314

## Sheet: Supplementary Table S3
Search results of gPeptide.
ID	Spectrum Index	Accession Number	p-Seq.	p-PTMs	z	Composition	GF score	Gly-bracket	Gly-bracket_num	GlycoSite	Glycosite	IPMD(ppm)	Abun. Coverage(%)	IPs Coverage(%)	Iso.m/z	Mol.Formula	NoBHs	RT(min)	Repository	Structure-diagnostic ions	Exp.m/z	Theo.MM(m/z)	Theo.m/z	TopN	delta_P_score	g-Linkage.	new pg score	p-MPs	p-PMPs
A8K2U0_QGNGTFVQTDKPLYTPGQQVYFR_3_HexNAc(2)Hex(9)	29350	A8K2U0	QGNGTFVQTDKPLYTPGQQVYFR	N3GlcNAc	3	N2H9F0S0	1	N,7;	7	120	3	2.10546	48.92	26.25	1504.66	C190H295N34O91	2	137.66	20_Oesophagus_human_15ug_TR2_240618_f	45AI3,	1504.33	4508.95	1504.32	1	7.3	01Y41Y41M(31M21M21M31G31G)61M(31M)61M	952.97	34	77.27
P02679_VDKDLQSLEDILHQVENK_17_HexNAc(4)Hex(5)NeuAc(1)	37034	P02679	VDKDLQSLEDILHQVENK	N17GlcNAc	3	N4H5F0S1	2	N,11;	11	78	17	1.42103	53.9	29.22	1346.93	C164H271N30O86	1	176.88	21_Bladder_human_15ug_TR3_240619_f	03AI5,35AI5,	1346.93	4036.78	1346.93	1	18.48	01Y41Y41M(31M41Y41L)61M61Y41L32S	950.58	41	114.71
P14415_FHVNYTQPLVAVK_4_HexNAc(2)Hex(6)	23707	P14415	FHVNYTQPLVAVK	N4GlcNAc	3	N2H6F0S0	4	N,16;	16	238	4	-1.3524	54.24	26.23	965.774	C124H197N20O58	1	118.84	human_brain_14ug_TR2_0703_f	BI2,BI2,ZI3,YI3,	965.774	2894.31	965.775	1	9.69	01Y41Y41M(31M21M)61M(31M)61M	847.91	33	129.17
P43308_IAPASNVSHTVVLRPLK_6_HexNAc(2)Hex(9)	20320	P43308	IAPASNVSHTVVLRPLK	N6GlcNAc	3	N2H9F0S0	0	N,12;	12	88	6	0.559305	47.32	23.17	1223.24	C151H257N26O77	1	96.11	04_Stomach_human_15ug_TR3_240614_f		1223.24	3666.7	1223.24	1	17.61	01Y41Y41M(31M21M21M)61M(31M21M)61M21M	821.25	31	90.63
P07602_NSTKQEILAALEK_1_HexNAc(2)Hex(5)	25274	P07602	NSTKQEILAALEK	N1GlcNAc	3	N2H5F0S0	18	N,10;	10	426	1	-0.17295	50.27	23.1	888.081	C108H186N19O57	1	120.8	18_adg_human_15ug_TR2_240615_f	01AI1,01AII1,01AIII1,BI1,BII1,BIII1,BI2,YI1,YI2,YI3,02XI1,ZI1,YI1,ZI2,YI2,BI4,ZI3,YI3,YI4,YII4,YIII3,02XI1,ZI1,YI1,	888.081	2661.22	888.081	1	0	01Y41Y41M(31M)61M(31M)61M	818.23	35	133.33
P02679_VDKDLQSLEDILHQVENK_17_HexNAc(4)Hex(4)NeuAc(1)	35915	P02679	VDKDLQSLEDILHQVENK	N17GlcNAc	4	N4H4F0S1	3	N,10;	10	78	17	1.19274	56.93	28.29	969.688	C158H261N30O81	1	172.71	19_Ovarian_human_15ug_TR2_240617_f	YI3,ZI3,YI3,	969.939	3874.72	969.938	2	4.71	01Y41Y41M(31M)61M(21Y41L32S)61Y	808.63	40	111.76
P01024_TVLTPATNHMGNVTFTIPANR_12_HexNAc(2)Hex(6)	29474	P01024	TVLTPATNHMGNVTFTIPANR	N12GlcNAc	3	N2H6F0S0	4	N,24;	24	85	12	2.31251	44.33	20.59	1212.55	C150H246N31O70S1	1	139.09	21_Bladder_human_15ug_TR3_240619_f	BI2,BI2,YI3,YI3,	1212.22	3633.64	1212.22	1	2.31	01Y41Y41M(31M21M)61M(31M)61M	806.41	36	87.5
P14415_FHVNYTQPLVAVK_4_HexNAc(2)Hex(7)	23625	P14415	FHVNYTQPLVAVK	N4GlcNAc	3	N2H7F0S0	4	N,16;	16	238	4	-1.31496	50.24	24.76	1019.79	C130H207N20O63	2	117.39	human_brain_14ug_TR3_0703_f	BI2,BIII3,BI2,BIII3,ZI3,ZIII3,YI3,YIII3,	1019.79	3056.36	1019.79	1	9.37	01Y41Y41M(31M21M21M)61M(31M)61M	798.38	35	133.33
Q8NHP8_HPDAVAWANLTNAIR_9_HexNAc(2)Hex(6)	29642	Q8NHP8	HPDAVAWANLTNAIR	N9GlcNAc	3	N2H6F0S0	4	N,24;	24	88	9	0.473638	50.45	23.59	1010.12	C125H200N25O61	1	142.1	18_adg_human_15ug_TR2_240615_f	BI2,BI2,ZI3,YI3,	1010.12	3027.33	1010.12	1	15.79	01Y41Y41M(31M)61M(31M21M)61M	767.49	34	114.29
P55290_INNTHALVSLLQNLNK_2_HexNAc(2)Hex(5)	30172	P55290	INNTHALVSLLQNLNK	N2GlcNAc	3	N2H5F0S0	18	N,12;	12	638	2	-0.861988	51.94	23.82	1003.82	C124H211N26O59	1	151.47	human_brain_14ug_TR1_0703_f_28802-	BI1,BII1,BIII1,BI2,BI2,CI2,45AI3,YI1,ZI2,YI2,YI3,02XI1,ZI1,YI1,BI4,ZI2,YI2,YI3,YI4,YII4,YIII3,YI1,	1003.82	3008.43	1003.82	1	0	01Y41Y41M(31M)61M(31M)61M	766.78	39	126.67
P46977_TILVDNNTWNNTHISR_10_HexNAc(2)Hex(9)	23036	P46977	TILVDNNTWNNTHISR	N10GlcNAc	3	N2H9F0S0	0	N,4;	4	548	10	0.751734	50.93	25.49	1255.54	C151H245N28O82	1	110.57	16_Pancreas_human_15ug_TR1_240614_f		1255.2	3762.59	1255.2	1	11.71	01Y41Y41M(31M21M21M)61M(31M21M)61M21M	741.44	34	106.67
P07339_GSLSYLNVTR_7_HexNAc(2)Hex(6)	22181	P07339	GSLSYLNVTR	N7GlcNAc	2	N2H6F0S0	5	N,6;	6	263	7	0.681083	70.43	25.79	1245.04	C100H167N16O56	2	105.9	18_adg_human_15ug_TR1_240615_f	BI2,CI2,ZI3,YI3,YI3,	1245.04	2488.07	1245.04	1	0	01Y41Y41M(31M21M)61M(31M)61M	738.58	24	116.67
O75629_VNETEMDIAK_2_HexNAc(2)Hex(6)	15776	O75629	VNETEMDIAK	N2GlcNAc	2	N2H6F0S0	4	N,7;	7	160	2	1.05853	58.22	22.56	1265.02	C99H167N14O59S1	1	74.83	18_adg_human_15ug_TR1_240615_f	BI2,CI2,ZI3,YI3,	1265.02	2528.02	1265.02	2	0	01Y41Y41M(31M21M)61M(31M)61M	736.77	28	138.89
P56199_SQNDKFNVSLTVK_7_HexNAc(2)Hex(5)	23432	P56199	SQNDKFNVSLTVK	N7GlcNAc	3	N2H5F0S0	17	N,30;	30	840	7	1.24171	52.32	24.15	899.742	C110H183N20O57	1	109.83	17_Prostate_human_15ug_TR2_240619_f	01AI1,01AII1,01AIII1,BI1,BII1,BIII1,BI2,YI1,ZI2,YI2,YI3,02XI1,ZI1,YI1,YI2,YI3,YI4,YII4,YIII3,02XI1,ZI1,YI1,YI2,	899.742	2696.2	899.741	1	0	01Y41Y41M(31M)61M(31M)61M	728.25	33	129.17
P14415_FHVNYTQPLVAVK_4_HexNAc(2)Hex(8)	23389	P14415	FHVNYTQPLVAVK	N4GlcNAc	3	N2H8F0S0	0	N,16;	16	238	4	-2.13296	54.43	28.69	1073.81	C136H217N20O68	1	117.3	human_brain_14ug_TR2_0703_f		1073.81	3218.41	1073.81	1	4.84	01Y41Y41M(31M21M21M)61M(31M21M)61M	725.6	33	129.17
P07602_NSTKQEILAALEK_1_HexNAc(2)Hex(6)	25016	P07602	NSTKQEILAALEK	N1GlcNAc	3	N2H6F0S0	4	N,10;	10	426	1	1.29004	51.17	25.41	942.099	C114H196N19O62	1	119.55	18_adg_human_15ug_TR1_240615_f	BI2,YI3,ZI3,YI3,	942.1	2823.28	942.098	1	11.55	01Y41Y41M(31M)61M(31M21M)61M	717.17	34	129.17
Q13061_KESLQLHNVTK_8_HexNAc(2)Hex(8)	16767	Q13061	KESLQLHNVTK	N8GlcNAc	3	N2H8F0S0	0	N,15;	15	647	8	2.37333	55.43	27.83	1000.78	C120H204N19O68	1	82.65	14_Muscle_human_10ug_TR2_231113_f		1000.78	2999.31	1000.78	2	17.54	01Y41Y41M(31M21M21M)61M(31M21M)61M	713.65	29	130
P05090_ADGTVNQIEGEATPVNLTEPAKLEVK_16_HexNAc(2)Hex(3)	27494	P05090	ADGTVNQIEGEATPVNLTEPAKLEVK	N16GlcNAc	3	N2H3F0S0	16	N,7;	7	98	16	2.22152	34.84	14.98	1206.25	C151H252N33O68	1	131.57	18_adg_human_15ug_TR1_240615_f	01AI1,01AII1,BI1,BII1,BI2,BI3,ZI1,YI1,ZI2,YI2,ZI3,ZII3,YI3,YII3,MH,02XI1,ZI1,YI1,YI2,YI3,YII3,	1206.25	3615.73	1206.25	1	0	01Y41Y41M(31M)61M	712.26	33	66
A8K2U0_HSNGSYSAFGER_3_HexNAc(2)Hex(6)	15217	A8K2U0	HSNGSYSAFGER	N3GlcNAc	3	N2H6F0S0	6	N,12;	12	1020	3	1.01497	59.77	33.91	897.689	C107H165N20O60	1	70.85	20_Oesophagus_human_15ug_TR2_240618_f	02AI2,BI2,YI3,04XI3,ZI3,YI3,	897.689	2690.05	897.689	1	7.71	01Y41Y41M(31M)61M(31M21M)61M	706.6	30	122.73
Q13510_TVLENSTSYEEAK_5_HexNAc(2)Hex(5)	15757	Q13510	TVLENSTSYEEAK	N5GlcNAc	2	N2H5F0S0	21	N,9;	9	259	5	0.0925253	43.31	19.03	1344.56	C108H176N17O61	1	74.49	18_adg_human_15ug_TR3_240615_f	BI1,BII1,BIII1,CI3,25AI2,02AI4,BI2,45AI3,02XI1,ZI1,YI1,ZI2,YI2,BI4,ZI3,YI3,YI4,YII4,YIII3,MH,02XI1,ZI1,YI1,YI2,YI3,	1344.56	2687.12	1344.56	1	0	01Y41Y41M(31M)61M(31M)61M	702.33	30	112.5
P14415_KFHVNYTQPLVAVK_5_HexNAc(2)Hex(6)	21584	P14415	KFHVNYTQPLVAVK	N5GlcNAc	3	N2H6F0S0	5	N,12;	12	238	5	-0.581541	51.13	22.95	1008.47	C130H209N22O59	1	109.56	human_brain_14ug_TR1_0703_f_new	BI2,BI2,YI3,ZI3,YI3,	1008.47	3022.4	1008.47	1	5	01Y41Y41M(31M21M)61M(31M)61M	698.51	32	115.38
P43308_IAPASNVSHTVVLRPLK_6_HexNAc(2)Hex(8)	21016	P43308	IAPASNVSHTVVLRPLK	N6GlcNAc	3	N2H8F0S0	0	N,10;	10	88	6	-0.116704	48.54	24.09	1169.56	C145H247N26O72	2	101.21	02_RE_Liver_human_15ug_TR1_240613_f		1169.22	3504.65	1169.22	1	10.03	01Y41Y41M(31M21M21M)61M(31M21M)61M	697.8	30	87.5
A8K2U0_QGNGTFVQTDKPLYTPGQQVYFR_3_HexNAc(2)Hex(8)	29456	A8K2U0	QGNGTFVQTDKPLYTPGQQVYFR	N3GlcNAc	3	N2H8F0S0	2	N,3;	3	120	3	2.04097	51.29	28.31	1450.64	C184H285N34O86	1	138.18	20_Oesophagus_human_15ug_TR2_240618_f	25AIII2,02AIII2,	1450.31	4346.9	1450.31	1	12.6	01Y41Y41M(31M21M21M31G)61M(31M)61M	695.53	28	63.64
O14773_FLSSSPHLPPSSYFNASGR_15_HexNAc(2)Hex(3)	26381	O14773	FLSSSPHLPPSSYFNASGR	N15GlcNAc	3	N2H3F0S0	14	N,9;	9	443	15	0.50443	49.04	20.38	982.112	C127H192N27O53	1	126.21	18_adg_human_15ug_TR1_240615_f	BI1,BII1,BI2,BI3,ZI1,YI1,ZI2,YI2,02XI1,ZI1,YI1,ZI2,YI2,YI3,YII3,YI1,	982.112	2943.32	982.111	1	0	01Y41Y41M(31M)61M	690.52	30	80.56
P02675_GTAGNALMDGASQLMGENR_18_HexNAc(4)Hex(5)NeuAc(1)	32135	P02675	GTAGNALMDGASQLMGENR	N18GlcNAc	3	N4H5F0S1	0	N,13;	13	394	18	1.66365	52.49	31.18	1270.19	C147H245N30O82S2	1	151.6	21_Bladder_human_15ug_TR1_240619_f		1270.19	3806.54	1270.19	1	3.82	01Y41Y41M(31M)61M(21Y41L32S)61Y41L	689.93	41	102.78
Q14108_CNMINGTDGDSFHPLITK_5_HexNAc(2)Hex(8)	24749	Q14108	CNMINGTDGDSFHPLITK	C1CamN5GlcNAc	3	N2H8F0S0	2	N,8;	8	249	5	0.238832	44.8	24.97	1242.18	C149H241N26O79S2	1	118.27	18_adg_human_15ug_TR2_240615_f	35AI3,03AI3,	1242.18	3722.51	1242.18	2	13.69	01Y41Y41M(31M21M21M)61M(31M21M)61M	689.12	31	85.29
P07602_NSTKQEILAALEK_1_HexNAc(2)Hex(4)	25352	P07602	NSTKQEILAALEK	N1GlcNAc	3	N2H4F0S0	21	N,10;	10	426	1	0.738197	47.21	20.54	834.064	C102H176N19O52	1	121.18	18_adg_human_15ug_TR1_240615_f	01AI1,01AII1,01AII2,BI1,BII1,BII2,04AI2,13AII2,CI2,BII2,BI2,YI1,YI2,YII3,02XI1,ZI1,YI1,ZI2,YI2,ZII3,YII3,02XI1,ZI1,YI1,	834.064	2499.17	834.063	1	0	01Y41Y41M(31M21M)61M	683.03	35	133.33
P14415_FLEPYNDSIQAQK_6_HexNAc(2)Hex(6)	20817	P14415	FLEPYNDSIQAQK	N6GlcNAc	2	N2H6F0S0	4	N,20;	20	118	6	-0.276144	43.48	19.66	1466.62	C122H192N19O63	1	103.64	human_brain_14ug_TR3_0703_f	BI2,CI2,ZI3,YI3,	1466.62	2931.24	1466.63	1	9.09	01Y41Y41M(31M21M)61M(31M)61M	681.72	33	125
P05090_CIQANYSLMENGK_5_HexNAc(2)Hex(3)	21131	P05090	CIQANYSLMENGK	C1CamN5GlcNAc	2	N2H3F0S0	14	N,18;	18	65	5	-1.5227	40.45	17.86	1211.01	C97H159N20O47S2	1	100.8	18_adg_human_15ug_TR1_240615_f	01AI1,01AII1,BI1,BII1,BI3,CI3,02XI1,YI1,02XI2,ZI2,YI2,ZI3,ZII3,YI3,YII3,02XI1,YI1,YI2,	1211.01	2420.01	1211.01	1	0	01Y41Y41M(31M)61M	678.53	33	129.17
Q13510_TVLENSTSYEEAK_5_HexNAc(2)Hex(6)	15614	Q13510	TVLENSTSYEEAK	N5GlcNAc	2	N2H6F0S0	4	N,12;	12	259	5	0.992828	49.56	22.43	1425.59	C114H186N17O66	2	73.83	18_adg_human_15ug_TR2_240615_f	25AI2,BI2,ZI3,YI3,	1425.59	2849.17	1425.59	1	0	01Y41Y41M(31M21M)61M(31M)61M	673.51	32	120.83
P02743_ESVTDHVNLITPLEKPLQNFTLCFR_19_HexNAc(4)Hex(5)NeuAc(1)	39596	P02743	ESVTDHVNLITPLEKPLQNFTLCFR	N19GlcNAcC23Cam	4	N4H5F0S1	3	N,4;	4	51	19	2.1653	47.9	25.91	1222.81	C206H331N40O93S1	1	189.5	21_Bladder_human_15ug_TR3_240619_f	YI3,ZI3,YI3,	1222.56	4885.21	1222.56	1	4.9	01Y41Y41M(31M)61M(21Y41L32S)61Y41L	672.48	27	54.17
P01876_LSLHRPALEDLLLGSEANLTCTLTGLR_18_HexNAc(5)Hex(3)	42704	P01876	LSLHRPALEDLLLGSEANLTCTLTGLR	N18GlcNAcC21Cam	4	N5H3F0S0	0	N,4;	4	144	18	2.60033	51.2	30.84	1117.55	C186H315N42O81S1	1	205.11	21_Bladder_human_15ug_TR3_240619_f		1117.55	4465.15	1117.55	1	44.61	01Y41Y41M(31M41Y)61M(21Y)61Y	670.2	27	51.92
P43251_NPVGLIGAENATGETDPSHSK_10_HexNAc(2)Hex(5)	19980	P43251	NPVGLIGAENATGETDPSHSK	N10GlcNAc	3	N2H5F0S0	21	N,6;	6	349	10	2.31613	36.31	19.28	1104.49	C133H217N28O69	1	95.19	18_adg_human_15ug_TR1_240615_f	BI1,BII1,BIII1,BI2,03AI2,CI2,CI3,24AI4,BI2,ZI1,YI1,ZI2,YI2,YI3,BI4,YI4,YII4,YIII3,02XI1,ZI1,YI1,ZI2,YI2,YI3,YI1,	1104.49	3310.43	1104.48	1	0	01Y41Y41M(31M)61M(31M)61M	667.06	35	85
Q8NHP8_HPDAVAWANLTNAIR_9_HexNAc(2)Hex(7)	29580	Q8NHP8	HPDAVAWANLTNAIR	N9GlcNAc	3	N2H7F0S0	4	N,24;	24	88	9	-0.272397	54.57	28.57	1064.13	C131H210N25O66	1	141.79	18_adg_human_15ug_TR2_240615_f	BI2,BIII3,BI2,BIII3,ZI3,ZIII3,YI3,YIII3,	1064.13	3189.38	1064.13	1	9.49	01Y41Y41M(31M21M21M)61M(31M)61M	666.13	32	110.71
Q8TCJ2_TTLVDNNTWNNSHIALVGK_10_HexNAc(2)Hex(9)	26203	Q8TCJ2	TTLVDNNTWNNSHIALVGK	N10GlcNAc	3	N2H9F0S0	0	N,3;	3	627	10	-0.0478415	44.44	23.98	1321.91	C161H262N29O85	1	126.95	02_RE_Liver_human_15ug_TR1_240613_f		1321.91	3961.71	1321.91	1	22.57	01Y41Y41M(31M21M21M31G)61M(31M21M)61M	660.39	38	100
P07602_NSTKQEILAALEK_1_HexNAc(2)Hex(7)	25167	P07602	NSTKQEILAALEK	N1GlcNAc	3	N2H7F0S0	4	N,9;	9	426	1	0.448786	49.53	22.85	996.116	C120H206N19O67	1	120.25	18_adg_human_15ug_TR3_240615_f	45AI3,YI3,ZI3,YI3,	996.116	2985.33	996.116	2	9.6	01Y41Y41M(31M)61M(31M21M)61M21M	654.7	34	125
Q15165_HTNMNLTQLK_5_HexNAc(2)Hex(8)	18113	Q15165	HTNMNLTQLK	N5GlcNAc	3	N2H8F0S0	4	N,12;	12	254	5	0.833057	52.09	23.21	968.408	C114H193N18O66S1	1	85.88	18_adg_human_15ug_TR2_240615_f	45AI3,ZI3,YI3,YI3,	968.408	2902.2	968.407	1	12	01Y41Y41M(31M21M)61M(31M21M)61M21M	653.12	25	127.78
Q8NHP8_HPDAVAWANLTNAIR_9_HexNAc(2)Hex(5)	29617	Q8NHP8	HPDAVAWANLTNAIR	N9GlcNAc	3	N2H5F0S0	16	N,16;	16	88	9	-0.0366193	51.58	23.09	956.099	C119H190N25O56	1	141.88	18_adg_human_15ug_TR1_240615_f	BI1,BII1,BIII1,BI2,BI2,YI1,ZI2,YI2,02XI1,ZI1,YI1,BI4,ZI2,YI2,ZI3,YI3,YI4,YII4,YIII3,YI1,	956.099	2865.28	956.099	1	0	01Y41Y41M(31M)61M(31M)61M	652.91	32	110.71
P46977_TILVDNNTWNNTHISR_10_HexNAc(2)Hex(7)	23163	P46977	TILVDNNTWNNTHISR	N10GlcNAc	3	N2H7F0S0	3	N,4;	4	548	10	1.20256	48.17	24.36	1147.17	C139H225N28O72	1	111.2	16_Pancreas_human_15ug_TR1_240614_f	YI3,ZI3,YI3,	1147.17	3438.48	1147.17	1	7.12	01Y41Y41M(31M)61M(31M21M)61M21M	648.73	35	110
P01859_EEQFNSTFR_5_HexNAc(4)Hex(3)Fuc(1)	19052	P01859	EEQFNSTFR	N5GlcNAc	2	N4H3F1S0	0	N,3;	3	176	5	0.261496	58.01	29.75	1302.03	C106H165N18O57	1	88.11	21_Bladder_human_15ug_TR1_240619_f		1302.03	2602.06	1302.03	1	7.59	01Y41Y41M(31M41Y31F)61M61Y	648.32	18	93.75
O75629_VNETEMDIAK_2_HexNAc(2)Hex(7)	16013	O75629	VNETEMDIAK	N2GlcNAc	2	N2H7F0S0	6	N,6;	6	160	2	1.31758	60.25	22.92	1346.04	C105H177N14O64S1	1	75.77	18_adg_human_15ug_TR2_240615_f	04AI3,12AIII3,BI2,BIII3,ZI3,ZIII3,YI3,YIII3,YI3,YIII3,	1346.04	2690.07	1346.04	1	2.41	01Y41Y41M(31M21M21M)61M(31M)61M	647.3	27	133.33
P07339_GSLSYLNVTR_7_HexNAc(2)Hex(7)	21929	P07339	GSLSYLNVTR	N7GlcNAc	2	N2H7F0S0	5	N,12;	12	263	7	1.42738	61.65	21.64	1326.07	C106H177N16O61	1	104.72	18_adg_human_15ug_TR1_240615_f	BI2,BI2,ZI3,YI3,YI3,	1326.07	2650.12	1326.07	1	4.94	01Y41Y41M(31M21M)61M(31M21M)61M	644.94	26	127.78
P35555_CDSGFALDSEERNCTDIDECR_13_HexNAc(2)Hex(5)	21887	P35555	CDSGFALDSEERNCTDIDECR	C1CamN13GlcNAcC14CamC20Cam	3	N2H5F0S0	22	N,2;	2	1067	13	2.29792	49.93	24.42	1256.48	C144H230N33O78S3	1	103.82	19_Ovarian_human_15ug_TR2_240617_f	BI1,BII1,BIII1,BI2,25AI2,24AI4,BI2,35AI3,YI1,ZI2,YI2,BI4,ZI3,YI3,02XI1,03XI1,24XI1,ZI1,YI1,ZI2,YI2,ZI3,YI3,YI4,YII4,YIII3,	1256.48	3765.42	1256.48	1	0	01Y41Y41M(31M)61M(31M)61M	640.6	21	52.5
P00738_VVLHPNYSQVDIGLIK_6_HexNAc(4)Hex(5)NeuAc(2)	30410	P00738	VVLHPNYSQVDIGLIK	N6GlcNAc	3	N4H5F0S2	0	N,9;	9	241	6	1.47967	41.38	27.03	1334.6	C167H272N27O84	1	144.28	19_Ovarian_human_15ug_TR1_240617_f		1334.6	3999.78	1334.6	2	45.16	01Y41Y41M(31M)61M(21Y41L32S)61Y41L32S	638.88	34	106.67
P05164_ALLPFDNLHDDPCLLTNR_17_HexNAc(2)Hex(6)	33226	P05164	ALLPFDNLHDDPCLLTNR	C13CamN17GlcNAc	3	N2H6F0S0	4	N,13;	13	391	17	3.06148	44.99	21.41	1168.52	C145H233N28O69S1	1	164.76	11_Spleen_human_15ug_TR3_231108_f_24580-	BI2,CI2,BI2,YI3,	1168.52	3502.53	1168.52	2	0	01Y41Y41M(31M21M)61M(31M)61M	636.2	36	102.94
P14415_FLEPYNDSIQAQK_6_HexNAc(2)Hex(5)	20349	P14415	FLEPYNDSIQAQK	N6GlcNAc	2	N2H5F0S0	15	N,20;	20	118	6	0.274419	40.5	17.68	1385.6	C116H182N19O58	1	103.55	human_brain_14ug_TR1_0703_f_new	BI1,BII1,BIII1,BI2,ZI1,YI1,ZI2,YI2,BI4,ZI3,YI3,YI4,YII4,YIII3,MH,02XI1,ZI1,YI1,YI2,	1385.6	2769.19	1385.6	1	0	01Y41Y41M(31M)61M(31M)61M	635.38	33	125
P01857_EEQYNSTYR_5_HexNAc(4)Hex(3)Fuc(1)	11626	P01857	EEQYNSTYR	N5GlcNAc	2	N4H3F1S0	0	N,3;	3	180	5	1.24527	59.04	31.01	1318.03	C106H165N18O59	1	53.35	20_Oesophagus_human_15ug_TR2_240618_f		1318.03	2634.05	1318.03	1	18.25	01Y41Y41M(31M41Y31F)61M61Y	634.54	17	87.5
P14415_FLEPYNDSIQAQK_6_HexNAc(2)Hex(7)	20483	P14415	FLEPYNDSIQAQK	N6GlcNAc	2	N2H7F0S0	3	N,15;	15	118	6	-0.689538	35.18	15.66	1549.16	C128H202N19O68	1	103.13	human_brain_14ug_TR2_0703_f	BI2,BI2,YI3,	1547.65	3093.29	1547.65	1	4.32	01Y41Y41M(31M21M)61M(31M21M)61M	634.19	32	120.83
P02679_VDKDLQSLEDILHQVENK_17_HexNAc(4)Hex(5)NeuAc(2)	37755	P02679	VDKDLQSLEDILHQVENK	N17GlcNAc	4	N4H5F0S2	0	N,10;	10	78	17	1.27061	41.63	25.9	1083.23	C175H288N31O94	1	179.12	20_Oesophagus_human_15ug_TR3_240618_f		1083.23	4327.87	1083.22	1	31.74	01Y41Y41M(31M)61M(21Y41L32S)61Y41L32S	628.66	37	102.94
P01861_EEQFNSTYR_5_HexNAc(4)Hex(3)Fuc(1)	15734	P01861	EEQFNSTYR	N5GlcNAc	2	N4H3F1S0	0	N,3;	3	177	5	2.38744	57.51	28.85	1310.03	C106H165N18O58	1	72.46	21_Bladder_human_15ug_TR1_240619_f		1310.03	2618.05	1310.03	2	20.47	01Y41Y41M(31M41Y31F)61M61Y	627.47	18	93.75
P02679_DLQSLEDILHQVENK_14_HexNAc(4)Hex(5)NeuAc(1)	37363	P02679	DLQSLEDILHQVENK	N14GlcNAc	3	N4H5F0S1	2	N,11;	11	78	14	3.25926	47.92	24.85	1232.87	C149H245N26O81	1	184.77	11_Spleen_human_15ug_TR3_231108_f_24580-	YI3,YI3,	1232.54	3694.59	1232.53	2	17.39	01Y41Y41M(31M)61M(21Y41L32S)61Y41L	627.42	36	114.29
Q16610_HIPGLIHNMTAR_8_HexNAc(2)Hex(6)	21387	Q16610	HIPGLIHNMTAR	N8GlcNAc	3	N2H6F0S0	5	N,5;	5	444	8	0.0365085	37.22	14.4	914.077	C111H185N22O55S1	1	100.9	20_Oesophagus_human_15ug_TR1_240618_f	BI2,CI2,YI3,ZI3,YI3,	913.742	2738.21	913.742	1	4.79	01Y41Y41M(31M21M)61M(31M)61M	627.25	20	81.82
P12110_HAELSFVFLTDGVTGNDSLHESAHSMR_16_HexNAc(2)Hex(5)	34152	P12110	HAELSFVFLTDGVTGNDSLHESAHSMR	N16GlcNAc	4	N2H5F0S0	14	N,6;	6	954	16	0.197745	42.82	17.9	1044.71	C173H270N39O78S1	1	160.94	17_Prostate_human_15ug_TR1_240619_f	BI1,BII1,BIII1,BI2,YI1,ZI2,YI2,YI3,YI4,YII4,YIII3,ZI1,YI1,YI2,YI3,YI4,YII4,YIII3,ZI1,YI1,	1044.71	4173.81	1044.71	1	0	01Y41Y41M(31M)61M(31M)61M	623.69	31	59.62
Q16853_QPQPNVSELVVGPLPHPSYMR_5_HexNAc(2)Hex(6)	32072	Q16853	QPQPNVSELVVGPLPHPSYMR	N5GlcNAc	4	N2H6F0S0	5	N,7;	7	137	5	2.43818	37.83	19.39	931.928	C157H252N31O70S1	1	154.46	10_Fat_human_15ug_TR2_231011_f	BI2,BI2,ZI3,YI3,ZI3,	932.18	3723.68	932.178	1	16.81	01Y41Y41M(31M)61M(31M21M)61M	622.56	31	77.5
P01876_LSLHRPALEDLLLGSEANLTCTLTGLR_18_HexNAc(5)Hex(4)	42992	P01876	LSLHRPALEDLLLGSEANLTCTLTGLR	N18GlcNAcC21Cam	4	N5H4F0S0	1	N,3;	3	144	18	1.00651	53.39	31.39	1158.06	C192H325N42O86S1	1	205.94	21_Bladder_human_15ug_TR1_240619_f	02AII4,	1158.06	4627.21	1158.06	1	42.88	01Y41Y41M(31M41Y41L31Y)61M61Y	619.65	26	50
Q9UHG3_LLHALGGDDFLGMLNR_15_HexNAc(2)Hex(8)	34172	Q9UHG3	LLHALGGDDFLGMLNR	N15GlcNAc	3	N2H8F0S0	2	N,12;	12	196	15	2.00003	48.66	21.59	1149.51	C141H231N24O72S1	1	164.46	18_adg_human_15ug_TR1_240615_f	45AI3,YI3,	1149.17	3444.49	1149.17	1	10.81	01Y41Y41M(31M21M)61M(31M21M)61M21M	615.59	35	110
P01024_TVLTPATNHMGNVTFTIPANR_12_HexNAc(2)Hex(5)	29314	P01024	TVLTPATNHMGNVTFTIPANR	N12GlcNAc	3	N2H5F0S0	18	N,24;	24	85	12	2.66213	41.06	18.3	1158.2	C144H236N31O65S1	1	138.92	21_Bladder_human_15ug_TR2_240619_f	BI1,BII1,BIII1,BI2,45AI2,24AI4,BI2,ZI1,YI1,ZI2,YI2,YI3,BI4,02XI1,ZI1,YI1,ZI2,YI2,YI3,YI4,YII4,YIII3,	1158.2	3471.58	1158.2	1	0	01Y41Y41M(31M)61M(31M)61M	615.36	34	85
P51884_LHINHNNLTESVGPLPK_7_HexNAc(4)Hex(5)Fuc(1)NeuAc(1)	23825	P51884	LHINHNNLTESVGPLPK	N7GlcNAc	3	N4H5F1S1	0	N,20;	20	127	7	0.558869	42.36	25.45	1315.59	C162H265N30O82	1	111.82	21_Bladder_human_15ug_TR3_240619_f		1315.59	3942.75	1315.59	1	2.25	01Y(61F)41Y41M(31M41Y41L)61M61Y41L32S	614.61	35	103.13
A8K2U0_THHWNITAVK_5_HexNAc(2)Hex(6)	18279	A8K2U0	THHWNITAVK	N5GlcNAc	3	N2H6F0S0	5	N,10;	10	857	5	0.658055	50.52	18.16	862.711	C107H170N19O54	1	86.19	20_Oesophagus_human_15ug_TR1_240618_f	BI2,BI2,YI3,ZI3,YI3,	862.711	2585.11	862.711	2	0	01Y41Y41M(31M21M)61M(31M)61M	613.5	23	116.67
P56199_YNHTGQVIIYR_2_HexNAc(2)Hex(8)	18833	P56199	YNHTGQVIIYR	N2GlcNAc	3	N2H8F0S0	4	N,8;	8	460	2	1.0287	52.09	27.98	1023.11	C126H201N20O67	1	87.49	17_Prostate_human_15ug_TR2_240619_f	35AI3,YI3,ZI3,YI3,	1023.1	3066.29	1023.1	1	15.1	01Y41Y41M(31M21M)61M(31M21M)61M21M	613.25	28	125
P05164_ALLPFDNLHDDPCLLTNR_17_HexNAc(2)Hex(5)	33173	P05164	ALLPFDNLHDDPCLLTNR	C13CamN17GlcNAc	3	N2H5F0S0	15	N,14;	14	391	17	2.91347	41.32	18.89	1114.84	C139H223N28O64S1	1	165.25	11_Spleen_human_15ug_TR2_231108_f	BI1,BII1,BIII1,BI2,03AI2,CI2,BI2,YI1,YI2,02XI1,ZI1,YI1,02XI2,YI2,YI3,YI4,YII4,YIII3,YI1,	1114.5	3340.48	1114.5	1	0	01Y41Y41M(31M)61M(31M)61M	612.23	37	105.88
P56199_YNHTGQVIIYR_2_HexNAc(2)Hex(7)	19080	P56199	YNHTGQVIIYR	N2GlcNAc	3	N2H7F0S0	4	N,8;	8	460	2	0.870101	50.58	26.57	969.087	C120H191N20O62	1	89.05	17_Prostate_human_15ug_TR3_240619_f	35AI3,YI3,ZI3,YI3,	969.087	2904.24	969.086	2	14.76	01Y41Y41M(31M)61M(31M21M)61M21M	610.08	29	130
P01024_TVLTPATNHMGNVTFTIPANR_12_HexNAc(2)Hex(7)	29657	P01024	TVLTPATNHMGNVTFTIPANR	N12GlcNAc	3	N2H7F0S0	4	N,30;	30	85	12	1.71925	42.75	18.92	1266.57	C156H256N31O75S1	1	139.35	21_Bladder_human_15ug_TR1_240619_f	BI2,BI2,YI3,YI3,	1266.57	3795.69	1266.57	1	6.55	01Y41Y41M(31M21M)61M(31M21M)61M	608.77	33	82.5
P01857_EEQYNSTYR_5_HexNAc(4)Hex(3)	12136	P01857	EEQYNSTYR	N5GlcNAc	2	N4H3F0S0	0	N,3;	3	180	5	1.93338	68.92	24.84	1245	C100H155N18O55	1	55.63	21_Bladder_human_15ug_TR2_240619_f		1245	2487.99	1245	1	51.34	01Y41Y41M(31M41Y)61M61Y	608.68	18	93.75
P07339_YYKGSLSYLNVTR_10_HexNAc(2)Hex(6)	23735	P07339	YYKGSLSYLNVTR	N10GlcNAc	3	N2H6F0S0	4	N,8;	8	263	10	0.554125	46.13	17.61	981.77	C124H197N20O61	1	113.35	18_adg_human_15ug_TR1_240615_f	BI2,BI2,YI3,YI3,	981.771	2942.29	981.77	1	6.83	01Y41Y41M(31M21M)61M(31M)61M	606.56	27	104.17
P07602_TCDWLPKPNMSASCK_9_HexNAc(2)Hex(3)	23715	P07602	TCDWLPKPNMSASCK	C2CamN9GlcNAcC14Cam	3	N2H3F0S0	18	N,4;	4	101	9	-0.736973	45.1	16.44	896.711	C109H176N23O49S3	1	113.25	18_adg_human_15ug_TR1_240615_f	BI1,BII1,BI2,03AI2,CI2,34AI3,01AI2,34AI3,YI1,BI3,ZI2,YI2,YI3,YII3,02XI1,ZI1,YI1,YI2,YI3,YII3,YI1,	896.71	2687.11	896.711	1	0	01Y41Y41M(31M)61M	605.23	25	85.71
P07602_NSTKQEILAALEK_1_HexNAc(2)Hex(3)	25715	P07602	NSTKQEILAALEK	N1GlcNAc	3	N2H3F0S0	15	N,6;	6	426	1	-1.51078	47.51	20.39	780.38	C96H166N19O47	1	123	18_adg_human_15ug_TR2_240615_f	BI1,BII1,BI2,04AI2,02AI2,YI1,YI2,02XI1,ZI1,YI1,ZI2,YI2,YI3,YII3,02XI1,ZI1,YI1,	780.044	2337.12	780.045	1	0	01Y41Y41M(31M)61M	605.07	31	120.83
Q07954_LYWISSGNHTINR_8_HexNAc(2)Hex(5)	24238	Q07954	LYWISSGNHTINR	N8GlcNAc	3	N2H5F0S0	18	N,4;	4	1763	8	0.350665	50.05	20.84	926.744	C116H182N23O55	1	117.17	02_RE_Liver_human_15ug_TR3_240613_f	BI1,BII1,BIII1,BI2,04AI3,YI1,YI2,02XI1,ZI1,YI1,02XI2,ZI2,YI2,ZI3,YI3,YI4,YII4,YIII3,02XI1,ZI1,YI1,YI2,	926.745	2777.22	926.744	1	0	01Y41Y41M(31M)61M(31M)61M	602.59	30	116.67
P07339_GSLSYLNVTR_7_HexNAc(2)Hex(5)	22559	P07339	GSLSYLNVTR	N7GlcNAc	2	N2H5F0S0	21	N,6;	6	263	7	1.19506	68.44	22.73	1164.02	C94H157N16O51	1	107.66	18_adg_human_15ug_TR1_240615_f	03AI2,BI1,BII1,BIII1,CI1,CII1,CIII1,BI2,ZI1,YI1,02XI2,ZI2,YI2,ZI3,YI3,BI4,YI4,YII4,YIII3,MH,02XI1,34XI1,ZI1,YI1,ZI2,YI2,YI3,	1164.02	2326.02	1164.01	1	0	01Y41Y41M(31M)61M(31M)61M	601.29	24	116.67
A0ZSE6_STQEIEINYTRICANCAK_8_HexNAc(2)Hex(6)	19591	A0ZSE6	STQEIEINYTRICANCAK	N8GlcNAcC13CamC16Cam	4	N2H6F0S0	6	N,1;	1	66	8	-3.20603	35.19	14.34	888.377	C141H234N29O72S2	1	97.87	human_brain_14ug_TR3_0703_f	BI2,BI2,BI2,YI3,YI3,YI3,	888.378	3549.5	888.381	1	17.36	01Y41Y41M(31M)61M(31M21M)61M	600.63	8	23.53
P46977_TILVDNNTWNNTHISR_10_HexNAc(2)Hex(8)	23057	P46977	TILVDNNTWNNTHISR	N10GlcNAc	3	N2H8F0S0	0	N,4;	4	548	10	0.509699	50.73	25.72	1201.52	C145H235N28O77	1	110.68	16_Pancreas_human_15ug_TR1_240614_f		1201.18	3600.53	1201.18	1	4.63	01Y41Y41M(31M21M21M)61M(31M21M)61M	599.96	31	96.67
Q99538_SHTNTSHVMQYGNK_4_HexNAc(4)Hex(4)	10957	Q99538	SHTNTSHVMQYGNK	N4GlcNAc	4	N4H4F0S0	0	N,8;	8	263	4	-0.696807	48.04	32.93	767.07	C122H195N26O63S1	1	50.99	02_RE_Liver_human_15ug_TR1_240613_f		767.07	3064.26	767.071	1	5.02	01Y41Y41M(31M41Y41L)61M61Y	597.04	31	115.38
P01877_TPLTANITK_6_HexNAc(5)Hex(3)Fuc(1)	14712	P01877	TPLTANITK	N6GlcNAc	2	N5H3F1S0	0	N,10;	10	205	6	1.48013	41.36	19.05	1304.09	C106H181N16O58	1	72.69	15_bigintes_human_15ug_TR2_240616_f		1304.09	2606.17	1304.09	2	9.62	01Y(61F)41Y41M(31M41Y)61M(21Y)61Y	595.31	25	137.5
Q13061_ESLQLHNVTK_7_HexNAc(2)Hex(8)	17886	Q13061	ESLQLHNVTK	N7GlcNAc	2	N2H8F0S0	1	N,15;	15	647	7	2.47294	55.03	21.76	1436.62	C114H192N17O67	2	87.84	14_Muscle_human_10ug_TR2_231113_f	25AIII2,	1436.62	2871.21	1436.61	1	17.15	01Y41Y41M(31M21M21M31G)61M(31M)61M	595.23	25	122.22
Q8NDH2_TFLSIPSAPPLYLDSGNK_17_HexNAc(5)Hex(5)NeuAc(1)	37356	Q8NDH2	TFLSIPSAPPLYLDSGNK	N17GlcNAc	4	N5H5F0S1	0	N,2;	2	5568	17	3.41708	63.12	26.01	1010.2	C170H271N26O85	1	177.16	20_Oesophagus_human_15ug_TR3_240618_f		1010.45	4036.77	1010.45	1	51.14	01Y41Y41M(31M41Y)61M61Y41L31Y41L32S	594.01	8	17.65
P51884_LHINHNNLTESVGPLPK_7_HexNAc(4)Hex(5)Fuc(1)	22875	P51884	LHINHNNLTESVGPLPK	N7GlcNAc	4	N4H5F1S0	0	N,30;	30	127	7	-0.38556	28.75	26.79	914.17	C151H248N29O74	1	107.07	17_Prostate_human_15ug_TR1_240619_f		913.919	3651.65	913.92	1	3.52	01Y41Y41M(31M41Y(31F)41L)61M61Y41L	593.6	33	96.88
A8K2U0_LGHINFTISTK_5_HexNAc(2)Hex(9)	25827	A8K2U0	LGHINFTISTK	N5GlcNAc	3	N2H9F0S0	0	N,24;	24	867	5	0.627517	54.8	27.48	1032.78	C126H208N17O71	1	121.37	20_Oesophagus_human_15ug_TR3_240618_f		1032.78	3095.32	1032.78	2	4.84	01Y41Y41M(31M21M21M)61M(31M21M)61M21M	593.2	31	140
P69849_LENITTGTYTIHAQK_3_HexNAc(2)Hex(5)	20102	P69849	LENITTGTYTIHAQK	N3GlcNAc	3	N2H5F0S0	17	N,6;	6	369	3	1.24519	46.99	19.98	969.775	C120H197N22O60	1	95.79	18_adg_human_15ug_TR1_240615_f	01AI1,01AII1,01AIII1,BI1,BII1,BIII1,BI2,25AI2,01AI2,YI1,YI2,YI3,02XI1,ZI1,YI1,ZI2,YI2,YI3,YI4,YII4,YIII3,ZI1,YI1,	969.775	2906.3	969.774	1	0	01Y41Y41M(31M)61M(31M)61M	590.24	32	107.14
Q9Y222_QLHENQKNNPTLLENK_15_HexNAc(5)Hex(5)NeuAc(1)	36206	Q9Y222	QLHENQKNNPTLLENK	N15GlcNAc	4	N5H5F0S1	0	N,2;	2	422	15	6.92985	61.13	24.8	1010.45	C162H267N32O86	1	173.09	19_Ovarian_human_15ug_TR1_240617_f		1010.45	4036.75	1010.44	1	45.78	01Y41Y41M(31M41Y)61M61Y41L31Y41L32S	587.38	8	23.33
Q13061_KESLQLHNVTK_8_HexNAc(2)Hex(9)	16811	Q13061	KESLQLHNVTK	N8GlcNAc	3	N2H9F0S0	0	N,21;	21	647	8	1.52435	59.4	29.83	1054.79	C126H214N19O73	2	82.86	14_Muscle_human_10ug_TR2_231113_f		1054.79	3161.36	1054.79	2	0	01Y41Y41M(31M21M21M31G31G)61M(31M)61M	585.21	31	140
P01876_LSLHRPALEDLLLGSEANLTCTLTGLR_18_HexNAc(5)Hex(5)NeuAc(1)	42817	P01876	LSLHRPALEDLLLGSEANLTCTLTGLR	N18GlcNAcC21Cam	4	N5H5F0S1	0	N,2;	2	144	18	1.5176	66.03	36.5	1271.6	C209H352N43O99S1	1	206.41	21_Bladder_human_15ug_TR2_240619_f		1271.35	5080.36	1271.35	1	54.43	01Y41Y41M(31M41Y)61M61Y41L31Y41L32S	583.51	22	42.31
Q13510_TSQENISFETMYDVLSTKPVLNK_5_HexNAc(2)Hex(6)	36146	Q13510	TSQENISFETMYDVLSTKPVLNK	N5GlcNAc	3	N2H6F0S0	6	N,3;	3	348	5	2.25449	36.94	16.79	1342.27	C168H273N30O80S1	1	174.28	18_adg_human_15ug_TR1_240615_f	BI2,25AI2,25AI2,BI2,YI3,YI3,	1342.27	4022.79	1342.27	1	4.5	01Y41Y41M(31M21M)61M(31M)61M	581.94	30	68.18
Q7Z7H5_FTFTSHTPGDHQICLHSNSTR_18_HexNAc(2)Hex(5)	21055	Q7Z7H5	FTFTSHTPGDHQICLHSNSTR	C14CamN18GlcNAc	4	N2H5F0S0	21	N,7;	7	117	18	-0.222306	36.78	17.97	915.892	C150H232N35O69S1	1	100.34	18_adg_human_15ug_TR3_240615_f	BI1,BII1,BIII1,BI2,03AI4,03AI2,CI2,CI3,BI2,YI2,YI3,02XI1,YI4,YII4,YIII3,ZI1,YI1,ZI2,YI2,ZI3,YI3,YI4,YII4,YIII3,ZI1,YI1,YI2,	916.143	3659.54	916.143	1	0	01Y41Y41M(31M)61M(31M)61M	580.9	22	55
P01877_HYTNSSQDVTVPCR_4_HexNAc(5)Hex(3)Fuc(1)	13674	P01877	HYTNSSQDVTVPCR	N4GlcNAcC13Cam	3	N5H3F1S0	0	N,10;	10	92	4	0.973761	54.59	31.27	1104.79	C132H212N27O69S1	1	63.18	15_bigintes_human_15ug_TR1_240616_f		1104.79	3311.36	1104.79	1	2.83	01Y41Y41M(31M41Y)61M(21Y31F)61Y	580.8	29	100
A8K2U0_THHWNITAVK_5_HexNAc(3)Hex(3)	19312	A8K2U0	THHWNITAVK	N5GlcNAc	3	N3H3F0S0	7	N,15;	15	857	5	-0.482888	60.87	25.48	768.351	C97H153N20O44	1	90.23	20_Oesophagus_human_15ug_TR2_240618_f	BI1,BI2,CI2,ZI3,YI3,ZI4,YI4,	768.351	2302.03	768.351	1	51.04	01Y41Y41M(31M)61M61Y	580.79	24	122.22
Q15293_VVRPDSELGERPPEDNQSFQYDHEAFLGKEDSK_16_HexNAc(2)Hex(5)	25337	Q15293	VVRPDSELGERPPEDNQSFQYDHEAFLGKEDSK	N16GlcNAc	5	N2H5F0S0	18	N,0;	0	53	16	2.39256	51.91	20.16	1008.45	C211H325N48O94	1	129.08	12_Tetis_human_8ug_TR1_231109_f	BI1,BII1,BIII1,BI2,BI3,03AI2,CI2,YI1,YI2,YI3,YI4,YII4,YIII3,ZI1,YI1,BI4,ZI2,YI2,YI3,YI4,YII4,YIII3,ZI1,YI1,	1008.25	5035.21	1008.25	1	0	01Y41Y41M(31M)61M(31M)61M	577.66	18	28.13
Q9UHG3_GELNTSIFSSRPIDK_4_HexNAc(2)Hex(6)	27457	Q9UHG3	GELNTSIFSSRPIDK	N4GlcNAc	3	N2H6F0S0	4	N,6;	6	353	4	2.48685	48.82	23.81	1015.46	C124H205N22O65	1	131.96	10_Fat_human_15ug_TR3_231011_f	04AI3,BI2,YI3,YI3,	1015.12	3042.34	1015.12	1	14.23	01Y41Y41M(31M)61M(31M21M)61M	577.2	31	100
Q15293_VVRPDSELGERPPEDNQSFQYDHEAFLGKEDSK_16_HexNAc(3)Hex(3)Fuc(1)	23954	Q15293	VVRPDSELGERPPEDNQSFQYDHEAFLGKEDSK	N16GlcNAc	5	N3H3F1S0	20	N,0;	0	53	16	1.01667	36.72	22.66	1013.46	C213H328N49O93	1	114.43	18_adg_human_15ug_TR2_240615_f	25AI3,BI4,03AI5,02AI2,BI2,BI3,YI2,CI4,YI3,YI4,YI5,ZI1,YI1,ZI2,YI2,YI3,YI4,YI5,ZI1,YI1,	1013.26	5060.24	1013.26	1	80.22	01Y41Y41M(31M)61M61Y31F	576.22	17	26.56
P14415_KFHVNYTQPLVAVK_5_HexNAc(2)Hex(7)	22234	P14415	KFHVNYTQPLVAVK	N5GlcNAc	4	N2H7F0S0	4	N,14;	14	238	5	-0.969814	46.08	25.03	797.119	C136H219N22O64	2	110.54	human_brain_14ug_TR3_0703_f	03AI4,YI3,ZI3,YI3,	797.12	3184.46	797.12	2	0	01Y41Y41M(31M)61M(31M21M)61M21M	572.65	33	119.23
Q9BVK6_FTFTSHTPGEHQICLHSNSTK_18_HexNAc(2)Hex(6)	20480	Q9BVK6	FTFTSHTPGEHQICLHSNSTK	C14CamN18GlcNAc	4	N2H6F0S0	5	N,10;	10	125	18	0.830815	49.03	23.19	953.159	C157H244N33O74S1	1	97.65	18_adg_human_15ug_TR1_240615_f	BI2,BI2,BI2,YI3,YI3,	953.16	3807.61	953.159	1	6.73	01Y41Y41M(31M)61M(31M21M)61M	571.88	32	80
P01876_LSLHRPALEDLLLGSEANLTCTLTGLR_18_HexNAc(5)Hex(4)NeuAc(1)	44084	P01876	LSLHRPALEDLLLGSEANLTCTLTGLR	N18GlcNAcC21Cam	4	N5H4F0S1	0	N,3;	3	144	18	1.09637	57.31	27.86	1230.83	C203H342N43O94S1	1	211.27	21_Bladder_human_15ug_TR1_240619_f		1230.83	4918.3	1230.83	1	2.53	01Y41Y41M(31M41Y)(41Y)61M61Y41L32S	571.76	21	40.38
P05164_ALLPFDNLHDDPCLLTNR_17_HexNAc(2)Hex(4)	33299	P05164	ALLPFDNLHDDPCLLTNR	C13CamN17GlcNAc	3	N2H4F0S0	18	N,14;	14	391	17	1.36907	40.98	18.82	1060.48	C133H213N28O59S1	1	165.87	11_Spleen_human_15ug_TR2_231108_f	BI1,BII1,BII2,BI2,03AI2,14AII2,15AII2,BII2,BI2,CII2,YI1,YI2,BI3,02XI1,ZI1,YI1,ZI2,YI2,YII3,YI1,	1060.48	3178.42	1060.48	1	0	01Y41Y41M(31M21M)61M	571.72	34	97.06
P01877_HYTNSSQDVTVPCR_4_HexNAc(5)Hex(5)Fuc(1)NeuAc(1)	15131	P01877	HYTNSSQDVTVPCR	N4GlcNAcC13Cam	3	N5H5F1S1	0	N,5;	5	92	4	0.912072	62.81	29.99	1310.19	C155H249N28O87S1	1	69.98	21_Bladder_human_15ug_TR3_240619_f		1310.2	3926.56	1310.19	1	9.34	01Y41Y41M(31M41Y)61M61Y(31F)41L31Y41L32S	571.11	25	88.46
P01859_EEQFNSTFR_5_HexNAc(4)Hex(4)Fuc(1)	18681	P01859	EEQFNSTFR	N5GlcNAc	2	N4H4F1S0	0	N,4;	4	176	5	1.00162	53.13	33.19	1383.56	C112H175N18O62	1	86.92	21_Bladder_human_15ug_TR3_240619_f		1383.06	2764.11	1383.06	2	2.08	01Y41Y41M(31M41Y(31F)41L)61M61Y	571.01	15	75
Q16853_YLYLASNHSNK_7_HexNAc(5)Hex(5)Fuc(1)	17427	Q16853	YLYLASNHSNK	N7GlcNAc	3	N5H5F1S0	0	N,15;	15	592	7	0.840003	37.49	29.35	1094.8	C135H214N21O72	1	86.82	10_Fat_human_15ug_TR1_231011_f		1094.8	3281.37	1094.8	2	3.32	01Y41Y41M(31M41Y41L31Y41L)61M61Y31F	571	27	120
A0ZSE6_STQEIEINYTRICANCAK_8_HexNAc(2)Hex(5)	20118	A0ZSE6	STQEIEINYTRICANCAK	N8GlcNAcC13CamC16Cam	4	N2H5F0S0	20	N,0;	0	66	8	-4.91178	43.14	15.61	848.114	C135H224N29O67S2	1	100.32	human_brain_14ug_TR3_0703_f	BI1,BII1,BIII1,BI2,03AI4,YI1,YI2,YI3,ZI1,YI1,YI4,YII4,YIII3,ZI2,YI2,ZI3,YI3,YI4,YII4,YIII3,02XI1,ZI1,YI1,ZI2,YI2,YI3,	847.864	3387.45	847.868	1	0	01Y41Y41M(31M)61M(31M)61M	570.81	7	20.59
P28907_IFDKNSTFGSVEVHNLQPEK_5_HexNAc(2)Hex(5)	24308	P28907	IFDKNSTFGSVEVHNLQPEK	N5GlcNAc	4	N2H5F0S0	15	N,7;	7	219	5	0.140779	44.19	19.96	877.651	C148H234N29O68	1	116.11	18_adg_human_15ug_TR2_240615_f	BI1,BII1,BIII1,BI2,YI1,YI2,YI3,02XI1,ZI1,YI1,YI2,YI3,YI4,YII4,YIII3,02XI1,ZI1,YI1,YI2,	877.4	3505.57	877.4	1	0	01Y41Y41M(31M)61M(31M)61M	570.18	34	89.47
Q9Y4L1_LSALDNLLNHSSMFLK_9_HexNAc(2)Hex(6)	37517	Q9Y4L1	LSALDNLLNHSSMFLK	N9GlcNAc	3	N2H6F0S0	4	N,8;	8	830	9	1.86991	41.08	18.09	1061.48	C132H218N23O64S1	1	181.25	18_adg_human_15ug_TR2_240615_f	BI2,BI2,YI3,YI3,	1061.48	3181.42	1061.48	1	13.65	01Y41Y41M(31M)61M(31M21M)61M	570.1	32	100
Q8NHP8_RNQSLVQDMDSMVR_2_HexNAc(2)Hex(3)	27914	Q8NHP8	RNQSLVQDMDSMVR	N2GlcNAc	3	N2H3F0S0	13	N,11;	11	465	2	1.27579	66.09	24.14	858.046	C100H172N25O49S2	1	133.6	18_adg_human_15ug_TR1_240615_f	BI1,BII1,BI2,03AI3,YI1,BI3,YI2,02XI1,34XI1,YI1,ZI2,YI2,ZI3,ZII3,YI3,YII3,	858.046	2571.12	858.045	1	0	01Y41Y41M(31M)61M	569.44	33	123.08
P04233_YGNMTEDHVMHLLQNADPLK_3_HexNAc(2)Hex(9)	33236	P04233	YGNMTEDHVMHLLQNADPLK	N3GlcNAc	4	N2H9F0S0	1	N,6;	6	136	3	2.60245	47.47	24.12	1048.69	C170H273N30O87S2	1	165.56	11_Spleen_human_15ug_TR2_231108_f	03AI4,	1048.94	4190.73	1048.94	1	2.29	01Y41Y41M(31M21M21M)61M(31M21M)61M21M	569.32	29	76.32
P01877_HYTNSSQDVTVPCR_4_HexNAc(5)Hex(4)Fuc(1)	15026	P01877	HYTNSSQDVTVPCR	N4GlcNAcC13Cam	3	N5H4F1S0	0	N,10;	10	92	4	0.160024	52	29.2	1159.15	C138H222N27O74S1	1	69.46	21_Bladder_human_15ug_TR3_240619_f		1158.81	3473.42	1158.81	2	2.5	01Y41Y41M(31M41Y41L31Y)61M61Y31F	567.52	27	96.15
Q9BU23_SANSTLAQALHWTR_3_HexNAc(2)Hex(6)	27980	Q9BU23	SANSTLAQALHWTR	N3GlcNAc	3	N2H6F0S0	3	N,9;	9	616	3	0.796138	49.95	20.74	979.097	C119H193N24O61	1	133.97	18_adg_human_15ug_TR3_240615_f	BI2,BI2,YI3,	979.098	2934.27	979.097	1	4.54	01Y41Y41M(31M)61M(31M21M)61M	566.95	33	119.23
O75629_VNETEMDIAK_2_HexNAc(2)Hex(5)	15925	O75629	VNETEMDIAK	N2GlcNAc	2	N2H5F0S0	17	N,7;	7	160	2	0.867116	60.28	22.91	1183.99	C93H157N14O54S1	1	75.55	18_adg_human_15ug_TR1_240615_f	BI1,BII1,BIII1,25AI4,BI2,02XI1,ZI1,YI1,02XI2,ZI2,YI2,YI3,BI4,YI4,YII4,YIII3,02XI1,ZI1,YI1,YI2,YI3,	1183.99	2365.97	1183.99	1	0	01Y41Y41M(31M)61M(31M)61M	566.81	28	138.89
P14415_FHVNYTQPLVAVK_4_HexNAc(2)Hex(9)	22847	P14415	FHVNYTQPLVAVK	N4GlcNAc	3	N2H9F0S0	0	N,16;	16	238	4	-0.545545	44.57	17.74	1128.16	C142H227N20O73	1	115.79	human_brain_14ug_TR1_0703_f_new		1127.83	3380.47	1127.83	1	2.12	01Y41Y41M(31M21M21M)61M(31M21M)61M21M	566.57	33	129.17
Q16610_HIPGLIHNMTAR_8_HexNAc(2)Hex(8)	21567	Q16610	HIPGLIHNMTAR	N8GlcNAc	3	N2H8F0S0	0	N,5;	5	444	8	-1.29297	48.13	22.61	1022.11	C123H205N22O65S1	1	101.3	20_Oesophagus_human_15ug_TR3_240618_f		1021.78	3062.31	1021.78	2	5.13	01Y41Y41M(31M21M21M)61M(31M21M)61M	565.52	22	86.36
P07339_YYKGSLSYLNVTR_10_HexNAc(2)Hex(5)	24199	P07339	YYKGSLSYLNVTR	N10GlcNAc	3	N2H5F0S0	15	N,8;	8	263	10	-1.01965	42.99	16.06	928.086	C118H187N20O56	1	115.52	18_adg_human_15ug_TR3_240615_f	BI1,BII1,BIII1,BI2,YI1,YI2,02XI1,ZI1,YI1,ZI2,YI2,YI3,YI4,YII4,YIII3,02XI1,ZI1,YI1,YI2,	927.752	2780.24	927.753	1	0	01Y41Y41M(31M)61M(31M)61M	564.39	28	108.33
P02743_ESVTDHVNLITPLEKPLQNFTLCFR_19_HexNAc(4)Hex(5)NeuAc(2)	40745	P02743	ESVTDHVNLITPLEKPLQNFTLCFR	N19GlcNAcC23Cam	4	N4H5F0S2	0	N,4;	4	51	19	-0.546559	40.71	24.24	1295.59	C217H348N41O101S1	1	194.61	21_Bladder_human_15ug_TR1_240619_f		1295.33	5176.31	1295.33	1	17.73	01Y41Y41M(31M)61M(21Y41L32S)61Y41L32S	562.44	25	52.08
P50897_NHSIFLADINQER_1_HexNAc(2)Hex(3)Fuc(1)	24329	P50897	NHSIFLADINQER	N1GlcNAc	3	N2H3F1S0	18	N,7;	7	197	1	1.15725	30.78	20.2	866.059	C107H172N23O51	1	116.21	18_adg_human_15ug_TR2_240615_f	01AI1,01AII1,BI1,BII1,BI2,03AI3,45AI2,BI2,03AI2,CI2,02AI3,BI3,02XI1,ZI1,YI1,ZI2,YI2,YI3,YII3,02XI1,YI1,	866.059	2595.16	866.058	1	0	01Y(61F)41Y41M(31M)61M	558.65	30	116.67
P56199_YNHTGQVIIYR_2_HexNAc(2)Hex(9)	18111	P56199	YNHTGQVIIYR	N2GlcNAc	3	N2H9F0S0	0	N,8;	8	460	2	2.75894	45.19	19.83	1077.45	C132H211N20O72	1	84.5	21_Bladder_human_15ug_TR2_240619_f		1077.12	3228.35	1077.12	1	7.04	01Y41Y41M(31M21M21M31G)61M(31M21M)61M	554.87	24	110
Q9Y4L1_LSALDNLLNHSSMFLK_9_HexNAc(2)Hex(8)	37430	Q9Y4L1	LSALDNLLNHSSMFLK	N9GlcNAc	3	N2H8F0S0	2	N,20;	20	830	9	1.95152	43.37	24.71	1169.85	C144H238N23O74S1	1	180.75	18_adg_human_15ug_TR3_240615_f	YI3,YI3,	1169.52	3505.53	1169.52	1	7.02	01Y41Y41M(31M21M)61M(31M21M)61M21M	552.71	34	106.67
Q9BVK6_FTFTSHTPGEHQICLHSNSTK_18_HexNAc(2)Hex(5)	20592	Q9BVK6	FTFTSHTPGEHQICLHSNSTK	C14CamN18GlcNAc	5	N2H5F0S0	19	N,8;	8	125	18	-3.00842	47.75	18.84	730.117	C151H234N33O69S1	1	98.18	18_adg_human_15ug_TR1_240615_f	BI1,BII1,BIII1,BI2,BI3,03AI4,YI2,ZI1,YI1,ZI2,YI2,YI3,02XI1,ZI1,YI1,YI2,YI3,02XI1,ZI1,YI1,YI2,	730.316	3645.55	730.318	1	0	01Y41Y41M(31M)61M(31M)61M	552.37	27	67.5
P02679_VDKDLQSLEDILHQVENK_17_HexNAc(2)Hex(8)	35040	P02679	VDKDLQSLEDILHQVENK	N17GlcNAc	4	N2H8F0S0	4	N,11;	11	78	17	0.532893	43.6	20.59	957.677	C155H258N27O83	1	168.91	18_adg_human_15ug_TR2_240615_f	03AI4,45AI3,YI3,YI3,	957.678	3825.68	957.677	1	12.73	01Y41Y41M(31M21M)61M(31M21M)61M21M	552.16	36	102.94
Q96HD1_NASHLVCSACFGPCAR_1_HexNAc(2)Hex(5)	20738	Q96HD1	NASHLVCSACFGPCAR	N1GlcNAcC7CamC10CamC14Cam	3	N2H5F0S0	16	N,8;	8	205	1	0.565521	41.78	23.69	1009.08	C119H192N27O58S3	1	98.86	18_adg_human_15ug_TR2_240615_f	01AI1,01AII1,01AIII1,BI1,BII1,BIII1,BI2,45AI2,YI1,YI2,02XI1,ZI1,YI1,BI4,ZI2,YI2,YI3,YI4,YII4,YIII3,ZI1,YI1,	1008.74	3023.21	1008.74	1	0	01Y41Y41M(31M)61M(31M)61M	551.29	32	100
P02675_GTAGNALMDGASQLMGENR_18_HexNAc(4)Hex(6)Fuc(1)	31764	P02675	GTAGNALMDGASQLMGENR	N18GlcNAc	3	N4H6F1S0	0	N,13;	13	394	18	4.88649	33.15	28.59	1275.86	C148H248N29O83S2	1	150.46	21_Bladder_human_15ug_TR3_240619_f		1275.86	3823.55	1275.86	1	14.23	01Y41Y41M(31M(21Y41L21F)41Y41L)61M61M	551.04	41	105.56
Q9HDC9_AGPNGTLFVADAYK_4_HexNAc(2)Hex(5)	26473	Q9HDC9	AGPNGTLFVADAYK	N4GlcNAc	2	N2H5F0S0	16	N,10;	10	160	4	3.56259	47.04	19.69	1321.08	C111H175N18O55	1	134.82	12_Tetis_human_8ug_TR2_231109_f	BI1,BII1,BIII1,BI2,ZI1,YI1,ZI2,YI2,BI4,ZI3,YI3,ZI4,ZII4,ZIII3,YI4,YII4,YIII3,MH,02XI1,ZI1,YI1,YI2,	1321.08	2640.15	1321.08	1	0	01Y41Y41M(31M)61M(31M)61M	548.39	34	119.23
P02675_GTAGNALMDGASQLMGENR_18_HexNAc(4)Hex(5)NeuAc(2)	31166	P02675	GTAGNALMDGASQLMGENR	N18GlcNAc	4	N4H5F0S2	0	N,13;	13	394	18	2.00675	46.04	25.42	1025.42	C158H262N31O90S2	1	147.98	19_Ovarian_human_15ug_TR1_240617_f		1025.67	4097.63	1025.67	1	14.16	01Y41Y41M(31M)61M(21Y41L32S)61Y41L32S	545.49	42	108.33
Q96HE7_WGHNITEFQQR_4_HexNAc(2)Hex(6)	21267	Q96HE7	WGHNITEFQQR	N4GlcNAc	3	N2H6F0S0	5	N,8;	8	280	4	0.613572	51.94	19.69	932.393	C115H177N22O58	1	100.33	20_Oesophagus_human_15ug_TR1_240618_f	BI2,CI2,YI3,ZI3,YI3,	932.393	2794.16	932.392	1	11.75	01Y41Y41M(31M21M)61M(31M)61M	545.09	25	115
P51884_LHINHNNLTESVGPLPK_7_HexNAc(5)Hex(6)Fuc(1)NeuAc(1)	23211	P51884	LHINHNNLTESVGPLPK	N7GlcNAc	3	N5H6F1S1	0	N,12;	12	127	7	2.08929	45.21	27.61	1437.64	C176H288N31O92	1	108.68	17_Prostate_human_15ug_TR1_240619_f		1437.3	4307.88	1437.3	2	10.24	01Y41Y41M(31M)61M(21Y(31F)41L31Y41L32S)61Y41L	544.97	30	87.5
Q15293_VVRPDSELGERPPEDNQSFQYDHEAFLGKEDSK_16_HexNAc(2)Hex(6)	24014	Q15293	VVRPDSELGERPPEDNQSFQYDHEAFLGKEDSK	N16GlcNAc	5	N2H6F0S0	5	N,0;	0	53	16	-0.600543	50.71	17.52	1040.86	C217H335N48O99	1	114.67	18_adg_human_15ug_TR3_240615_f	BI2,CI2,BI2,YI3,YI3,	1040.66	5197.27	1040.66	2	0	01Y41Y41M(31M21M)61M(31M)61M	544.81	14	21.88
P07585_LGLSFNSISAVDNGSLANTPHLR_13_HexNAc(4)Hex(4)Fuc(1)	33612	P07585	LGLSFNSISAVDNGSLANTPHLR	N13GlcNAc	3	N4H4F1S0	0	N,5;	5	262	13	2.43528	45.35	24.35	1331.28	C165H270N35O78	1	159.65	17_Prostate_human_15ug_TR3_240619_f		1331.28	3989.82	1331.28	1	3.68	01Y41Y41M(31M41Y(31F)41L)61M61Y	542.26	35	72.73
Q9Y4L1_VFGSQNLTTVK_6_HexNAc(2)Hex(5)	20385	Q9Y4L1	VFGSQNLTTVK	N6GlcNAc	2	N2H5F0S0	19	N,12;	12	515	6	-0.0250237	48.97	18.42	1206.04	C99H165N16O52	1	97.98	16_Pancreas_human_15ug_TR2_240614_f	03AI2,BI1,BII1,BIII1,BI2,45AI3,ZI1,YI1,02XI2,ZI2,YI2,ZI3,YI3,BI4,YI4,YII4,YIII3,MH,02XI1,ZI1,YI1,YI2,YI3,	1206.04	2410.08	1206.04	1	0	01Y41Y41M(31M)61M(31M)61M	542.01	27	120
Q9BU23_SANSTLAQALHWTR_3_HexNAc(2)Hex(8)	27669	Q9BU23	SANSTLAQALHWTR	N3GlcNAc	3	N2H8F0S0	0	N,10;	10	616	3	-0.0779214	51.94	23.84	1087.13	C131H213N24O71	1	132.47	18_adg_human_15ug_TR2_240615_f		1087.13	3258.38	1087.13	2	8.98	01Y41Y41M(31M21M21M)61M(31M21M)61M	541.82	34	123.08
P01877_TPLTANITK_6_HexNAc(2)Hex(8)	15315	P01877	TPLTANITK	N6GlcNAc	2	N2H8F0S0	0	N,5;	5	205	6	2.22567	50.21	18.71	1332.07	C106H182N13O64	1	70.98	15_bigintes_human_15ug_TR1_240616_f		1331.58	2661.14	1331.57	1	2.32	01Y41Y41M(31M21M21M31G)61M(31M)61M	540.89	24	131.25
P23946_YNTSTLHHDIMLLK_2_HexNAc(2)Hex(6)	28443	P23946	YNTSTLHHDIMLLK	N2GlcNAc	4	N2H6F0S0	3	N,9;	9	103	2	0.625189	46.87	22.84	767.093	C127H207N22O62S1	2	132.98	17_Prostate_human_15ug_TR1_240619_f	BI2,CI2,YI3,	767.093	3064.34	767.093	1	0	01Y41Y41M(31M21M)61M(31M)61M	537.55	33	123.08
P05164_ALLPFDNLHDDPCLLTNR_17_HexNAc(2)Hex(3)	33278	P05164	ALLPFDNLHDDPCLLTNR	C13CamN17GlcNAc	3	N2H3F0S0	13	N,14;	14	391	17	1.35691	39.57	17.53	1006.46	C127H203N28O54S1	1	166.28	11_Spleen_human_15ug_TR1_231108_f	BI1,BII1,BI2,03AI2,CI2,BI3,YI2,02XI1,ZI1,YI1,ZI2,YI2,YI3,YII3,YI1,	1006.46	3016.37	1006.46	1	0	01Y41Y41M(31M)61M	536.85	33	94.12
A8K2U0_HSNGSYSAFGER_3_HexNAc(3)Hex(3)	15453	A8K2U0	HSNGSYSAFGER	N3GlcNAc	3	N3H3F0S0	11	N,6;	6	1020	3	0.497471	59.48	23.5	803.329	C97H148N21O50	1	72.17	20_Oesophagus_human_15ug_TR3_240618_f	BI1,CI1,45AI2,02AI2,15AI2,BI2,CI2,ZI3,YI3,ZI4,YI4,	803.329	2406.97	803.329	1	50.04	01Y41Y41M(31M)61M61Y	536.74	24	100
P02679_VDKDLQSLEDILHQVENK_17_HexNAc(4)Hex(5)	35411	P02679	VDKDLQSLEDILHQVENK	N17GlcNAc	4	N4H5F0S0	3	N,10;	10	78	17	1.44699	34.43	25.97	937.677	C153H254N29O78	1	170.26	19_Ovarian_human_15ug_TR2_240617_f	YI3,ZI3,YI3,	937.428	3745.68	937.427	2	23.98	01Y41Y41M(31M)61M(21Y41L)61Y41L	536.39	38	105.88
P56199_SENASLVLSSSNQK_3_HexNAc(2)Hex(5)	17679	P56199	SENASLVLSSSNQK	N3GlcNAc	2	N2H5F0S0	24	N,4;	4	1113	3	1.41176	42.16	19.01	1341.08	C105H179N20O60	1	81.83	17_Prostate_human_15ug_TR2_240619_f	03AI2,BI1,BII1,BIII1,03AI2,CI2,02AI3,01AI3,24AI4,BI2,14XI1,02XI1,ZI1,YI1,ZI2,YI2,BI4,ZI3,YI3,ZI4,ZII4,ZIII3,YI4,YII4,YIII3,MH,02XI1,ZI1,YI1,YI2,	1341.09	2680.16	1341.08	1	0	01Y41Y41M(31M)61M(31M)61M	536.37	30	103.85
Q13510_TVLENSTSYEEAK_5_HexNAc(2)Hex(7)	15335	Q13510	TVLENSTSYEEAK	N5GlcNAc	2	N2H7F0S0	4	N,6;	6	259	5	1.30949	47.42	21.21	1506.62	C120H196N17O71	2	72.72	18_adg_human_15ug_TR1_240615_f	45AI3,04AI4,ZI3,YI3,	1506.62	3011.22	1506.62	1	9.21	01Y41Y41M(31M)61M(31M21M)61M21M	534.72	30	112.5
Q9UHL4_NLSASVIAVTIQGGAHHLDLR_1_HexNAc(2)Hex(7)	32305	Q9UHL4	NLSASVIAVTIQGGAHHLDLR	N1GlcNAc	4	N2H7F0S0	3	N,9;	9	428	1	1.65837	30.96	19.08	929.187	C152H255N32O74	1	155.27	18_adg_human_15ug_TR3_240615_f	BI2,BIII3,CI2,CIII3,BI2,BIII3,	929.187	3712.72	929.186	2	1.84	01Y41Y41M(31M21M21M)61M(31M)61M	534.7	39	97.5
P69849_LENITTGTYTIHAQK_3_HexNAc(2)Hex(6)	20255	P69849	LENITTGTYTIHAQK	N3GlcNAc	3	N2H6F0S0	3	N,7;	7	369	3	-0.702692	45.94	20.4	1024.13	C126H207N22O65	1	96.48	18_adg_human_15ug_TR2_240615_f	BI2,YI3,YI3,	1023.79	3068.36	1023.79	1	11.26	01Y41Y41M(31M)61M(31M21M)61M	533.84	32	107.14
Q10588_DSSGVIHVMLNGSEPTGAYPIK_11_HexNAc(2)Hex(6)	28837	Q10588	DSSGVIHVMLNGSEPTGAYPIK	N11GlcNAc	3	N2H6F0S0	5	N,15;	15	192	11	1.19257	45.24	22.65	1218.21	C151H245N28O73S1	1	137.83	19_Ovarian_human_15ug_TR3_240617_f	BI2,BI2,03AI3,YI3,YI3,	1218.21	3650.6	1218.21	1	6.55	01Y41Y41M(31M)61M(31M21M)61M	532.54	37	85.71
P21810_LLQVVYLHSNNITK_11_HexNAc(4)Hex(5)Fuc(1)NeuAc(1)	26731	P21810	LLQVVYLHSNNITK	N11GlcNAc	3	N4H5F1S1	0	N,16;	16	311	11	2.82754	43.48	23.48	1235.23	C154H254N25O78	1	126.18	21_Bladder_human_15ug_TR2_240619_f		1234.9	3701.67	1234.9	2	0.83	01Y41Y41M(31M41Y(31F)41L)61M61Y41L32S	531.81	32	115.38
P21589_GNVISSHGNPILLNSSIPEDPSIK_14_HexNAc(2)Hex(5)	28438	P21589	GNVISSHGNPILLNSSIPEDPSIK	N14GlcNAc	3	N2H5F0S0	16	N,20;	20	311	14	1.91562	45.95	19.72	1236.25	C154H255N32O72	1	135.85	19_Ovarian_human_15ug_TR3_240617_f	03AI2,01AI1,01AII1,01AIII1,BI1,BII1,BIII1,BI2,BI2,03AI2,CI2,25AI2,BI2,YI2,BI4,02XI1,ZI1,YI1,YI2,YI3,	1235.92	3704.73	1235.92	1	0	01Y41Y41M(31M)61M(31M)61M	531.66	40	86.96
Q9Y4L1_VFGSQNLTTVK_6_HexNAc(2)Hex(7)	20286	Q9Y4L1	VFGSQNLTTVK	N6GlcNAc	2	N2H7F0S0	6	N,12;	12	515	6	1.50608	56.01	20.76	1368.1	C111H185N16O62	1	97.1	16_Pancreas_human_15ug_TR1_240614_f	BI2,03AI3,BI2,ZI3,YI3,YI3,	1368.1	2734.18	1368.1	1	9.49	01Y41Y41M(31M21M)61M(31M21M)61M	531.41	28	125
Q9Y4L1_VFGSQNLTTVK_6_HexNAc(2)Hex(8)	20134	Q9Y4L1	VFGSQNLTTVK	N6GlcNAc	2	N2H8F0S0	3	N,16;	16	515	6	0.54374	51.04	19.13	1449.12	C117H195N16O67	1	96.7	16_Pancreas_human_15ug_TR3_240614_f	ZI3,YI3,YI3,	1449.12	2896.23	1449.12	1	9.21	01Y41Y41M(31M21M)61M(31M21M)61M21M	529.98	28	125
P27169_HANWTLTPLK_3_HexNAc(2)Hex(8)	23797	P27169	HANWTLTPLK	N3GlcNAc	3	N2H8F0S0	0	N,12;	12	253	3	0.998936	57.17	23.88	962.083	C119H192N17O64	2	114.99	02_RE_Liver_human_15ug_TR3_240613_f		962.083	2883.23	962.082	1	7.24	01Y41Y41M(31M21M21M)61M(31M21M)61M	529.76	26	127.78
Q86VF7_YKSDLNLTR_6_HexNAc(2)Hex(6)	22481	Q86VF7	YKSDLNLTR	N6GlcNAc	2	N2H6F0S0	4	N,1;	1	1660	6	1.26935	69.56	20	1245.04	C100H167N16O56	1	107.37	18_adg_human_15ug_TR2_240615_f	BI2,ZI3,YI3,YI3,	1245.04	2488.07	1245.04	1	2.55	01Y41Y41M(31M21M)61M(31M)61M	528.85	7	25
A8K2U0_LGHINFTISTK_5_HexNAc(2)Hex(6)	26038	A8K2U0	LGHINFTISTK	N5GlcNAc	3	N2H6F0S0	5	N,24;	24	867	5	-0.677667	50.5	20.81	870.727	C108H178N17O56	1	122.37	20_Oesophagus_human_15ug_TR3_240618_f	CI2,BI2,YI3,ZI3,YI3,	870.726	2609.16	870.726	1	11.68	01Y41Y41M(31M)61M(31M21M)61M	528.08	29	130
Q99538_DLNETIHYMYK_3_HexNAc(2)Hex(6)	25248	Q99538	DLNETIHYMYK	N3GlcNAc	3	N2H6F0S0	2	N,8;	8	167	3	1.15446	46.69	21.63	936.054	C116H182N17O60S1	2	120.66	18_adg_human_15ug_TR1_240615_f	BI2,YI3,	936.055	2805.14	936.054	1	0	01Y41Y41M(31M21M)61M(31M)61M	527.91	29	130
O95302_YHYNGTFLDGTLFDSSHNR_4_HexNAc(2)Hex(8)	30639	O95302	YHYNGTFLDGTLFDSSHNR	N4GlcNAc	4	N2H8F0S0	0	N,12;	12	174	4	-0.894878	46.89	28.24	987.904	C164H245N30O82	1	145.4	19_Ovarian_human_15ug_TR1_240617_f		987.904	3946.59	987.905	1	4.52	01Y41Y41M(31M21M21M)61M(31M21M)61M	527.76	35	94.44
Q13510_TSQENISFETMYDVLSTKPVLNK_5_HexNAc(2)Hex(5)	36230	Q13510	TSQENISFETMYDVLSTKPVLNK	N5GlcNAc	3	N2H5F0S0	20	N,2;	2	348	5	3.51938	34.05	15.65	1288.26	C162H263N30O75S1	1	174.71	18_adg_human_15ug_TR1_240615_f	BI1,BII1,BIII1,BI2,25AI2,CI3,24AI4,15AI2,BI2,02XI1,YI1,ZI2,BI4,YI2,YI3,YI4,YII4,YIII3,MH,02XI1,ZI1,YI1,YI2,YI3,	1288.26	3860.74	1288.25	1	0	01Y41Y41M(31M)61M(31M)61M	527.61	30	68.18
P02751_RHEEGHMLNCTCFGQGR_9_HexNAc(3)Hex(3)	16766	P02751	RHEEGHMLNCTCFGQGR	N9GlcNAcC10CamC12Cam	3	N3H3F0S0	9	N,0;	0	542	9	-0.938248	58	23.7	1062.43	C125H199N34O57S3	1	77.64	15_bigintes_human_15ug_TR1_240616_f	BI1,CI1,02AI2,BI2,YI3,YI4,ZI3,YI3,YI4,	1062.43	3184.29	1062.44	1	61.95	01Y41Y41M(31M)61M61Y	525.24	18	53.13
P01876_LSLHRPALEDLLLGSEANLTCTLTGLR_18_HexNAc(4)Hex(5)NeuAc(1)	43832	P01876	LSLHRPALEDLLLGSEANLTCTLTGLR	N18GlcNAcC21Cam	4	N4H5F0S1	3	N,5;	5	144	18	0.541733	49.52	31.45	1220.58	C201H339N42O94S1	1	210.06	21_Bladder_human_15ug_TR1_240619_f	03AI5,03AI5,35AI5,	1220.58	4877.28	1220.58	1	17.01	01Y41Y41M(31M41Y41L)61M61Y41L32S	524.29	26	50
P06280_HMSLALNR_7_HexNAc(2)Hex(6)	16829	P06280	HMSLALNR	N7GlcNAc	2	N2H6F0S0	6	N,6;	6	192	7	0.845202	80.64	28.65	1160.99	C91H155N16O51S1	1	79.91	18_adg_human_15ug_TR1_240615_f	15AI2,BI2,04XI3,ZI3,YI3,YI3,	1160.99	2319.97	1160.99	1	10.55	01Y41Y41M(31M)61M(31M21M)61M	524.25	19	114.29
P01860_EEQYNSTFR_5_HexNAc(4)Hex(3)Fuc(1)	15252	P01860	EEQYNSTFR	N5GlcNAc	2	N4H3F1S0	0	N,4;	4	227	5	1.0829	58.18	27.75	1310.03	C106H165N18O58	1	70.16	17_Prostate_human_15ug_TR1_240619_f		1310.03	2618.05	1310.03	1	12.94	01Y41Y41M(31M41Y31F)61M61Y	523.95	18	93.75
P15309_NETQHEPYPLMLPGCSPSCPLER_1_HexNAc(2)Hex(6)	30950	P15309	NETQHEPYPLMLPGCSPSCPLER	N1GlcNAcC15CamC19Cam	3	N2H6F0S0	3	N,9;	9	333	1	3.4864	39.29	20.82	1364.58	C167H265N34O78S3	1	146.13	17_Prostate_human_15ug_TR2_240619_f	BI2,YI3,YI3,	1364.91	4090.7	1364.91	1	15.9	01Y41Y41M(31M)61M(31M21M)61M	523.5	36	81.82
Q6RSH7_IIICNHSPR_5_HexNAc(2)Hex(6)	22349	Q6RSH7	IIICNHSPR	C4CamN5GlcNAc	2	N2H6F0S0	5	N,1;	1	60	5	3.52368	66.97	19.47	1245.04	C99H167N18O53S1	1	106.68	18_adg_human_15ug_TR1_240615_f	BI2,BI2,ZI3,YI3,YI3,	1245.04	2488.06	1245.04	1	7.66	01Y41Y41M(31M)61M(31M21M)61M	523.31	6	25
P01877_HYTNSSQDVTVPCR_4_HexNAc(4)Hex(5)Fuc(1)NeuAc(1)	15068	P01877	HYTNSSQDVTVPCR	N4GlcNAcC13Cam	3	N4H5F1S1	0	N,15;	15	92	4	0.366956	43.65	28.26	1242.17	C147H236N27O82S1	1	69.67	21_Bladder_human_15ug_TR3_240619_f		1242.17	3723.48	1242.17	2	0.68	01Y41Y41M(31M41Y41L)61M21Y(31F)41L32S	522.05	27	96.15
O14672_INTTADEKDPTNPFR_2_HexNAc(2)Hex(9)	20886	O14672	INTTADEKDPTNPFR	N2GlcNAc	3	N2H9F0S0	0	N,8;	8	278	2	1.90789	43.31	21.87	1195.83	C143H232N23O82	2	97.83	17_Prostate_human_15ug_TR3_240619_f		1195.5	3583.47	1195.5	2	0	01Y41Y41M(31M21M21M31G31G)61M(31M)61M	520.27	32	107.14
P55083_FNGSVSFFR_2_HexNAc(2)Hex(6)	28275	P55083	FNGSVSFFR	N2GlcNAc	2	N2H6F0S0	4	N,3;	3	87	2	1.55371	73.84	24.3	1220.51	C102H156N15O53	1	143.7	12_Tetis_human_8ug_TR1_231109_f	BI2,ZI3,YI3,YI3,	1220.51	2439	1220.5	2	0	01Y41Y41M(31M21M)61M(31M)61M	520.08	22	112.5
P56199_YNHTGQVIIYR_2_HexNAc(2)Hex(6)	19211	P56199	YNHTGQVIIYR	N2GlcNAc	3	N2H6F0S0	4	N,8;	8	460	2	1.62767	50.06	24.87	915.07	C114H181N20O57	1	89.26	17_Prostate_human_15ug_TR2_240619_f	BI2,BI2,YI3,YI3,	915.07	2742.19	915.069	2	0	01Y41Y41M(31M21M)61M(31M)61M	519.24	27	125
O60656_YTGTRPSNLANNTILVK_11_HexNAc(2)Hex(6)	22505	O60656	YTGTRPSNLANNTILVK	N11GlcNAc	3	N2H6F0S0	4	N,5;	5	344	11	1.06929	52.37	22.12	1081.17	C133H223N26O66	1	105.33	20_Oesophagus_human_15ug_TR2_240618_f	BI2,BI2,YI3,YI3,	1081.17	3240.49	1081.17	1	2.41	01Y41Y41M(31M21M)61M(31M)61M	518.94	25	71.88
P01877_HYTNSSQDVTVPCR_4_HexNAc(2)Hex(8)	13340	P01877	HYTNSSQDVTVPCR	N4GlcNAcC13Cam	3	N2H8F0S0	0	N,15;	15	92	4	1.10388	55.51	26.64	1123.12	C132H213N24O75S1	1	61.63	15_bigintes_human_15ug_TR1_240616_f		1123.12	3366.33	1123.12	2	0	01Y41Y41M(31M21M21M31G)61M(31M)61M	518.87	31	111.54
P07585_IADTNITSIPQGLPPSLTELHLDGNK_5_HexNAc(2)Hex(5)	34551	P07585	IADTNITSIPQGLPPSLTELHLDGNK	N5GlcNAc	3	N2H5F0S0	15	N,6;	6	211	5	0.978183	33.42	17.87	1321.63	C166H275N34O76	1	162.86	17_Prostate_human_15ug_TR1_240619_f	BI1,BII1,BIII1,BI2,CI1,CII1,CIII1,02AI3,24AI4,YI1,BI4,ZI2,YI2,YI3,YI4,YII4,YIII3,ZI1,YI1,YI2,YI3,	1321.63	3960.87	1321.63	1	0	01Y41Y41M(31M)61M(31M)61M	518.44	34	68
A8K2U0_THHWNITAVK_5_HexNAc(2)Hex(8)	18598	A8K2U0	THHWNITAVK	N5GlcNAc	3	N2H8F0S0	0	N,12;	12	857	5	0.449063	56.29	22.22	971.081	C119H190N19O64	2	86.92	20_Oesophagus_human_15ug_TR2_240618_f		970.746	2909.22	970.746	2	0	01Y41Y41M(31M21M21M)61M(31M21M)61M	518.41	23	116.67
O15230_VWQGHANASFCPHGYGCR_7_HexNAc(2)Hex(9)	17777	O15230	VWQGHANASFCPHGYGCR	N7GlcNAcC11CamC17Cam	4	N2H9F0S0	0	N,8;	8	1330	7	0.90795	47.91	24.29	993.643	C161H243N32O80S2	1	86.84	15_bigintes_human_15ug_TR3_240616_f		993.392	3968.54	993.391	1	2.28	01Y41Y41M(31M21M21M31G31G)61M(31M)61M	517.29	26	73.53
P07339_GSLSYLNVTR_7_HexNAc(2)Hex(8)	21931	P07339	GSLSYLNVTR	N7GlcNAc	2	N2H8F0S0	0	N,12;	12	263	7	1.48187	70.11	24.18	1407.1	C112H187N16O66	1	104.73	18_adg_human_15ug_TR1_240615_f		1407.1	2812.18	1407.09	1	2.49	01Y41Y41M(31M21M21M)61M(31M21M)61M	516.76	25	122.22
Q14108_CNMINGTDGDSFHPLITKDEVLYVFPSDFCR_5_HexNAc(2)Hex(8)	37160	Q14108	CNMINGTDGDSFHPLITKDEVLYVFPSDFCR	C1CamN5GlcNAcC30Cam	4	N2H8F0S0	4	N,1;	1	249	5	2.99807	42.56	18.25	1339.07	C224H346N43O101S3	1	179.45	18_adg_human_15ug_TR2_240615_f	45AI3,03AI4,YI3,YI3,	1339.07	5350.24	1339.07	1	25.56	01Y41Y41M(31M21M)61M(31M21M)61M21M	516.52	23	38.33
Q13637_VHLPNGSPIPAVLLANK_16_HexNAc(2)Hex(8)	25393	Q13637	VHLPNGSPIPAVLLANK	N16GlcNAc	3	N2H8F0S0	0	N,2;	2	143	16	-0.609463	41.29	16.1	1148.54	C144H241N24O71	1	122.92	02_RE_Liver_human_15ug_TR3_240613_f		1148.54	3442.6	1148.54	1	4.89	01Y41Y41M(31M21M21M)61M(31M21M)61M	516.27	10	25
O96005_RAEDYGPVEVISHWHPNITINIVDDHTPWVK_17_HexNAc(2)Hex(9)	37748	O96005	RAEDYGPVEVISHWHPNITINIVDDHTPWVK	N17GlcNAc	5	N2H9F0S0	3	N,0;	0	241	17	1.64682	57.33	20.46	1101.9	C236H362N47O103	1	182.43	18_adg_human_15ug_TR2_240615_f	03AI4,45AI3,03AI4,	1101.9	5502.45	1101.9	1	7.27	01Y41Y41M(31M21M21M)61M(31M21M)61M21M	515.26	22	36.67
P07602_TCDWLPKPNMSASCK_9_HexNAc(2)Hex(3)Fuc(1)	23716	P07602	TCDWLPKPNMSASCK	C2CamN9GlcNAcC14Cam	3	N2H3F1S0	13	N,5;	5	101	9	0.395461	27.48	17.25	945.397	C115H186N23O53S3	1	113.25	18_adg_human_15ug_TR3_240615_f	BI1,BII1,BI2,01AI2,34AI3,BI3,YI2,02XI1,ZI1,YI1,YI2,YI3,YII3,02XI1,YI1,	945.397	2833.17	945.397	1	0	01Y(61F)41Y41M(31M)61M	515.19	27	89.29
P01857_EEQYNSTYR_5_HexNAc(5)Hex(3)	12348	P01857	EEQYNSTYR	N5GlcNAc	2	N5H3F0S0	0	N,4;	4	180	5	2.50009	71.55	25.87	1346.54	C108H168N19O60	1	56.65	21_Bladder_human_15ug_TR2_240619_f		1346.54	2691.07	1346.54	1	26.27	01Y41Y41M(31M41Y)61M(21Y)61Y	515.18	18	93.75
Q5VT97_IGENYSKMDGPEVMIEQPIPMSK_4_HexNAc(3)Hex(5)	20369	Q5VT97	IGENYSKMDGPEVMIEQPIPMSK	N4GlcNAc	3	N3H5F0S0	4	N,2;	2	1125	4	7.68637	43.11	18.14	1338.6	C166H271N30O77S3	1	97.48	16_Pancreas_human_15ug_TR1_240614_f	BIII1,CIII1,02AIII2,YIII4,	1338.93	4012.74	1338.92	2	21.11	01Y41Y41M(31M41Y)61M(31M)61M	514.7	8	13.64
P23229_ANHSGAVVLLK_2_HexNAc(2)Hex(6)	16995	P23229	ANHSGAVVLLK	N2GlcNAc	3	N2H6F0S0	3	N,9;	9	323	2	-2.06226	56.34	25.45	830.046	C101H172N17O54	2	88.73	human_intestine_14ug_TR1_0704_f	BI2,BI2,YI3,	830.046	2487.12	830.047	1	0	01Y41Y41M(31M21M)61M(31M)61M	514.1	29	130
P53609_SNLNRCGFR_4_HexNAc(4)Hex(3)Fuc(1)	19217	P53609	SNLNRCGFR	N4GlcNAcC6Cam	2	N4H3F1S0	0	N,1;	1	91	4	1.22098	74.59	25.75	1285.05	C101H167N22O53S1	1	97.21	13_Heart_human_10ug_TR3_231111_f		1285.05	2568.08	1285.04	2	31.13	01Y41Y41M(31M41Y31F)61M61Y	511.93	9	37.5
P04233_YGNMTEDHVMHLLQNADPLK_3_HexNAc(2)Hex(8)	33457	P04233	YGNMTEDHVMHLLQNADPLK	N3GlcNAc	4	N2H8F0S0	3	N,7;	7	136	3	1.95529	45.19	21.21	1008.43	C164H263N30O82S2	2	165.89	11_Spleen_human_15ug_TR3_231108_f_24580-	03AI4,YI3,YI3,	1008.43	4028.68	1008.43	1	4.2	01Y41Y41M(31M21M)61M(31M21M)61M21M	510.74	32	84.21
P06280_HMSLALNR_7_HexNAc(2)Hex(7)	17000	P06280	HMSLALNR	N7GlcNAc	2	N2H7F0S0	4	N,6;	6	192	7	0.941694	75.8	26.78	1242.02	C97H165N16O56S1	1	80.54	18_adg_human_15ug_TR2_240615_f	15AI2,BI2,YI3,YI3,	1242.02	2482.03	1242.02	1	5.28	01Y41Y41M(31M21M)61M(31M21M)61M	510.63	18	107.14
P04062_DLGPTLANSTHHNVR_8_HexNAc(2)Hex(3)Fuc(1)	15741	P04062	DLGPTLANSTHHNVR	N8GlcNAc	3	N2H3F1S0	12	N,35;	35	309	8	0.917359	23.74	17.59	891.074	C108H177N26O52	1	74.44	18_adg_human_15ug_TR2_240615_f	BI1,BII1,BI2,BI3,YI2,YI3,YII3,02XI1,ZI1,YI1,ZI2,YI2,YI3,YII3,YI1,	891.074	2670.2	891.073	1	0	01Y(61F)41Y41M(31M)61M	510.5	36	121.43
Q13061_KESLQLHNVTK_8_HexNAc(2)Hex(5)	17209	Q13061	KESLQLHNVTK	N8GlcNAc	3	N2H5F0S0	19	N,21;	21	647	8	2.2313	53.11	24.15	838.724	C102H174N19O53	1	84.74	14_Muscle_human_10ug_TR2_231113_f	BI1,BII1,BIII1,BI2,CI3,YI1,YI2,YI3,02XI1,YI1,YI4,YII4,YIII3,02XI2,MH,ZI2,YI2,YI3,YI4,YII4,YIII3,02XI1,ZI1,YI1,YI2,	838.725	2513.15	838.723	1	0	01Y41Y41M(31M)61M(31M)61M	509.9	28	130
Q01459_QINSSISGNLWDKDQR_3_HexNAc(2)Hex(5)	22693	Q01459	QINSSISGNLWDKDQR	N3GlcNAc	3	N2H5F0S0	17	N,4;	4	299	3	0.109512	48.36	21.71	1027.12	C124H202N27O63	1	108.36	18_adg_human_15ug_TR2_240615_f	BI1,BII1,BIII1,BI2,03AI2,CI2,ZI1,YI1,ZI2,YI2,YI3,ZI4,ZII4,ZIII3,02XI1,YI1,YI2,ZI3,YI3,YI4,YII4,YIII3,YI1,	1026.79	3077.34	1026.79	1	0	01Y41Y41M(31M)61M(31M)61M	509.84	29	90
P07602_TNSTFVQALVEHVKEECDR_2_HexNAc(2)Hex(3)Fuc(1)	32829	P07602	TNSTFVQALVEHVKEECDR	N2GlcNAcC17Cam	3	N2H3F1S0	14	N,7;	7	215	2	0.90441	24.32	18.27	1101.49	C135H219N30O63S1	1	157.72	18_adg_human_15ug_TR1_240615_f	BI1,BII1,BI2,35AI3,15AI3,BI3,CI3,02XI1,YI1,YI2,YI3,YII3,02XI1,ZI1,YI1,YI2,	1101.16	3300.46	1101.16	1	0	01Y(61F)41Y41M(31M)61M	508.46	33	91.67
Q9Y4L1_VFGSQNLTTVK_6_HexNAc(2)Hex(9)	20050	Q9Y4L1	VFGSQNLTTVK	N6GlcNAc	2	N2H9F0S0	0	N,16;	16	515	6	-0.0773515	57.81	22.64	1530.15	C123H205N16O72	1	96.36	16_Pancreas_human_15ug_TR2_240614_f		1530.15	3058.29	1530.15	1	2.36	01Y41Y41M(31M21M21M)61M(31M21M)61M21M	507.9	27	120
P00738_VVLHPNYSQVDIGLIK_6_HexNAc(4)Hex(5)NeuAc(1)	31049	P00738	VVLHPNYSQVDIGLIK	N6GlcNAc	3	N4H5F0S1	3	N,8;	8	241	6	2.0506	50.33	22.72	1237.57	C156H255N26O76	1	146.91	21_Bladder_human_15ug_TR3_240619_f	03AI5,CII3,35AI5,	1237.57	3708.69	1237.57	1	15.85	01Y41Y41M(31M41Y41L)61M61Y41L32S	507.84	29	90
Q9HDC9_AGPNGTLFVADAYK_4_HexNAc(2)Hex(6)	26794	Q9HDC9	AGPNGTLFVADAYK	N4GlcNAc	2	N2H6F0S0	3	N,5;	5	160	4	2.10018	47.55	20.3	1402.11	C117H185N18O60	1	136.04	12_Tetis_human_8ug_TR3_231109_f	BI2,ZI3,YI3,	1402.11	2802.2	1402.1	1	6.87	01Y41Y41M(31M21M)61M(31M)61M	507.76	34	119.23
Q9UH99_ALSPNSTISSAPK_5_HexNAc(2)Hex(6)	16049	Q9UH99	ALSPNSTISSAPK	N5GlcNAc	2	N2H6F0S0	4	N,18;	18	636	5	1.28812	50.56	16.35	1326.59	C106H180N17O60	1	75.59	19_Ovarian_human_15ug_TR2_240617_f	BI2,ZI3,YI3,YI3,	1326.58	2651.16	1326.58	1	4.47	01Y41Y41M(31M21M)61M(31M)61M	507.75	28	104.17
Q8NHP8_RNQSLVQDMDSMVR_2_HexNAc(2)Hex(7)	27433	Q8NHP8	RNQSLVQDMDSMVR	N2GlcNAc	3	N2H7F0S0	3	N,10;	10	465	2	-0.88343	60.67	32.18	1074.12	C124H212N25O69S2	1	131.28	18_adg_human_15ug_TR3_240615_f	YI3,ZI3,YI3,	1074.11	3219.33	1074.12	1	17.47	01Y41Y41M(31M)61M(31M21M)61M21M	507.62	30	107.69
A8K2U0_HSNGSYSAFGER_3_HexNAc(2)Hex(5)	14876	A8K2U0	HSNGSYSAFGER	N3GlcNAc	3	N2H5F0S0	18	N,12;	12	1020	3	0.472558	57.65	27.59	843.671	C101H155N20O55	1	69.9	20_Oesophagus_human_15ug_TR1_240618_f	BI1,BII1,BIII1,BI2,45AI2,YI2,YI3,02XI1,ZI1,YI1,02XI2,ZI2,YI2,BI4,YI3,YI4,YII4,YIII3,02XI1,ZI1,YI1,YI2,	843.671	2527.99	843.671	1	0	01Y41Y41M(31M)61M(31M)61M	507.61	28	118.18
P16444_ANLSQVADHLDHIK_2_HexNAc(4)Hex(5)Fuc(1)	26374	P16444	ANLSQVADHLDHIK	N2GlcNAc	3	N4H5F1S0	0	N,9;	9	279	2	2.33876	40.14	25.28	1110.83	C135H222N25O71	1	133.95	12_Tetis_human_8ug_TR3_231109_f		1110.83	3329.45	1110.82	2	0.52	01Y41Y41M(31M41Y(31F)41L)61M61Y41L	507.45	32	115.38
P02751_HEEGHMLNCTCFGQGR_8_HexNAc(2)Hex(5)	16848	P02751	HEEGHMLNCTCFGQGR	N8GlcNAcC9CamC11Cam	3	N2H5F0S0	15	N,5;	5	542	8	-1.12139	46.17	25.75	1051.08	C123H194N29O61S3	1	82.54	15_bigintes_human_15ug_TR2_240616_f	BI1,BII1,BIII1,BI2,02XI1,YI1,YI2,YI3,YI4,YII4,YIII3,02XI1,ZI1,YI1,ZI2,YI2,YI3,YI4,YII4,YIII3,YI1,	1050.74	3149.21	1050.74	1	0	01Y41Y41M(31M)61M(31M)61M	507.13	26	83.33
P51884_LHINHNNLTESVGPLPK_7_HexNAc(4)Hex(5)Fuc(1)NeuAc(2)	24519	P51884	LHINHNNLTESVGPLPK	N7GlcNAc	3	N4H5F1S2	1	N,35;	35	127	7	2.19516	37.28	21.13	1412.63	C173H282N31O90	1	115.45	17_Prostate_human_15ug_TR3_240619_f	YII3,	1412.62	4233.84	1412.62	2	8.94	01Y41Y41M(31M21Y(31F)41L32S)61M61Y41L32S	505.91	36	106.25
P06280_HMSLALNR_7_HexNAc(2)Hex(5)	17334	P06280	HMSLALNR	N7GlcNAc	2	N2H5F0S0	22	N,5;	5	192	7	-0.50819	60.46	19.24	1079.97	C85H145N16O46S1	1	82.15	18_adg_human_15ug_TR3_240615_f	BI1,BII1,BIII1,BI2,02XI1,ZI1,YI1,ZI2,YI2,04XI3,ZI3,YI3,ZI4,ZII4,ZIII3,YI4,YII4,YIII3,BI4,02XI1,MH,ZI1,YI1,24XI2,ZI2,YI2,YI3,YI4,YII4,YIII3,	1079.97	2157.92	1079.97	1	0	01Y41Y41M(31M)61M(31M)61M	505.38	18	100
P01859_EEQFNSTFR_5_HexNAc(4)Hex(3)	19319	P01859	EEQFNSTFR	N5GlcNAc	2	N4H3F0S0	0	N,2;	2	176	5	1.6947	65.93	20.84	1229.01	C100H155N18O53	1	90.12	21_Bladder_human_15ug_TR2_240619_f		1229.01	2456	1229	1	44.21	01Y41Y41M(31M41Y)61M61Y	505.2	18	87.5
Q15165_HTNMNLTQLK_5_HexNAc(2)Hex(7)	18065	Q15165	HTNMNLTQLK	N5GlcNAc	3	N2H7F0S0	4	N,16;	16	254	5	0.788005	47.98	18.27	914.39	C108H183N18O61S1	1	85.77	18_adg_human_15ug_TR1_240615_f	BI2,BI2,ZI3,YI3,	914.39	2740.15	914.389	1	9.22	01Y41Y41M(31M21M)61M(31M21M)61M	504.98	25	127.78
P11279_GHTLTLNFTR_7_HexNAc(3)Hex(5)NeuAc(1)	23736	P11279	GHTLTLNFTR	N7GlcNAc	3	N3H5F0S1	12	N,5;	5	103	7	1.04758	53.16	25.96	957.747	C116H189N20O63	1	113.35	18_adg_human_15ug_TR1_240615_f	02AII2,BII2,BII1,CII1,35AII4,BII2,35AII3,BII3,35AII4,ZII5,YII5,YII6,	957.747	2870.22	957.746	1	49.42	01Y41Y41M(31M41Y41L32S)61M61M	504.53	19	88.89
P55290_INNTHALVSLLQNLNK_2_HexNAc(3)Hex(6)NeuAc(1)	36017	P55290	INNTHALVSLLQNLNK	N2GlcNAc	3	N3H6F0S1	26	N,10;	10	638	2	2.53952	48.87	25.1	1222.56	C149H251N28O77	1	179.05	13_Heart_human_10ug_TR3_231111_f	03AI2,02AIII2,01AI1,01AII1,BIII2,BI1,BII1,BI2,BIII1,14AIII3,CIII1,35AIII4,BIII2,35AIII3,BIII3,35AIII4,BIII4,02XI1,ZI1,YI1,ZI2,YI2,YIII3,YIII4,YIII5,YIII6,ZI1,YI1,	1222.56	3664.66	1222.56	1	0	01Y41Y41M(31M41Y41L32S)61M(31M)61M	504.44	36	113.33
P07339_YYKGSLSYLNVTR_10_HexNAc(2)Hex(7)	23651	P07339	YYKGSLSYLNVTR	N10GlcNAc	3	N2H7F0S0	3	N,8;	8	263	10	0.0211116	44.98	16.35	1035.79	C130H207N20O66	1	112.95	18_adg_human_15ug_TR1_240615_f	45AI3,YI3,YI3,	1035.79	3104.35	1035.79	1	4.44	01Y41Y41M(31M)61M(31M21M)61M21M	503.99	26	100
P10253_GVFITNETGQPLIGK_6_HexNAc(2)Hex(6)	25712	P10253	GVFITNETGQPLIGK	N6GlcNAc	3	N2H6F0S0	3	N,15;	15	470	6	1.7315	41.58	17.75	985.452	C123H203N20O62	1	122.96	18_adg_human_15ug_TR1_240615_f	BI2,YI3,YI3,	985.119	2952.33	985.118	1	6.02	01Y41Y41M(31M)61M(31M21M)61M	503.79	36	117.86
P05164_SCPACPGSNITIR_9_HexNAc(2)Hex(6)	19303	P05164	SCPACPGSNITIR	C2CamC5CamN9GlcNAc	2	N2H6F0S0	6	N,5;	5	323	9	3.26886	60.85	23.22	1406.58	C109H184N21O60S2	1	97.01	11_Spleen_human_15ug_TR3_231108_f	45AI3,BI2,03AI3,ZI3,YI3,YI3,	1406.58	2811.14	1406.58	1	9.55	01Y41Y41M(31M21M)61M(31M)61M	502.69	26	95.83
Q86TD4_TNVSKFDLPNR_2_HexNAc(2)Hex(8)	21533	Q86TD4	TNVSKFDLPNR	N2GlcNAc	3	N2H8F0S0	3	N,7;	7	389	2	3.07537	54.04	22.6	998.763	C120H198N19O68	1	111.03	13_Heart_human_10ug_TR1_231111_f	YI3,YI3,YI3,	998.763	2993.26	998.76	1	14.55	01Y41Y41M(31M21M)61M(31M21M)61M21M	501.88	27	115
Q13061_KESLQLHNVTK_8_HexNAc(2)Hex(6)	17019	Q13061	KESLQLHNVTK	N8GlcNAc	3	N2H6F0S0	4	N,18;	18	647	8	1.78263	54.83	26.83	892.742	C108H184N19O58	1	83.86	14_Muscle_human_10ug_TR2_231113_f	BI2,YI3,ZI3,YI3,	892.742	2675.2	892.74	1	10.08	01Y41Y41M(31M21M)61M(31M)61M	499.47	28	130
P14625_HNNDTQHIWESDSNEFSVIADPR_3_HexNAc(2)Hex(5)	28597	P14625	HNNDTQHIWESDSNEFSVIADPR	N3GlcNAc	3	N2H5F0S0	18	N,10;	10	217	3	0.648386	56.23	20.31	1310.55	C161H244N37O77	1	138.56	16_Pancreas_human_15ug_TR3_240614_f	BI1,BII1,BIII1,BI2,45AI2,02AI2,BI2,CI2,ZI1,YI1,BI4,YI2,YI3,YI4,YII4,YIII3,MH,02XI1,ZI1,YI1,YI2,YI3,	1310.55	3927.63	1310.55	1	0	01Y41Y41M(31M)61M(31M)61M	498.87	30	68.18
P43897_DQPSAYSKGFLNSSELSGLPAGPDR_12_HexNAc(2)Hex(5)	20798	P43897	DQPSAYSKGFLNSSELSGLPAGPDR	N12GlcNAc	3	N2H5F0S0	19	N,1;	1	165	12	2.59573	31.27	11.57	1270.9	C158H250N33O75	1	98.99	04_Stomach_human_15ug_TR2_240614_f	BI1,BII1,BIII1,BI2,04AI3,BI2,CI2,ZI1,YI1,ZI2,YI2,BI4,YI3,YI4,YII4,YIII3,14XI1,02XI1,ZI1,YI1,YI2,YI3,YI4,YII4,YIII3,	1271.24	3809.68	1271.23	1	0	01Y41Y41M(31M)61M(31M)61M	498.65	6	12.5
P07585_LGLSFNSISAVDNGSLANTPHLR_13_HexNAc(4)Hex(5)Fuc(1)NeuAc(1)	33722	P07585	LGLSFNSISAVDNGSLANTPHLR	N13GlcNAc	3	N4H5F1S1	0	N,6;	6	262	13	1.45034	42.29	22.58	1482.33	C182H297N36O91	1	159.83	17_Prostate_human_15ug_TR2_240619_f		1482.33	4442.97	1482.33	1	10.91	01Y(61F)41Y41M(31M41Y41L)61M61Y41L32S	495.58	37	77.27
P11279_GHTLTLNFTR_7_HexNAc(3)Hex(6)NeuAc(1)	23968	P11279	GHTLTLNFTR	N7GlcNAc	3	N3H6F0S1	11	N,5;	5	103	7	0.11262	51.5	24.4	1011.76	C122H199N20O68	1	114.47	18_adg_human_15ug_TR3_240615_f	02AIII2,BIII2,BIII1,CIII1,35AIII4,BIII2,35AIII3,BIII3,35AIII4,YIII5,YIII6,	1011.76	3032.27	1011.76	1	34.21	01Y41Y41M(31M41Y41L32S)61M(31M)61M	495.51	21	94.44
P02675_GTAGNALMDGASQLMGENR_18_HexNAc(4)Hex(6)Fuc(1)NeuAc(1)	32267	P02675	GTAGNALMDGASQLMGENR	N18GlcNAc	3	N4H6F1S1	0	N,13;	13	394	18	4.82488	41.09	24.04	1372.9	C159H265N30O91S2	1	152.91	21_Bladder_human_15ug_TR3_240619_f		1372.9	4114.65	1372.89	1	3.85	01Y41Y41M(31M(21Y(31F)41L32S)41Y41L)61M61M	493.99	39	100
Q14108_TMVFPVMYLNESVHIDKETASR_10_HexNAc(2)Hex(9)	33628	Q14108	TMVFPVMYLNESVHIDKETASR	N10GlcNAc	4	N2H9F0S0	1	N,4;	4	412	10	1.71065	38.36	18.75	1109.23	C183H296N31O90S2	1	161.75	18_adg_human_15ug_TR3_240615_f	25AI2,25AIII3,	1109.23	4431.9	1109.23	1	2.26	01Y41Y41M(31M21M21M31G31G)61M(31M)61M	493.87	25	57.14
Q14108_CNMINGTDGDSFHPLITK_5_HexNAc(2)Hex(9)	24491	Q14108	CNMINGTDGDSFHPLITK	C1CamN5GlcNAc	3	N2H9F0S0	1	N,2;	2	249	5	-0.280479	44.5	23.14	1295.86	C155H251N26O84S2	1	117.01	18_adg_human_15ug_TR1_240615_f	35AI3,	1296.19	3884.56	1296.19	2	2.25	01Y41Y41M(31M21M21M31G31G)61M(31M)61M	492.98	27	73.53
P54289_VLKDAVNNITAK_8_HexNAc(2)Hex(8)	17118	P54289	VLKDAVNNITAK	N8GlcNAc	3	N2H8F0S0	1	N,18;	18	324	8	1.65645	51.12	21.86	997.119	C120H207N18O68	1	91.08	14_Muscle_human_10ug_TR3_231113_f	02AIII2,	997.117	2988.33	997.116	2	0	01Y41Y41M(31M21M21M31G)61M(31M)61M	492.58	33	131.82
P12109_NVTAQICIDK_1_HexNAc(2)Hex(5)	20129	P12109	NVTAQICIDK	N1GlcNAcC7Cam	2	N2H5F0S0	15	N,7;	7	804	1	1.59146	39.3	14.71	1190.01	C94H161N16O52S1	1	93.76	21_Bladder_human_15ug_TR3_240619_f	BI1,BII1,BIII1,CI1,CII1,CIII1,BI2,YI1,02XI2,YI2,ZI3,YI3,BI4,YI4,YII4,YIII3,02XI1,ZI1,YI1,YI2,YI3,	1190.02	2378.02	1190.01	1	0	01Y41Y41M(31M)61M(31M)61M	492.33	27	133.33
Q86UK5_GELKPEAAKMLLQNYSK_14_HexNAc(5)Hex(5)NeuAc(1)	36769	Q86UK5	GELKPEAAKMLLQNYSK	N14GlcNAc	4	N5H5F0S1	0	N,1;	1	565	14	-1.02898	60.41	22.04	1010.2	C166H275N28O84S1	1	176.21	21_Bladder_human_15ug_TR2_240619_f		1010.45	4036.78	1010.45	1	42.18	01Y41Y41M(31M41Y)61M61Y41L31Y41L32S	491.56	6	15.63
A8K2U0_THHWNITAVK_5_HexNAc(2)Hex(7)	18155	A8K2U0	THHWNITAVK	N5GlcNAc	3	N2H7F0S0	4	N,12;	12	857	5	-1.08434	45.9	19.39	916.727	C113H180N19O59	2	85.59	20_Oesophagus_human_15ug_TR1_240618_f	04AI4,YI3,YI3,YI3,	916.727	2747.17	916.728	1	7.13	01Y41Y41M(31M)61M(31M21M)61M21M	491.53	24	116.67
P16444_ANLSQVADHLDHIK_2_HexNAc(4)Hex(5)	27025	P16444	ANLSQVADHLDHIK	N2GlcNAc	4	N4H5F0S0	0	N,11;	11	279	2	2.27101	30.36	25.69	796.857	C129H212N25O67	1	137.19	12_Tetis_human_8ug_TR3_231109_f		796.857	3183.4	796.855	1	11.9	01Y41Y41M(31M41Y41L)61M61Y41L	490.83	35	126.92
P51884_KLHINHNNLTESVGPLPK_8_HexNAc(4)Hex(5)Fuc(1)NeuAc(1)	20940	P51884	KLHINHNNLTESVGPLPK	N8GlcNAc	3	N4H5F1S1	0	N,6;	6	127	8	1.02471	43.92	25.36	1358.12	C168H277N32O83	1	96.96	15_bigintes_human_15ug_TR1_240616_f		1358.29	4070.84	1358.29	1	6.92	01Y(61F)41Y41M(31M41Y41L)61M61Y41L32S	489.83	29	82.35
P56199_NTTFNVESTK_1_HexNAc(2)Hex(6)	14075	P56199	NTTFNVESTK	N1GlcNAc	2	N2H6F0S0	3	N,6;	6	418	1	1.36566	44.84	17.62	1260.52	C100H164N15O59	2	66.56	18_adg_human_15ug_TR1_240615_f	BI2,YI3,YI3,	1260.52	2519.03	1260.52	1	0	01Y41Y41M(31M21M)61M(31M)61M	488.98	24	116.67
P69849_LENITTGTYTIHAQK_3_HexNAc(2)Hex(7)	19998	P69849	LENITTGTYTIHAQK	N3GlcNAc	3	N2H7F0S0	2	N,6;	6	369	3	0.26286	42.94	19.79	1077.81	C132H217N22O70	1	95.27	18_adg_human_15ug_TR1_240615_f	YI3,YI3,	1077.81	3230.41	1077.81	1	4.51	01Y41Y41M(31M)61M(31M21M)61M21M	488.73	31	103.57
P16671_RNYIVPILWLNETGTIGDEK_11_HexNAc(2)Hex(9)	38356	P16671	RNYIVPILWLNETGTIGDEK	N11GlcNAc	3	N2H9F0S0	0	N,18;	18	417	11	2.43926	50.58	22.92	1399.96	C176H284N29O87	1	184.14	10_Fat_human_15ug_TR3_231011_f		1399.97	4195.87	1399.96	2	8.96	01Y41Y41M(31M21M21M31G)61M(31M21M)61M	488.15	32	84.21
Q9Y4L1_LSALDNLLNHSSMFLK_9_HexNAc(2)Hex(7)	37492	Q9Y4L1	LSALDNLLNHSSMFLK	N9GlcNAc	3	N2H7F0S0	3	N,16;	16	830	9	1.52924	41.02	20.2	1115.83	C138H228N23O69S1	1	181.06	18_adg_human_15ug_TR3_240615_f	BI2,YI3,YI3,	1115.5	3343.48	1115.5	1	4.53	01Y41Y41M(31M21M)61M(31M21M)61M	486.99	32	100
Q7Z7H5_FTFTSHTPGDHQICLHSNSTR_18_HexNAc(2)Hex(6)	20868	Q7Z7H5	FTFTSHTPGDHQICLHSNSTR	C14CamN18GlcNAc	5	N2H6F0S0	4	N,8;	8	117	18	-1.25561	32.17	17.56	765.526	C156H242N35O74S1	1	99.48	18_adg_human_15ug_TR2_240615_f	BI2,CI2,YI3,YI3,	765.526	3821.6	765.527	1	2.22	01Y41Y41M(31M21M)61M(31M)61M	486.66	22	55
P11047_LLNNLTSIK_4_HexNAc(2)Hex(5)	23971	P11047	LLNNLTSIK	N4GlcNAc	2	N2H5F0S0	17	N,6;	6	650	4	2.91562	57.06	17.29	1117.03	C91H159N14O49	1	115.78	10_Fat_human_15ug_TR3_231011_f	BI1,BII1,BIII1,CI1,CII1,CIII1,BI2,02XI1,ZI1,YI1,ZI2,YI2,ZI3,YI3,YI4,YII4,YIII3,02XI1,ZI1,YI1,ZI2,YI2,YI3,	1117.03	2232.04	1117.02	1	0	01Y41Y41M(31M)61M(31M)61M	486.11	22	118.75
P16444_ANLSQVADHLDHIK_2_HexNAc(4)Hex(5)NeuAc(1)	27058	P16444	ANLSQVADHLDHIK	N2GlcNAc	3	N4H5F0S1	2	N,7;	7	279	2	2.75843	56.46	30.97	1159.51	C140H229N26O75	1	137.61	12_Tetis_human_8ug_TR1_231109_f	CII3,35AI5,	1159.17	3474.49	1159.17	1	20.25	01Y41Y41M(31M41Y41L)61M61Y41L32S	485.89	29	103.85
P01877_TPLTANITK_6_HexNAc(2)Hex(9)	14462	P01877	TPLTANITK	N6GlcNAc	2	N2H9F0S0	0	N,10;	10	205	6	-0.876082	57.21	20.89	1412.6	C112H192N13O69	1	71.57	15_bigintes_human_15ug_TR2_240616_f		1412.6	2823.19	1412.6	1	7.11	01Y41Y41M(31M21M21M31G)61M(31M21M)61M	484.64	25	137.5
P11279_GHTLTLNFTR_7_HexNAc(2)Hex(5)	23128	P11279	GHTLTLNFTR	N7GlcNAc	3	N2H5F0S0	20	N,10;	10	103	7	1.29475	55.32	18.55	793.022	C97H159N18O50	1	110.43	18_adg_human_15ug_TR1_240615_f	BI1,BII1,BIII1,BI2,35AI2,04AI3,YI1,ZI2,YI2,02XI1,YI3,35XI1,ZI1,YI1,ZI2,YI2,YI3,YI4,YII4,YIII3,02XI1,ZI1,YI1,YI2,	793.022	2376.05	793.021	1	0	01Y41Y41M(31M)61M(31M)61M	484.32	23	116.67
P07602_TNSTFVQALVEHVK_2_HexNAc(2)Hex(3)Fuc(1)	31805	P07602	TNSTFVQALVEHVK	N2GlcNAc	3	N2H3F1S0	11	N,9;	9	215	2	-0.102752	21.13	16.37	871.411	C110H180N21O51	1	152.85	18_adg_human_15ug_TR2_240615_f	BI1,BII1,BI2,25AI2,BI3,02XI1,ZI1,YI1,YI2,YI3,YII3,02XI1,YI1,	871.411	2611.21	871.411	1	0	01Y(61F)41Y41M(31M)61M	484.25	34	123.08
Q07954_WTGHNVTVVQR_5_HexNAc(2)Hex(5)	15155	Q07954	WTGHNVTVVQR	N5GlcNAc	3	N2H5F0S0	21	N,12;	12	1511	5	-2.50234	53.84	20.46	838.706	C103H166N21O51	1	78.48	human_brain_14ug_TR2_0703_f	BI1,BII1,BIII1,BI2,03AI2,CI2,04AI3,YI1,YI2,15XI1,YI3,02XI1,YI1,02XI2,ZI2,YI2,ZI3,YI3,YI4,YII4,YIII3,02XI1,ZI1,YI1,YI2,	838.705	2513.1	838.707	1	0	01Y41Y41M(31M)61M(31M)61M	483.96	25	110
P55083_FNGSVSFFR_2_HexNAc(2)Hex(5)	28529	P55083	FNGSVSFFR	N2GlcNAc	2	N2H5F0S0	21	N,3;	3	87	2	2.0328	74.63	22.9	1139.48	C96H146N15O48	1	145.06	12_Tetis_human_8ug_TR2_231109_f	BI1,BII1,BIII1,25AI4,BI2,02XI1,ZI1,YI1,02XI2,ZI2,YI2,ZI3,YI3,BI4,YI4,YII4,YIII3,02XI1,34XI1,ZI1,YI1,02XI2,ZI2,YI2,YI3,	1139.48	2276.94	1139.48	1	0	01Y41Y41M(31M)61M(31M)61M	483.86	21	112.5
P02751_HEEGHMLNCTCFGQGR_8_HexNAc(4)Hex(3)	17651	P02751	HEEGHMLNCTCFGQGR	N8GlcNAcC9CamC11Cam	3	N4H3F0S0	0	N,5;	5	542	8	1.32772	49.44	26.93	1078.76	C127H200N31O61S3	1	81.74	15_bigintes_human_15ug_TR1_240616_f		1078.1	3231.27	1078.09	1	57.46	01Y41Y41M(31M41Y)61M61Y	483.42	25	80
Q9Y4L1_VFGSQNLTTVK_6_HexNAc(4)Hex(3)	20454	Q9Y4L1	VFGSQNLTTVK	N6GlcNAc	2	N4H3F0S0	0	N,4;	4	515	6	0.818488	58.07	19.72	1247.07	C103H171N18O52	1	97.89	16_Pancreas_human_15ug_TR1_240614_f		1247.07	2492.13	1247.07	1	37.3	01Y41Y41M(31M41Y)61M61Y	482.69	23	100
P01859_EEQFNSTFR_5_HexNAc(5)Hex(3)Fuc(1)	19268	P01859	EEQFNSTFR	N5GlcNAc	2	N5H3F1S0	0	N,3;	3	176	5	1.18776	56.64	27.03	1403.58	C114H178N19O62	1	89.58	21_Bladder_human_15ug_TR3_240619_f		1403.57	2805.14	1403.57	1	4.73	01Y41Y41M(31M41Y)61M(21Y31F)61Y	482.58	19	100
P01876_LSLHRPALEDLLLGSEANLTCTLTGLR_18_HexNAc(2)Hex(9)	42401	P01876	LSLHRPALEDLLLGSEANLTCTLTGLR	N18GlcNAcC21Cam	4	N2H9F0S0	0	N,5;	5	144	18	1.12592	35.09	19.92	1208.57	C198H336N39O96S1	1	193.27	15_bigintes_human_15ug_TR1_240616_f		1208.32	4828.23	1208.32	1	10.59	01Y41Y41M(31M21M21M31G)61M(31M21M)61M	482.45	32	61.54
Q9NP98_SFNRTAMPYGGYEK_3_HexNAc(2)Hex(6)	24738	Q9NP98	SFNRTAMPYGGYEK	N3GlcNAc	3	N2H6F0S0	5	N,0;	0	222	3	3.86078	39.28	16.02	1000.75	C124H192N21O62S1	1	119.82	02_RE_Liver_human_15ug_TR2_240613_f	CI2,BI2,YI3,ZI3,YI3,	1000.75	2999.22	1000.75	1	24.46	01Y41Y41M(31M)61M(31M21M)61M	482.39	8	19.23
P00450_EHEGAIYPDNTTDFQR_10_HexNAc(4)Hex(5)NeuAc(2)	21788	P00450	EHEGAIYPDNTTDFQR	N10GlcNAc	3	N4H5F0S2	0	N,6;	6	138	10	1.07574	43.69	27.88	1367.21	C165H254N29O91	1	101.87	21_Bladder_human_15ug_TR3_240619_f		1367.21	4097.61	1367.21	2	56.13	01Y41Y41M(31M)61M(21Y41L32S)61Y41L32S	482.32	27	80
P51884_KLHINHNNLTESVGPLPK_8_HexNAc(5)Hex(6)Fuc(1)NeuAc(1)	20099	P51884	KLHINHNNLTESVGPLPK	N8GlcNAc	3	N5H6F1S1	0	N,1;	1	127	8	0.823069	48.4	32.69	1480.34	C182H300N33O93	1	97.6	15_bigintes_human_15ug_TR3_240616_f		1480	4435.98	1480	1	7.04	01Y41Y41M(31M41Y41L)61M61Y(31F)41L31Y41L32S	482.3	23	61.76
Q96JJ7_LVALAVIDEKNTSVEHTR_11_HexNAc(2)Hex(6)	22925	Q96JJ7	LVALAVIDEKNTSVEHTR	N11GlcNAc	3	N2H6F0S0	4	N,7;	7	258	11	2.38924	53.11	23.58	1125.53	C138H234N27O69	1	109.49	18_adg_human_15ug_TR2_240615_f	BI2,BI2,YI3,YI3,	1125.53	3373.56	1125.53	1	7.63	01Y41Y41M(31M21M)61M(31M)61M	482.14	26	73.53
P21810_LLQVVYLHSNNITK_11_HexNAc(4)Hex(5)Fuc(1)NeuAc(2)	27977	P21810	LLQVVYLHSNNITK	N11GlcNAc	3	N4H5F1S2	2	N,8;	8	311	11	3.05565	34.13	20.77	1332.27	C165H271N26O86	1	131.13	21_Bladder_human_15ug_TR1_240619_f	YI3,YI3,	1332.27	3992.76	1332.26	2	7.03	01Y41Y41M(31M)61M(21Y(31F)41L32S)61Y41L32S	481.26	30	107.69
Q16853_YLYLASNHSNK_7_HexNAc(4)Hex(5)Fuc(1)NeuAc(1)	18463	Q16853	YLYLASNHSNK	N7GlcNAc	3	N4H5F1S1	0	N,15;	15	592	7	1.09052	40.32	22.98	1124.47	C138H218N21O75	1	90.2	10_Fat_human_15ug_TR2_231011_f		1124.14	3369.39	1124.14	2	2.19	01Y41Y41M(31M)61M(21Y(31F)41L32S)61Y41L	480.48	26	115
Q96HE7_WGHNITEFQQR_4_HexNAc(2)Hex(7)	21543	Q96HE7	WGHNITEFQQR	N4GlcNAc	3	N2H7F0S0	5	N,8;	8	280	4	-0.632043	52.87	20.7	986.744	C121H187N22O63	1	101.2	20_Oesophagus_human_15ug_TR3_240618_f	CI2,BI2,YI3,ZI3,YI3,	986.409	2956.21	986.41	1	4.57	01Y41Y41M(31M21M)61M(31M21M)61M	479.65	24	110
P02675_YRGTAGNALMDGASQLMGENR_20_HexNAc(4)Hex(5)NeuAc(1)	28404	P02675	YRGTAGNALMDGASQLMGENR	N20GlcNAc	3	N4H5F0S1	2	N,5;	5	394	20	0.748308	64.82	29.65	1376.58	C162H266N35O85S2	1	136.81	15_bigintes_human_15ug_TR2_240616_f	03AI5,35AI5,	1376.57	4125.7	1376.57	1	36.96	01Y41Y41M(31M41Y41L)61M61Y41L32S	479.19	23	57.5
P02675_GTAGNALMDGASQLMGENR_18_HexNAc(4)Hex(5)Fuc(2)	30524	P02675	GTAGNALMDGASQLMGENR	N18GlcNAc	4	N4H5F2S0	0	N,12;	12	394	18	-3.18575	28.6	24.46	952.642	C148H248N29O82S2	1	154.91	12_Tetis_human_8ug_TR2_231109_f		953.143	3807.56	953.146	2	2.97	01Y41Y41M(31M41Y41L)61M21Y(31F)41L21F	478.59	40	105.56
P02751_HEEGHMLNCTCFGQGR_8_HexNAc(4)Hex(4)	16758	P02751	HEEGHMLNCTCFGQGR	N8GlcNAcC9CamC11Cam	4	N4H4F0S0	6	N,3;	3	542	8	1.44393	46.85	26.05	849.338	C133H210N31O66S3	1	82.1	15_bigintes_human_15ug_TR2_240616_f	BI2,04AI3,BI2,YI3,ZI3,YI3,	849.337	3393.32	849.336	1	6.65	01Y41Y41M(31M)61M(21Y41L)61Y	478.37	24	73.33
Q9UHL4_NLSASVIAVTIQGGAHHLDLR_1_HexNAc(2)Hex(6)	32309	Q9UHL4	NLSASVIAVTIQGGAHHLDLR	N1GlcNAc	4	N2H6F0S0	2	N,7;	7	428	1	0.0455252	29.29	19.93	888.673	C146H245N32O69	1	155.35	18_adg_human_15ug_TR2_240615_f	BI2,BI2,	888.673	3550.66	888.673	2	0	01Y41Y41M(31M21M)61M(31M)61M	477.46	36	90
P14625_TDDEVVQREEEAIQLDGLNASQIR_19_HexNAc(2)Hex(5)	30087	P14625	TDDEVVQREEEAIQLDGLNASQIR	N19GlcNAc	3	N2H5F0S0	17	N,8;	8	62	19	1.63913	44.76	22.52	1316.26	C158H263N36O80	1	146.2	16_Pancreas_human_15ug_TR2_240614_f	BI1,BII1,BIII1,BI2,CI3,15AI2,BI2,45AI3,YI1,BI4,ZI2,YI2,YI3,02XI1,24XI1,ZI1,YI1,YI2,YI3,	1316.26	3944.76	1316.26	1	0	01Y41Y41M(31M)61M(31M)61M	477.18	31	67.39
P02750_MFSQNDTR_5_HexNAc(2)Hex(8)	10773	P02750	MFSQNDTR	N5GlcNAc	2	N2H8F0S0	0	N,6;	6	325	5	0.832984	74.74	28.93	1351.52	C104H170N15O65S1	2	50.15	02_RE_Liver_human_15ug_TR2_240613_f		1351.52	2701.02	1351.51	2	0	01Y41Y41M(31M21M21M31G)61M(31M)61M	477.15	20	114.29
P15586_GASNLTWR_4_HexNAc(2)Hex(7)	17038	P15586	GASNLTWR	N4GlcNAc	2	N2H7F0S0	4	N,6;	6	405	4	-0.0213782	74.39	22.91	1223.5	C97H158N15O57	1	80.71	18_adg_human_15ug_TR3_240615_f	04XI3,ZI3,YI3,YI3,	1223.5	2444.99	1223.5	2	10.24	01Y41Y41M(31M)61M(31M21M)61M21M	476.87	20	114.29
P14867_SVAHNMTMPNK_5_HexNAc(2)Hex(6)	13575	P14867	SVAHNMTMPNK	N5GlcNAc	3	N2H6F0S0	4	N,15;	15	138	5	-1.5053	54.09	24.96	870.356	C102H171N18O56S2	1	69.65	human_brain_14ug_TR3_0703_f	BI2,25AI2,ZI3,YI3,	870.356	2608.05	870.357	1	9.63	01Y41Y41M(31M21M)61M(31M)61M	476.71	28	125
Q6RSH7_IIICNHSPR_5_HexNAc(2)Hex(7)	22013	Q6RSH7	IIICNHSPR	C4CamN5GlcNAc	2	N2H7F0S0	6	N,1;	1	60	5	3.5432	60.77	16.5	1326.07	C105H177N18O58S1	1	105.12	18_adg_human_15ug_TR1_240615_f	BI2,BI2,04AI3,ZI3,YI3,YI3,	1326.07	2650.12	1326.06	1	7.49	01Y41Y41M(31M21M)61M(31M21M)61M	476.05	6	25
P02751_RHEEGHMLNCTCFGQGR_9_HexNAc(4)Hex(4)	16467	P02751	RHEEGHMLNCTCFGQGR	N9GlcNAcC10CamC12Cam	4	N4H4F0S0	6	N,2;	2	542	9	1.37317	49.88	28.87	888.361	C139H222N35O67S3	1	76.2	15_bigintes_human_15ug_TR1_240616_f	BI2,04AI3,BI2,YI3,ZI3,YI3,	888.613	3549.42	888.612	2	20.4	01Y41Y41M(31M)61M(21Y41L)61Y	475.44	18	56.25
Q13061_ESLQLHNVTK_7_HexNAc(2)Hex(9)	16326	Q13061	ESLQLHNVTK	N7GlcNAc	2	N2H9F0S0	0	N,15;	15	647	7	1.10025	57.56	23.53	1518.14	C120H202N17O72	1	87.47	14_Muscle_human_10ug_TR3_231113_f		1517.64	3033.27	1517.64	2	0	01Y41Y41M(31M21M21M31G31G)61M(31M)61M	474.33	24	122.22
P23946_YNTSTLHHDIMLLK_2_HexNAc(2)Hex(5)	28620	P23946	YNTSTLHHDIMLLK	N2GlcNAc	4	N2H5F0S0	15	N,10;	10	103	2	1.95644	41.3	17.61	726.33	C121H197N22O57S1	1	134.72	17_Prostate_human_15ug_TR2_240619_f	BI1,BII1,BIII1,BI2,03AI4,03AI2,CI2,02XI1,ZI1,YI1,YI2,02XI1,ZI1,YI1,YI2,YI3,YI1,	726.581	2902.29	726.579	1	0	01Y41Y41M(31M)61M(31M)61M	474.28	34	126.92
P07585_LGLSFNSISAVDNGSLANTPHLR_13_HexNAc(5)Hex(4)Fuc(1)	32594	P07585	LGLSFNSISAVDNGSLANTPHLR	N13GlcNAc	3	N5H4F1S0	0	N,5;	5	262	13	2.21891	45.44	28.43	1398.98	C173H283N36O83	1	155.15	19_Ovarian_human_15ug_TR1_240617_f		1398.98	4192.9	1398.97	2	1.08	01Y41Y41M(31M41Y41L31Y)61M61Y31F	474.2	33	70.45
Q8N6U8_NSSTSTSSSGSR_1_HexNAc(4)Hex(3)Fuc(1)	18460	Q8N6U8	NSSTSTSSSGSR	N1GlcNAc	2	N4H3F1S0	0	N,0;	0	241	1	8.43766	73.73	24.03	1302.03	C97H165N20O62	1	86.07	21_Bladder_human_15ug_TR2_240619_f		1302.03	2602.04	1302.02	1	2.53	01Y41Y41M(31M41Y31F)61M61Y	472.89	8	27.27
P02751_GGNSNGALCHFPFLYNNHNYTDCTSEGRR_19_HexNAc(4)Hex(4)Fuc(1)	26850	P02751	GGNSNGALCHFPFLYNNHNYTDCTSEGRR	C9CamN19GlcNAcC23Cam	5	N4H4F1S0	5	N,0;	0	430	19	-0.478369	32.94	18.36	994.216	C203H307N50O91S2	1	129.28	15_bigintes_human_15ug_TR2_240616_f	45AI3,BI2,BI2,YI3,YI3,	994.214	4965.04	994.215	2	10.71	01Y(61F)41Y41M(31M)61M(21Y41L)61Y	472.38	13	23.21
P23515_SLEVLNLSSNK_6_HexNAc(2)Hex(9)	22131	P23515	SLEVLNLSSNK	N6GlcNAc	2	N2H9F0S0	0	N,16;	16	152	6	-0.0324021	56.49	18.42	1535.15	C121H207N16O74	1	112.24	human_brain_14ug_TR1_0703_f_new		1535.15	3068.29	1535.15	1	4.38	01Y41Y41M(31M21M21M31G)61M(31M21M)61M	472.29	30	130
P51888_NSFNISNLLVLHLSHNR_4_HexNAc(4)Hex(5)	36903	P51888	NSFNISNLLVLHLSHNR	N4GlcNAc	4	N4H5F0S0	4	N,4;	4	289	4	1.66485	45.35	23.07	901.169	C149H243N32O70	1	174.52	17_Prostate_human_15ug_TR1_240619_f	BI3,YI3,ZI3,YI3,	901.169	3600.64	901.167	1	1.73	01Y41Y41M(31M)61M(21Y41L)61Y41L	472.22	27	75
P56199_NTTFNVESTK_1_HexNAc(2)Hex(5)	15767	P56199	NTTFNVESTK	N1GlcNAc	2	N2H5F0S0	19	N,6;	6	418	1	1.5051	45.41	16.51	1179.5	C94H154N15O54	1	72.52	17_Prostate_human_15ug_TR2_240619_f	01AI1,01AII1,01AIII1,BI1,BII1,BIII1,35AI2,BI2,04AI3,ZI1,YI1,ZI2,YI2,YI3,BI4,YI4,YII4,YIII3,14XI1,02XI1,ZI1,YI1,ZI2,YI2,YI3,	1179.5	2356.98	1179.49	1	0	01Y41Y41M(31M)61M(31M)61M	472.19	24	116.67
P01877_HYTNSSQDVTVPCR_4_HexNAc(5)Hex(5)Fuc(1)	14942	P01877	HYTNSSQDVTVPCR	N4GlcNAcC13Cam	3	N5H5F1S0	0	N,15;	15	92	4	1.02998	51.27	29.83	1212.83	C144H232N27O79S1	1	69.04	21_Bladder_human_15ug_TR3_240619_f		1212.83	3635.47	1212.83	2	4.82	01Y41Y41M(31M41Y(31F)41L31Y41L)61M61Y	472.1	27	96.15
P14625_HNNDTQHIWESDSNEFSVIADPR_3_HexNAc(2)Hex(6)	28373	P14625	HNNDTQHIWESDSNEFSVIADPR	N3GlcNAc	3	N2H6F0S0	5	N,9;	9	217	3	-1.01673	62.86	26.24	1364.23	C167H254N37O82	1	137.81	02_RE_Liver_human_15ug_TR2_240613_f	BI2,BI2,CI2,YI3,YI3,	1364.57	4089.68	1364.57	1	7.44	01Y41Y41M(31M21M)61M(31M)61M	471.62	30	68.18
P23515_SLWNMSAANNNIK_4_HexNAc(2)Hex(8)	23946	P23515	SLWNMSAANNNIK	N4GlcNAc	2	N2H8F0S0	1	N,14;	14	103	4	0.858795	47.56	19.25	1583.65	C126H206N21O70S1	1	118.93	human_brain_14ug_TR3_0703_f	02AIII2,	1583.65	3165.29	1583.65	2	0	01Y41Y41M(31M21M21M31G)61M(31M)61M	470.66	34	129.17
Q16853_YLYLASNHSNK_7_HexNAc(5)Hex(5)Fuc(1)NeuAc(1)	18616	Q16853	YLYLASNHSNK	N7GlcNAc	3	N5H5F1S1	0	N,15;	15	592	7	0.917124	53.42	22.36	1191.83	C146H231N22O80	1	91.07	10_Fat_human_15ug_TR3_231011_f		1191.83	3572.47	1191.83	1	5	01Y41Y41M(31M41Y)61M61Y(31F)41L31Y41L32S	470.21	28	115
Q13637_VHLPNGSPIPAVLLANK_5_HexNAc(2)Hex(8)	25616	Q13637	VHLPNGSPIPAVLLANK	N5GlcNAc	3	N2H8F0S0	0	N,1;	1	132	5	-0.290614	45.37	18.48	1148.54	C144H241N24O71	1	124.01	02_RE_Liver_human_15ug_TR1_240613_f		1148.54	3442.6	1148.54	2	7.65	01Y41Y41M(31M21M21M)61M(31M21M)61M	470.1	7	15.63
P02751_DQCIVDDITYNVNDTFHK_13_HexNAc(2)Hex(9)	29795	P02751	DQCIVDDITYNVNDTFHK	C3CamN13GlcNAc	3	N2H9F0S0	1	N,9;	9	528	13	0.848546	47.64	25.63	1355.22	C164H258N27O89S1	1	144.59	02_RE_Liver_human_15ug_TR1_240613_f	25AI3,	1355.22	4061.62	1355.21	1	13.39	01Y41Y41M(31M21M21M)61M(31M21M)61M21M	470.06	33	91.18
P10253_GVFITNETGQPLIGK_6_HexNAc(2)Hex(7)	25966	P10253	GVFITNETGQPLIGK	N6GlcNAc	2	N2H7F0S0	3	N,9;	9	470	6	0.0247782	41.85	17.89	1558.2	C129H213N20O67	1	124.2	18_adg_human_15ug_TR3_240615_f	BI2,ZI3,YI3,	1558.2	3114.39	1558.2	1	11.13	01Y41Y41M(31M21M)61M(31M21M)61M	469.62	35	114.29
Q07954_NSTTLVMHMK_1_HexNAc(2)Hex(6)	16973	Q07954	NSTTLVMHMK	N1GlcNAc	3	N2H6F0S0	3	N,7;	7	1825	1	-0.444508	45.93	17.24	847.69	C100H171N16O55S2	1	80.61	18_adg_human_15ug_TR1_240615_f	BI2,ZI3,YI3,	847.69	2540.05	847.69	1	4.46	01Y41Y41M(31M21M)61M(31M)61M	469.26	27	133.33
Q96G23_LWLPVNLTWADLEDRDGR_6_HexNAc(2)Hex(8)	38819	Q96G23	LWLPVNLTWADLEDRDGR	N6GlcNAc	3	N2H8F0S0	0	N,1;	1	19	6	3.05589	46.64	18.74	1291.91	C162H256N29O79	2	187.79	18_adg_human_15ug_TR2_240615_f		1291.91	3871.69	1291.9	1	4.97	01Y41Y41M(31M21M21M)61M(31M21M)61M	469.24	20	55.88
P05090_ADGTVNQIEGEATPVNLTEPAKLEVK_16_HexNAc(2)Hex(3)Fuc(1)	27391	P05090	ADGTVNQIEGEATPVNLTEPAKLEVK	N16GlcNAc	3	N2H3F1S0	13	N,7;	7	98	16	0.384069	19.86	14.2	1255.27	C157H262N33O72	1	131.08	18_adg_human_15ug_TR3_240615_f	03AI2,01AI1,01AII1,BI1,BII1,BI2,BI3,YI1,ZI2,YI2,YI3,YII3,MH,02XI1,YI1,YI2,	1255.27	3761.79	1255.27	1	0	01Y(61F)41Y41M(31M)61M	468.87	34	68
Q13637_VHLPNGSPIPAVLLANK_5_HexNAc(2)Hex(9)	25347	Q13637	VHLPNGSPIPAVLLANK	N5GlcNAc	4	N2H9F0S0	0	N,1;	1	132	5	-0.30883	43.83	19.34	902.419	C150H251N24O76	1	122.8	02_RE_Liver_human_15ug_TR2_240613_f		902.169	3604.65	902.169	2	16.88	01Y41Y41M(31M21M21M31G31G)61M(31M)61M	468.13	7	15.63
O43313_SPSNPLQELGNTCQK_11_HexNAc(2)Hex(8)	17677	O43313	SPSNPLQELGNTCQK	N11GlcNAcC13Cam	3	N2H8F0S0	0	N,2;	2	401	11	0.956052	53.03	24.82	1126.47	C132H220N23O76S1	1	84.64	02_RE_Liver_human_15ug_TR1_240613_f		1126.13	3375.38	1126.13	2	8.15	01Y41Y41M(31M21M21M)61M(31M21M)61M	467.32	7	17.86
P50897_NHSIFLADINQER_1_HexNAc(2)Hex(5)	23717	P50897	NHSIFLADINQER	N1GlcNAc	3	N2H5F0S0	17	N,7;	7	197	1	-2.62216	41.7	16.43	925.405	C113H182N23O57	1	113.26	18_adg_human_15ug_TR1_240615_f	BI1,BII1,BIII1,BI2,03AI3,45AI2,03AI2,CI2,YI1,02XI1,ZI1,YI1,ZI2,YI2,ZI3,YI3,02XI1,ZI1,YI1,	925.405	2773.2	925.408	1	0	01Y41Y41M(31M)61M(31M)61M	466.59	28	104.17
P51884_KLHINHNNLTESVGPLPK_8_HexNAc(4)Hex(5)Fuc(1)	19563	P51884	KLHINHNNLTESVGPLPK	N8GlcNAc	4	N4H5F1S0	0	N,4;	4	127	8	0.291777	31.26	25.37	945.944	C157H260N31O75	1	95.19	15_bigintes_human_15ug_TR2_240616_f		946.195	3779.75	946.194	2	14.63	01Y41Y41M(31M41Y(31F)41L)61M61Y41L	466.3	23	64.71
Q13637_VHLPNGSPIPAVLLANK_16_HexNAc(2)Hex(9)	25573	Q13637	VHLPNGSPIPAVLLANK	N16GlcNAc	4	N2H9F0S0	0	N,1;	1	143	16	-0.579445	43.3	19.25	902.419	C150H251N24O76	1	123.8	02_RE_Liver_human_15ug_TR1_240613_f		902.169	3604.65	902.169	1	4.82	01Y41Y41M(31M21M21M31G31G)61M(31M)61M	466.22	7	15.63
P21810_LLQVVYLHSNNITK_11_HexNAc(4)Hex(5)Fuc(1)	26235	P21810	LLQVVYLHSNNITK	N11GlcNAc	3	N4H5F1S0	0	N,7;	7	311	11	1.41432	35.05	23.69	1137.87	C143H237N24O70	1	122.85	17_Prostate_human_15ug_TR1_240619_f		1137.87	3410.57	1137.86	2	2.65	01Y41Y41M(31M41Y(31F)41L)61M61Y41L	466.07	31	107.69
Q9UHL4_RNLSASVIAVTIQGGAHHLDLR_2_HexNAc(2)Hex(6)	29997	Q9UHL4	RNLSASVIAVTIQGGAHHLDLR	N2GlcNAc	4	N2H6F0S0	5	N,10;	10	428	2	0.701051	52.24	20.36	927.95	C152H257N36O70	1	143.79	18_adg_human_15ug_TR3_240615_f	BI2,BI2,YI3,YI3,YI3,	927.699	3706.77	927.698	1	16.94	01Y41Y41M(31M)61M(31M21M)61M	465.74	26	61.9
P12109_NVTAQICIDK_1_HexNAc(2)Hex(6)	19940	P12109	NVTAQICIDK	N1GlcNAcC7Cam	2	N2H6F0S0	3	N,8;	8	804	1	1.63896	43.27	16.69	1271.04	C100H171N16O57S1	1	92.83	21_Bladder_human_15ug_TR3_240619_f	BI2,YI3,YI3,	1271.04	2540.07	1271.04	1	8.66	01Y41Y41M(31M21M)61M(31M)61M	465.41	28	133.33
Q8N264_TQTTPNGSLQARR_6_HexNAc(2)Hex(4)	18381	Q8N264	TQTTPNGSLQARR	N6GlcNAc	3	N2H4F0S0	26	N,0;	0	454	6	5.93401	36.44	12.25	829.386	C97H167N24O51	1	95.61	human_intestine_14ug_TR1_0704_f	BI1,BII1,BII2,01AII2,BII2,BI2,CII2,ZI1,YI1,YI2,13XII3,24XII3,ZII3,YII3,04XI3,13XII4,ZI3,ZII4,YI3,YII4,ZI1,YI1,MH,YI2,13XII3,24XII3,ZII3,YII3,04XI3,13XII4,YI3,YII4,YI1,YI2,	829.051	2484.12	829.046	1	0	01Y41Y41M(31M21M)61M	465.24	7	25
Q9H6B1_AVINHTFGVPLPHR_4_HexNAc(2)Hex(8)	24868	Q9H6B1	AVINHTFGVPLPHR	N4GlcNAc	3	N2H8F0S0	0	N,3;	3	65	4	-1.21297	40.43	16.21	1087.82	C136H219N24O67	1	120.33	02_RE_Liver_human_15ug_TR3_240613_f		1087.82	3260.45	1087.82	1	2.45	01Y41Y41M(31M21M21M)61M(31M21M)61M	464.38	8	23.08
Q99538_DLNETIHYMYK_3_HexNAc(2)Hex(7)	25104	Q99538	DLNETIHYMYK	N3GlcNAc	3	N2H7F0S0	2	N,7;	7	167	3	2.04261	45.04	20	990.073	C122H192N17O65S1	1	119.97	18_adg_human_15ug_TR1_240615_f	45AI3,YI3,	990.073	2967.2	990.071	2	4.49	01Y41Y41M(31M)61M(31M21M)61M21M	464.04	27	125
P07585_IADTNITSIPQGLPPSLTELHLDGNK_5_HexNAc(3)Hex(4)	34557	P07585	IADTNITSIPQGLPPSLTELHLDGNK	N5GlcNAc	3	N3H4F0S0	5	N,4;	4	211	5	2.81457	35.08	20.16	1335.31	C168H278N35O76	1	164.26	17_Prostate_human_15ug_TR3_240619_f	BI3,CI3,YI3,ZI3,YI3,	1335.31	4001.9	1335.31	1	28.72	01Y41Y41M(31M)61M61Y41L	463.88	34	66
P35555_CDSGFALDSEERNCTDIDECR_13_HexNAc(2)Hex(6)	22544	P35555	CDSGFALDSEERNCTDIDECR	C1CamN13GlcNAcC14CamC20Cam	3	N2H6F0S0	6	N,2;	2	1067	13	0.389231	46.03	22.49	1310.5	C150H240N33O83S3	1	106.35	20_Oesophagus_human_15ug_TR1_240618_f	BI2,25AI2,BI2,YI3,ZI3,YI3,	1310.5	3927.47	1310.5	1	12.14	01Y41Y41M(31M21M)61M(31M)61M	463.73	20	50
P15586_TPMTNSSIQFLDNAFR_5_HexNAc(2)Hex(7)	33689	P15586	TPMTNSSIQFLDNAFR	N5GlcNAc	3	N2H7F0S0	5	N,21;	21	279	5	3.67432	39.79	16.64	1128.82	C138H221N24O71S1	2	162.02	18_adg_human_15ug_TR1_240615_f	BI2,BIII3,25AI2,12AIII3,BI2,BIII3,YI3,YIII3,	1128.48	3382.41	1128.48	2	0	01Y41Y41M(31M21M21M)61M(31M)61M	463.15	34	106.67
Q8NFQ8_HLNASNPTEPATIIFTAAR_3_HexNAc(2)Hex(8)	29643	Q8NFQ8	HLNASNPTEPATIIFTAAR	N3GlcNAc	3	N2H8F0S0	0	N,10;	10	286	3	-2.97468	41.17	15.53	1243.89	C153H249N28O78	1	142.07	18_adg_human_15ug_TR3_240615_f		1243.21	3726.64	1243.22	1	2.02	01Y41Y41M(31M21M21M)61M(31M21M)61M	462.45	35	94.44
Q14108_TMVFPVMYLNESVHIDK_10_HexNAc(2)Hex(9)	35138	Q14108	TMVFPVMYLNESVHIDK	N10GlcNAc	3	N2H9F0S0	0	N,7;	7	412	10	2.71919	38.07	16.89	1297.22	C162H260N23O81S2	1	169.34	18_adg_human_15ug_TR1_240615_f		1297.22	3887.64	1297.22	1	6.25	01Y41Y41M(31M21M21M31G)61M(31M21M)61M	461.71	31	90.63
P29622_TTPKDFYVDENTTVR_11_HexNAc(4)Hex(3)	17126	P29622	TTPKDFYVDENTTVR	N11GlcNAc	3	N4H3F0S0	0	N,1;	1	238	11	3.6675	52.06	21.41	1029.12	C128H203N24O63	1	79.55	21_Bladder_human_15ug_TR3_240619_f		1029.12	3084.34	1029.12	1	78.39	01Y41Y41M(31M41Y)61M61Y	461.13	6	14.29
P51888_NSFNISNLLVLHLSHNR_4_HexNAc(4)Hex(5)NeuAc(1)	37626	P51888	NSFNISNLLVLHLSHNR	N4GlcNAc	3	N4H5F0S1	0	N,2;	2	289	4	2.38009	59.97	26.78	1298.59	C160H260N33O78	1	179.55	17_Prostate_human_15ug_TR3_240619_f		1298.59	3891.74	1298.59	1	1.94	01Y41Y41M(31M)61M(21Y41L32S)61Y41L	460.5	24	68.75
Q8NBI3_EHLCTPHNRGLNNK_13_HexNAc(2)Hex(9)	13258	Q8NBI3	EHLCTPHNRGLNNK	C4CamN13GlcNAc	3	N2H9F0S0	1	N,1;	1	302	13	1.25935	57.37	25.15	1186.16	C139H229N28O77S1	1	62.5	02_RE_Liver_human_15ug_TR3_240613_f	25AI2,25AIII3,	1185.83	3554.46	1185.83	2	0	01Y41Y41M(31M21M21M31G31G)61M(31M)61M	460.46	7	19.23
P07585_LGLSFNSISAVDNGSLANTPHLR_13_HexNAc(4)Hex(5)Fuc(1)	33610	P07585	LGLSFNSISAVDNGSLANTPHLR	N13GlcNAc	3	N4H5F1S0	0	N,6;	6	262	13	2.13602	37.62	23.81	1385.3	C171H280N35O83	1	161.19	10_Fat_human_15ug_TR3_231011_f		1385.3	4151.88	1385.3	2	2.9	01Y41Y41M(31M41Y(31F)41L)61M61Y41L	460.32	33	72.73
P50897_NHSIFLADINQER_1_HexNAc(2)Hex(6)	23827	P50897	NHSIFLADINQER	N1GlcNAc	3	N2H6F0S0	5	N,8;	8	197	1	0.975604	35.99	16.89	979.426	C119H192N23O62	1	113.84	18_adg_human_15ug_TR2_240615_f	BI2,CI2,25AI2,ZI3,YI3,	979.426	2935.26	979.425	1	10.52	01Y41Y41M(31M21M)61M(31M)61M	460.14	29	112.5
Q16853_YLYLASNHSNK_7_HexNAc(4)Hex(4)Fuc(1)NeuAc(1)	17699	Q16853	YLYLASNHSNK	N7GlcNAc	3	N4H4F1S1	0	N,15;	15	592	7	1.51944	50.82	22.28	1070.12	C132H208N21O70	1	81.93	17_Prostate_human_15ug_TR2_240619_f		1070.12	3207.34	1070.12	2	1.41	01Y41Y41M(31M)61M(21Y(31F)41L32S)61Y	459.51	26	115
A8K2U0_LGHINFTISTK_5_HexNAc(2)Hex(8)	25460	A8K2U0	LGHINFTISTK	N5GlcNAc	3	N2H8F0S0	3	N,24;	24	867	5	-1.42245	46.39	18.05	978.76	C120H198N17O66	1	120.2	20_Oesophagus_human_15ug_TR1_240618_f	ZI3,YI3,YI3,	978.76	2933.27	978.761	1	6.9	01Y41Y41M(31M21M)61M(31M21M)61M21M	459.17	29	130
P05164_SCPACPGSNITIR_9_HexNAc(2)Hex(4)	19536	P05164	SCPACPGSNITIR	C2CamC5CamN9GlcNAc	2	N2H4F0S0	22	N,7;	7	323	9	3.39346	50.02	16.71	1244.53	C97H164N21O50S2	1	98.08	11_Spleen_human_15ug_TR3_231108_f	01AII2,BI1,BII1,BII2,15AI2,01AII2,BII2,BI2,02XI1,ZI1,YI1,BI3,ZI2,YI2,ZII3,YII3,ZI3,ZII4,YI3,YII4,MH,02XI1,ZI1,YI1,YI2,	1244.53	2487.04	1244.52	1	0	01Y41Y41M(31M21M)61M	458.07	25	91.67
A8K2U0_HSNGSYSAFGER_3_HexNAc(2)Hex(9)	15007	A8K2U0	HSNGSYSAFGER	N3GlcNAc	3	N2H9F0S0	1	N,10;	10	1020	3	1.33509	56.05	27.95	1059.74	C125H195N20O75	1	69.8	20_Oesophagus_human_15ug_TR2_240618_f	04AI4,	1059.74	3176.21	1059.74	1	2.43	01Y41Y41M(31M21M21M)61M(31M21M)61M21M	457.41	28	113.64
P02751_RHEEGHMLNCTCFGQGR_9_HexNAc(4)Hex(4)Fuc(1)	15461	P02751	RHEEGHMLNCTCFGQGR	N9GlcNAcC10CamC12Cam	3	N4H4F1S0	0	N,0;	0	542	9	1.64765	38.66	26.3	1233.17	C145H232N35O71S3	1	76.04	15_bigintes_human_15ug_TR3_240616_f		1233.17	3695.48	1233.17	1	19.39	01Y41Y41M(31M41Y41L)61M61Y31F	457	20	59.38
P00734_SRYPHKPEINSTTHPGADLQENFCR_10_HexNAc(4)Hex(5)NeuAc(2)	20298	P00734	SRYPHKPEINSTTHPGADLQENFCR	N10GlcNAcC24Cam	5	N4H5F0S2	0	N,1;	1	143	10	1.07191	43.01	26.79	1033.04	C210H329N46O102S1	1	98.61	15_bigintes_human_15ug_TR2_240616_f		1033.04	5159.17	1033.04	1	16.89	01Y41Y41M(31M)61M(21Y41L32S)61Y41L32S	456.96	18	37.5
Q12860_GTEWLVNSSR_7_HexNAc(2)Hex(5)	19250	Q12860	GTEWLVNSSR	N7GlcNAc	2	N2H5F0S0	19	N,5;	5	457	7	-1.14986	67.78	19.4	1183.5	C95H154N17O52	1	97.36	human_brain_14ug_TR2_0703_f	BI1,BII1,BIII1,CI1,CII1,CIII1,25AI2,BI2,YI1,02XI2,ZI2,YI2,ZI3,YI3,BI4,YI4,YII4,YIII3,02XI1,34XI1,ZI1,YI1,ZI2,YI2,YI3,	1183.5	2364.99	1183.5	1	0	01Y41Y41M(31M)61M(31M)61M	456.86	23	111.11
P08648_LSPIHIALNFSLDPQAPVDSHGLRPALHYQSK_9_HexNAc(2)Hex(6)	32584	P08648	LSPIHIALNFSLDPQAPVDSHGLRPALHYQSK	N9GlcNAc	5	N2H6F0S0	4	N,4;	4	609	9	0.775712	30.26	16.19	981.678	C212H336N47O85	1	157	15_bigintes_human_15ug_TR2_240616_f	BI2,BI2,YI3,YI3,	981.276	4900.34	981.276	2	0	01Y41Y41M(31M21M)61M(31M)61M	456.35	26	41.94
Q07954_LYWISSGNHTINR_8_HexNAc(2)Hex(6)	24494	Q07954	LYWISSGNHTINR	N8GlcNAc	3	N2H6F0S0	4	N,0;	0	1763	8	2.09951	42.34	19.32	980.764	C122H192N23O60	1	116.58	19_Ovarian_human_15ug_TR2_240617_f	BI2,BI2,ZI3,YI3,	980.764	2939.27	980.762	1	11.56	01Y41Y41M(31M)61M(31M21M)61M	455.7	22	83.33
P14625_HNNDTQHIWESDSNEFSVIADPR_3_HexNAc(2)Hex(8)	28494	P14625	HNNDTQHIWESDSNEFSVIADPR	N3GlcNAc	3	N2H8F0S0	0	N,9;	9	217	3	-1.32651	61.4	23.45	1472.6	C179H274N37O92	1	138.29	02_RE_Liver_human_15ug_TR1_240613_f		1472.6	4413.79	1472.6	1	7.3	01Y41Y41M(31M21M21M)61M(31M21M)61M	455.55	27	61.36
P15586_GASNLTWR_4_HexNAc(2)Hex(6)	17147	P15586	GASNLTWR	N4GlcNAc	2	N2H6F0S0	4	N,3;	3	405	4	1.09356	75.13	23.15	1142.48	C91H148N15O52	2	81.27	18_adg_human_15ug_TR2_240615_f	BI2,ZI3,YI3,YI3,	1142.48	2282.94	1142.48	1	0	01Y41Y41M(31M21M)61M(31M)61M	455.05	18	107.14
P43308_IAPASNVSHTVVLRPLK_6_HexNAc(2)Hex(7)	20860	P43308	IAPASNVSHTVVLRPLK	N6GlcNAc	4	N2H7F0S0	4	N,9;	9	88	6	0.344709	40.48	20.99	836.905	C139H237N26O67	1	100.36	02_RE_Liver_human_15ug_TR3_240613_f	BI2,BI2,YI3,YI3,	836.655	3342.59	836.655	1	2.43	01Y41Y41M(31M21M)61M(31M21M)61M	454.83	28	81.25
P02751_HEEGHMLNCTCFGQGR_8_HexNAc(4)Hex(3)Fuc(1)	16653	P02751	HEEGHMLNCTCFGQGR	N8GlcNAcC9CamC11Cam	3	N4H3F1S0	0	N,4;	4	542	8	0.996069	47.5	27.76	1127.11	C133H210N31O65S3	1	81.62	15_bigintes_human_15ug_TR2_240616_f		1126.78	3377.32	1126.78	1	32.99	01Y41Y41M(31M41Y31F)61M61Y	454.63	25	76.67
P05556_CHEGNGTFECGACR_5_HexNAc(4)Hex(5)NeuAc(1)	11720	P05556	CHEGNGTFECGACR	C1CamN5GlcNAcC10CamC13Cam	3	N4H5F0S1	2	N,2;	2	481	5	1.20003	56.79	38.63	1190.77	C136H215N28O77S3	1	53.97	15_bigintes_human_15ug_TR1_240616_f	03AI5,35AI5,	1190.44	3568.29	1190.44	1	15.1	01Y41Y41M(31M41Y41L)61M61Y41L32S	454.44	24	84.62
P08648_VTGLNCTTNHPINPK_5_HexNAc(4)Hex(5)Fuc(1)	14870	P08648	VTGLNCTTNHPINPK	N5GlcNAcC6Cam	3	N4H5F1S0	0	N,3;	3	868	5	1.76062	36.38	27.98	1145.83	C138H229N26O72S1	1	68.82	15_bigintes_human_15ug_TR1_240616_f		1145.83	3434.48	1145.83	2	3.28	01Y41Y41M(31M41Y(31F)41L)61M61Y41L	453.58	28	89.29
Q9UMF0_GGSLWLNCSTNCPRPER_7_HexNAc(2)Hex(5)	20379	Q9UMF0	GGSLWLNCSTNCPRPER	N7GlcNAcC8CamC12Cam	3	N2H5F0S0	20	N,1;	1	54	7	-1.43234	61.9	24.5	1074.79	C128H207N30O62S2	1	102.62	human_brain_14ug_TR2_0703_f	BI1,BII1,BIII1,BI2,BI2,YI1,YI2,YI3,YI4,YII4,YIII3,02XI1,03XI1,34XI1,ZI1,YI1,02XI2,ZI2,YI2,04XI3,ZI3,YI3,YI4,YII4,YIII3,YI1,	1074.45	3220.34	1074.45	1	0	01Y41Y41M(31M)61M(31M)61M	452.42	15	40.63
Q13061_KESLQLHNVTK_8_HexNAc(2)Hex(7)	15357	Q13061	KESLQLHNVTK	N8GlcNAc	4	N2H7F0S0	4	N,18;	18	647	8	0.823511	49.71	24.92	710.071	C114H194N19O63	1	83.02	14_Muscle_human_10ug_TR3_231113_f	03AI4,YI3,ZI3,YI3,	710.321	2837.26	710.321	1	6.88	01Y41Y41M(31M)61M(31M21M)61M21M	452.1	28	130
P02679_VDKDLQSLEDILHQVENK_17_HexNAc(4)Hex(4)	35411	P02679	VDKDLQSLEDILHQVENK	N17GlcNAc	4	N4H4F0S0	4	N,9;	9	78	17	1.06432	44.18	23.52	897.165	C147H244N29O73	1	170.58	19_Ovarian_human_15ug_TR3_240617_f	BI2,BI2,YI3,YI3,	896.914	3583.63	896.913	2	13.68	01Y41Y41M(31M)61M(21Y41L)61Y	451.89	35	100
P02751_RHEEGHMLNCTCFGQGR_9_HexNAc(4)Hex(5)NeuAc(1)	17204	P02751	RHEEGHMLNCTCFGQGR	N9GlcNAcC10CamC12Cam	3	N4H5F0S1	3	N,0;	0	542	9	1.82431	61.53	29.51	1336.2	C156H249N36O80S3	1	79.68	15_bigintes_human_15ug_TR1_240616_f	03AI5,CII3,35AI5,	1335.53	4002.57	1335.53	1	6.56	01Y41Y41M(31M41Y41L)61M61Y41L32S	451.86	16	50
Q8NBF1_AFSNSSDR_4_HexNAc(2)Hex(5)	11711	Q8NBF1	AFSNSSDR	N4GlcNAc	2	N2H5F0S0	25	N,1;	1	305	4	7.63521	65.6	17.03	1050.92	C81H131N14O50	1	54.59	04_Stomach_human_15ug_TR1_240614_f	BI1,BII1,BIII1,CI1,CII1,CIII1,35AI2,03AI2,CI2,04AI3,BI2,YI1,02XI2,ZI2,YI2,ZI3,YI3,02XI1,YI4,YII4,YIII3,BI4,24XI1,ZI1,YI1,02XI2,ZI2,YI2,ZI3,YI3,YI4,YII4,YIII3,	1050.42	2099.81	1050.41	1	0	01Y41Y41M(31M)61M(31M)61M	451.77	7	28.57
Q9UHG3_GELNTSIFSSRPIDK_4_HexNAc(2)Hex(8)	25249	Q9UHG3	GELNTSIFSSRPIDK	N4GlcNAc	3	N2H8F0S0	1	N,4;	4	353	4	1.75169	42.77	20.96	1123.49	C136H225N22O75	1	120.66	18_adg_human_15ug_TR3_240615_f	25AIII2,	1123.16	3366.45	1123.16	1	2.27	01Y41Y41M(31M21M21M31G)61M(31M)61M	451.71	26	85.71
Q9Y4L1_VFGSQNLTTVK_6_HexNAc(2)Hex(6)	19902	Q9Y4L1	VFGSQNLTTVK	N6GlcNAc	2	N2H6F0S0	4	N,12;	12	515	6	1.45146	36.84	13.14	1287.07	C105H175N16O57	1	94.77	04_Stomach_human_15ug_TR1_240614_f	04AI3,BI2,YI3,YI3,	1287.07	2572.13	1287.07	1	6.42	01Y41Y41M(31M21M)61M(31M)61M	451.54	27	120
P01857_EEQYNSTYR_5_HexNAc(5)Hex(4)Fuc(1)	11781	P01857	EEQYNSTYR	N5GlcNAc	2	N5H4F1S0	0	N,1;	1	180	5	2.02332	52.13	29.5	1501.1	C120H188N19O69	1	53.96	21_Bladder_human_15ug_TR2_240619_f		1500.6	2999.18	1500.59	2	15.59	01Y41Y41M(31M41Y(31F)41L31Y)61M61Y	449.93	13	62.5
Q6P179_NISDISENLK_1_HexNAc(2)Hex(6)	25760	Q6P179	NISDISENLK	N1GlcNAc	2	N2H6F0S0	4	N,5;	5	714	1	-1.8558	46.04	12.75	1256.53	C99H168N15O59	1	122.98	04_Stomach_human_15ug_TR1_240614_f	CI2,BI2,YI3,YI3,	1256.53	2511.06	1256.54	2	0	01Y41Y41M(31M21M)61M(31M)61M	449.9	16	72.22
P69849_LENITTGTYTIHAQK_3_HexNAc(2)Hex(8)	20129	P69849	LENITTGTYTIHAQK	N3GlcNAc	3	N2H8F0S0	0	N,5;	5	369	3	0.758764	44.34	19.16	1131.83	C138H227N22O75	1	95.87	18_adg_human_15ug_TR2_240615_f		1131.83	3392.46	1131.83	1	4.31	01Y41Y41M(31M21M21M)61M(31M21M)61M	449.15	29	96.43
Q9NW75_RPLWHESDFAVDNVGNRTLR_16_HexNAc(2)Hex(8)	26791	Q9NW75	RPLWHESDFAVDNVGNRTLR	N16GlcNAc	4	N2H8F0S0	2	N,1;	1	155	16	3.30633	37.83	16.16	1022.46	C168H267N36O81	1	129.89	02_RE_Liver_human_15ug_TR1_240613_f	YI3,YI3,	1022.46	4084.79	1022.45	1	2.42	01Y41Y41M(31M21M)61M(31M21M)61M21M	448.89	7	15.79
P98160_IQGEEIVFHDLNLTAHGISHCPTCR_12_HexNAc(4)Hex(4)Fuc(1)	30872	P98160	IQGEEIVFHDLNLTAHGISHCPTCR	N12GlcNAcC21CamC24Cam	5	N4H4F1S0	0	N,1;	1	3836	12	0.478149	30.91	17.95	903.401	C186H297N42O83S2	1	143.67	15_bigintes_human_15ug_TR1_240616_f		903.403	4510.98	903.402	1	1.82	01Y41Y41M(31M)61M(21Y(31F)41L)61Y	447.96	20	41.67
O75969_IDGSENKCVYQSLYMGNEPTPTK_6_HexNAc(2)Hex(5)	21257	O75969	IDGSENKCVYQSLYMGNEPTPTK	N6GlcNAcC8Cam	4	N2H5F0S0	16	N,1;	1	152	6	0.175346	26.41	14.2	963.165	C158H252N31O75S2	1	101.72	16_Pancreas_human_15ug_TR1_240614_f	35AI3,BI1,BII1,BIII1,BI2,ZI2,YI2,YI3,YI4,YII4,YIII3,ZI1,YI1,ZI2,YI2,YI3,YI4,YII4,YIII3,02XI1,ZI1,YI1,	963.165	3847.63	963.165	1	0	01Y41Y41M(31M)61M(31M)61M	447.42	6	13.64
Q96KA5_VKDLMVINR_8_HexNAc(2)Hex(8)	19147	Q96KA5	VKDLMVINR	N8GlcNAc	3	N2H8F0S0	0	N,6;	6	229	8	-0.612518	64.54	25.97	930.742	C111H193N16O63S1	1	91.76	16_Pancreas_human_15ug_TR3_240614_f		931.076	2790.21	931.076	2	2.55	01Y41Y41M(31M21M21M)61M(31M21M)61M	447.09	23	125
P98160_NQELEDNVHISPNGSIITIVGTRPSNHGTYR_13_HexNAc(4)Hex(3)Fuc(1)	26535	P98160	NQELEDNVHISPNGSIITIVGTRPSNHGTYR	N13GlcNAc	5	N4H3F1S0	5	N,0;	0	3072	13	0.180974	40.52	20.6	973.856	C201H325N50O89	1	127.79	15_bigintes_human_15ug_TR2_240616_f	CI2,CI2,YI3,YI3,YI3,	973.856	4863.24	973.856	1	32.52	01Y41Y41M(31M)61M(21Y31F)61Y	446.92	16	26.67
Q12860_GNYSCFVSSPSITK_2_HexNAc(4)Hex(3)	21665	Q12860	GNYSCFVSSPSITK	N2GlcNAcC5Cam	2	N4H3F0S0	0	N,5;	5	208	2	-0.658046	58.02	17.03	1424.61	C117H186N21O58S1	1	107.77	human_brain_14ug_TR3_0703_f		1423.6	2845.2	1423.6	1	18.52	01Y41Y41M(31M41Y)61M61Y	446.43	27	96.15
P12110_HAELSFVFLTDGVTGNDSLHESAHSMR_16_HexNAc(4)Hex(5)Fuc(1)	34031	P12110	HAELSFVFLTDGVTGNDSLHESAHSMR	N16GlcNAc	4	N4H5F1S0	0	N,3;	3	954	16	2.24746	36.01	24.54	1182.77	C195H306N41O92S1	1	161.81	21_Bladder_human_15ug_TR3_240619_f		1182.77	4726.02	1182.76	2	6.86	01Y41Y41M(31M41Y41L)61M61Y41L21F	446.3	26	50
P02751_RHEEGHMLNCTCFGQGR_9_HexNAc(4)Hex(3)Fuc(1)	15713	P02751	RHEEGHMLNCTCFGQGR	N9GlcNAcC10CamC12Cam	3	N4H3F1S0	0	N,0;	0	542	9	1.7739	55.98	30.68	1178.82	C139H222N35O66S3	1	77.2	15_bigintes_human_15ug_TR3_240616_f		1179.15	3533.43	1179.15	2	67.01	01Y41Y41M(31M41Y31F)61M61Y	446.12	15	46.88
Q96HE7_WGHNITEFQQR_4_HexNAc(2)Hex(8)	21115	Q96HE7	WGHNITEFQQR	N4GlcNAc	3	N2H8F0S0	0	N,10;	10	280	4	-0.398094	53.01	22.38	1040.76	C127H197N22O68	2	99.63	20_Oesophagus_human_15ug_TR1_240618_f		1040.43	3118.26	1040.43	1	2.35	01Y41Y41M(31M21M21M)61M(31M21M)61M	444.57	26	115
P16444_ANLTTLAGTHTNIPK_2_HexNAc(3)Hex(5)Fuc(1)NeuAc(1)	23686	P16444	ANLTTLAGTHTNIPK	N2GlcNAc	3	N3H5F1S1	11	N,8;	8	57	2	3.46713	38.68	22	1137.51	C138H231N24O74	2	120.8	12_Tetis_human_8ug_TR3_231109_f	ZI1,YI1,14AII4,ZI2,YI2,YII3,13XII4,YII4,ZI1,YI1,YI2,	1137.18	3408.51	1137.17	1	37.32	01Y41Y41M(31M21Y(31F)41L32S)61M61M	444.56	32	107.14
P02679_DLQSLEDILHQVENK_14_HexNAc(4)Hex(5)NeuAc(2)	37373	P02679	DLQSLEDILHQVENK	N14GlcNAc	3	N4H5F0S2	0	N,9;	9	78	14	5.66588	39.02	20.6	1329.91	C160H262N27O89	1	186.29	11_Spleen_human_15ug_TR1_231108_f		1329.91	3985.68	1329.9	1	13.77	01Y41Y41M(31M41Y41L32S)61M61Y41L32S	444.11	31	103.57
Q9ULD6_EHGVLFECSPGNWTDQK_12_HexNAc(2)Hex(5)	20643	Q9ULD6	EHGVLFECSPGNWTDQK	C8CamN12GlcNAc	3	N2H5F0S0	19	N,1;	1	889	12	5.7616	51.72	16.37	1075.12	C133H203N26O64S1	1	102.78	human_brain_14ug_TR3_0703_f	BI1,BII1,BIII1,BI2,ZI1,YI1,ZI2,YI2,YI3,YI4,YII4,YIII3,02XI1,03XI1,34XI1,ZI1,YI1,ZI2,YI2,04XI3,ZI3,YI3,YI4,YII4,YIII3,	1074.45	3220.32	1074.44	1	0	01Y41Y41M(31M)61M(31M)61M	443.9	9	25
P07339_GSLSYLNVTR_7_HexNAc(2)Hex(4)	23006	P07339	GSLSYLNVTR	N7GlcNAc	2	N2H4F0S0	20	N,10;	10	263	7	0.885145	68.57	18.73	1082.99	C88H147N16O46	1	109.88	18_adg_human_15ug_TR2_240615_f	01AII2,BI1,BII1,BII2,BII2,BI2,ZI1,YI1,02XI2,ZI2,YI2,BI3,YII3,YI3,YII4,02XI1,34XI1,ZI1,YI1,ZI2,YI2,YII3,	1082.99	2163.97	1082.99	1	0	01Y41Y41M(31M21M)61M	443.87	26	127.78
Q16610_HIPGLIHNMTAR_8_HexNAc(2)Hex(9)	21199	Q16610	HIPGLIHNMTAR	N8GlcNAc	3	N2H9F0S0	0	N,4;	4	444	8	1.17914	44.84	17.34	1075.8	C129H215N22O70S1	2	100.02	20_Oesophagus_human_15ug_TR1_240618_f		1075.8	3224.37	1075.79	2	0	01Y41Y41M(31M21M21M31G31G)61M(31M)61M	443.12	18	77.27
Q9UHG3_GELNTSIFSSRPIDK_4_HexNAc(2)Hex(7)	26967	Q9UHG3	GELNTSIFSSRPIDK	N4GlcNAc	3	N2H7F0S0	3	N,3;	3	353	4	3.242	45.57	19.36	1069.14	C130H215N22O70	1	137.82	14_Muscle_human_10ug_TR3_231113_f	02AI3,YI3,YI3,	1069.14	3204.39	1069.14	1	2.29	01Y41Y41M(31M)61M(31M21M)61M21M	442.02	26	85.71
P51884_LHINHNNLTESVGPLPK_7_HexNAc(5)Hex(5)Fuc(1)	22346	P51884	LHINHNNLTESVGPLPK	N7GlcNAc	4	N5H5F1S0	0	N,16;	16	127	7	0.713074	42.6	26.55	964.69	C159H261N30O79	1	105.69	19_Ovarian_human_15ug_TR1_240617_f		964.941	3854.73	964.94	1	5.25	01Y41Y41M(31M41Y(31F)41L31Y41L)61M61Y	441.77	30	87.5
Q9H0Q0_TLPIENTTDCLSTMTSVCK_6_HexNAc(2)Hex(6)	18597	Q9H0Q0	TLPIENTTDCLSTMTSVCK	N6GlcNAcC10CamC18Cam	4	N2H6F0S0	4	N,1;	1	218	6	5.0872	40.32	17.01	889.131	C140H238N25O74S3	1	95.26	human_brain_14ug_TR1_0703_f_new	BI2,YI3,ZI3,YI3,	888.631	3549.48	888.627	1	6.9	01Y41Y41M(31M21M)61M(31M)61M	441.5	7	19.44
A8K2U0_LGHINFTISTK_5_HexNAc(2)Hex(7)	25935	A8K2U0	LGHINFTISTK	N5GlcNAc	3	N2H7F0S0	4	N,24;	24	867	5	0.578247	43.59	17.52	925.078	C114H188N17O61	1	121.88	20_Oesophagus_human_15ug_TR3_240618_f	YI3,ZI3,YI3,YI3,	924.744	2771.21	924.744	1	6.63	01Y41Y41M(31M)61M(31M21M)61M21M	440.75	28	125
P16444_ANLSQVADHLDHIK_2_HexNAc(3)Hex(5)Fuc(1)	26458	P16444	ANLSQVADHLDHIK	N2GlcNAc	4	N3H5F1S0	0	N,9;	9	279	2	1.6014	32.21	23.24	782.601	C127H209N24O66	1	134.36	12_Tetis_human_8ug_TR3_231109_f		782.601	3126.37	782.6	2	10.74	01Y41Y41M(31M41Y(31F)41L)61M61M	440.71	32	115.38
Q16853_YLYLASNHSNK_7_HexNAc(5)Hex(4)Fuc(1)	17575	Q16853	YLYLASNHSNK	N7GlcNAc	3	N5H4F1S0	0	N,15;	15	592	7	-0.373053	45.96	21.66	1041.11	C129H204N21O67	1	87.5	10_Fat_human_15ug_TR1_231011_f		1040.78	3119.32	1040.78	1	18.5	01Y41Y41M(31M41Y41L31Y)61M61Y31F	439.69	25	110
Q08380_GLNLTEDTYKPR_3_HexNAc(2)Hex(9)	20293	Q08380	GLNLTEDTYKPR	N3GlcNAc	3	N2H9F0S0	0	N,6;	6	398	3	1.31278	53.42	23.34	1091.46	C131H216N19O76	2	96.61	18_adg_human_15ug_TR3_240615_f		1091.46	3271.36	1091.46	1	6.88	01Y41Y41M(31M21M21M31G)61M(31M21M)61M	439.44	27	109.09
P02751_RHEEGHMLNCTCFGQGR_9_HexNAc(2)Hex(9)	17215	P02751	RHEEGHMLNCTCFGQGR	N9GlcNAcC10CamC12Cam	4	N2H9F0S0	0	N,3;	3	542	9	-0.651402	55.76	28.17	989.638	C153H246N33O82S3	1	82.38	02_RE_Liver_human_15ug_TR1_240613_f		989.638	3953.53	989.638	1	10.03	01Y41Y41M(31M21M21M31G31G)61M(31M)61M	439.1	18	56.25
P02751_GGNSNGALCHFPFLYNNHNYTDCTSEGR_19_HexNAc(4)Hex(5)NeuAc(1)	31449	P02751	GGNSNGALCHFPFLYNNHNYTDCTSEGR	C9CamN19GlcNAcC23Cam	4	N4H5F0S1	0	N,2;	2	430	19	2.12807	48.45	27.36	1280.52	C208H312N47O99S2	1	148.94	17_Prostate_human_15ug_TR3_240619_f		1280.27	5116.03	1280.26	1	6.64	01Y41Y41M(31M)61M(21Y41L32S)61Y41L	438.51	19	35.19
P54289_VLKDAVNNITAK_8_HexNAc(2)Hex(9)	14420	P54289	VLKDAVNNITAK	N8GlcNAc	3	N2H9F0S0	1	N,18;	18	324	8	-1.07387	39.33	17.08	1051.8	C126H217N18O73	2	71.37	15_bigintes_human_15ug_TR2_240616_f	45AI3,	1051.13	3150.38	1051.13	1	13.67	01Y41Y41M(31M21M21M)61M(31M21M)61M21M	437.52	29	118.18
Q8TCJ2_TTLVDNNTWNNSHIALVGK_10_HexNAc(2)Hex(8)	25838	Q8TCJ2	TTLVDNNTWNNSHIALVGK	N10GlcNAc	3	N2H8F0S0	5	N,3;	3	627	10	1.52123	40.61	18.68	1267.89	C155H252N29O80	1	123.56	18_adg_human_15ug_TR1_240615_f	45AI3,45AI3,04AI4,YI3,YI3,	1267.89	3799.65	1267.89	1	10.9	01Y41Y41M(31M21M)61M(31M21M)61M21M	437.08	32	83.33
Q99538_SHTNTSHVMQYGNK_4_HexNAc(4)Hex(6)	10622	Q99538	SHTNTSHVMQYGNK	N4GlcNAc	3	N4H6F0S0	4	N,8;	8	263	4	-0.18835	44.05	34.71	1130.46	C134H215N26O73S1	1	49.31	02_RE_Liver_human_15ug_TR1_240613_f	BIII3,13XIII3,13XIII3,YIII3,	1130.46	3388.36	1130.46	1	17.62	01Y41Y41M(31M41Y41L)(41Y)61M(31M)61M	436.95	29	107.69
P0DP01_NTSISTAYMELSSLR_1_HexNAc(2)Hex(8)	17413	P0DP01	NTSISTAYMELSSLR	N1GlcNAc	3	N2H8F0S0	0	N,4;	4	92	1	-5.52305	48.72	19.57	1126.47	C134H224N21O76S1	1	83.34	02_RE_Liver_human_15ug_TR3_240613_f		1126.13	3375.4	1126.14	1	10.44	01Y41Y41M(31M21M21M)61M(31M21M)61M	436.83	8	17.86
Q96JJ7_LVALAVIDEKNTSVEHTR_11_HexNAc(2)Hex(8)	22775	Q96JJ7	LVALAVIDEKNTSVEHTR	N11GlcNAc	4	N2H8F0S0	3	N,7;	7	258	11	1.19695	39.67	17.25	925.675	C150H254N27O79	1	108.75	18_adg_human_15ug_TR2_240615_f	12AIII4,12AIII4,25AIII2,	925.425	3697.67	925.424	1	9.06	01Y41Y41M(31M21M21M31G)61M(31M)61M	436	25	70.59
P24821_LNYSLPTGQWVGVQLPR_2_HexNAc(2)Hex(5)	33550	P24821	LNYSLPTGQWVGVQLPR	N2GlcNAc	3	N2H5F0S0	12	N,11;	11	1018	2	1.65297	42.23	15.25	1049.16	C135H215N26O59	1	161.67	15_bigintes_human_15ug_TR2_240616_f	BI1,BII1,BIII1,BI2,03AI2,CI2,BI2,YI2,02XI1,BI4,ZI1,YI1,YI2,YI1,	1049.16	3144.46	1049.16	1	0	01Y41Y41M(31M)61M(31M)61M	435.95	36	109.38
P01857_EEQYNSTYR_5_HexNAc(4)Hex(4)Fuc(1)	11043	P01857	EEQYNSTYR	N5GlcNAc	2	N4H4F1S0	0	N,1;	1	180	5	0.78639	39.63	31.29	1399.06	C112H175N18O64	1	50.55	20_Oesophagus_human_15ug_TR3_240618_f		1399.06	2796.1	1399.05	1	13.6	01Y41Y41M(31M41Y41L)61M61Y31F	435.76	14	68.75
P07585_IADTNITSIPQGLPPSLTELHLDGNK_5_HexNAc(2)Hex(6)	34446	P07585	IADTNITSIPQGLPPSLTELHLDGNK	N5GlcNAc	3	N2H6F0S0	4	N,5;	5	211	5	1.79961	32.41	17.6	1375.65	C172H285N34O81	1	162.35	17_Prostate_human_15ug_TR1_240619_f	BI2,BI2,YI3,YI3,	1375.65	4122.92	1375.65	1	2.33	01Y41Y41M(31M21M)61M(31M)61M	435.65	35	70
Q9UJ14_TANHSAPSLENSVQPGK_3_HexNAc(2)Hex(6)	15190	Q9UJ14	TANHSAPSLENSVQPGK	N3GlcNAc	3	N2H6F0S0	4	N,10;	10	523	3	0.24672	47.47	19.42	1039.78	C124H204N25O67	2	77.48	human_brain_14ug_TR3_0703_f	BI2,BI2,YI3,YI3,	1039.45	3115.33	1039.45	1	0	01Y41Y41M(31M21M)61M(31M)61M	435.48	35	106.25
P56199_SQNDKFNVSLTVK_7_HexNAc(2)Hex(6)	21587	P56199	SQNDKFNVSLTVK	N7GlcNAc	3	N2H6F0S0	4	N,25;	25	840	7	-1.48895	46.66	18.23	953.757	C116H193N20O62	2	103.05	18_adg_human_15ug_TR1_240615_f	BI2,CI2,YI3,YI3,	953.757	2858.26	953.758	1	0	01Y41Y41M(31M21M)61M(31M)61M	435.09	29	112.5
P01857_TKPREEQYNSTYR_9_HexNAc(5)Hex(4)	11006	P01857	TKPREEQYNSTYR	N9GlcNAc	3	N5H4F0S0	0	N,1;	1	180	9	0.42672	65.04	36.98	1113.15	C135H216N27O70	1	50.61	15_bigintes_human_15ug_TR1_240616_f		1112.81	3335.42	1112.81	1	27.03	01Y41Y41M(31M41Y41L31Y)61M61Y	434.84	11	41.67
Q01459_QINSSISGNLWDKDQR_3_HexNAc(2)Hex(4)	22586	Q01459	QINSSISGNLWDKDQR	N3GlcNAc	3	N2H4F0S0	22	N,4;	4	299	3	-0.349477	41.73	17.32	973.103	C118H192N27O58	1	107.8	18_adg_human_15ug_TR1_240615_f	01AII2,BI1,BII1,BII2,03AI2,14AII2,02AI3,15AII2,01AII2,BII2,BI2,CII2,ZI1,YI1,ZI2,YI2,BI3,YII3,YI1,ZI2,YI2,YII3,YI3,YII4,YI1,	972.769	2915.29	972.77	1	0	01Y41Y41M(31M21M)61M	434.73	26	80
P46977_TILVDNNTWNNTHISR_6_HexNAc(2)Hex(8)	22876	P46977	TILVDNNTWNNTHISR	N6GlcNAc	3	N2H8F0S0	0	N,0;	0	544	6	1.3227	41.08	17.6	1201.52	C145H235N28O77	1	110.41	02_RE_Liver_human_15ug_TR3_240613_f		1201.19	3600.53	1201.18	2	6.78	01Y41Y41M(31M21M21M)61M(31M21M)61M	434.6	24	73.33
P29622_TTPKDFYVDENTTVR_11_HexNAc(4)Hex(4)NeuAc(1)	16298	P29622	TTPKDFYVDENTTVR	N11GlcNAc	3	N4H4F0S1	2	N,1;	1	238	11	4.55586	58.35	24.96	1180.18	C145H230N25O76	1	75.42	15_bigintes_human_15ug_TR1_240616_f	03AI5,35AI5,	1180.17	3537.49	1180.17	1	12.72	01Y41Y41M(31M41Y)61M61Y41L32S	434.59	7	17.86
P08603_IPCSQPPQIEHGTINSSR_15_HexNAc(4)Hex(5)NeuAc(2)	18212	P08603	IPCSQPPQIEHGTINSSR	C3CamN15GlcNAc	3	N4H5F0S2	0	N,8;	8	882	15	1.29435	39.59	24.43	1409.93	C168H274N33O90S1	1	86.49	18_adg_human_15ug_TR1_240615_f		1409.93	4225.76	1409.93	2	61.55	01Y41Y41M(31M)61M(21Y41L32S)61Y41L32S	434.19	27	73.53
Q9UHL4_RNLSASVIAVTIQGGAHHLDLR_2_HexNAc(2)Hex(5)	29898	Q9UHL4	RNLSASVIAVTIQGGAHHLDLR	N2GlcNAc	5	N2H5F0S0	14	N,12;	12	428	2	0.383071	53.89	21.99	709.95	C146H247N36O65	1	143.36	18_adg_human_15ug_TR2_240615_f	BI1,BII1,BIII1,BI2,BI3,YI1,YI2,YI3,02XI1,ZI1,YI1,ZI2,YI2,YI3,YI1,YI2,	709.95	3544.71	709.949	1	0	01Y41Y41M(31M)61M(31M)61M	434.08	31	73.81
Q9Y2G4_EKALNSTATQR_5_HexNAc(3)Hex(4)NeuAc(1)	12797	Q9Y2G4	EKALNSTATQR	N5GlcNAc	3	N3H4F0S1	13	N,0;	0	567	5	6.08729	56.57	24.4	923.075	C108H184N21O62	1	58.12	17_Prostate_human_15ug_TR1_240619_f	02AI2,BI2,BI1,CI1,35AI4,BI2,35AI3,BI3,YI5,35AI5,YI5,ZI6,YI6,	923.408	2767.19	923.402	1	56.72	01Y41Y41M(31M)61M61Y41L32S	433.59	8	25
P26006_VWNSTFIEDYRDFDR_3_HexNAc(2)Hex(9)	33066	P26006	VWNSTFIEDYRDFDR	N3GlcNAc	3	N2H9F0S0	1	N,5;	5	935	3	2.82138	48.79	23.83	1277.19	C159H240N25O83	1	156.93	17_Prostate_human_15ug_TR3_240619_f	04AI4,	1277.19	3827.53	1277.18	1	2.4	01Y41Y41M(31M21M21M)61M(31M21M)61M21M	433.49	23	75
P02679_VDKDLQSLEDILHQVENK_17_HexNAc(4)Hex(5)Fuc(2)	35643	P02679	VDKDLQSLEDILHQVENK	N17GlcNAc	3	N4H5F2S0	0	N,8;	8	78	17	-3.51293	33.05	24.38	1347.77	C165H274N29O86	1	171.38	19_Ovarian_human_15ug_TR2_240617_f		1347.27	4037.8	1347.27	1	4.95	01Y41Y41M(31M41Y41L)61M21Y(31F)41L21F	433.14	37	100
P01857_EEQYNSTYR_5_HexNAc(5)Hex(3)Fuc(1)	11845	P01857	EEQYNSTYR	N5GlcNAc	2	N5H3F1S0	0	N,2;	2	180	5	-0.746987	50.01	22.86	1420.07	C114H178N19O64	1	54.26	21_Bladder_human_15ug_TR2_240619_f		1419.57	2837.13	1419.57	1	12.94	01Y(61F)41Y41M(31M41Y)61M(21Y)61Y	432.67	19	93.75
Q8WZ42_INGSEPLQVSWYK_2_HexNAc(2)Hex(9)	14844	Q8WZ42	INGSEPLQVSWYK	N2GlcNAc	3	N2H9F0S0	0	N,0;	0	8067	2	-1.56796	45.31	16.1	1129.81	C140H222N19O76	1	76.93	human_brain_14ug_TR2_0703_f		1129.47	3385.41	1129.48	1	9.96	01Y41Y41M(31M21M21M31G)61M(31M21M)61M	432.37	8	25
P98160_IQGEEIVFHDLNLTAHGISHCPTCR_12_HexNAc(4)Hex(5)Fuc(1)	32646	P98160	IQGEEIVFHDLNLTAHGISHCPTCR	N12GlcNAcC21CamC24Cam	5	N4H5F1S0	0	N,0;	0	3836	12	2.10227	26.27	21.02	935.814	C192H307N42O88S2	1	154.84	17_Prostate_human_15ug_TR3_240619_f		935.815	4673.03	935.813	1	4.02	01Y41Y41M(31M41Y(31F)41L)61M61Y41L	432.01	18	37.5
Q9BVK6_FTFTSHTPGEHQICLHSNSTK_18_HexNAc(2)Hex(8)	20376	Q9BVK6	FTFTSHTPGEHQICLHSNSTK	C14CamN18GlcNAc	4	N2H8F0S0	6	N,6;	6	125	18	1.4103	37.8	18.42	1034.19	C169H264N33O84S1	1	97.13	18_adg_human_15ug_TR1_240615_f	03AI4,45AI3,04AI4,YI3,YI3,YI3,	1034.19	4131.71	1034.19	1	22.13	01Y41Y41M(31M21M)61M(31M21M)61M21M	430.83	23	57.5
P11279_GHTLTLNFTR_7_HexNAc(2)Hex(7)	25282	P11279	GHTLTLNFTR	N7GlcNAc	3	N2H7F0S0	4	N,10;	10	103	7	2.14368	61.65	25.52	901.058	C109H179N18O60	1	128.56	12_Tetis_human_8ug_TR3_231109_f	BI2,ZI3,YI3,YI3,	901.058	2700.15	901.056	1	7.33	01Y41Y41M(31M21M)61M(31M21M)61M	430.76	22	105.56
O14773_FLSSSPHLPPSSYFNASGR_15_HexNAc(2)Hex(6)	26133	O14773	FLSSSPHLPPSSYFNASGR	N15GlcNAc	3	N2H6F0S0	4	N,8;	8	443	15	1.40669	46	18.8	1144.5	C145H222N27O68	1	125	18_adg_human_15ug_TR1_240615_f	BI2,BI2,YI3,YI3,	1144.17	3429.47	1144.16	1	6.78	01Y41Y41M(31M)61M(31M21M)61M	430.58	24	63.89
Q9UHG3_GELNTSIFSSRPIDK_4_HexNAc(2)Hex(9)	25228	Q9UHG3	GELNTSIFSSRPIDK	N4GlcNAc	3	N2H9F0S0	0	N,4;	4	353	4	1.84908	44.66	22.02	1177.17	C142H235N22O80	1	120.56	18_adg_human_15ug_TR3_240615_f		1177.17	3528.5	1177.17	1	16.34	01Y41Y41M(31M21M21M31G)61M(31M21M)61M	430.46	26	85.71
P01861_EEQFNSTYR_5_HexNAc(4)Hex(4)Fuc(1)	15070	P01861	EEQFNSTYR	N5GlcNAc	2	N4H4F1S0	0	N,2;	2	177	5	2.12194	36.86	28.09	1391.06	C112H175N18O63	1	70.12	20_Oesophagus_human_15ug_TR2_240618_f		1391.06	2780.1	1391.06	1	7.79	01Y41Y41M(31M41Y41L)61M61Y31F	429.62	13	62.5
P01857_EEQYNSTYR_5_HexNAc(4)Hex(4)	12097	P01857	EEQYNSTYR	N5GlcNAc	2	N4H4F0S0	0	N,2;	2	180	5	1.13026	61.42	26.54	1326.53	C106H165N18O60	1	55.44	21_Bladder_human_15ug_TR2_240619_f		1326.03	2650.04	1326.03	1	40.21	01Y41Y41M(31M41Y41L)61M61Y	429.53	13	62.5
P01876_LSLHRPALEDLLLGSEANLTCTLTGLR_18_HexNAc(3)Hex(5)NeuAc(1)	43565	P01876	LSLHRPALEDLLLGSEANLTCTLTGLR	N18GlcNAcC21Cam	4	N3H5F0S1	13	N,5;	5	144	18	1.88123	47.77	25.94	1169.81	C193H326N41O89S1	1	209.38	21_Bladder_human_15ug_TR3_240619_f	02AII2,BII2,BII1,35AII4,01AII2,BII2,CII2,35AII3,BII3,35AII4,BII4,YII5,YII6,	1169.81	4674.2	1169.81	1	49.75	01Y41Y41M(31M41Y41L32S)61M61M	429.5	26	50
A8K855_ENESQANLQLVCFTELR_2_HexNAc(2)Hex(3)	27076	A8K855	ENESQANLQLVCFTELR	N2GlcNAcC12Cam	3	N2H3F0S0	14	N,1;	1	334	2	4.61298	46.44	12.34	982.112	C120H196N27O56S1	1	129.56	18_adg_human_15ug_TR3_240615_f	BI1,BII1,BI2,BI3,ZI1,YI1,ZI2,YI2,02XI1,ZI1,YI1,ZI2,YI2,YI3,YII3,YI1,	982.112	2943.3	982.107	1	0	01Y41Y41M(31M)61M	429.2	6	15.63
P07602_NSTKQEILAALEK_1_HexNAc(2)Hex(5)Fuc(1)	24933	P07602	NSTKQEILAALEK	N1GlcNAc	3	N2H5F1S0	4	N,10;	10	426	1	0.812427	30.93	19.58	936.767	C114H196N19O61	1	119.16	18_adg_human_15ug_TR1_240615_f	01AI2,BI2,BI2,YI4,	936.767	2807.28	936.767	1	9.6	01Y(61F)41Y41M(31M)61M31M21M	429.12	33	125
P07996_VVNSTTGPGEHLR_3_HexNAc(4)Hex(5)NeuAc(1)	12815	P07996	VVNSTTGPGEHLR	N3GlcNAc	3	N4H5F0S1	3	N,3;	3	1067	3	1.07913	55.09	31.85	1094.47	C130H215N24O73	1	59.61	19_Ovarian_human_15ug_TR2_240617_f	03AI5,CII3,35AI5,	1094.47	3280.38	1094.47	1	15.44	01Y41Y41M(31M41Y41L)61M61Y41L32S	427.85	18	62.5
P07585_LGLSFNSISAVDNGSLANTPHLR_13_HexNAc(5)Hex(3)Fuc(1)	32365	P07585	LGLSFNSISAVDNGSLANTPHLR	N13GlcNAc	3	N5H3F1S0	0	N,6;	6	262	13	2.24617	40.64	21.69	1344.96	C167H273N36O78	1	155.33	19_Ovarian_human_15ug_TR3_240617_f		1344.96	4030.85	1344.96	1	8.11	01Y(61F)41Y41M(31M41Y)61M(21Y)61Y	427.71	35	75
P05090_ADGTVNQIEGEATPVNLTEPAK_16_HexNAc(2)Hex(3)Fuc(1)	24368	P05090	ADGTVNQIEGEATPVNLTEPAK	N16GlcNAc	3	N2H3F1S0	8	N,11;	11	98	16	0.119865	24.01	16.91	1098.84	C135H223N28O66	1	116.34	18_adg_human_15ug_TR3_240615_f	03AI2,BI1,BII1,BI2,BI2,24AI3,BI3,02XI1,YI1,	1098.5	3292.5	1098.5	1	0	01Y(61F)41Y41M(31M)61M	427.41	40	92.86
Q8NHP8_NQSLVQDMDSMVR_1_HexNAc(2)Hex(7)	29366	Q8NHP8	NQSLVQDMDSMVR	N1GlcNAc	3	N2H7F0S0	3	N,5;	5	465	1	0.145116	44.29	21.53	1022.08	C118H200N21O68S2	2	140.74	18_adg_human_15ug_TR3_240615_f	BI2,BIII3,BI2,BIII3,YI3,YIII3,	1022.08	3063.23	1022.08	1	4.08	01Y41Y41M(31M21M21M)61M(31M)61M	427.39	30	112.5
Q9UHP3_EITGINDTQILQQALK_6_HexNAc(2)Hex(5)	37606	Q9UHP3	EITGINDTQILQQALK	N6GlcNAc	3	N2H5F0S0	19	N,2;	2	31	6	5.62799	36.03	11.67	1001.81	C123H210N23O62	1	183.73	16_Pancreas_human_15ug_TR3_240614_f	BI1,BII1,BIII1,BI2,45AI2,YI1,ZI2,YI2,YI3,02XI1,ZI1,YI1,BI4,ZI2,YI2,ZI3,YI3,YI4,YII4,YIII3,02XI1,ZI1,YI1,	1001.48	3001.4	1001.47	1	0	01Y41Y41M(31M)61M(31M)61M	427.23	9	23.33
Q13510_ILAPAYFILGGNQSGEGCVITR_12_HexNAc(2)Hex(6)	35790	Q13510	ILAPAYFILGGNQSGEGCVITR	N12GlcNAcC18Cam	3	N2H6F0S0	2	N,8;	8	286	12	3.02628	35.94	19.45	1239.57	C156H253N30O71S1	1	172.53	18_adg_human_15ug_TR1_240615_f	BI2,BI2,	1239.57	3714.68	1239.57	2	0	01Y41Y41M(31M21M)61M(31M)61M	427.16	38	88.1
A8K2U0_HSNGSYSAFGER_3_HexNAc(2)Hex(7)	14566	A8K2U0	HSNGSYSAFGER	N3GlcNAc	3	N2H7F0S0	5	N,10;	10	1020	3	1.43272	54.33	26.69	951.372	C113H175N20O65	1	68.38	20_Oesophagus_human_15ug_TR1_240618_f	04AI4,YI3,ZI3,YI3,YI3,	951.708	2852.1	951.706	1	19.57	01Y41Y41M(31M)61M(31M21M)61M21M	426.5	26	104.55
Q86TD4_TNVSKFDLPNR_2_HexNAc(2)Hex(6)	21681	Q86TD4	TNVSKFDLPNR	N2GlcNAc	3	N2H6F0S0	3	N,6;	6	389	2	1.88326	56.57	23.62	890.727	C108H178N19O58	1	111.77	13_Heart_human_10ug_TR1_231111_f	BI2,YI3,YI3,	890.727	2669.16	890.725	1	4.93	01Y41Y41M(31M)61M(31M21M)61M	426.45	25	110
Q16620_HMNETSHTQGSLR_3_HexNAc(2)Hex(5)	10079	Q16620	HMNETSHTQGSLR	N3GlcNAc	3	N2H5F0S0	19	N,6;	6	241	3	-0.631329	60.06	37.47	905.708	C105H173N24O57S1	1	54.51	human_brain_14ug_TR1_0703_f_new	BI1,BII1,BIII1,BI2,ZI1,YI1,ZI2,YI2,YI3,02XI1,ZI1,YI1,MH,ZI2,YI2,ZI3,YI3,YI4,YII4,YIII3,02XI1,ZI1,YI1,	905.709	2714.11	905.709	1	0	01Y41Y41M(31M)61M(31M)61M	426.27	22	83.33
P08648_VTGLNCTTNHPINPK_5_HexNAc(4)Hex(5)Fuc(1)NeuAc(1)	14397	P08648	VTGLNCTTNHPINPK	N5GlcNAcC6Cam	3	N4H5F1S1	0	N,4;	4	868	5	1.192	44.46	25.22	1243.2	C149H246N27O80S1	1	71.27	15_bigintes_human_15ug_TR2_240616_f		1243.2	3725.57	1243.2	2	2.7	01Y41Y41M(31M41Y(31F)41L)61M61Y41L32S	425.91	28	92.86
Q9UJ14_TANHSAPSLENSVQPGK_3_HexNAc(2)Hex(5)	14986	Q9UJ14	TANHSAPSLENSVQPGK	N3GlcNAc	3	N2H5F0S0	14	N,9;	9	523	3	-1.68535	46.63	16.59	985.43	C118H194N25O62	1	77.63	human_brain_14ug_TR2_0703_f	BI1,BII1,BIII1,BI2,45AI2,BI2,YI1,YI2,YI3,02XI1,YI1,ZI2,YI2,YI3,YI4,YII4,YIII3,YI1,	985.431	2953.28	985.433	1	0	01Y41Y41M(31M)61M(31M)61M	425.18	34	103.13
Q9UHL4_RNLSASVIAVTIQGGAHHLDLR_2_HexNAc(2)Hex(7)	29678	Q9UHL4	RNLSASVIAVTIQGGAHHLDLR	N2GlcNAc	5	N2H7F0S0	5	N,10;	10	428	2	1.09139	50.4	21.04	774.771	C158H267N36O75	1	142.18	18_adg_human_15ug_TR1_240615_f	BI3,03AI4,CI3,YI3,YI3,	774.972	3868.82	774.971	2	4.37	01Y41Y41M(31M)61M(31M21M)61M21M	424.97	27	64.29
P29622_TTPKDFYVDENTTVR_11_HexNAc(4)Hex(4)	14660	P29622	TTPKDFYVDENTTVR	N11GlcNAc	3	N4H4F0S0	5	N,1;	1	238	11	4.4667	46.53	26.11	1083.14	C134H213N24O68	1	72.46	15_bigintes_human_15ug_TR3_240616_f	BI2,BI2,ZI3,YI3,YI3,	1083.14	3246.39	1083.14	2	20.86	01Y41Y41M(31M)61M(21Y41L)61Y	424.96	6	17.86
P05783_IVDGKVVSETNDTK_11_HexNAc(2)Hex(5)	11365	P05783	IVDGKVVSETNDTK	N11GlcNAc	3	N2H5F0S0	17	N,2;	2	423	11	0.389582	47.63	15.56	908.076	C109H186N19O60	1	53.06	02_RE_Liver_human_15ug_TR3_240613_f	BI1,BII1,BIII1,BI2,YI1,YI2,YI3,02XI1,ZI1,YI1,ZI2,YI2,ZI3,YI3,YI4,YII4,YIII3,02XI1,ZI1,YI1,YI2,	908.076	2721.21	908.076	1	0	01Y41Y41M(31M)61M(31M)61M	423.96	9	26.92
P00533_DSLSINATNIK_6_HexNAc(2)Hex(6)	20738	P00533	DSLSINATNIK	N6GlcNAc	2	N2H6F0S0	3	N,10;	10	352	6	-0.372171	48.21	18.87	1278.56	C101H173N16O59	1	98.79	18_adg_human_15ug_TR3_240615_f	BI2,YI3,YI3,	1278.06	2554.1	1278.06	1	4.67	01Y41Y41M(31M21M)61M(31M)61M	423.54	28	125
Q86VF7_YKSDLNLTR_6_HexNAc(2)Hex(5)	22939	Q86VF7	YKSDLNLTR	N6GlcNAc	2	N2H5F0S0	20	N,1;	1	1660	6	0.565842	73.03	19.63	1164.01	C94H157N16O51	1	109.48	18_adg_human_15ug_TR3_240615_f	BI1,BII1,BIII1,CI1,CII1,CIII1,BI2,ZI1,YI1,02XI2,ZI2,YI2,ZI3,YI3,BI4,YI4,YII4,YIII3,MH,02XI1,34XI1,ZI1,YI1,ZI2,YI2,YI3,	1164.02	2326.02	1164.01	1	0	01Y41Y41M(31M)61M(31M)61M	423.41	9	37.5
O14672_INTTADEKDPTNPFR_2_HexNAc(2)Hex(8)	20786	O14672	INTTADEKDPTNPFR	N2GlcNAc	3	N2H8F0S0	4	N,6;	6	278	2	-1.71507	42.92	22.64	1141.81	C137H222N23O77	1	96.97	17_Prostate_human_15ug_TR2_240619_f	35AI3,04AI4,YI3,YI3,	1141.48	3421.42	1141.48	1	8.88	01Y41Y41M(31M21M)61M(31M21M)61M21M	423.01	29	96.43
Q9UHP3_EITGINDTQILQQALK_6_HexNAc(2)Hex(6)	37479	Q9UHP3	EITGINDTQILQQALK	N6GlcNAc	3	N2H6F0S0	4	N,2;	2	31	6	4.95996	37.78	13.74	1055.49	C129H220N23O67	1	183.28	16_Pancreas_human_15ug_TR2_240614_f	BI2,YI3,ZI3,YI3,	1055.5	3163.45	1055.49	1	18.35	01Y41Y41M(31M)61M(31M21M)61M	423	8	20
P01860_EEQYNSTFR_5_HexNAc(4)Hex(4)Fuc(1)	14908	P01860	EEQYNSTFR	N5GlcNAc	2	N4H4F1S0	0	N,3;	3	227	5	2.3852	51.1	29.01	1391.06	C112H175N18O63	1	69.1	21_Bladder_human_15ug_TR2_240619_f		1391.06	2780.1	1391.06	2	10.1	01Y41Y41M(31M41Y)61M61Y41L21F	422.45	16	81.25
Q9H4B8_NFSHGQTSLDR_1_HexNAc(5)Hex(5)Fuc(1)	15047	Q9H4B8	NFSHGQTSLDR	N1GlcNAc	3	N5H5F1S0	0	N,3;	3	119	1	2.56761	45.9	27.96	1078.78	C128H206N23O73	1	78.21	12_Tetis_human_8ug_TR2_231109_f		1078.78	3233.31	1078.78	1	12.83	01Y(61F)41Y41M(31M41Y41L31Y41L)61M61Y	421.66	21	90
Q9UH99_ALSPNSTISSAPK_5_HexNAc(2)Hex(5)	16215	Q9UH99	ALSPNSTISSAPK	N5GlcNAc	2	N2H5F0S0	16	N,12;	12	636	5	2.10195	48.57	16.53	1245.56	C100H170N17O55	1	76.29	19_Ovarian_human_15ug_TR1_240617_f	BI1,BII1,BIII1,24AI4,BI2,ZI1,YI1,ZI2,YI2,YI3,BI4,YI4,YII4,YIII3,MH,02XI1,ZI1,YI1,YI2,YI3,	1245.56	2489.1	1245.56	1	0	01Y41Y41M(31M)61M(31M)61M	421.59	29	100
P02751_HEEGHMLNCTCFGQGR_8_HexNAc(4)Hex(5)Fuc(1)	17273	P02751	HEEGHMLNCTCFGQGR	N8GlcNAcC9CamC11Cam	4	N4H5F1S0	0	N,2;	2	542	8	1.57645	28.44	26.16	926.616	C145H230N31O75S3	1	79.98	15_bigintes_human_15ug_TR1_240616_f		926.616	3701.43	926.614	1	3.33	01Y41Y41M(31M)61M(21Y(31F)41L)61Y41L	421.49	23	70
O95835_ESLRNLSKPSDAAK_5_HexNAc(2)Hex(6)	23534	O95835	ESLRNLSKPSDAAK	N5GlcNAc	3	N2H6F0S0	4	N,1;	1	40	5	4.93977	39.56	14.75	965.773	C115H197N22O63	1	118	human_brain_14ug_TR2_0703_f	BI2,BI2,ZI3,YI3,	965.774	2894.29	965.769	1	9.45	01Y41Y41M(31M21M)61M(31M)61M	421.09	8	23.08
P11047_LLNNLTSIK_4_HexNAc(2)Hex(6)	22053	P11047	LLNNLTSIK	N4GlcNAc	2	N2H6F0S0	3	N,3;	3	650	4	1.44999	55.97	16.87	1198.05	C97H169N14O54	2	102.28	15_bigintes_human_15ug_TR1_240616_f	BI2,YI3,YI3,	1198.05	2394.09	1198.05	1	0	01Y41Y41M(31M21M)61M(31M)61M	420.54	21	112.5
P06865_SAEGTFFINK_9_HexNAc(2)Hex(8)	21679	P06865	SAEGTFFINK	N9GlcNAc	2	N2H8F0S0	1	N,7;	7	157	9	0.893405	47.95	17.75	1409.08	C115H183N14O66	1	103.41	18_adg_human_15ug_TR3_240615_f	12AIII4,	1409.08	2816.14	1409.07	2	0	01Y41Y41M(31M21M21M31G)61M(31M)61M	420.23	25	122.22
Q6ZMZ3_AVVEKVNGCLGR_7_HexNAc(2)Hex(8)	27217	Q6ZMZ3	AVVEKVNGCLGR	N7GlcNAcC9Cam	2	N2H8F0S0	2	N,1;	1	244	7	1.98232	66.7	22.03	1503.65	C118H203N20O67S1	2	132.11	02_RE_Liver_human_15ug_TR2_240613_f	25AIII2,25AI2,	1503.15	3004.28	1503.15	1	7.65	01Y41Y41M(31M21M21M31G)61M(31M)61M	419.75	9	31.82
P10321_GYYNQSEDGSHTLQR_4_HexNAc(2)Hex(9)	14420	P10321	GYYNQSEDGSHTLQR	N4GlcNAc	3	N2H9F0S0	1	N,3;	3	110	4	-6.79433	44.5	26.53	1207.81	C143H224N25O83	1	67.95	18_adg_human_15ug_TR2_240615_f	12AIII5,	1207.47	3619.41	1207.48	1	2.45	01Y41Y41M(31M21M21M31G31G)61M(31M)61M	419.53	25	82.14
O94856_WANITWK_3_HexNAc(2)Hex(5)	23471	O94856	WANITWK	N3GlcNAc	2	N2H5F0S0	15	N,8;	8	1133	3	-3.21386	54.13	11.65	1067.95	C91H140N13O45	1	117.68	human_brain_14ug_TR2_0703_f	BI1,BII1,BIII1,BI2,YI1,ZI2,YI2,ZI3,YI3,YI4,YII4,YIII3,02XI1,BI4,ZI1,YI1,ZI2,YI2,YI3,	1068.46	2134.91	1068.46	1	0	01Y41Y41M(31M)61M(31M)61M	419.51	20	141.67
A8K2U0_HSNGSYSAFGER_3_HexNAc(2)Hex(8)	14498	A8K2U0	HSNGSYSAFGER	N3GlcNAc	3	N2H8F0S0	4	N,10;	10	1020	3	0.409783	52.55	25.55	1005.39	C119H185N20O70	1	68.05	20_Oesophagus_human_15ug_TR1_240618_f	04AI4,YI3,YI3,YI3,	1005.72	3014.15	1005.72	1	9.77	01Y41Y41M(31M21M)61M(31M21M)61M21M	419.49	28	113.64
P02751_HEEGHMLNCTCFGQGR_8_HexNAc(4)Hex(4)Fuc(1)	17289	P02751	HEEGHMLNCTCFGQGR	N8GlcNAcC9CamC11Cam	4	N4H4F1S0	0	N,4;	4	542	8	1.1476	38.88	27.61	885.851	C139H220N31O70S3	1	80.05	15_bigintes_human_15ug_TR1_240616_f		886.102	3539.38	886.101	2	0.48	01Y41Y41M(31M)61M(21Y(31F)41L)61Y	419.16	24	73.33
Q9UHL4_ALAGLVYNASGSEHCYDIYR_8_HexNAc(2)Hex(6)	28084	Q9UHL4	ALAGLVYNASGSEHCYDIYR	N8GlcNAcC15Cam	3	N2H6F0S0	4	N,3;	3	315	8	1.74999	37.05	15.46	1213.52	C151H234N29O72S1	2	134.47	18_adg_human_15ug_TR3_240615_f	BI2,BI2,YI3,YI3,	1213.85	3637.53	1213.85	1	0	01Y41Y41M(31M21M)61M(31M)61M	418.98	26	65.79
Q13449_VAWLNR_5_HexNAc(2)Hex(7)	18039	Q13449	VAWLNR	N5GlcNAc	2	N2H7F0S0	4	N,4;	4	66	5	-1.71467	79.66	20.04	1150.48	C93H152N13O53	2	90.65	human_brain_14ug_TR3_0703_f	35AI3,ZI3,YI3,YI3,	1150.48	2298.96	1150.49	1	10.15	01Y41Y41M(31M)61M(31M21M)61M21M	418.9	14	120
Q9Y2G4_EKALNSTATQR_5_HexNAc(3)Hex(5)NeuAc(1)	12843	Q9Y2G4	EKALNSTATQR	N5GlcNAc	3	N3H5F0S1	14	N,0;	0	567	5	5.83906	54.21	25.04	977.426	C114H194N21O67	1	58.38	17_Prostate_human_15ug_TR3_240619_f	02AII2,BII2,BII1,CII1,35AII4,BII2,35AII3,BII3,35AII4,YII5,YII6,YII5,ZII6,YII6,	977.426	2929.24	977.42	1	70.89	01Y41Y41M(31M41Y41L32S)61M61M	417.58	9	30
P11279_GHTLTLNFTR_7_HexNAc(2)Hex(6)	23345	P11279	GHTLTLNFTR	N7GlcNAc	3	N2H6F0S0	5	N,5;	5	103	7	3.47565	53.04	16.65	847.042	C103H169N18O55	1	111.54	18_adg_human_15ug_TR2_240615_f	BI2,25AI2,CI2,ZI3,YI3,	847.042	2538.1	847.039	1	2.31	01Y41Y41M(31M21M)61M(31M)61M	417.19	21	105.56
A8K2U0_THHWNITAVK_5_HexNAc(2)Hex(9)	17987	A8K2U0	THHWNITAVK	N5GlcNAc	3	N2H9F0S0	1	N,12;	12	857	5	1.16564	51.25	20.25	1025.1	C125H200N19O69	1	84.8	20_Oesophagus_human_15ug_TR1_240618_f	04AI4,	1024.76	3071.27	1024.76	1	11.78	01Y41Y41M(31M21M21M)61M(31M21M)61M21M	416.89	23	116.67
Q16853_YLYLASNHSNK_7_HexNAc(4)Hex(5)Fuc(1)	17644	Q16853	YLYLASNHSNK	N7GlcNAc	3	N4H5F1S0	0	N,15;	15	592	7	0.549299	40.05	26.68	1027.11	C127H201N20O67	1	86.46	10_Fat_human_15ug_TR2_231011_f		1027.1	3078.29	1027.1	2	2.78	01Y41Y41M(31M41Y(31F)41L)61M61Y41L	416.62	26	115
Q6RSH7_IIICNHSPR_5_HexNAc(2)Hex(5)	22838	Q6RSH7	IIICNHSPR	C4CamN5GlcNAc	2	N2H5F0S0	20	N,1;	1	60	5	4.55187	70.22	16.36	1164.02	C93H157N18O48S1	1	109.06	18_adg_human_15ug_TR2_240615_f	01AI1,01AII1,01AIII1,BI1,BII1,BIII1,CI1,CII1,CIII1,BI2,ZI1,YI1,ZI2,YI2,ZI3,YI3,BI4,YI4,YII4,YIII3,MH,02XI1,34XI1,ZI1,YI1,ZI2,YI2,YI3,	1164.02	2326.01	1164.01	1	0	01Y41Y41M(31M)61M(31M)61M	416.6	6	25
Q96AY3_YHYNGTFEDGK_4_HexNAc(2)Hex(6)	15516	Q96AY3	YHYNGTFEDGK	N4GlcNAc	3	N2H6F0S0	4	N,8;	8	70	4	-0.48108	50.92	26.09	904.021	C112H166N17O60	1	73.36	18_adg_human_15ug_TR2_240615_f	BI2,YI3,ZI3,YI3,	904.021	2709.05	904.021	1	14.66	01Y41Y41M(31M21M)61M(31M)61M	416.56	25	110
Q7Z7H5_FTFTSHTPGDHQICLHSNSTR_18_HexNAc(2)Hex(7)	20952	Q7Z7H5	FTFTSHTPGDHQICLHSNSTR	C14CamN18GlcNAc	5	N2H7F0S0	4	N,7;	7	117	18	2.86133	36.66	19.95	797.94	C162H252N35O79S1	1	99.84	18_adg_human_15ug_TR3_240615_f	BI2,BIII3,CI2,CIII3,YI3,YIII3,YI3,YIII3,	797.94	3983.65	797.937	1	6.93	01Y41Y41M(31M21M21M)61M(31M)61M	416.18	19	47.5
P55083_FNGSVSFFR_2_HexNAc(2)Hex(7)	28214	P55083	FNGSVSFFR	N2GlcNAc	2	N2H7F0S0	5	N,2;	2	87	2	0.478505	72.35	21.69	1301.53	C108H166N15O58	1	143.5	12_Tetis_human_8ug_TR2_231109_f	BI2,BI2,ZI3,YI3,YI3,	1301.53	2601.05	1301.53	1	9.94	01Y41Y41M(31M21M)61M(31M21M)61M	416.17	20	100
A8K2U0_HSNGSYSAFGER_3_HexNAc(4)Hex(3)	14981	A8K2U0	HSNGSYSAFGER	N3GlcNAc	3	N4H3F0S0	0	N,4;	4	1020	3	0.093788	51.35	20.64	870.688	C105H161N22O55	1	70.43	20_Oesophagus_human_15ug_TR1_240618_f		871.022	2610.05	871.022	1	22.66	01Y41Y41M(31M41Y)61M61Y	416.04	20	77.27
Q9UHG3_LLHALGGDDFLGMLNR_15_HexNAc(2)Hex(6)	34341	Q9UHG3	LLHALGGDDFLGMLNR	N15GlcNAc	3	N2H6F0S0	4	N,12;	12	196	15	1.80557	41.01	13.83	1041.14	C129H211N24O62S1	1	165.31	18_adg_human_15ug_TR1_240615_f	BI2,CI2,BI2,YI3,	1041.14	3120.38	1041.13	1	1.77	01Y41Y41M(31M21M)61M(31M)61M	415.99	32	103.33
P51884_LHINHNNLTESVGPLPK_7_HexNAc(5)Hex(4)Fuc(1)	22223	P51884	LHINHNNLTESVGPLPK	N7GlcNAc	4	N5H4F1S0	0	N,16;	16	127	7	1.22304	43.28	21.97	924.429	C153H251N30O74	1	105.47	19_Ovarian_human_15ug_TR2_240617_f		924.178	3692.68	924.176	1	14.35	01Y41Y41M(31M41Y(31F)41L31Y)61M61Y	415.22	28	81.25
P16671_VFNGKDNISK_7_HexNAc(2)Hex(9)	14221	P16671	VFNGKDNISK	N7GlcNAc	3	N2H9F0S0	0	N,12;	12	220	7	0.357081	63.2	27.73	996.417	C119H197N16O71	2	70.96	10_Fat_human_15ug_TR2_231011_f		996.416	2986.23	996.416	1	12.35	01Y41Y41M(31M21M21M)61M(31M21M)61M21M	414.97	23	111.11
P02751_HEEGHMLNCTCFGQGR_8_HexNAc(4)Hex(5)NeuAc(1)	19518	P02751	HEEGHMLNCTCFGQGR	N8GlcNAcC9CamC11Cam	3	N4H5F0S1	0	N,3;	3	542	8	0.483804	50.91	28.3	1283.5	C150H237N32O79S3	1	90.81	17_Prostate_human_15ug_TR1_240619_f		1283.5	3846.47	1283.5	2	7.43	01Y41Y41M(31M)61M(21Y41L32S)61Y41L	414.95	22	66.67
Q8NHP8_HPDAVAWANLTNAIR_9_HexNAc(2)Hex(8)	29390	Q8NHP8	HPDAVAWANLTNAIR	N9GlcNAc	3	N2H8F0S0	0	N,24;	24	88	9	0.146258	47.38	21.32	1117.82	C137H220N25O71	1	140.79	18_adg_human_15ug_TR1_240615_f		1118.15	3351.44	1118.15	2	16.93	01Y41Y41M(31M21M21M)61M(31M21M)61M	414.93	29	100
Q05707_SFMVNWTHAPGNVEK_5_HexNAc(4)Hex(5)NeuAc(1)	28327	Q05707	SFMVNWTHAPGNVEK	N5GlcNAc	3	N4H5F0S1	0	N,3;	3	372	5	3.02138	46.41	24.68	1211.17	C150H233N26O75S1	1	134.07	21_Bladder_human_15ug_TR2_240619_f		1211.17	3630.49	1211.17	2	13.41	01Y41Y41M(31M)61M(21Y41L32S)61Y41L	414.86	25	82.14
Q13510_TSQENISFETMYDVLSTKPVLNK_5_HexNAc(2)Hex(7)	36041	Q13510	TSQENISFETMYDVLSTKPVLNK	N5GlcNAc	3	N2H7F0S0	5	N,2;	2	348	5	2.31213	33.72	15.43	1396.63	C174H283N30O85S1	1	173.76	18_adg_human_15ug_TR1_240615_f	45AI3,CI3,04AI4,YI3,YI3,	1396.29	4184.85	1396.29	2	13.55	01Y41Y41M(31M)61M(31M21M)61M21M	414.1	28	63.64
Q9UNW1_NATALYHVEAFK_1_HexNAc(2)Hex(6)	22820	Q9UNW1	NATALYHVEAFK	N1GlcNAc	3	N2H6F0S0	3	N,8;	8	242	1	1.17045	38.4	18.83	915.066	C115H181N18O58	2	108.94	18_adg_human_15ug_TR1_240615_f	BI2,CI2,YI3,	915.066	2742.18	915.065	1	0	01Y41Y41M(31M21M)61M(31M)61M	413.47	30	127.27
P01859_EEQFNSTFR_5_HexNAc(5)Hex(4)Fuc(1)	17268	P01859	EEQFNSTFR	N5GlcNAc	2	N5H4F1S0	0	N,1;	1	176	5	1.33336	50.31	25.1	1484.6	C120H188N19O67	1	81.96	18_adg_human_15ug_TR1_240615_f		1484.6	2967.19	1484.6	1	5.19	01Y41Y41M(31M41Y(31F)41L31Y)61M61Y	413.41	13	62.5
P01877_TPLTANITK_6_HexNAc(5)Hex(4)Fuc(1)	14677	P01877	TPLTANITK	N6GlcNAc	2	N5H4F1S0	0	N,8;	8	205	6	2.7655	43.13	19.45	1385.12	C112H191N16O63	1	72.54	15_bigintes_human_15ug_TR2_240616_f		1385.12	2768.22	1385.12	2	3.13	01Y41Y41M(31M41Y41L31Y)61M61Y31F	412.83	23	125
Q6ZMZ3_AVVEKVNGCLGR_7_HexNAc(2)Hex(7)	27715	Q6ZMZ3	AVVEKVNGCLGR	N7GlcNAcC9Cam	2	N2H7F0S0	6	N,2;	2	244	7	2.90563	62.58	19.41	1422.12	C112H193N20O62S1	1	134.46	02_RE_Liver_human_15ug_TR1_240613_f	BI2,03AI3,BI2,ZI3,YI3,YI3,	1422.12	2842.23	1422.12	1	14.97	01Y41Y41M(31M21M)61M(31M21M)61M	412.28	10	31.82
P21810_LLQVVYLHSNNITK_11_HexNAc(6)Hex(3)Fuc(1)	26477	P21810	LLQVVYLHSNNITK	N11GlcNAc	3	N6H3F1S0	0	N,7;	7	311	11	2.15584	41.28	23.18	1165.55	C147H243N26O70	1	124.44	17_Prostate_human_15ug_TR2_240619_f		1165.22	3492.63	1165.21	1	5.71	01Y41Y41M(31M(21Y31F)41Y)61M(21Y)61Y	412.16	28	100
Q02817_GDHNDSYALLGELAPCGSTDKQTCLK_4_HexNAc(5)Hex(5)Fuc(1)	26444	Q02817	GDHNDSYALLGELAPCGSTDKQTCLK	N4GlcNAcC16CamC24Cam	4	N5H5F1S0	0	N,9;	9	423	4	1.73404	36.24	29.25	1207.01	C194H314N39O98S2	1	127.27	15_bigintes_human_15ug_TR3_240616_f		1206.76	4822.02	1206.76	1	7.74	01Y41Y41M(31M41Y41L31Y41L)61M61Y31F	412.03	32	64
P43251_NPVGLIGAENATGETDPSHSK_10_HexNAc(2)Hex(6)	20089	P43251	NPVGLIGAENATGETDPSHSK	N10GlcNAc	3	N2H6F0S0	4	N,6;	6	349	10	2.2834	36.68	17.92	1158.5	C139H227N28O74	1	95.67	18_adg_human_15ug_TR2_240615_f	BI2,BI2,YI3,YI3,	1158.5	3472.49	1158.5	2	0	01Y41Y41M(31M21M)61M(31M)61M	411.93	32	77.5
P23515_SLWNMSAANNNIK_4_HexNAc(2)Hex(9)	23925	P23515	SLWNMSAANNNIK	N4GlcNAc	3	N2H9F0S0	0	N,8;	8	103	4	-0.206572	46.23	19.66	1110.12	C132H216N21O75S1	1	118.82	human_brain_14ug_TR3_0703_f		1110.12	3327.35	1110.12	1	6.21	01Y41Y41M(31M21M21M31G31G)61M(31M)61M	411.85	31	112.5
P06865_SAEGTFFINK_9_HexNAc(2)Hex(7)	21642	P06865	SAEGTFFINK	N9GlcNAc	2	N2H7F0S0	4	N,7;	7	157	9	0.434672	39.9	15.47	1328.05	C109H173N14O61	1	103.3	18_adg_human_15ug_TR2_240615_f	BI2,BI2,YI3,YI3,	1328.05	2654.09	1328.05	1	4.48	01Y41Y41M(31M21M)61M(31M21M)61M	411.8	24	116.67
Q93099_QDVSPFNVVAWHGNYTPYK_14_HexNAc(4)Hex(3)Fuc(1)	16648	Q93099	QDVSPFNVVAWHGNYTPYK	N14GlcNAc	3	N4H3F1S0	0	N,0;	0	271	14	6.47546	40.31	18.19	1223.55	C160H237N30O68	1	79.2	16_Pancreas_human_15ug_TR3_240614_f		1223.55	3666.6	1223.54	1	8.95	01Y41Y41M(31M41Y31F)61M61Y	411	7	19.44
P01876_LSLHRPALEDLLLGSEANLTCTLTGLR_18_HexNAc(2)Hex(8)	41510	P01876	LSLHRPALEDLLLGSEANLTCTLTGLR	N18GlcNAcC21Cam	4	N2H8F0S0	3	N,5;	5	144	18	0.144857	32.29	17.47	1168.3	C192H326N39O91S1	2	194.08	15_bigintes_human_15ug_TR2_240616_f	12AIII4,25AIII2,25AI2,	1167.8	4666.18	1167.8	2	56.29	01Y41Y41M(31M21M21M31G)61M(31M)61M	410.98	32	61.54
P56199_SENASLVLSSSNQK_3_HexNAc(2)Hex(6)	17596	P56199	SENASLVLSSSNQK	N3GlcNAc	2	N2H6F0S0	3	N,4;	4	1113	3	-1.79737	50.17	22.14	1422.11	C111H189N20O65	1	81.43	17_Prostate_human_15ug_TR2_240619_f	BI2,ZI3,YI3,	1422.11	2842.21	1422.11	1	9.62	01Y41Y41M(31M21M)61M(31M)61M	410.74	27	92.31
Q9Y222_QLHENQKNNPTLLENK_15_HexNAc(5)Hex(4)NeuAc(1)	36374	Q9Y222	QLHENQKNNPTLLENK	N15GlcNAc	4	N5H4F0S1	0	N,2;	2	422	15	6.87205	52.29	19.7	969.688	C156H257N32O81	1	173.89	19_Ovarian_human_15ug_TR1_240617_f		969.938	3874.7	969.932	1	4.72	01Y41Y41M(31M41Y)61M(21Y41L32S)61Y	410.62	9	26.67
P02679_DLQSLEDILHQVENK_14_HexNAc(4)Hex(4)NeuAc(1)	37613	P02679	DLQSLEDILHQVENK	N14GlcNAc	3	N4H4F0S1	4	N,8;	8	78	14	2.09086	57.91	21.76	1178.52	C143H235N26O76	1	179.99	19_Ovarian_human_15ug_TR1_240617_f	BII2,CII2,03AI5,35AI5,	1178.52	3532.53	1178.52	1	7.95	01Y41Y41M(31M41Y)61M61Y41L32S	410	31	103.57
P02751_DQCIVDDITYNVNDTFHK_13_HexNAc(4)Hex(5)Fuc(1)	31302	P02751	DQCIVDDITYNVNDTFHK	C3CamN13GlcNAc	3	N4H5F1S0	0	N,9;	9	528	13	2.48275	29.01	20.8	1323.22	C162H254N29O83S1	1	148.21	17_Prostate_human_15ug_TR3_240619_f		1323.22	3965.63	1323.22	2	0.66	01Y41Y41M(31M41Y(31F)41L)61M61Y41L	409.73	32	91.18
P01877_HYTNSSQDVTVPCRVPPPPPCCHPR_4_HexNAc(5)Hex(3)Fuc(1)	17001	P01877	HYTNSSQDVTVPCRVPPPPPCCHPR	N4GlcNAcC13CamC21CamC22Cam	4	N5H3F1S0	0	N,2;	2	92	4	0.736622	45.94	24.68	1152.75	C189H298N45O82S3	1	83.27	15_bigintes_human_15ug_TR2_240616_f		1152.75	4605.97	1152.75	1	7.18	01Y41Y41M(31M41Y31F)61M(21Y)61Y	409.57	16	33.33
P02787_QQQHLFGSNVTDCSGNFCLFR_9_HexNAc(4)Hex(5)NeuAc(2)	31785	P02787	QQQHLFGSNVTDCSGNFCLFR	N9GlcNAcC13CamC18Cam	3	N4H5F0S2	0	N,1;	1	630	9	0.716265	43.2	27.93	1574.64	C191H296N39O95S2	1	153.08	15_bigintes_human_15ug_TR2_240616_f		1574.64	4719.9	1574.64	2	25.93	01Y41Y41M(31M)61M(21Y41L32S)61Y41L32S	409.35	32	72.5
P07711_YSVANDTGFVDIPKQEK_5_HexNAc(2)Hex(4)	23875	P07711	YSVANDTGFVDIPKQEK	N5GlcNAc	3	N2H4F0S0	20	N,1;	1	221	5	2.14984	40.28	16.16	989.781	C125H198N23O59	1	114.08	18_adg_human_15ug_TR2_240615_f	01AII2,BI1,BII1,BII2,01AII2,BII2,BI2,02AI3,YI1,ZI2,YI2,BI3,YII3,YI3,YII4,02XI1,ZI1,YI1,YI2,YII3,YI3,YII4,YI1,	989.448	2965.32	989.446	1	0	01Y41Y41M(31M21M)61M	408.49	24	71.88
O15021_SFSCLNR_6_HexNAc(2)Hex(6)	11501	O15021	SFSCLNR	C4CamN6GlcNAc	2	N2H6F0S0	4	N,1;	1	1288	6	-0.815043	73.98	21.22	1131.95	C88H145N14O52S1	1	53.55	04_Stomach_human_15ug_TR1_240614_f	BI2,ZI3,YI3,YI3,	1131.95	2261.89	1131.95	2	0	01Y41Y41M(31M21M)61M(31M)61M	408.28	7	33.33
P01876_LSLHRPALEDLLLGSEANLTCTLTGLR_18_HexNAc(5)Hex(5)	42189	P01876	LSLHRPALEDLLLGSEANLTCTLTGLR	N18GlcNAcC21Cam	4	N5H5F0S0	0	N,2;	2	144	18	3.49328	56.88	36.03	1198.58	C198H335N42O91S1	1	203.25	21_Bladder_human_15ug_TR2_240619_f		1198.58	4789.26	1198.57	1	7.83	01Y41Y41M(31M41Y41L31Y41L)61M61Y	408.28	21	40.38
Q13449_VAWLNR_5_HexNAc(2)Hex(8)	17184	Q13449	VAWLNR	N5GlcNAc	2	N2H8F0S0	0	N,3;	3	66	5	-0.752638	80.1	24.34	1231.51	C99H162N13O58	1	88.71	human_brain_14ug_TR1_0703_f_new		1231.51	2461.01	1231.51	2	10.33	01Y41Y41M(31M21M21M)61M(31M21M)61M	408.2	12	100
P16444_ANLSQVADHLDHIK_2_HexNAc(3)Hex(5)Fuc(1)NeuAc(1)	26920	P16444	ANLSQVADHLDHIK	N2GlcNAc	4	N3H5F1S1	10	N,10;	10	279	2	2.3293	37.89	20.2	855.626	C138H226N25O74	1	136.66	12_Tetis_human_8ug_TR3_231109_f	14AII4,YI2,ZI1,YI1,ZI2,YI2,YII3,YII4,ZI1,YI1,	855.376	3417.47	855.374	1	1.92	01Y41Y41M(31M21Y(31F)41L32S)61M61M	407.82	32	115.38
P56199_SENASLVLSSSNQK_3_HexNAc(2)Hex(7)	17336	P56199	SENASLVLSSSNQK	N3GlcNAc	2	N2H7F0S0	4	N,4;	4	1113	3	-0.111408	49.03	20.61	1503.14	C117H199N20O70	1	80.25	17_Prostate_human_15ug_TR1_240619_f	BI2,04AI3,ZI3,YI3,	1503.14	3004.26	1503.14	1	14.04	01Y41Y41M(31M21M)61M(31M21M)61M	407.75	30	103.85
P07585_IADTNITSIPQGLPPSLTELHLDGNK_5_HexNAc(3)Hex(5)	33497	P07585	IADTNITSIPQGLPPSLTELHLDGNK	N5GlcNAc	3	N3H5F0S0	4	N,4;	4	211	5	2.50215	32.22	19.72	1389.33	C174H288N35O81	1	159.61	19_Ovarian_human_15ug_TR1_240617_f	BII3,CII3,YII3,YII3,	1389.33	4163.95	1389.32	1	32.27	01Y41Y41M(31M41Y41L)61M61M	407.66	34	66
P29622_TTPKDFYVDENTTVR_11_HexNAc(4)Hex(5)NeuAc(1)	16027	P29622	TTPKDFYVDENTTVR	N11GlcNAc	3	N4H5F0S1	2	N,1;	1	238	11	3.43885	54.85	22.13	1234.53	C151H240N25O81	1	74.22	15_bigintes_human_15ug_TR1_240616_f	03AI5,35AI5,	1234.19	3699.54	1234.19	1	14.83	01Y41Y41M(31M41Y41L)61M61Y41L32S	407.29	6	17.86
P15848_GHTNGTKPLDGFDVWK_4_HexNAc(2)Hex(6)	26896	P15848	GHTNGTKPLDGFDVWK	N4GlcNAc	3	N2H6F0S0	4	N,5;	5	366	4	3.37277	39.4	19.45	1051.46	C132H205N24O64	2	128.7	18_adg_human_15ug_TR2_240615_f	BI2,BI2,YI3,YI3,	1051.13	3150.35	1051.12	1	0	01Y41Y41M(31M)61M(31M21M)61M	407.19	26	83.33
P07585_LGLSFNSISAVDNGSLANTPHLR_13_HexNAc(4)Hex(4)Fuc(1)NeuAc(1)	33984	P07585	LGLSFNSISAVDNGSLANTPHLR	N13GlcNAc	3	N4H4F1S1	0	N,4;	4	262	13	1.61717	48.82	20.84	1428.32	C176H287N36O86	1	160.1	17_Prostate_human_15ug_TR1_240619_f		1428.32	4280.92	1428.31	1	2.22	01Y(61F)41Y41M(31M41Y)61M61Y41L32S	407.18	34	75
P01857_EEQYNSTYR_5_HexNAc(5)Hex(4)	12266	P01857	EEQYNSTYR	N5GlcNAc	2	N5H4F0S0	0	N,1;	1	180	5	2.66253	67.82	31.45	1427.57	C114H178N19O65	1	56.26	21_Bladder_human_15ug_TR2_240619_f		1427.57	2853.12	1427.57	1	30.39	01Y41Y41M(31M41Y41L31Y)61M61Y	407.1	13	62.5
P12109_NVTAQICIDKK_1_HexNAc(3)Hex(5)NeuAc(1)	17921	P12109	NVTAQICIDKK	N1GlcNAcC7Cam	3	N3H5F0S1	11	N,4;	4	804	1	2.30027	42.78	20.49	1001.44	C119H203N20O66S1	1	83.07	17_Prostate_human_15ug_TR1_240619_f	02AII2,BII2,BII1,CII1,35AII4,BII2,35AII3,BII3,35AII4,YII5,YII6,	1001.1	3000.29	1001.1	1	41.19	01Y41Y41M(31M41Y41L32S)61M61M	406.59	25	110
P0DP01_NTSISTAYMELSSLR_1_HexNAc(2)Hex(9)	17308	P0DP01	NTSISTAYMELSSLR	N1GlcNAc	3	N2H9F0S0	0	N,3;	3	92	1	-4.78178	45.27	18.51	1180.49	C140H234N21O81S1	1	82.82	02_RE_Liver_human_15ug_TR3_240613_f		1180.15	3537.46	1180.16	2	12.92	01Y41Y41M(31M21M21M31G)61M(31M21M)61M	406.53	7	17.86
Q86TD4_TNVSKFDLPNR_2_HexNAc(2)Hex(7)	21598	Q86TD4	TNVSKFDLPNR	N2GlcNAc	3	N2H7F0S0	2	N,7;	7	389	2	3.15892	50.89	23.39	944.745	C114H188N19O63	1	111.36	13_Heart_human_10ug_TR1_231111_f	YI3,YI3,	944.745	2831.21	944.742	1	7.31	01Y41Y41M(31M)61M(31M21M)61M21M	406.5	27	115
P16444_ANLSQVADHLDHIK_2_HexNAc(4)Hex(5)Fuc(1)NeuAc(1)	26857	P16444	ANLSQVADHLDHIK	N2GlcNAc	4	N4H5F1S1	0	N,9;	9	279	2	1.85255	32.82	23.28	906.145	C146H239N26O79	1	136.35	12_Tetis_human_8ug_TR3_231109_f		906.145	3620.55	906.144	1	2.85	01Y41Y41M(31M)61M(21Y41L32S)61Y(31F)41L	406.21	31	111.54
Q5THJ4_QLNLTIR_3_HexNAc(2)Hex(5)	15959	Q5THJ4	QLNLTIR	N3GlcNAc	2	N2H5F0S0	20	N,2;	2	3263	3	0.666318	81.08	21.04	1037.98	C83H145N14O46	1	75.46	16_Pancreas_human_15ug_TR1_240614_f	BI1,BII1,BIII1,CI1,CII1,CIII1,02XI1,BI2,ZI1,YI1,02XI2,ZI2,YI2,ZI3,YI3,02XI1,YI4,YII4,YIII3,BI4,ZI1,YI1,ZI2,YI2,YI3,YI4,YII4,YIII3,	1037.48	2073.94	1037.48	1	0	01Y41Y41M(31M)61M(31M)61M	405.67	12	75
P05556_KDTCTQECSYFNITK_12_HexNAc(4)Hex(5)Fuc(1)NeuAc(1)	20960	P05556	KDTCTQECSYFNITK	C4CamC8CamN12GlcNAc	3	N4H5F1S1	0	N,5;	5	669	12	1.50952	45.9	25.06	1319.53	C158H253N26O86S2	1	101.71	15_bigintes_human_15ug_TR3_240616_f		1319.53	3954.57	1319.53	2	0.85	01Y41Y41M(31M41Y(31F)41L)61M61Y41L32S	405.64	30	100
P00738_MVSHHNLTTGATLINEQWLLTTAK_6_HexNAc(4)Hex(5)NeuAc(2)	34867	P00738	MVSHHNLTTGATLINEQWLLTTAK	N6GlcNAc	4	N4H5F0S2	0	N,6;	6	184	6	0.472279	40.31	24.28	1222.3	C202H328N39O97S1	1	165.35	20_Oesophagus_human_15ug_TR1_240618_f		1222.3	4884.17	1222.3	1	20.81	01Y41Y41M(31M)61M(21Y41L32S)61Y41L32S	405.63	29	60.87
P07339_GSLSYLNVTR_7_HexNAc(2)Hex(5)Fuc(1)	22118	P07339	GSLSYLNVTR	N7GlcNAc	2	N2H5F1S0	4	N,6;	6	263	7	1.19543	35.83	18.36	1237.04	C100H167N16O55	1	105.6	18_adg_human_15ug_TR1_240615_f	BI2,BI2,CI2,YI4,	1237.04	2472.08	1237.04	1	9.68	01Y(61F)41Y41M(31M)61M31M21M	405.46	25	122.22
P02765_KVCQDCPLLAPLNDTR_13_HexNAc(4)Hex(5)NeuAc(2)	26273	P02765	KVCQDCPLLAPLNDTR	C3CamC6CamN13GlcNAc	3	N4H5F0S2	0	N,7;	7	156	13	1.61101	43.87	23.66	1369.58	C163H271N30O87S2	1	126.44	15_bigintes_human_15ug_TR3_240616_f		1369.58	4104.71	1369.58	2	11.67	01Y41Y41M(31M)61M(21Y41L32S)61Y41L32S	405.33	28	86.67
P07339_GSLSYLNVTR_7_HexNAc(2)Hex(9)	22229	P07339	GSLSYLNVTR	N7GlcNAc	2	N2H9F0S0	0	N,6;	6	263	7	-0.110175	65.64	22.34	1488.12	C118H197N16O71	1	106.14	18_adg_human_15ug_TR3_240615_f		1488.12	2974.23	1488.12	2	4.79	01Y41Y41M(31M21M21M31G31G)61M(31M)61M	405.04	23	111.11
P05164_SCPACPGSNITIR_9_HexNAc(2)Hex(5)	19167	P05164	SCPACPGSNITIR	C2CamC5CamN9GlcNAc	2	N2H5F0S0	17	N,7;	7	323	9	2.95823	52.44	18.3	1325.55	C103H174N21O55S2	1	97.1	11_Spleen_human_15ug_TR1_231108_f	BI1,BII1,BIII1,24AI4,BI2,03AI3,YI1,ZI2,YI2,BI4,ZI3,YI3,YI4,YII4,YIII3,MH,02XI1,ZI1,YI1,YI2,YI3,	1325.55	2649.09	1325.55	1	0	01Y41Y41M(31M)61M(31M)61M	405.01	25	91.67
Q8N3J6_VDHESLNATPQVAMQVLEIHYTPSVK_7_HexNAc(4)Hex(3)Fuc(1)	29774	Q8N3J6	VDHESLNATPQVAMQVLEIHYTPSVK	N7GlcNAc	4	N4H3F1S0	0	N,5;	5	211	7	-2.8106	46.27	18.62	1089.01	C184H297N38O80S1	1	149.52	human_brain_14ug_TR1_0703_f_28802-		1089.01	4351.01	1089.01	2	29.93	01Y41Y41M(31M41Y31F)61M61Y	404.68	31	62
Q16853_QPQPNVSELVVGPLPHPSYMR_5_HexNAc(2)Hex(5)	32351	Q16853	QPQPNVSELVVGPLPHPSYMR	N5GlcNAc	4	N2H5F0S0	12	N,7;	7	137	5	1.88182	31.13	14.45	891.666	C151H242N31O65S1	1	155.2	10_Fat_human_15ug_TR3_231011_f	BI1,BII1,BIII1,BI2,03AI4,YI2,ZI1,YI1,ZI2,YI2,ZI3,YI3,YI4,YII4,YIII3,YI1,	891.416	3561.63	891.414	1	0	01Y41Y41M(31M)61M(31M)61M	403.84	30	75
Q99523_HLYTTTGGETDFTNVTSLR_14_HexNAc(2)Hex(9)	26689	Q99523	HLYTTTGGETDFTNVTSLR	N14GlcNAc	3	N2H9F0S0	0	N,11;	11	406	14	2.81779	48.02	24.35	1327.23	C161H258N27O88	1	135.51	12_Tetis_human_8ug_TR3_231109_f		1327.23	3977.65	1327.23	2	8.82	01Y41Y41M(31M21M21M31G)61M(31M21M)61M	403.28	34	91.67
Q5JSH3_VGNESPVQELK_3_HexNAc(2)Hex(8)	18197	Q5JSH3	VGNESPVQELK	N3GlcNAc	3	N2H8F0S0	3	N,3;	3	48	3	-1.5596	47.82	17.95	968.407	C115H193N16O69	1	86.28	18_adg_human_15ug_TR2_240615_f	45AI3,ZI3,YI3,	968.407	2902.21	968.409	1	31.95	01Y41Y41M(31M21M)61M(31M21M)61M21M	403.14	12	40
P23467_MVIVTHSGELSNESFIFGR_12_HexNAc(4)Hex(5)NeuAc(1)	36988	P23467	MVIVTHSGELSNESFIFGR	N12GlcNAc	4	N4H5F0S1	3	N,0;	0	1163	12	8.92024	40.78	18.59	1010.45	C167H267N30O82S1	1	175.9	20_Oesophagus_human_15ug_TR1_240618_f	03AI5,03AI5,35AI5,	1010.45	4036.74	1010.44	1	9.43	01Y41Y41M(31M41Y41L)61M61Y41L32S	403.07	8	16.67
Q9BVK6_FTFTSHTPGEHQICLHSNSTK_18_HexNAc(4)Hex(3)	20881	Q9BVK6	FTFTSHTPGEHQICLHSNSTK	C14CamN18GlcNAc	5	N4H3F0S0	0	N,10;	10	125	18	-0.291197	34.42	17.48	746.728	C155H240N35O69S1	1	100.46	02_RE_Liver_human_15ug_TR3_240613_f		746.728	3727.61	746.729	2	5.35	01Y41Y41M(31M41Y)61M61Y	402.89	30	75
P02675_GTAGNALMDGASQLMGENR_18_HexNAc(4)Hex(5)Fuc(2)NeuAc(1)	30601	P02675	GTAGNALMDGASQLMGENR	N18GlcNAc	4	N4H5F2S1	2	N,13;	13	394	18	-2.37776	44.83	26.52	1025.67	C159H265N30O90S2	1	146.47	19_Ovarian_human_15ug_TR3_240617_f	YII3,YII3,	1025.92	4098.65	1025.92	2	4.13	01Y41Y41M(31M(21Y(31F)41L32S)41Y31F)61M61M	402.88	41	105.56
P36269_GFNFSTESMARPEGR_3_HexNAc(4)Hex(5)Fuc(1)NeuAc(1)	23951	P36269	GFNFSTESMARPEGR	N3GlcNAc	3	N4H5F1S1	0	N,1;	1	303	3	1.81891	44.6	20.26	1249.84	C150H238N27O81S1	1	114.43	18_adg_human_15ug_TR2_240615_f		1249.84	3745.51	1249.84	1	9.12	01Y(61F)41Y41M(31M41Y41L)61M61Y41L32S	402.74	12	39.29
P13473_VQPFNVTQGK_5_HexNAc(3)Hex(4)NeuAc(1)	18152	P13473	VQPFNVTQGK	N5GlcNAc	2	N3H4F0S1	28	N,2;	2	356	5	2.00918	42.54	18.99	1334.08	C109H177N18O58	1	86.19	18_adg_human_15ug_TR1_240615_f	01AII1,BII1,BI1,CI1,35AI4,BI2,03AI5,CI2,35AI3,BI3,35AI4,ZI2,YI2,BI4,35AI5,YI3,YI4,YI5,YI6,02XI1,ZI1,YI1,ZI2,YI2,ZI3,YI3,YI4,YI5,	1334.08	2666.15	1334.08	1	0	01Y41Y41M(31M)61M61Y41L32S	402.61	19	94.44
P05556_KENSSEICSNNGECVCGQCVCR_3_HexNAc(2)Hex(8)	15127	P05556	KENSSEICSNNGECVCGQCVCR	N3GlcNAcC8CamC14CamC16CamC19CamC21Cam	3	N2H8F0S0	0	N,7;	7	520	3	2.83487	47.33	32.62	1451.55	C162H270N37O91S5	1	70.08	15_bigintes_human_15ug_TR1_240616_f		1451.22	4349.62	1451.21	1	7.22	01Y41Y41M(31M21M21M31G)61M(31M)61M	401.84	30	71.43
P24821_GPNCSEPECPGNCHLR_3_HexNAc(4)Hex(4)Fuc(1)	13485	P24821	GPNCSEPECPGNCHLR	N3GlcNAcC4CamC9CamC13Cam	3	N4H4F1S0	0	N,3;	3	184	3	-1.15934	45.43	26.11	1164.78	C135H217N30O71S3	1	62.3	15_bigintes_human_15ug_TR1_240616_f		1164.45	3490.35	1164.45	2	2.82	01Y41Y41M(31M41Y(31F)41L)61M61Y	401.51	25	76.67
O60656_YTGTRPSNLANNTILVK_11_HexNAc(2)Hex(5)	22591	O60656	YTGTRPSNLANNTILVK	N11GlcNAc	3	N2H5F0S0	16	N,6;	6	344	11	1.2793	39.71	13.14	1027.15	C127H213N26O61	1	105.73	20_Oesophagus_human_15ug_TR2_240618_f	BI1,BII1,BIII1,BI2,24AI4,04AI3,YI1,YI2,YI3,02XI1,BI4,ZI1,YI1,ZI2,YI2,YI3,YI4,YII4,YIII3,YI1,	1027.15	3078.44	1027.15	1	0	01Y41Y41M(31M)61M(31M)61M	401.5	26	78.13
P12109_NVTAQICIDKK_1_HexNAc(2)Hex(6)	17613	P12109	NVTAQICIDKK	N1GlcNAcC7Cam	3	N2H6F0S0	3	N,4;	4	804	1	-0.239294	36.92	15.4	890.394	C106H183N18O58S1	2	81.87	17_Prostate_human_15ug_TR3_240619_f	BI2,CI2,YI3,	890.394	2668.16	890.394	1	0	01Y41Y41M(31M21M)61M(31M)61M	401.39	26	115
P21810_LLQVVYLHSNNITK_11_HexNAc(5)Hex(4)Fuc(1)	24917	P21810	LLQVVYLHSNNITK	N11GlcNAc	3	N5H4F1S0	0	N,7;	7	311	11	1.63047	45.05	18.29	1151.87	C145H240N25O70	1	119.08	18_adg_human_15ug_TR2_240615_f		1151.54	3451.6	1151.54	2	0.91	01Y41Y41M(31M41Y41L31Y)61M61Y31F	401.38	27	96.15
Q15223_NPNGTVTVISR_3_HexNAc(2)Hex(5)	15149	Q15223	NPNGTVTVISR	N3GlcNAc	2	N2H5F0S0	18	N,8;	8	202	3	-2.2617	67.17	20.16	1188.03	C94H161N18O52	1	77.28	human_brain_14ug_TR3_0703_f	BI1,BII1,BIII1,BI2,14XI1,02XI1,ZI1,YI1,ZI2,YI2,YI3,BI4,ZI4,ZII4,ZIII3,YI4,YII4,YIII3,MH,02XI1,ZI1,YI1,YI2,YI3,	1188.03	2374.05	1188.03	1	0	01Y41Y41M(31M)61M(31M)61M	401.1	26	115
Q07954_LNGSFR_2_HexNAc(2)Hex(6)	11323	Q07954	LNGSFR	N2GlcNAc	2	N2H6F0S0	5	N,3;	3	1995	2	0.453926	83.18	24.69	1036.43	C82H135N12O49	2	52.85	02_RE_Liver_human_15ug_TR3_240613_f	BI2,ZI3,YI3,ZI3,YI3,	1036.43	2071.84	1036.43	1	0	01Y41Y41M(31M21M)61M(31M)61M	401.09	17	130
A0ZSE6_STQEIEINYTRICANCAK_8_HexNAc(2)Hex(7)	18637	A0ZSE6	STQEIEINYTRICANCAK	N8GlcNAcC13CamC16Cam	4	N2H7F0S0	5	N,0;	0	66	8	-0.174009	39.19	18.49	928.894	C147H244N29O77S2	1	95.46	human_brain_14ug_TR1_0703_f_new	BI2,BIII3,35AI3,YI3,YIII3,ZI3,ZIII3,YI3,YIII3,	929.145	3711.55	929.145	1	4.92	01Y41Y41M(31M21M21M)61M(31M)61M	400.91	6	17.65
P14625_HNNDTQHIWESDSNEFSVIADPR_3_HexNAc(2)Hex(7)	28535	P14625	HNNDTQHIWESDSNEFSVIADPR	N3GlcNAc	3	N2H7F0S0	4	N,8;	8	217	3	0.887696	60.32	25.28	1418.59	C173H264N37O87	1	138.49	02_RE_Liver_human_15ug_TR1_240613_f	BI2,BIII3,BI2,BIII3,YI3,YIII3,YI3,YIII3,	1418.59	4251.74	1418.59	2	9.94	01Y41Y41M(31M21M21M)61M(31M)61M	400.56	27	61.36
P01877_HYTNSSQDVTVPCR_4_HexNAc(4)Hex(5)Fuc(1)NeuAc(2)	15118	P01877	HYTNSSQDVTVPCR	N4GlcNAcC13Cam	3	N4H5F1S2	2	N,9;	9	92	4	1.48151	41.97	27.11	1339.54	C158H253N28O90S1	1	70.11	21_Bladder_human_15ug_TR2_240619_f	YI3,YI3,	1339.54	4014.58	1339.53	1	5.64	01Y41Y41M(31M)61M(21Y(31F)41L32S)61Y41L32S	399.73	25	88.46
P12821_NETHFDAGAK_1_HexNAc(2)Hex(7)	10432	P12821	NETHFDAGAK	N1GlcNAc	3	N2H7F0S0	3	N,8;	8	509	1	1.33987	53.13	32.5	877.682	C104H165N16O62	1	56.05	human_lung_14ug_TR2_0625_f	BI2,ZI3,YI3,	877.682	2630.03	877.681	1	5.25	01Y41Y41M(31M21M)61M(31M21M)61M	399.55	28	138.89
P00738_MVSHHNLTTGATLINEQWLLTTAK_6_HexNAc(4)Hex(5)NeuAc(1)	32386	P00738	MVSHHNLTTGATLINEQWLLTTAK	N6GlcNAc	4	N4H5F0S1	3	N,5;	5	184	6	1.40416	43.39	22.21	1149.53	C191H311N38O89S1	1	151.12	15_bigintes_human_15ug_TR1_240616_f	35AI5,03AI5,35AI5,	1149.53	4593.07	1149.52	1	8.58	01Y41Y41M(31M41Y41L)61M61Y41L32S	399.31	29	63.04
Q15293_VVRPDSELGERPPEDNQSFQYDHEAFLGK_16_HexNAc(2)Hex(5)	26741	Q15293	VVRPDSELGERPPEDNQSFQYDHEAFLGK	N16GlcNAc	5	N2H5F0S0	21	N,0;	0	53	16	1.64374	41.8	13.73	916.412	C193H296N43O85	1	124.77	17_Prostate_human_15ug_TR1_240619_f	03AI2,CI2,BI1,BII1,BIII1,BI2,BI3,03AI4,03AI2,CI2,25AI2,24AI4,BI2,YI2,02XI1,ZI1,YI1,YI2,YI3,YI4,YII4,YIII3,ZI1,YI1,YI2,	916.412	4576.02	916.411	1	0	01Y41Y41M(31M)61M(31M)61M	399.31	16	28.57
P16671_NYIVPILWLNETGTIGDEK_10_HexNAc(2)Hex(9)	39821	P16671	NYIVPILWLNETGTIGDEK	N10GlcNAc	3	N2H9F0S0	0	N,7;	7	417	10	2.8011	48.48	23.96	1347.93	C170H272N25O86	2	192.05	10_Fat_human_15ug_TR2_231011_f		1347.93	4039.77	1347.93	1	6.42	01Y41Y41M(31M21M21M31G)61M(31M21M)61M	399.21	30	80.56
Q8NHP8_RNQSLVQDMDSMVR_2_HexNAc(2)Hex(6)	27482	Q8NHP8	RNQSLVQDMDSMVR	N2GlcNAc	3	N2H6F0S0	6	N,9;	9	465	2	0.482088	60.42	24.72	1020.1	C118H202N25O64S2	1	131.55	18_adg_human_15ug_TR2_240615_f	BI2,BI2,04AI3,YI3,ZI3,YI3,	1020.1	3057.28	1020.1	1	12.22	01Y41Y41M(31M)61M(31M21M)61M	399.08	27	100
Q13449_VAWLNR_5_HexNAc(2)Hex(6)	17881	Q13449	VAWLNR	N5GlcNAc	2	N2H6F0S0	4	N,4;	4	66	5	-2.70647	87.66	25.07	1069.46	C87H142N13O48	1	90.99	human_brain_14ug_TR2_0703_f	BI2,ZI3,YI3,YI3,	1069.46	2136.91	1069.46	1	5.28	01Y41Y41M(31M21M)61M(31M)61M	398.95	13	110
P15144_NATLVNEADKLR_1_HexNAc(2)Hex(9)	18785	P15144	NATLVNEADKLR	N1GlcNAc	3	N2H9F0S0	0	N,5;	5	818	1	-0.811253	46.27	21.9	1070.79	C126H215N20O75	1	97.58	human_intestine_14ug_TR1_0704_f		1070.46	3208.36	1070.46	1	7.08	01Y41Y41M(31M21M21M)61M(31M21M)61M21M	398.58	26	100
A8MT70_RDFLNLCLR_5_HexNAc(2)Hex(6)	18446	A8MT70	RDFLNLCLR	N5GlcNAcC7Cam	3	N2H6F0S0	5	N,1;	1	457	5	-1.41029	40.92	14.06	862.711	C104H174N19O54S1	1	86.95	20_Oesophagus_human_15ug_TR1_240618_f	BI2,YI3,ZI3,YI3,YI3,	862.711	2585.12	862.712	1	14.45	01Y41Y41M(31M)61M(31M21M)61M	398.56	7	25
P02751_DQCIVDDITYNVNDTFHK_13_HexNAc(4)Hex(3)Fuc(1)	29026	P02751	DQCIVDDITYNVNDTFHK	C3CamN13GlcNAc	3	N4H3F1S0	0	N,9;	9	528	13	2.65579	41.1	19.43	1215.18	C150H234N29O73S1	1	139.73	15_bigintes_human_15ug_TR3_240616_f		1214.85	3641.52	1214.85	2	12.55	01Y41Y41M(31M41Y31F)61M61Y	398.31	31	88.24
Q96HD1_NASHLVCSACFGPCAR_1_HexNAc(2)Hex(6)	20676	Q96HD1	NASHLVCSACFGPCAR	N1GlcNAcC7CamC10CamC14Cam	3	N2H6F0S0	2	N,7;	7	205	1	1.47746	40.77	21.87	1063.09	C125H202N27O63S3	1	98.56	18_adg_human_15ug_TR2_240615_f	BI2,YI3,	1062.76	3185.26	1062.76	2	0	01Y41Y41M(31M21M)61M(31M)61M	398.04	31	96.67
P02679_VDKDLQSLEDILHQVENK_17_HexNAc(4)Hex(4)Fuc(2)	35631	P02679	VDKDLQSLEDILHQVENK	N17GlcNAc	4	N4H4F2S0	0	N,8;	8	78	17	-6.52498	28.25	14.67	970.187	C159H264N29O81	1	166.52	15_bigintes_human_15ug_TR1_240616_f		970.187	3875.74	970.193	1	4.64	01Y41Y41M(31M)61M(21Y(31F)41L21F)61Y	397.4	34	94.12
Q99523_HLYTTTGGETDFTNVTSLR_14_HexNAc(2)Hex(10)	23097	Q99523	HLYTTTGGETDFTNVTSLR	N14GlcNAc	3	N2H10F0S0	0	N,10;	10	406	14	0.912624	47.43	22.78	1381.58	C167H268N27O93	1	115.85	human_brain_14ug_TR2_0703_f		1381.24	4139.71	1381.24	1	4.27	01Y41Y41M(31M21M21M31G31G)61M(31M21M)61M	397.04	34	91.67
Q9UQ16_QVETIRNLVDSYMSIINK_17_HexNAc(4)Hex(5)NeuAc(1)	37658	Q9UQ16	QVETIRNLVDSYMSIINK	N17GlcNAc	4	N4H5F0S1	0	N,1;	1	674	17	-4.09906	43.39	19.87	1010.45	C165H275N30O83S1	1	179.3	21_Bladder_human_15ug_TR1_240619_f		1010.45	4036.79	1010.46	2	9.55	01Y41Y41M(31M)61M(21Y41L32S)61Y41L	397.04	9	20.59
Q16610_HIPGLIHNMTAR_8_HexNAc(2)Hex(7)	21739	Q16610	HIPGLIHNMTAR	N8GlcNAc	3	N2H7F0S0	4	N,5;	5	444	8	0.374778	39.34	16.36	968.096	C117H195N22O60S1	1	101.73	20_Oesophagus_human_15ug_TR2_240618_f	BI2,BIII3,YI3,YIII3,ZI3,ZIII3,YI3,YIII3,	967.76	2900.26	967.76	1	4.97	01Y41Y41M(31M21M21M)61M(31M)61M	396.69	17	72.73
Q9Y2G4_EKALNSTATQR_5_HexNAc(2)Hex(5)	12208	Q9Y2G4	EKALNSTATQR	N5GlcNAc	3	N2H5F0S0	19	N,0;	0	567	5	5.55062	52.32	20.77	812.699	C95H164N19O54	1	55.31	17_Prostate_human_15ug_TR1_240619_f	BI1,BII1,BIII1,BI2,YI2,YI3,02XI1,ZI1,YI1,14XI2,02XI2,YI4,YII4,YIII3,ZI2,YI2,ZI3,YI3,YI4,YII4,YIII3,02XI1,ZI1,YI1,YI2,	812.7	2435.07	812.695	1	0	01Y41Y41M(31M)61M(31M)61M	396.52	8	25
P49019_ITGEPDNNRSTSVELTGDPNK_20_HexNAc(2)Hex(6)	16485	P49019	ITGEPDNNRSTSVELTGDPNK	N20GlcNAc	3	N2H6F0S0	6	N,2;	2	336	20	-0.122457	35.77	15.83	1209.19	C143H237N30O78	1	78.1	16_Pancreas_human_15ug_TR1_240614_f	BI2,BI2,ZI3,YI3,ZI3,YI3,	1208.52	3622.55	1208.52	1	56.87	01Y41Y41M(31M21M)61M(31M)61M	396.27	7	15
P46977_VMSWWDYGYQITAMANR_16_HexNAc(2)Hex(9)	38321	P46977	VMSWWDYGYQITAMANR	N16GlcNAc	3	N2H9F0S0	0	N,12;	12	537	16	0.750017	41.91	18.21	1320.2	C165H251N26O81S2	1	187.49	16_Pancreas_human_15ug_TR2_240614_f		1320.2	3956.58	1320.2	1	5.57	01Y41Y41M(31M21M21M)61M(31M21M)61M21M	396.24	37	112.5
P13473_VQPFNVTQGK_5_HexNAc(2)Hex(5)	17630	P13473	VQPFNVTQGK	N5GlcNAc	2	N2H5F0S0	18	N,6;	6	356	5	0.892398	40.08	14.84	1168.02	C96H157N16O50	1	83.55	18_adg_human_15ug_TR2_240615_f	BI1,BII1,BIII1,CI1,CII1,CIII1,BI2,YI1,15XI2,02XI2,ZI2,YI2,24AI4,YI3,BI4,YI4,YII4,YIII3,MH,02XI1,ZI1,YI1,YI2,YI3,	1168.02	2334.02	1168.02	1	0	01Y41Y41M(31M)61M(31M)61M	396.17	24	116.67
P78504_RDGNSSLIAAVAEVR_4_HexNAc(2)Hex(8)	24864	P78504	RDGNSSLIAAVAEVR	N4GlcNAc	3	N2H8F0S0	3	N,0;	0	1045	4	8.47823	36.99	17.05	1087.82	C128H219N24O73	1	120.44	02_RE_Liver_human_15ug_TR2_240613_f	YI3,ZI3,YI3,	1087.82	3260.42	1087.81	1	27.92	01Y41Y41M(31M21M)61M(31M21M)61M21M	396.08	8	25
O43581_NLNPIFNESFAFDIPTEK_7_HexNAc(2)Hex(6)	26112	O43581	NLNPIFNESFAFDIPTEK	N7GlcNAc	3	N2H6F0S0	4	N,3;	3	334	7	4.6796	41.29	15.78	1159.18	C149H229N24O70	2	133.66	13_Heart_human_10ug_TR1_231111_f	BI2,BI2,YI3,YI3,	1159.18	3474.51	1159.18	1	0	01Y41Y41M(31M21M)61M(31M)61M	395.94	9	23.53
P11047_LLNNLTSIK_4_HexNAc(2)Hex(7)	21849	P11047	LLNNLTSIK	N4GlcNAc	2	N2H7F0S0	4	N,6;	6	650	4	1.89025	51.7	16.91	1279.08	C103H179N14O59	1	104.35	18_adg_human_15ug_TR1_240615_f	BI2,BI2,YI3,YI3,	1279.08	2556.14	1279.08	1	4.67	01Y41Y41M(31M21M)61M(31M21M)61M	395.59	22	118.75
Q96HE7_WGHNITEFQQR_4_HexNAc(2)Hex(9)	21357	Q96HE7	WGHNITEFQQR	N4GlcNAc	3	N2H9F0S0	1	N,8;	8	280	4	-0.967992	50.89	20.44	1094.78	C133H207N22O73	1	100.32	20_Oesophagus_human_15ug_TR3_240618_f	02AI2,02AIII3,	1094.44	3280.32	1094.44	2	4.36	01Y41Y41M(31M21M21M31G31G)61M(31M)61M	395.22	25	110
P55083_VDLEDFENNTAYAK_8_HexNAc(4)Hex(5)Fuc(1)NeuAc(1)	28318	P55083	VDLEDFENNTAYAK	N8GlcNAc	3	N4H5F1S1	0	N,5;	5	137	8	0.761537	42.83	20.35	1230.84	C150H235N22O84	1	136.07	10_Fat_human_15ug_TR3_231011_f		1230.5	3688.48	1230.5	2	5.79	01Y41Y41M(31M)61M(21Y(31F)41L32S)61Y41L	394.02	31	107.69
O75326_EDNPDKNPEAPLNVSR_13_HexNAc(2)Hex(8)	18615	O75326	EDNPDKNPEAPLNVSR	N13GlcNAc	3	N2H8F0S0	1	N,9;	9	258	13	2.49767	46.21	20.27	1166.82	C138H226N25O79	1	95.86	12_Tetis_human_8ug_TR1_231109_f	04AI3,	1166.82	3497.44	1166.82	2	11.48	01Y41Y41M(31M21M21M)61M(31M21M)61M	393.75	27	83.33
P05783_IVDGKVVSETNDTK_11_HexNAc(2)Hex(6)	11261	P05783	IVDGKVVSETNDTK	N11GlcNAc	3	N2H6F0S0	4	N,2;	2	423	11	0.33042	48.12	17.88	962.094	C115H196N19O65	1	52.54	02_RE_Liver_human_15ug_TR3_240613_f	BI2,YI3,ZI3,YI3,	962.094	2883.26	962.093	1	14.95	01Y41Y41M(31M)61M(31M21M)61M	393.62	9	26.92
Q9H0Q0_TLPIENTTDCLSTMTSVCK_6_HexNAc(2)Hex(7)	19238	Q9H0Q0	TLPIENTTDCLSTMTSVCK	N6GlcNAcC10CamC18Cam	4	N2H7F0S0	5	N,1;	1	218	6	4.6216	36.76	15.3	928.893	C146H248N25O79S3	1	97.3	human_brain_14ug_TR2_0703_f	BI2,BI2,YI3,YI3,YI3,	929.144	3711.53	929.14	1	7.07	01Y41Y41M(31M21M)61M(31M21M)61M	393.55	6	16.67
P16278_NNVITLNITGK_7_HexNAc(2)Hex(6)	24371	P16278	NNVITLNITGK	N7GlcNAc	2	N2H6F0S0	3	N,5;	5	464	7	2.72496	50.25	16.65	1283.59	C103H178N17O57	1	116.35	18_adg_human_15ug_TR3_240615_f	CI2,BI2,YI3,	1283.59	2565.16	1283.58	2	0	01Y41Y41M(31M21M)61M(31M)61M	393.23	25	110
P25440_RLQDVSGQLNSTK_10_HexNAc(2)Hex(6)	24537	P25440	RLQDVSGQLNSTK	N10GlcNAc	3	N2H6F0S0	5	N,1;	1	748	10	4.22229	40.59	18.07	942.426	C111H191N22O62	1	124.61	human_kidney_9ug_TR3_0701_f	BI2,BI2,YI3,ZI3,YI3,	942.426	2824.25	942.422	1	14.85	01Y41Y41M(31M)61M(31M21M)61M	393.16	8	20.83
P05164_SCPACPGSNITIR_9_HexNAc(2)Hex(7)	19104	P05164	SCPACPGSNITIR	C2CamC5CamN9GlcNAc	2	N2H7F0S0	4	N,6;	6	323	9	2.31477	57.14	21.45	1488.11	C115H194N21O65S2	1	96.49	11_Spleen_human_15ug_TR2_231108_f	35AI3,ZI3,YI3,YI3,	1487.61	2973.2	1487.6	1	4.79	01Y41Y41M(31M)61M(31M21M)61M21M	392.47	24	87.5
P31629_SKSFDYGNLSHAPVSGAAASTVSPSR_8_HexNAc(2)Hex(5)	21228	P31629	SKSFDYGNLSHAPVSGAAASTVSPSR	N8GlcNAc	3	N2H5F0S0	18	N,0;	0	1055	8	0.142479	22.04	10.58	1271.39	C157H250N35O74	1	101.92	16_Pancreas_human_15ug_TR3_240614_f	01AI1,01AII1,01AIII1,BI1,BII1,BIII1,BI2,CI1,CII1,CIII1,BI2,45AI3,ZI1,YI1,YI2,BI4,YI3,YI4,YII4,YIII3,14XI1,02XI1,ZI1,YI1,YI2,YI3,	1271.24	3809.69	1271.24	1	0	01Y41Y41M(31M)61M(31M)61M	391.79	7	14
O14594_ANATLLLGPLR_2_HexNAc(2)Hex(5)	25870	O14594	ANATLLLGPLR	N2GlcNAc	2	N2H5F0S0	17	N,4;	4	122	2	-0.76504	65.71	14.56	1178.56	C97H168N17O49	1	130.4	human_brain_14ug_TR1_0703_f_new	BI1,BII1,BIII1,CI1,CII1,CIII1,BI2,02XI1,ZI1,YI1,ZI2,YI2,ZI3,YI3,BI4,YI4,YII4,YIII3,02XI1,ZI1,YI1,YI2,YI3,	1178.56	2355.12	1178.56	1	0	01Y41Y41M(31M)61M(31M)61M	391.77	22	95
P11117_YEQLQNETR_6_HexNAc(2)Hex(8)	11077	P11117	YEQLQNETR	N6GlcNAc	2	N2H8F0S0	0	N,4;	4	167	6	-0.152835	75.52	31.69	1443.08	C113H184N17O69	2	51.41	18_adg_human_15ug_TR3_240615_f		1442.58	2883.14	1442.58	1	7.7	01Y41Y41M(31M21M21M)61M(31M21M)61M	391.73	20	106.25
P14625_HNNDTQHIWESDSNEFSVIADPR_3_HexNAc(4)Hex(3)Fuc(1)	28643	P14625	HNNDTQHIWESDSNEFSVIADPR	N3GlcNAc	3	N4H3F1S0	0	N,9;	9	217	3	0.598626	53.97	29.09	1386.59	C171H260N39O81	1	139.01	02_RE_Liver_human_15ug_TR1_240613_f		1386.59	4155.74	1386.59	1	6.8	01Y41Y41M(31M41Y31F)61M61Y	391.4	27	61.36
P02675_GTAGNALMDGASQLMGENR_18_HexNAc(4)Hex(4)NeuAc(1)	30978	P02675	GTAGNALMDGASQLMGENR	N18GlcNAc	3	N4H4F0S1	5	N,11;	11	394	18	3.47479	62.51	26.11	1216.17	C141H235N30O77S2	1	147.06	19_Ovarian_human_15ug_TR1_240617_f	15AII2,01AII2,BII2,CII2,35AI5,	1215.84	3644.48	1215.83	1	8.13	01Y41Y41M(31M41Y)61M61Y41L32S	391.1	36	94.44
P09172_ALYSFAPISMHCNK_13_HexNAc(2)Hex(8)	27118	P09172	ALYSFAPISMHCNK	C12CamN13GlcNAc	3	N2H8F0S0	0	N,10;	10	566	13	1.30443	33.59	14.34	1115.13	C137H218N21O70S2	2	129.77	18_adg_human_15ug_TR3_240615_f		1114.79	3341.36	1114.79	2	0	01Y41Y41M(31M21M21M31G)61M(31M)61M	391.09	29	103.85
P01591_ENISDPTSPLR_2_HexNAc(2)Hex(6)	17769	P01591	ENISDPTSPLR	N2GlcNAc	2	N2H6F0S0	5	N,4;	4	71	2	-0.238701	61.82	21.6	1304.55	C103H172N17O60	1	92.56	human_intestine_14ug_TR1_0704_f	25AI2,BI2,ZI3,YI3,YI3,	1304.55	2607.09	1304.55	1	12.4	01Y41Y41M(31M21M)61M(31M)61M	390.98	23	95
P01861_EEQFNSTYR_5_HexNAc(5)Hex(3)Fuc(1)	15372	P01861	EEQFNSTYR	N5GlcNAc	2	N5H3F1S0	0	N,3;	3	177	5	1.85764	56.04	23.8	1411.57	C114H178N19O63	1	71.34	21_Bladder_human_15ug_TR2_240619_f		1411.57	2821.13	1411.57	1	2.87	01Y41Y41M(31M41Y)61M(21Y31F)61Y	390.93	17	87.5
Q13061_KESLQLHNVTK_8_HexNAc(2)Hex(4)	17305	Q13061	KESLQLHNVTK	N8GlcNAc	3	N2H4F0S0	18	N,15;	15	647	8	1.88743	45.8	19.72	784.707	C96H164N19O48	1	85.21	14_Muscle_human_10ug_TR2_231113_f	BI1,BII1,BII2,BII2,BI2,YI1,YI2,YII3,02XI1,ZI1,YI1,ZI2,YI2,YII3,YI3,YII4,02XI1,ZI1,YI1,YI2,	784.707	2351.1	784.705	1	0	01Y41Y41M(31M21M)61M	390.91	26	120
P01876_LSLHRPALEDLLLGSEANLTCTLTGLR_18_HexNAc(4)Hex(4)NeuAc(1)	44148	P01876	LSLHRPALEDLLLGSEANLTCTLTGLR	N18GlcNAcC21Cam	4	N4H4F0S1	0	N,1;	1	144	18	1.4128	58.07	26.18	1180.32	C195H329N42O89S1	1	211.59	21_Bladder_human_15ug_TR1_240619_f		1180.06	4715.22	1180.06	1	11.53	01Y41Y41M(31M)61M(21Y41L32S)61Y	390.9	19	36.54
Q9UHL4_NLSASVIAVTIQGGAHHLDLR_1_HexNAc(2)Hex(5)	32473	Q9UHL4	NLSASVIAVTIQGGAHHLDLR	N1GlcNAc	4	N2H5F0S0	11	N,6;	6	428	1	-0.135873	25.98	17.75	848.16	C140H235N32O64	1	156.1	18_adg_human_15ug_TR3_240615_f	BI1,BII1,BIII1,BI2,03AI4,02XI1,ZI1,YI1,BI4,02XI1,ZI1,YI1,YI2,	848.159	3388.61	848.159	1	0	01Y41Y41M(31M)61M(31M)61M	390.72	36	90
P10253_QVVENMTR_5_HexNAc(2)Hex(3)	12191	P10253	QVVENMTR	N5GlcNAc	2	N2H3F0S0	15	N,3;	3	390	5	0.344795	76.99	23.2	934.907	C73H126N15O39S1	1	56.9	18_adg_human_15ug_TR2_240615_f	BI1,BII1,45AI2,ZI1,YI1,ZI2,BI3,YI2,ZI3,ZII3,YI3,YII3,MH,02XI1,YI1,YI2,ZI3,ZII3,YI3,YII3,	934.907	1868.81	934.907	1	0	01Y41Y41M(31M)61M	389.86	15	92.86
P08246_VVLGAHNLSR_7_HexNAc(3)Hex(4)NeuAc(1)	18476	P08246	VVLGAHNLSR	N7GlcNAc	3	N3H4F0S1	11	N,4;	4	88	7	3.66392	52.82	14.29	872.396	C105H177N20O56	1	93.47	11_Spleen_human_15ug_TR2_231108_f	02AI2,BI2,BI1,CI1,35AI4,BI2,CI2,35AI3,BI3,YI5,YI6,	872.396	2614.16	872.393	1	29.5	01Y41Y41M(31M)61M61Y41L32S	389.7	17	83.33
P02751_DQCIVDDITYNVNDTFHK_13_HexNAc(4)Hex(5)NeuAc(2)	31937	P02751	DQCIVDDITYNVNDTFHK	C3CamN13GlcNAc	3	N4H5F0S2	0	N,9;	9	528	13	2.83486	41.29	26.18	1468.6	C178H278N31O95S1	1	150.94	17_Prostate_human_15ug_TR2_240619_f		1468.6	4401.76	1468.59	2	29.63	01Y41Y41M(31M)61M(21Y41L32S)61Y41L32S	389.17	32	91.18
P56199_SQNDKFNVSLTVK_7_HexNAc(3)Hex(3)	23451	P56199	SQNDKFNVSLTVK	N7GlcNAc	3	N3H3F0S0	8	N,4;	4	840	7	0.589734	48.75	18.42	859.399	C106H176N21O52	1	109.82	17_Prostate_human_15ug_TR1_240619_f	BI1,CI1,45AI2,BI2,CI2,ZI3,YI3,YI4,	859.399	2575.18	859.398	1	40.94	01Y41Y41M(31M)61M61Y	388.85	26	100
Q9H9A7_NVSEQMTNEDKSFGCPSVR_1_HexNAc(2)Hex(5)	21848	Q9H9A7	NVSEQMTNEDKSFGCPSVR	N1GlcNAcC15Cam	3	N2H5F0S0	18	N,1;	1	377	1	7.4426	35.87	14.35	1134.81	C134H218N29O69S2	1	110.64	human_kidney_9ug_TR2_0701_f	BI1,BII1,BIII1,BI2,BI2,ZI1,YI1,ZI2,YI2,YI3,BI4,YI4,YII4,YIII3,14XI1,02XI1,ZI1,YI1,YI2,YI3,YI4,YII4,YIII3,YI1,	1134.81	3401.39	1134.8	1	0	01Y41Y41M(31M)61M(31M)61M	388.51	7	16.67
Q9Y4L1_AEPPLNASASDQGEK_6_HexNAc(2)Hex(5)	12776	Q9Y4L1	AEPPLNASASDQGEK	N6GlcNAc	2	N2H5F0S0	16	N,8;	8	931	6	-0.678078	39.3	23.9	1366.07	C108H177N20O61	1	60.15	18_adg_human_15ug_TR1_240615_f	BI1,BII1,BIII1,24AI4,BI2,02XI1,YI1,YI2,BI4,ZI3,YI3,ZI4,ZII4,ZIII3,YI4,YII4,YIII3,MH,02XI1,35XI1,ZI1,YI1,	1366.07	2730.14	1366.07	1	0	01Y41Y41M(31M)61M(31M)61M	388.49	31	100
P04233_YGNMTEDHVMHLLQNADPLK_3_HexNAc(2)Hex(6)	33448	P04233	YGNMTEDHVMHLLQNADPLK	N3GlcNAc	4	N2H6F0S0	4	N,6;	6	136	3	2.53477	45.4	18.31	927.402	C152H243N30O72S2	1	166.59	11_Spleen_human_15ug_TR2_231108_f	BI2,BI2,YI3,YI3,	927.402	3704.57	927.4	1	18.88	01Y41Y41M(31M)61M(31M21M)61M	388.42	26	68.42
Q07954_NSTTLVMHMK_1_HexNAc(2)Hex(5)	17381	Q07954	NSTTLVMHMK	N1GlcNAc	3	N2H5F0S0	15	N,6;	6	1825	1	0.26508	49.87	20.2	793.672	C94H161N16O50S2	1	82.38	18_adg_human_15ug_TR2_240615_f	BI1,BII1,BIII1,BI2,15XI1,14XI1,02XI1,ZI1,YI1,ZI2,YI2,ZI3,YI3,YI4,YII4,YIII3,02XI1,ZI1,YI1,	793.673	2378	793.672	1	0	01Y41Y41M(31M)61M(31M)61M	387.95	26	127.78
Q9UHL4_NLSASVIAVTIQGGAHHLDLR_1_HexNAc(2)Hex(8)	32164	Q9UHL4	NLSASVIAVTIQGGAHHLDLR	N1GlcNAc	4	N2H8F0S0	0	N,5;	5	428	1	0.633453	35.32	20.17	969.95	C158H265N32O79	1	154.64	18_adg_human_15ug_TR2_240615_f		969.95	3874.77	969.95	2	1.86	01Y41Y41M(31M21M)61M(31M21M)61M21M	387.41	32	80
Q9BTY2_SQNDTVTPDVWYTSKPK_3_HexNAc(2)Hex(3)	22829	Q9BTY2	SQNDTVTPDVWYTSKPK	N3GlcNAc	3	N2H3F0S0	15	N,4;	4	377	3	0.474076	39.73	14.66	954.098	C121H189N24O55	1	108.95	18_adg_human_15ug_TR3_240615_f	BI1,BII1,BI2,03AI2,CI2,34AI3,BI3,YI1,YI2,YI3,YII3,02XI1,ZI1,YI1,YI2,YI3,YII3,YI1,	953.764	2858.27	953.764	1	0	01Y41Y41M(31M)61M	387.16	24	71.88
P07602_NSTKQEILAALEK_1_HexNAc(2)Hex(3)Fuc(1)	25333	P07602	NSTKQEILAALEK	N1GlcNAc	3	N2H3F1S0	10	N,9;	9	426	1	1.07856	26.96	14.19	828.732	C102H176N19O51	1	121.08	18_adg_human_15ug_TR1_240615_f	BI1,BII1,BI2,02XI1,ZI1,YI1,ZI2,YI2,YI3,YII3,02XI1,YI1,	828.732	2483.18	828.731	1	0	01Y(61F)41Y41M(31M)61M	387.07	33	129.17
P02790_ALPQPQNVTSLLGCTH_7_HexNAc(4)Hex(5)NeuAc(2)	31679	P02790	ALPQPQNVTSLLGCTH	N7GlcNAcC14Cam	3	N4H5F0S2	0	N,3;	3	453	7	2.59356	42.01	23.02	1314.89	C158H259N28O85S1	1	150.03	21_Bladder_human_15ug_TR3_240619_f		1314.89	3940.65	1314.89	1	24.66	01Y41Y41M(31M)61M(21Y41L32S)61Y41L32S	387.05	28	83.33
P07585_IADTNITSIPQGLPPSLTELHLDGNK_5_HexNAc(4)Hex(5)NeuAc(1)	35458	P07585	IADTNITSIPQGLPPSLTELHLDGNK	N5GlcNAc	4	N4H5F0S1	3	N,6;	6	211	5	1.44365	40.34	19.01	1165.79	C193H318N37O94	1	170.04	10_Fat_human_15ug_TR3_231011_f	03AI5,03AI5,35AI5,	1165.79	4658.12	1165.79	1	9.58	01Y41Y41M(31M41Y41L)61M61Y41L32S	386.94	35	70
P01591_ENISDPTSPLR_2_HexNAc(2)Hex(7)	17767	P01591	ENISDPTSPLR	N2GlcNAc	2	N2H7F0S0	5	N,4;	4	71	2	0.353846	65.18	23.31	1385.58	C109H182N17O65	1	92.55	human_intestine_14ug_TR1_0704_f	25AI2,BI2,BIII3,ZI3,ZIII3,YI3,YIII3,YI3,YIII3,	1385.58	2769.15	1385.58	1	7.44	01Y41Y41M(31M21M21M)61M(31M)61M	386.78	22	95
Q6ZMZ3_AVVEKVNGCLGR_7_HexNAc(2)Hex(6)	27577	Q6ZMZ3	AVVEKVNGCLGR	N7GlcNAcC9Cam	2	N2H6F0S0	5	N,0;	0	244	7	3.12206	53.73	15.98	1341.1	C106H183N20O57S1	1	133.78	02_RE_Liver_human_15ug_TR3_240613_f	25AI2,BI2,ZI3,YI3,YI3,	1341.1	2680.18	1341.09	1	9.76	01Y41Y41M(31M21M)61M(31M)61M	386.32	8	27.27
O95302_YHYNGTLLDGTLFDSSYSR_4_HexNAc(2)Hex(9)	32030	O95302	YHYNGTLLDGTLFDSSYSR	N4GlcNAc	3	N2H9F0S0	0	N,10;	10	286	4	4.08975	46.8	24.29	1359.23	C169H258N27O88	1	153.84	18_adg_human_15ug_TR1_240615_f		1359.23	4073.65	1359.23	1	17.32	01Y41Y41M(31M21M21M31G)61M(31M21M)61M	385.85	34	91.67
P49454_AKEQNLSSQVECLELEK_5_HexNAc(2)Hex(9)	16102	P49454	AKEQNLSSQVECLELEK	N5GlcNAcC12Cam	4	N2H9F0S0	0	N,2;	2	2470	5	6.31767	29.82	16.39	968.669	C153H258N25O87S1	1	76.8	02_RE_Liver_human_15ug_TR1_240613_f		968.67	3869.63	968.663	2	19.36	01Y41Y41M(31M21M21M31G31G)61M(31M)61M	385.8	6	18.75
P32004_THNLTDLSPHLR_3_HexNAc(2)Hex(5)	21245	P32004	THNLTDLSPHLR	N3GlcNAc	3	N2H5F0S0	15	N,5;	5	979	3	-0.146865	40.37	13.81	874.059	C106H175N22O54	1	99.22	17_Prostate_human_15ug_TR1_240619_f	BI1,BII1,BIII1,BI2,YI1,YI2,YI3,02XI1,ZI1,YI1,ZI2,YI2,YI3,YI4,YII4,YIII3,02XI1,ZI1,YI1,	874.393	2620.16	874.394	1	0	01Y41Y41M(31M)61M(31M)61M	385.56	26	104.55
O14672_NISQVLEK_1_HexNAc(2)Hex(6)	18342	O14672	NISQVLEK	N1GlcNAc	2	N2H6F0S0	6	N,6;	6	439	1	0.778021	48.02	14.56	1155.51	C92H158N13O54	1	87.33	04_Stomach_human_15ug_TR2_240614_f	BI2,BI2,04AI3,ZI3,YI3,YI3,	1155.51	2309	1155.51	1	8.61	01Y41Y41M(31M)61M(31M21M)61M	384.72	22	135.71
Q9HDC9_AGPNGTLFVADAYK_4_HexNAc(2)Hex(3)Fuc(1)	27306	Q9HDC9	AGPNGTLFVADAYK	N4GlcNAc	2	N2H3F1S0	12	N,6;	6	160	4	1.50323	22.45	11.55	1232.06	C105H165N18O49	1	131.65	10_Fat_human_15ug_TR2_231011_f	01AI1,01AII1,BI1,BII1,BI3,CI3,02XI1,YI1,25XI2,YI2,YI3,YII3,02XI1,ZI1,YI1,	1232.06	2462.1	1232.05	1	0	01Y(61F)41Y41M(31M)61M	384.38	33	115.38
P01859_EEQFNSTFR_5_HexNAc(4)Hex(5)Fuc(1)	18728	P01859	EEQFNSTFR	N5GlcNAc	2	N4H5F1S0	0	N,1;	1	176	5	1.6605	40.6	33.42	1464.09	C118H185N18O67	1	87.01	17_Prostate_human_15ug_TR2_240619_f		1464.09	2926.16	1464.09	2	7.83	01Y41Y41M(31M41Y(31F)41L)61M61Y41L	384.26	13	62.5
Q8TCJ2_AMSSNETAAYK_5_HexNAc(2)Hex(9)	10705	Q8TCJ2	AMSSNETAAYK	N5GlcNAc	2	N2H9F0S0	0	N,15;	15	641	5	0.265394	72.87	23.02	1519.58	C118H194N15O74S1	1	49.72	02_RE_Liver_human_15ug_TR1_240613_f		1519.59	3037.16	1519.59	1	4.62	01Y41Y41M(31M21M21M31G31G)61M(31M)61M	383.97	29	130
P50897_NHSIFLADINQER_1_HexNAc(2)Hex(7)	23722	P50897	NHSIFLADINQER	N1GlcNAc	3	N2H7F0S0	2	N,6;	6	197	1	1.00802	37.49	16.09	1033.44	C125H202N23O67	1	113.34	18_adg_human_15ug_TR2_240615_f	ZI3,YI3,	1033.44	3097.31	1033.44	1	4.09	01Y41Y41M(31M)61M(31M21M)61M21M	383.69	26	95.83
Q99715_NLQVYNATSNSLTVK_6_HexNAc(2)Hex(5)	23462	Q99715	NLQVYNATSNSLTVK	N6GlcNAc	2	N2H5F0S0	12	N,6;	6	1763	6	0.978878	44.38	21.32	1435.15	C117H195N22O60	1	111.84	19_Ovarian_human_15ug_TR3_240617_f	BI1,BII1,BIII1,BI2,ZI1,YI1,BI4,ZI2,YI2,YI3,YI4,YII4,YIII3,02XI1,ZI1,YI1,	1435.15	2868.29	1435.15	1	0	01Y41Y41M(31M)61M(31M)61M	383.49	32	103.57
O60568_EQYIHENYSR_7_HexNAc(2)Hex(6)	14529	O60568	EQYIHENYSR	N7GlcNAc	3	N2H6F0S0	4	N,5;	5	548	7	0.26212	58.27	24.78	906.366	C110H170N19O60	1	68.49	18_adg_human_15ug_TR2_240615_f	BI2,CI2,ZI3,YI3,	906.701	2717.08	906.701	1	10.03	01Y41Y41M(31M21M)61M(31M)61M	383.41	20	94.44
Q96I59_DALGAQNASGERIK_7_HexNAc(2)Hex(4)	18283	Q96I59	DALGAQNASGERIK	N7GlcNAc	3	N2H4F0S0	21	N,0;	0	38	7	8.88715	31.8	10.22	829.05	C98H167N22O52	1	95.55	human_intestine_14ug_TR2_0704_f_new	BI1,BII1,BII2,BI2,01AII2,BII2,BI2,CII2,YI1,YI2,YII3,ZI3,ZII4,YI3,YII4,ZI1,YI1,MH,YI2,ZII3,YII3,YI3,YII4,YI1,YI2,	829.05	2484.11	829.043	1	0	01Y41Y41M(31M21M)61M	383.39	7	23.08
P07585_IADTNITSIPQGLPPSLTELHLDGNK_5_HexNAc(4)Hex(5)	34444	P07585	IADTNITSIPQGLPPSLTELHLDGNK	N5GlcNAc	3	N4H5F0S0	0	N,4;	4	211	5	3.1298	36.49	21.07	1457.02	C182H301N36O86	1	165.79	10_Fat_human_15ug_TR2_231011_f		1457.02	4367.03	1457.02	1	49.39	01Y41Y41M(31M41Y41L)61M61Y41L	383.36	35	68
P55083_FNGSVSFFR_2_HexNAc(2)Hex(8)	28170	P55083	FNGSVSFFR	N2GlcNAc	2	N2H8F0S0	0	N,2;	2	87	2	1.64909	61.17	15.63	1382.56	C114H176N15O63	1	143.19	12_Tetis_human_8ug_TR1_231109_f		1382.56	2763.1	1382.56	2	6.76	01Y41Y41M(31M21M21M)61M(31M21M)61M	383.28	19	93.75
Q99538_SHTNTSHVMQYGNK_4_HexNAc(3)Hex(3)	11168	Q99538	SHTNTSHVMQYGNK	N4GlcNAc	3	N3H3F0S0	1	N,8;	8	263	4	-0.438215	54.52	32.72	900.38	C108H172N25O53S1	1	52.05	02_RE_Liver_human_15ug_TR1_240613_f	45AI2,	900.714	2699.13	900.714	1	6.51	01Y41Y41M(31M)(41Y)61M	383.11	32	115.38
Q13683_KNITLDCAR_2_HexNAc(2)Hex(5)	13994	Q13683	KNITLDCAR	N2GlcNAcC7Cam	2	N2H5F0S0	17	N,4;	4	989	2	-0.141004	65.29	17.43	1154.5	C90H156N17O50S1	1	63.98	17_Prostate_human_15ug_TR1_240619_f	BI1,BII1,BIII1,BI2,02XI1,ZI1,YI1,02XI2,YI2,YI3,BI4,YI4,YII4,YIII3,MH,02XI1,ZI1,YI1,ZI2,YI2,YI3,	1154.5	2306.99	1154.5	1	0	01Y41Y41M(31M)61M(31M)61M	382.54	24	125
P29622_TTPKDFYVDENTTVR_11_HexNAc(5)Hex(4)	15377	P29622	TTPKDFYVDENTTVR	N11GlcNAc	4	N5H4F0S0	1	N,1;	1	238	11	3.16616	45.06	19.61	863.628	C142H226N25O73	1	71.27	15_bigintes_human_15ug_TR1_240616_f	34AII4,	863.378	3449.47	863.375	1	43.1	01Y41Y41M(31M41Y41L31Y)61M61Y	382.37	6	17.86
Q96QG7_EDEKLINATLR_7_HexNAc(2)Hex(7)	27384	Q96QG7	EDEKLINATLR	N7GlcNAc	2	N2H7F0S0	6	N,1;	1	222	7	-0.353427	51.24	15.71	1422.12	C113H193N18O65	1	132.92	02_RE_Liver_human_15ug_TR2_240613_f	BI2,03AI3,BI2,ZI3,YI3,YI3,	1422.12	2842.24	1422.12	1	4.86	01Y41Y41M(31M21M)61M(31M21M)61M	382.29	10	35
Q08380_AAIPSALDTNSSK_10_HexNAc(2)Hex(5)	19534	Q08380	AAIPSALDTNSSK	N10GlcNAc	2	N2H5F0S0	18	N,6;	6	551	10	-1.62653	38.1	12.66	1246.54	C99H168N17O56	1	95.18	10_Fat_human_15ug_TR3_231011_f	BI1,BII1,BIII1,03AI2,CI2,01AI3,24AI4,BI2,ZI1,YI1,02XI2,25XI2,ZI2,YI2,YI3,BI4,YI4,YII4,YIII3,ZI1,YI1,YI2,	1246.54	2491.08	1246.55	1	0	01Y41Y41M(31M)61M(31M)61M	382.18	28	104.17
P01591_ENISDPTSPLR_2_HexNAc(2)Hex(8)	17505	P01591	ENISDPTSPLR	N2GlcNAc	2	N2H8F0S0	1	N,5;	5	71	2	-1.19991	66.48	22.95	1466.6	C115H192N17O70	2	91.7	human_intestine_14ug_TR2_0704_f_new	25AI2,	1466.6	2931.2	1466.6	1	9.62	01Y41Y41M(31M21M21M)61M(31M21M)61M	382.15	24	105
Q5XPI4_KFLQENASGR_6_HexNAc(2)Hex(6)	13428	Q5XPI4	KFLQENASGR	N6GlcNAc	3	N2H6F0S0	4	N,2;	2	538	6	2.80989	31.93	12.75	843.367	C101H167N18O56	1	62.99	18_adg_human_15ug_TR3_240615_f	BI2,YI3,ZI3,YI3,	843.701	2528.08	843.698	1	2.44	01Y41Y41M(31M)61M(31M21M)61M	381.89	9	33.33
Q13061_ESLQLHNVTK_7_HexNAc(2)Hex(6)	17388	Q13061	ESLQLHNVTK	N7GlcNAc	3	N2H6F0S0	3	N,15;	15	647	7	0.737192	43.74	18.5	849.708	C102H172N17O57	1	89.15	14_Muscle_human_10ug_TR1_231113_f	BI2,ZI3,YI3,	850.043	2547.11	850.042	1	9.28	01Y41Y41M(31M)61M(31M21M)61M	381	25	122.22
P16444_ANLSQVADHLDHIK_2_HexNAc(3)Hex(5)NeuAc(1)	27207	P16444	ANLSQVADHLDHIK	N2GlcNAc	4	N3H5F0S1	9	N,7;	7	279	2	1.70693	43.89	20.75	819.11	C132H216N25O70	1	138.47	12_Tetis_human_8ug_TR2_231109_f	02AII2,BII2,BII3,02AII4,BII1,CII1,35AII4,35AII3,BII3,	818.861	3271.41	818.859	1	8	01Y41Y41M(31M41Y41L32S)61M61M	380.59	29	103.85
P04114_FVEGSHNSTVSLTTK_7_HexNAc(3)Hex(5)NeuAc(1)	16260	P04114	FVEGSHNSTVSLTTK	N7GlcNAc	3	N3H5F0S1	29	N,18;	18	3411	7	1.23969	51.16	24.66	1107.14	C134H218N23O73	1	77.15	18_adg_human_15ug_TR1_240615_f	03AI2,02AII2,BII2,BI1,BI2,BII1,CII1,BI2,35AII4,BII2,CII2,35AII3,BII3,35AII4,02XI1,ZI1,YI1,02XI2,ZI2,YI2,YII3,24XII4,YII4,YII5,YII6,02XI1,ZI1,YI1,YI2,	1106.81	3317.41	1106.81	1	0	01Y41Y41M(31M41Y41L32S)61M61M	380.59	28	92.86
P98160_IQGEEIVFHDLNLTAHGISHCPTCR_12_HexNAc(4)Hex(5)Fuc(1)NeuAc(1)	33235	P98160	IQGEEIVFHDLNLTAHGISHCPTCR	N12GlcNAcC21CamC24Cam	5	N4H5F1S1	0	N,0;	0	3836	12	2.3689	33.91	22.87	994.034	C203H324N43O96S2	1	157.78	17_Prostate_human_15ug_TR3_240619_f		994.034	4964.12	994.032	1	20.63	01Y41Y41M(31M)61M(21Y41L32S)61Y(31F)41L	380.56	19	39.58
Q96QG7_EDEKLINATLR_7_HexNAc(2)Hex(8)	27216	Q96QG7	EDEKLINATLR	N7GlcNAc	2	N2H8F0S0	0	N,1;	1	222	7	-0.207091	60.51	19.02	1503.15	C119H203N18O70	3	132.11	02_RE_Liver_human_15ug_TR2_240613_f		1503.15	3004.29	1503.15	1	0	01Y41Y41M(31M21M21M)61M(31M21M)61M	380.46	7	20
O15021_SFSCLNR_6_HexNAc(2)Hex(5)	12095	O15021	SFSCLNR	C4CamN6GlcNAc	2	N2H5F0S0	18	N,1;	1	1288	6	-1.23084	78.86	22.86	1050.92	C82H135N14O47S1	1	56.16	16_Pancreas_human_15ug_TR1_240614_f	BI1,BII1,BIII1,35AI2,BI2,BI2,ZI1,YI1,02XI2,ZI2,YI2,YI3,02XI1,YI4,YII4,YIII3,BI4,ZI1,YI1,ZI2,YI2,YI3,	1050.42	2099.83	1050.42	1	0	01Y41Y41M(31M)61M(31M)61M	380.4	7	33.33
P04114_FVEGSHNSTVSLTTK_7_HexNAc(4)Hex(5)NeuAc(1)	16350	P04114	FVEGSHNSTVSLTTK	N7GlcNAc	3	N4H5F0S1	0	N,10;	10	3411	7	2.61415	50.06	24.67	1174.84	C142H231N24O78	1	77.39	18_adg_human_15ug_TR2_240615_f		1174.5	3520.48	1174.5	2	11.92	01Y41Y41M(31M)61M(21Y41L32S)61Y41L	380.37	24	78.57
P00734_YPHKPEINSTTHPGADLQENFCR_8_HexNAc(4)Hex(5)NeuAc(2)	23651	P00734	YPHKPEINSTTHPGADLQENFCR	N8GlcNAcC22Cam	4	N4H5F0S2	0	N,1;	1	143	8	1.53496	39.91	22.05	1230.27	C201H312N41O99S1	1	110.29	21_Bladder_human_15ug_TR1_240619_f		1230.27	4916.04	1230.27	2	80.53	01Y41Y41M(31M)61M(21Y41L32S)61Y41L32S	380.22	20	45.45
Q96KA5_TVNVSVPK_3_HexNAc(2)Hex(5)	15892	Q96KA5	TVNVSVPK	N3GlcNAc	2	N2H5F0S0	16	N,4;	4	91	3	-0.618382	63.06	17.86	1030.46	C83H143N12O47	1	75.45	16_Pancreas_human_15ug_TR3_240614_f	BI1,BII1,BIII1,CI1,CII1,CIII1,BI2,ZI1,YI1,ZI2,YI2,ZI3,YI3,02XI1,BI4,ZI1,YI1,ZI2,YI2,YI3,	1030.46	2059.92	1030.46	1	0	01Y41Y41M(31M)61M(31M)61M	380.21	19	114.29
P07996_VVNSTTGPGEHLR_3_HexNAc(5)Hex(4)	12586	P07996	VVNSTTGPGEHLR	N3GlcNAc	3	N5H4F0S0	0	N,3;	3	1067	3	-0.365984	62.65	35.9	1011.11	C121H201N24O65	1	58.66	19_Ovarian_human_15ug_TR3_240617_f		1011.11	3030.32	1011.11	1	34.75	01Y41Y41M(31M41Y41L31Y)61M61Y	380.02	21	70.83
Q13683_ALDPAEKPLCLSNENASHVECELGNPMKR_15_HexNAc(4)Hex(5)Fuc(1)	26022	Q13683	ALDPAEKPLCLSNENASHVECELGNPMKR	C10CamN15GlcNAcC21Cam	4	N4H5F1S0	0	N,0;	0	786	15	0.920526	43.91	26.17	1263.31	C204H336N45O96S3	1	120.63	15_bigintes_human_15ug_TR1_240616_f		1263.31	5048.2	1263.31	2	21.26	01Y41Y41M(31M41Y41L)61M61Y41L21F	379.75	19	33.93
Q16853_YLYLASNHSNK_7_HexNAc(4)Hex(5)Fuc(1)NeuAc(2)	18282	Q16853	YLYLASNHSNK	N7GlcNAc	3	N4H5F1S2	2	N,15;	15	592	7	1.64569	36.9	23.3	1221.5	C149H235N22O83	2	85.13	17_Prostate_human_15ug_TR3_240619_f	YI3,YI3,	1221.17	3660.48	1221.17	1	16.14	01Y41Y41M(31M)61M(21Y(31F)41L32S)61Y41L32S	379.52	26	115
Q9UKA4_THHTNTLSNINSIKHGENK_18_HexNAc(4)Hex(5)NeuAc(1)	35564	Q9UKA4	THHTNTLSNINSIKHGENK	N18GlcNAc	4	N4H5F0S1	3	N,3;	3	523	18	-2.03458	36.98	17.31	1015.94	C162H265N36O84	1	171.31	19_Ovarian_human_15ug_TR3_240617_f	03AI5,23XII3,23XII3,	1015.94	4058.76	1015.95	1	20.29	01Y41Y41M(31M41Y41L)61M61Y41L32S	378.84	8	19.44
Q9UQ16_QVETIRNLVDSYMSIINK_17_HexNAc(4)Hex(4)NeuAc(1)	37437	Q9UQ16	QVETIRNLVDSYMSIINK	N17GlcNAc	3	N4H4F0S1	4	N,2;	2	674	17	-2.37947	56.48	18.15	1292.58	C159H265N30O78S1	1	177.2	20_Oesophagus_human_15ug_TR2_240618_f	BII2,CII2,03AI5,35AI5,	1292.92	3874.74	1292.92	1	7.17	01Y41Y41M(31M41Y)61M61Y41L32S	378.77	12	29.41
Q9UHG3_LLHALGGDDFLGMLNR_15_HexNAc(2)Hex(7)	34277	Q9UHG3	LLHALGGDDFLGMLNR	N15GlcNAc	3	N2H7F0S0	1	N,12;	12	196	15	8.59454	41.28	17.31	1095.15	C135H221N24O67S1	1	164.99	18_adg_human_15ug_TR1_240615_f	YI3,	1095.16	3282.43	1095.15	2	22.2	01Y41Y41M(31M)61M(31M21M)61M21M	378.63	31	100
Q02040_STMDFIRFEGEVENK_14_HexNAc(4)Hex(5)NeuAc(1)	16064	Q02040	STMDFIRFEGEVENK	N14GlcNAc	3	N4H5F0S1	3	N,3;	3	85	14	9.91004	54.29	22.47	1239.52	C151H240N25O80S1	1	80.57	10_Fat_human_15ug_TR1_231011_f	03AI5,35AI5,45XI4,	1239.86	3715.52	1239.85	1	16.74	01Y41Y41M(31M41Y41L)61M61Y41L32S	378.59	8	21.43
P29622_TTPKDFYVDENTTVR_11_HexNAc(5)Hex(5)	15356	P29622	TTPKDFYVDENTTVR	N11GlcNAc	3	N5H5F0S0	1	N,1;	1	238	11	4.18024	52.6	24.52	1205.19	C148H236N25O78	1	71.17	15_bigintes_human_15ug_TR1_240616_f	34AII4,	1204.85	3611.53	1204.85	1	1.47	01Y41Y41M(31M41Y41L31Y)61M61Y41L	378.4	7	17.86
Q07954_FGTCSQLCNNTK_9_HexNAc(2)Hex(5)	14612	Q07954	FGTCSQLCNNTK	C4CamC8CamN9GlcNAc	2	N2H5F0S0	17	N,5;	5	3839	9	-0.209016	53.16	20.57	1324.02	C103H169N20O56S2	1	74.68	human_brain_14ug_TR3_0703_f	BI1,BII1,BIII1,25AI3,BI2,02XI1,ZI1,YI1,ZI2,YI2,BI4,ZI3,YI3,YI4,YII4,YIII3,MH,02XI1,ZI1,YI1,YI2,	1324.03	2646.04	1324.03	1	0	01Y41Y41M(31M)61M(31M)61M	378.39	27	109.09
Q9Y4L1_VINETWAWK_3_HexNAc(2)Hex(8)	26096	Q9Y4L1	VINETWAWK	N3GlcNAc	2	N2H8F0S0	0	N,12;	12	862	3	0.166849	52.86	17.38	1425.59	C119H186N15O64	1	124.82	18_adg_human_15ug_TR2_240615_f		1425.59	2849.18	1425.59	2	2.1	01Y41Y41M(31M21M21M31G)61M(31M)61M	378.2	25	137.5
P00734_YPHKPEINSTTHPGADLQENFCR_20_HexNAc(4)Hex(5)NeuAc(2)	21698	P00734	YPHKPEINSTTHPGADLQENFCR	N20GlcNAcC22Cam	4	N4H5F0S2	0	N,0;	0	155	20	1.43573	40.42	22.6	1230.27	C201H312N41O99S1	1	103.61	18_adg_human_15ug_TR1_240615_f		1230.27	4916.04	1230.27	1	0.12	01Y41Y41M(31M)61M(21Y41L32S)61Y41L32S	377.8	19	43.18
P01009_ADTHDEILEGLNFNLTEIPEAQIHEGFQELLR_14_HexNAc(4)Hex(5)NeuAc(2)	46064	P01009	ADTHDEILEGLNFNLTEIPEAQIHEGFQELLR	N14GlcNAc	4	N4H5F0S2	0	N,2;	2	107	14	1.63107	46.04	23.28	1475.66	C247H388N49O116	1	221.96	21_Bladder_human_15ug_TR3_240619_f_45282-		1475.66	5896.6	1475.66	1	19.81	01Y41Y41M(31M)61M(21Y41L32S)61Y41L32S	377.7	30	48.39
P10253_GVFITNETGQPLIGK_6_HexNAc(2)Hex(5)	25841	P10253	GVFITNETGQPLIGK	N6GlcNAc	2	N2H5F0S0	16	N,4;	4	470	6	2.72561	33.18	12.9	1396.15	C117H193N20O57	1	123.58	18_adg_human_15ug_TR1_240615_f	01AI1,01AII1,01AIII1,BI1,BII1,BIII1,CI3,25AI2,BI2,ZI1,YI1,ZI2,YI2,BI4,ZI3,YI3,YI4,YII4,YIII3,02XI1,ZI1,YI1,	1396.15	2790.28	1396.15	1	0	01Y41Y41M(31M)61M(31M)61M	377.48	29	92.86
P05546_NLSMPLLPADFHK_1_HexNAc(4)Hex(5)NeuAc(2)	33647	P05546	NLSMPLLPADFHK	N1GlcNAc	3	N4H5F0S2	0	N,3;	3	49	1	2.24316	38.16	19.37	1230.53	C152H244N23O79S1	1	159.16	21_Bladder_human_15ug_TR1_240619_f		1230.53	3687.55	1230.52	1	3.84	01Y41Y41M(31M)61M(21Y41L32S)61Y41L32S	377.36	25	91.67
P43897_DQPSAYSKGFLNSSELSGLPAGPDR_12_HexNAc(2)Hex(6)	20762	P43897	DQPSAYSKGFLNSSELSGLPAGPDR	N12GlcNAc	3	N2H6F0S0	5	N,0;	0	165	12	3.3817	29.72	12.51	1324.92	C164H260N33O80	1	98.62	04_Stomach_human_15ug_TR1_240614_f	BI2,BI2,45AI3,YI3,YI3,	1325.25	3971.73	1325.25	1	2.19	01Y41Y41M(31M21M)61M(31M)61M	377.19	7	14.58
P08575_SFHNFTLCYIK_4_HexNAc(4)Hex(5)NeuAc(2)	29456	P08575	SFHNFTLCYIK	N4GlcNAcC8Cam	3	N4H5F0S2	5	N,7;	7	421	4	3.16226	41.93	17.59	1212.83	C151H233N22O78S1	1	146.89	11_Spleen_human_15ug_TR2_231108_f	15AIII1,01AIII1,BIII1,YI3,YI3,	1212.5	3634.47	1212.49	1	1.09	01Y41Y41M(31M)61M(21Y41L32S)61Y41L32S	377.04	27	120
Q13683_KNITLDCAR_2_HexNAc(3)Hex(5)NeuAc(1)	14635	Q13683	KNITLDCAR	N2GlcNAcC7Cam	3	N3H5F0S1	11	N,3;	3	989	2	-0.647331	59.33	29.59	934.727	C109H186N19O63S1	1	66.91	17_Prostate_human_15ug_TR2_240619_f	02AII2,BII2,BII1,CII1,35AII4,BII2,35AII3,BII3,35AII4,YII5,YII6,	934.727	2801.17	934.728	1	42.81	01Y41Y41M(31M41Y41L32S)61M61M	376.96	20	112.5
A0A1W2PQ72_LGVSGEPSPCTSTNR_14_HexNAc(2)Hex(8)	14704	A0A1W2PQ72	LGVSGEPSPCTSTNR	C10CamN14GlcNAc	3	N2H8F0S0	3	N,1;	1	231	14	2.08904	42.35	15.77	1089.11	C126H211N22O75S1	1	69.75	02_RE_Liver_human_15ug_TR3_240613_f	YI3,ZI3,YI3,	1089.11	3264.31	1089.11	1	16.87	01Y41Y41M(31M21M)61M(31M21M)61M21M	376.88	8	21.43
P01903_FTPPVVNVTWLR_7_HexNAc(2)Hex(5)	34874	P01903	FTPPVVNVTWLR	N7GlcNAc	2	N2H5F0S0	18	N,5;	5	143	7	5.47095	41.39	15.54	1323.62	C115H182N19O51	1	173.66	11_Spleen_human_15ug_TR2_231108_f	BI1,BII1,BIII1,24AI4,BI2,YI1,14XI2,ZI2,YI2,BI4,ZI3,YI3,ZI4,ZII4,ZIII3,YI4,YII4,YIII3,MH,02XI1,ZI1,YI1,YI2,YI3,	1323.62	2645.22	1323.62	1	0	01Y41Y41M(31M)61M(31M)61M	376.24	21	81.82
Q86TD4_TNVSKFDLPNR_2_HexNAc(2)Hex(9)	21554	Q86TD4	TNVSKFDLPNR	N2GlcNAc	3	N2H9F0S0	0	N,6;	6	389	2	3.52218	53.93	23.72	1052.78	C126H208N19O73	1	111.14	13_Heart_human_10ug_TR1_231111_f		1052.78	3155.31	1052.78	1	12.27	01Y41Y41M(31M21M21M)61M(31M21M)61M21M	376.21	24	105
P51884_KLHINHNNLTESVGPLPK_8_HexNAc(4)Hex(5)Fuc(1)NeuAc(2)	23979	P51884	KLHINHNNLTESVGPLPK	N8GlcNAc	4	N4H5F1S2	2	N,1;	1	127	8	2.83051	34.85	20.88	1091.75	C179H294N33O91	1	117.5	10_Fat_human_15ug_TR1_231011_f	YI3,YI3,	1091.75	4361.94	1091.74	2	17.27	01Y41Y41M(31M)61M(21Y(31F)41L32S)61Y41L32S	376.01	19	52.94
Q99538_SHTNTSHVMQYGNK_4_HexNAc(4)Hex(5)	10817	Q99538	SHTNTSHVMQYGNK	N4GlcNAc	3	N4H5F0S0	0	N,8;	8	263	4	-0.164474	46.07	35.64	1076.44	C128H205N26O68S1	1	50.37	02_RE_Liver_human_15ug_TR2_240613_f		1076.44	3226.31	1076.44	1	9.33	01Y41Y41M(31M41Y41L)(41Y)61M61M	375.81	25	92.31
P01009_YLGNATAIFFLPDEGK_4_HexNAc(4)Hex(5)NeuAc(2)	37575	P01009	YLGNATAIFFLPDEGK	N4GlcNAc	3	N4H5F0S2	0	N,6;	6	271	4	0.819472	46.42	24.26	1321.56	C167H259N24O85	1	177.86	17_Prostate_human_15ug_TR1_240619_f		1321.56	3960.67	1321.56	1	13.02	01Y41Y41M(31M)61M(21Y41L32S)61Y41L32S	375.8	31	93.33
Q86UQ4_NLDSINDFLSNNLTNYGEK_12_HexNAc(2)Hex(7)	18548	Q86UQ4	NLDSINDFLSNNLTNYGEK	N12GlcNAc	4	N2H7F0S0	5	N,0;	0	1312	12	-1.46544	32.33	15.7	928.893	C151H240N27O80	1	95.03	human_brain_14ug_TR1_0703_f_new	03AI4,35AI3,YI3,YI3,YI3,	928.894	3711.55	928.895	2	2.38	01Y41Y41M(31M)61M(31M21M)61M21M	375.38	6	16.67
P07339_GSLSYLNVTR_7_HexNAc(2)Hex(10)	22231	P07339	GSLSYLNVTR	N7GlcNAc	2	N2H10F0S0	1	N,6;	6	263	7	-2.31574	67.1	22.81	1569.65	C124H207N16O76	1	106.15	18_adg_human_15ug_TR3_240615_f	45AI3,	1569.14	3136.28	1569.15	2	9.59	01Y41Y41M(31M21M21M31G)61M(31M21M)61M21M	375.11	25	116.67
P07602_NSTKQEILAALEK_1_HexNAc(2)Hex(4)Fuc(1)	25121	P07602	NSTKQEILAALEK	N1GlcNAc	3	N2H4F1S0	16	N,5;	5	426	1	1.04107	28.5	16.16	882.749	C108H186N19O56	1	120.05	18_adg_human_15ug_TR1_240615_f	01AI2,BI1,BII1,BI2,25AI2,BI2,BI3,02XI1,BI4,ZI1,YI1,ZI2,YI2,YI3,YI4,YII3,02XI1,YI1,	882.75	2645.23	882.749	1	0	01Y(61F)41Y41M(31M)61M61M	374.49	29	112.5
Q07954_WTGHNVTVVQR_5_HexNAc(2)Hex(9)	15141	Q07954	WTGHNVTVVQR	N5GlcNAc	3	N2H9F0S0	0	N,6;	6	1511	5	1.11467	57.19	27.4	1055.11	C127H206N21O71	1	72.07	02_RE_Liver_human_15ug_TR2_240613_f		1054.78	3161.32	1054.78	1	9.55	01Y41Y41M(31M21M21M)61M(31M21M)61M21M	374.3	22	95
P06731_ITPNNNGTYACFVSNLATGR_6_HexNAc(2)Hex(6)	18566	P06731	ITPNNNGTYACFVSNLATGR	N6GlcNAcC11Cam	4	N2H6F0S0	6	N,3;	3	650	6	-5.24853	37.78	11.3	888.38	C144H231N30O71S1	1	95.12	human_brain_14ug_TR1_0703_f_new	BI2,BI2,BI2,04AI3,YI3,YI3,	888.13	3548.51	888.134	1	4.42	01Y41Y41M(31M)61M(31M21M)61M	373.94	6	15.79
P27987_LNSSSGSGSGSSGSSVSSPSWAGR_2_HexNAc(2)Hex(6)	21349	P27987	LNSSSGSGSGSSGSSVSSPSWAGR	N2GlcNAc	3	N2H6F0S0	4	N,1;	1	83	2	4.68055	31.82	12.93	1189.16	C138H224N31O78	1	109.05	human_kidney_9ug_TR1_0701_f	BI2,BI2,YI3,YI3,	1188.83	3563.45	1188.82	1	4.64	01Y41Y41M(31M)61M(31M21M)61M	373.88	8	15.22
P05556_LRNPCTSEQNCTSPFSYK_10_HexNAc(4)Hex(5)Fuc(1)NeuAc(1)	20498	P05556	LRNPCTSEQNCTSPFSYK	C5CamN10GlcNAcC11Cam	3	N4H5F1S1	0	N,6;	6	212	10	-1.1199	40.51	26.03	1417.58	C170H271N32O89S2	1	94.88	15_bigintes_human_15ug_TR1_240616_f		1417.58	4248.71	1417.58	2	11.2	01Y41Y41M(31M)61M(21Y(31F)41L32S)61Y41L	373.62	26	70.59
O75629_VNETEMDIAK_2_HexNAc(2)Hex(8)	15934	O75629	VNETEMDIAK	N2GlcNAc	2	N2H8F0S0	2	N,5;	5	160	2	-0.589856	55.15	21.64	1427.07	C111H187N14O69S1	1	75.39	18_adg_human_15ug_TR2_240615_f	YI3,YI3,	1427.07	2852.13	1427.07	1	7.14	01Y41Y41M(31M21M)61M(31M21M)61M21M	373.36	26	127.78
Q9Y3Q0_NFSEAASDFHK_1_HexNAc(2)Hex(8)	20390	Q9Y3Q0	NFSEAASDFHK	N1GlcNAc	3	N2H8F0S0	2	N,5;	5	628	1	2.01079	41.83	21.11	986.055	C119H184N17O69	1	104.4	12_Tetis_human_8ug_TR3_231109_f	ZI3,YI3,	986.055	2955.14	986.053	1	4.76	01Y41Y41M(31M21M)61M(31M21M)61M21M	373.3	26	115
P42785_NISSHTNIVFSNGELDPWSGGGVTK_1_HexNAc(2)Hex(8)	31215	P42785	NISSHTNIVFSNGELDPWSGGGVTK	N1GlcNAc	3	N2H8F0S0	0	N,11;	11	415	1	2.29798	41.12	22.44	1441.3	C178H281N34O89	1	149.8	18_adg_human_15ug_TR3_240615_f		1440.96	4318.85	1440.96	1	3.99	01Y41Y41M(31M21M21M31G)61M(31M)61M	373.19	39	81.25
Q9UHG3_LLHALGGDDFLGMLNR_15_HexNAc(2)Hex(5)	36223	Q9UHG3	LLHALGGDDFLGMLNR	N15GlcNAc	3	N2H5F0S0	11	N,13;	13	196	15	3.48651	46.32	16.98	987.119	C123H201N24O57S1	1	176.11	10_Fat_human_15ug_TR1_231011_f	BI1,BII1,BIII1,BI2,35AI2,YI2,02XI1,ZI1,YI1,BI4,YI2,YI3,YI1,	987.119	2958.33	987.116	1	0	01Y41Y41M(31M)61M(31M)61M	373.03	33	106.67
P48745_NCTSLHTYKPR_1_HexNAc(2)Hex(8)	11009	P48745	NCTSLHTYKPR	N1GlcNAcC2Cam	3	N2H8F0S0	1	N,2;	2	280	1	0.0239601	43.83	25.42	1027.43	C122H200N21O68S1	1	51.57	18_adg_human_15ug_TR1_240615_f	02AI2,	1027.42	3079.26	1027.42	1	19.43	01Y41Y41M(31M21M21M31G)61M(31M)61M	372.84	19	75
P16444_RNWTEAEVK_2_HexNAc(2)Hex(6)	26245	P16444	RNWTEAEVK	N2GlcNAc	2	N2H6F0S0	3	N,2;	2	332	2	2.67924	47.45	12.87	1256.53	C101H164N17O56	1	126.85	16_Pancreas_human_15ug_TR3_240614_f	BI2,YI3,YI3,	1256.53	2511.05	1256.53	2	0	01Y41Y41M(31M21M)61M(31M)61M	372.68	9	37.5
P27987_RLNSSSGSGSGSSGSSVSSPSWAGR_3_HexNAc(2)Hex(9)	23755	P27987	RLNSSSGSGSGSSGSSVSSPSWAGR	N3GlcNAc	3	N2H9F0S0	0	N,1;	1	83	3	-0.147933	31.14	15.83	1402.91	C162H266N35O94	1	114.79	02_RE_Liver_human_15ug_TR3_240613_f		1403.24	4205.71	1403.24	1	8.93	01Y41Y41M(31M21M21M31G31G)61M(31M)61M	372.59	8	14.58
P55268_NTSAASTAQLVEATEELRR_1_HexNAc(5)Hex(4)Fuc(1)	28851	P55268	NTSAASTAQLVEATEELRR	N1GlcNAc	3	N5H4F1S0	0	N,2;	2	1249	1	3.13176	45.8	17.79	1286.91	C153H259N32O82	1	140.61	10_Fat_human_15ug_TR1_231011_f		1286.91	3856.71	1286.91	1	26.81	01Y(61F)41Y41M(31M41Y41L31Y)61M61Y	372.49	19	47.22
P24821_GPNCSEPECPGNCHLR_3_HexNAc(2)Hex(5)	12547	P24821	GPNCSEPECPGNCHLR	N3GlcNAcC4CamC9CamC13Cam	3	N2H5F0S0	15	N,3;	3	184	3	-0.0712747	44.57	23.09	1034.74	C119H191N28O62S3	1	62.43	15_bigintes_human_15ug_TR3_240616_f	BI1,BII1,BIII1,BI2,25AI2,YI1,YI2,YI3,YI4,YII4,YIII3,02XI1,YI1,ZI2,YI2,YI3,YI4,YII4,YIII3,ZI1,YI1,	1034.4	3100.18	1034.4	1	0	01Y41Y41M(31M)61M(31M)61M	372.25	22	66.67
P78504_RDGNSSLIAAVAEVR_4_HexNAc(2)Hex(7)	25053	P78504	RDGNSSLIAAVAEVR	N4GlcNAc	3	N2H7F0S0	4	N,1;	1	1045	4	8.48264	40.83	21.65	1033.8	C122H209N24O68	1	121.38	02_RE_Liver_human_15ug_TR2_240613_f	ZI3,YI3,ZI3,YI3,	1033.8	3098.36	1033.79	2	20.36	01Y41Y41M(31M)61M(31M21M)61M21M	372.23	8	21.43
P10619_MDPPCTNTTAASTYLNNPYVR_7_HexNAc(2)Hex(5)	26887	P10619	MDPPCTNTTAASTYLNNPYVR	C5CamN7GlcNAc	3	N2H5F0S0	8	N,14;	14	333	7	0.414165	30.24	16.81	1202.17	C147H233N30O70S2	1	128.65	18_adg_human_15ug_TR3_240615_f	BI1,BII1,BIII1,BI2,BI2,01AI3,ZI1,YI1,YI2,YI3,	1202.18	3602.5	1202.17	1	0	01Y41Y41M(31M)61M(31M)61M	371.99	35	87.5
O15021_SFSCLNR_6_HexNAc(4)Hex(3)Fuc(1)	12041	O15021	SFSCLNR	C4CamN6GlcNAc	2	N4H3F1S0	0	N,1;	1	1288	6	-0.708839	51.54	20.71	1164.98	C92H151N16O51S1	1	56.24	04_Stomach_human_15ug_TR2_240614_f		1164.98	2327.94	1164.98	1	7.89	01Y41Y41M(31M41Y31F)61M61Y	371.89	7	33.33
Q96Q89_FSAIAQKVCVPDTLNSSQEK_15_HexNAc(2)Hex(6)	16395	Q96Q89	FSAIAQKVCVPDTLNSSQEK	C9CamN15GlcNAc	3	N2H6F0S0	4	N,0;	0	486	15	-5.40399	29.6	12.56	1201.2	C147H243N28O73S1	1	78.05	16_Pancreas_human_15ug_TR2_240614_f	BI2,BI2,YI3,YI3,	1201.2	3600.59	1201.2	1	6.7	01Y41Y41M(31M21M)61M(31M)61M	371.64	6	15.79
Q9BVK6_FTFTSHTPGEHQICLHSNSTK_18_HexNAc(2)Hex(7)	20746	Q9BVK6	FTFTSHTPGEHQICLHSNSTK	C14CamN18GlcNAc	5	N2H7F0S0	3	N,7;	7	125	18	0.254373	47.94	19.43	795.139	C163H254N33O79S1	2	98.83	18_adg_human_15ug_TR3_240615_f	BI3,YI3,YI3,	795.139	3969.66	795.139	1	4.32	01Y41Y41M(31M)61M(31M21M)61M21M	371.18	25	62.5
P14625_TDDEVVQREEEAIQLDGLNASQIR_19_HexNAc(2)Hex(6)	30077	P14625	TDDEVVQREEEAIQLDGLNASQIR	N19GlcNAc	3	N2H6F0S0	5	N,7;	7	62	19	2.34717	35.7	17.72	1370.28	C164H273N36O85	2	144.11	18_adg_human_15ug_TR1_240615_f	BI2,15AI2,BI2,YI3,YI3,	1370.28	4106.81	1370.28	1	0	01Y41Y41M(31M21M)61M(31M)61M	370.96	28	60.87
P56199_SQNDKFNVSLTVK_7_HexNAc(3)Hex(6)	23534	P56199	SQNDKFNVSLTVK	N7GlcNAc	3	N3H6F0S0	18	N,24;	24	840	7	1.76514	43.86	22.35	1021.45	C124H206N21O67	1	110.68	17_Prostate_human_15ug_TR3_240619_f	03AI2,03AIII2,BI1,BII1,BIII1,BI2,BIII2,CIII2,BIII3,02XI1,ZI1,YI1,YI2,ZIII3,YIII3,YI3,24XIII4,YIII4,02XI1,ZI1,YI1,	1021.45	3061.34	1021.45	1	0	01Y41Y41M(31M41Y41L)61M(31M)61M	370.95	30	116.67
Q08380_GLNLTEDTYKPR_3_HexNAc(2)Hex(8)	20018	Q08380	GLNLTEDTYKPR	N3GlcNAc	3	N2H8F0S0	0	N,2;	2	398	3	0.825467	48.42	19.1	1037.44	C125H206N19O71	1	95.37	18_adg_human_15ug_TR1_240615_f		1037.44	3109.31	1037.44	2	6.92	01Y41Y41M(31M21M21M)61M(31M21M)61M	370.87	22	86.36
P43652_YAEDKFNETTEK_7_HexNAc(4)Hex(5)NeuAc(2)	15299	P43652	YAEDKFNETTEK	N7GlcNAc	3	N4H5F0S2	0	N,12;	12	402	7	0.489478	39.53	24.1	1227.82	C148H232N21O86	1	70.81	21_Bladder_human_15ug_TR3_240619_f		1227.49	3679.44	1227.49	2	46.86	01Y41Y41M(31M)61M(21Y41L32S)61Y41L32S	370.63	24	95.45
P09172_ALYSFAPISMHCNK_13_HexNAc(2)Hex(7)	27225	P09172	ALYSFAPISMHCNK	C12CamN13GlcNAc	3	N2H7F0S0	4	N,9;	9	566	13	1.05851	37.57	17.24	1061.11	C131H208N21O65S2	2	130.29	18_adg_human_15ug_TR3_240615_f	BI2,BIII3,15AI2,15AIII3,BI2,BIII3,YI3,YIII3,	1060.78	3179.31	1060.77	2	0	01Y41Y41M(31M21M21M)61M(31M)61M	369.91	28	100
P07585_IADTNITSIPQGLPPSLTELHLDGNK_5_HexNAc(3)Hex(6)	34179	P07585	IADTNITSIPQGLPPSLTELHLDGNK	N5GlcNAc	3	N3H6F0S0	18	N,5;	5	211	5	2.46684	33.48	20.93	1443.34	C180H298N35O86	1	162.42	17_Prostate_human_15ug_TR3_240619_f	03AI2,03AIII2,01AI1,01AII1,01AIII1,BI1,BII1,BIII1,BI2,BIII2,CIII2,02AIII3,BIII3,CIII3,YI2,BI4,02XI1,ZI1,YI1,YI2,YIII3,YIII4,YI1,	1443.34	4326	1443.34	1	0	01Y41Y41M(31M41Y41L)61M(31M)61M	369.68	36	70
Q16787_LNDTVGVTK_2_HexNAc(2)Hex(5)	13184	Q16787	LNDTVGVTK	N2GlcNAc	2	N2H5F0S0	17	N,6;	6	2751	2	0.0719198	61.84	18.18	1082.48	C86H148N13O50	1	70.12	human_lung_14ug_TR3_0626_f	BI1,BII1,BIII1,CI1,CII1,CIII1,BI2,02XI1,YI1,02XI2,ZI2,YI2,ZI3,YI3,YI4,YII4,YIII3,BI4,02XI1,ZI1,YI1,YI2,YI3,	1082.48	2162.94	1082.48	1	0	01Y41Y41M(31M)61M(31M)61M	369.61	25	137.5
Q02487_NGIYNITVLASDQGGR_5_HexNAc(2)Hex(6)	29365	Q02487	NGIYNITVLASDQGGR	N5GlcNAc	3	N2H6F0S0	3	N,12;	12	546	5	-0.432529	46.86	18.88	1019.78	C123H203N24O65	1	138.11	20_Oesophagus_human_15ug_TR3_240618_f	BI2,BI2,YI3,	1019.78	3056.33	1019.78	2	0	01Y41Y41M(31M21M)61M(31M)61M	369.11	32	96.67
Q9UKK3_VGRVNETTEFLSK_5_HexNAc(2)Hex(5)	23742	Q9UKK3	VGRVNETTEFLSK	N5GlcNAc	3	N2H5F0S0	20	N,3;	3	421	5	-0.386361	46.91	15.97	899.742	C110H183N20O57	1	111.68	17_Prostate_human_15ug_TR3_240619_f	BI1,BII1,BIII1,BI2,BI2,YI1,YI2,YI3,14XI1,02XI1,25XI1,ZI1,YI1,02XI2,YI2,ZI3,YI3,YI4,YII4,YIII3,02XI1,ZI1,YI1,YI2,	899.74	2696.2	899.741	1	0	01Y41Y41M(31M)61M(31M)61M	369.01	10	29.17
P14415_KFHVNYTQPLVAVK_5_HexNAc(2)Hex(8)	21955	P14415	KFHVNYTQPLVAVK	N5GlcNAc	4	N2H8F0S0	1	N,4;	4	238	5	-1.60903	44.93	23.16	837.882	C142H229N22O69	1	110.22	human_brain_14ug_TR2_0703_f	12AIII4,	837.632	3346.51	837.634	1	9.69	01Y41Y41M(31M21M21M31G)61M(31M)61M	368.79	24	88.46
P11117_KNLTLMATTSQLPK_2_HexNAc(2)Hex(8)	22311	P11117	KNLTLMATTSQLPK	N2GlcNAc	3	N2H8F0S0	0	N,7;	7	267	2	0.0624598	51.08	20.37	1083.82	C131H227N20O71S1	2	106.5	18_adg_human_15ug_TR1_240615_f		1083.82	3248.45	1083.82	2	0	01Y41Y41M(31M21M21M31G)61M(31M)61M	368.49	29	103.85
P02751_DQCIVDDITYNVNDTFHK_13_HexNAc(4)Hex(4)Fuc(1)	29679	P02751	DQCIVDDITYNVNDTFHK	C3CamN13GlcNAc	3	N4H4F1S0	0	N,8;	8	528	13	0.603223	26.11	19.54	1268.86	C156H244N29O78S1	1	138.08	15_bigintes_human_15ug_TR1_240616_f		1269.2	3803.57	1269.2	2	3.52	01Y41Y41M(31M41Y41L)61M61Y31F	368.23	31	88.24
Q9Y4L1_VINETWAWK_3_HexNAc(2)Hex(6)	27541	Q9Y4L1	VINETWAWK	N3GlcNAc	2	N2H6F0S0	3	N,6;	6	862	3	2.10585	52.39	16.5	1263.54	C107H166N15O54	1	140.04	12_Tetis_human_8ug_TR1_231109_f	BI2,YI3,YI3,	1263.54	2525.07	1263.54	2	0	01Y41Y41M(31M21M)61M(31M)61M	367.68	24	131.25
Q9Y2K3_AAFLMGINSSELVK_8_HexNAc(2)Hex(5)	23253	Q9Y2K3	AAFLMGINSSELVK	N8GlcNAc	3	N2H5F0S0	17	N,2;	2	403	8	-2.24972	45.43	15.1	899.742	C112H187N18O55S1	1	108.88	17_Prostate_human_15ug_TR1_240619_f	BI1,BII1,BIII1,BI2,YI1,YI2,YI3,02XI1,ZI1,YI1,02XI2,YI2,ZI3,YI3,YI4,YII4,YIII3,02XI1,ZI1,YI1,YI2,	899.741	2696.21	899.743	1	0	01Y41Y41M(31M)61M(31M)61M	367.64	10	30.77
P07585_LGLSFNSISAVDNGSLANTPHLR_13_HexNAc(4)Hex(6)NeuAc(1)	33882	P07585	LGLSFNSISAVDNGSLANTPHLR	N13GlcNAc	4	N4H6F0S1	3	N,4;	4	262	13	7.75033	38.19	19.44	1116.26	C182H297N36O92	1	159.61	17_Prostate_human_15ug_TR1_240619_f	35AIII4,35AIII4,BIII4,	1116.01	4458.97	1116	1	13.03	01Y41Y41M(31M41Y41L32S)(41Y)61M(31M)61M	367.58	30	65.91
Q07954_LYWISSGNHTINR_12_HexNAc(2)Hex(5)	24576	Q07954	LYWISSGNHTINR	N12GlcNAc	3	N2H5F0S0	17	N,1;	1	1767	12	0.745823	38.26	16.36	926.745	C116H182N23O55	1	117.25	19_Ovarian_human_15ug_TR3_240617_f	BI1,BII1,BIII1,BI2,45AI2,01AI2,03AI2,CI2,YI1,YI2,02XI1,ZI1,YI1,ZI2,YI2,YI3,YI4,YII4,YIII3,ZI1,YI1,	926.745	2777.22	926.744	1	0	01Y41Y41M(31M)61M(31M)61M	367.18	23	87.5
Q07954_LYWISSGNHTINR_8_HexNAc(2)Hex(9)	23880	Q07954	LYWISSGNHTINR	N8GlcNAc	3	N2H9F0S0	1	N,1;	1	1763	8	0.0546075	52.63	25.25	1142.81	C140H222N23O75	2	115.52	02_RE_Liver_human_15ug_TR2_240613_f	45AI3,	1142.81	3425.43	1142.81	1	9.57	01Y41Y41M(31M21M21M31G)61M(31M21M)61M	367.1	24	91.67
Q6ZP82_VSNKTSDSFLNYPSDK_3_HexNAc(4)Hex(4)	15949	Q6ZP82	VSNKTSDSFLNYPSDK	N3GlcNAc	3	N4H4F0S0	0	N,2;	2	966	3	5.14164	51	21.27	1088.47	C134H213N24O69	1	79.19	10_Fat_human_15ug_TR3_231011_f		1088.47	3262.39	1088.47	1	28.12	01Y41Y41M(31M41Y41L)61M61Y	366.72	7	20
P01877_TPLTANITK_6_HexNAc(5)Hex(5)Fuc(1)NeuAc(1)	14912	P01877	TPLTANITK	N6GlcNAc	3	N5H5F1S1	0	N,10;	10	205	6	0.914054	55.64	21.84	1074.8	C129H218N17O76	1	73.61	15_bigintes_human_15ug_TR3_240616_f		1074.8	3221.37	1074.8	2	2.3	01Y41Y41M(31M41Y)61M61Y(31F)41L31Y41L32S	366.72	23	125
Q15223_NPNGTVTVISR_3_HexNAc(4)Hex(5)	15001	Q15223	NPNGTVTVISR	N3GlcNAc	2	N4H5F0S0	0	N,2;	2	202	3	2.34286	52.68	22.14	1391.61	C110H187N20O62	1	76.55	human_brain_14ug_TR3_0703_f		1391.11	2780.21	1391.11	1	22.88	01Y41Y41M(31M41Y41L)61M61Y41L	366.45	18	75
P16444_ANLSQVADHLDHIK_2_HexNAc(3)Hex(5)	26600	P16444	ANLSQVADHLDHIK	N2GlcNAc	4	N3H5F0S0	4	N,8;	8	279	2	1.53716	38.98	15.92	746.086	C121H199N24O62	1	135.45	12_Tetis_human_8ug_TR2_231109_f	BIII1,CIII1,25AIII2,02AIII2,	746.087	2980.32	746.085	2	2.8	01Y41Y41M(31M41Y)61M(31M)61M	366.4	29	103.85
Q4G148_KFNSTQIAAMAPEHEEPR_3_HexNAc(2)Hex(9)	22882	Q4G148	KFNSTQIAAMAPEHEEPR	N3GlcNAc	4	N2H9F0S0	2	N,7;	7	237	3	0.513143	42.59	20.83	981.165	C158H255N28O84S1	1	117.18	12_Tetis_human_8ug_TR2_231109_f	03AI4,35AI4,	981.414	3920.63	981.414	1	8.95	01Y41Y41M(31M21M21M)61M(31M21M)61M21M	366.37	28	79.41
P02751_RHEEGHMLNCTCFGQGR_9_HexNAc(4)Hex(5)Fuc(1)	16153	P02751	RHEEGHMLNCTCFGQGR	N9GlcNAcC10CamC12Cam	4	N4H5F1S0	0	N,0;	0	542	9	0.0460915	27.97	27.77	965.64	C151H242N35O76S3	1	74.77	15_bigintes_human_15ug_TR1_240616_f		965.64	3857.53	965.64	1	10	01Y41Y41M(31M41Y(31F)41L)61M61Y41L	366.31	17	53.13
Q96Q89_FSAIAQKVCVPDTLNSSQEK_15_HexNAc(2)Hex(7)	16332	Q96Q89	FSAIAQKVCVPDTLNSSQEK	C9CamN15GlcNAc	3	N2H7F0S0	5	N,1;	1	486	15	-4.30807	33.56	14.39	1255.22	C153H253N28O78S1	1	76.77	04_Stomach_human_15ug_TR3_240614_f	04AI3,BI2,BI2,YI3,YI3,	1255.55	3762.64	1255.55	1	9.95	01Y41Y41M(31M21M)61M(31M21M)61M	366.28	7	15.79
Q16853_YLYLASNHSNK_7_HexNAc(4)Hex(4)Fuc(1)	15421	Q16853	YLYLASNHSNK	N7GlcNAc	3	N4H4F1S0	0	N,8;	8	592	7	-0.0116013	41.71	20.14	973.086	C121H191N20O62	1	71.47	15_bigintes_human_15ug_TR1_240616_f		973.086	2916.24	973.086	2	3.03	01Y41Y41M(31M41Y(31F)41L)61M61Y	366.09	24	105
P01877_TPLTANITK_6_HexNAc(4)Hex(5)Fuc(1)NeuAc(1)	15819	P01877	TPLTANITK	N6GlcNAc	2	N4H5F1S1	0	N,10;	10	205	6	-0.144325	31.72	16.9	1510.15	C121H205N16O71	1	73.26	15_bigintes_human_15ug_TR1_240616_f		1510.15	3018.29	1510.15	1	11.43	01Y(61F)41Y41M(31M41Y41L)61M61Y41L32S	365.41	25	137.5
P09172_ALYSFAPISMHCNK_13_HexNAc(2)Hex(6)	27288	P09172	ALYSFAPISMHCNK	C12CamN13GlcNAc	3	N2H6F0S0	4	N,9;	9	566	13	-0.18382	21.61	12.46	1007.76	C125H198N21O60S2	1	130.59	18_adg_human_15ug_TR3_240615_f	BI2,45AI3,03AI3,YI3,	1006.76	3017.25	1006.76	1	1.94	01Y41Y41M(31M)61M(31M21M)61M	365.29	27	100
O14773_FLSSSPHLPPSSYFNASGR_15_HexNAc(2)Hex(4)	26277	O14773	FLSSSPHLPPSSYFNASGR	N15GlcNAc	3	N2H4F0S0	19	N,8;	8	443	15	-0.381189	41.53	14.41	1036.13	C133H202N27O58	1	125.71	18_adg_human_15ug_TR1_240615_f	01AII2,BI1,BII1,BII2,15AII2,BII2,BI2,CII2,YI1,YI2,BI3,02XI1,34XI1,ZI1,YI1,ZI2,YI2,YII3,YI3,YII4,YI1,	1036.13	3105.37	1036.13	1	0	01Y41Y41M(31M21M)61M	364.71	24	63.89
P10321_GYYNQSEDGSHTLQR_4_HexNAc(2)Hex(8)	14286	P10321	GYYNQSEDGSHTLQR	N4GlcNAc	3	N2H8F0S0	0	N,2;	2	110	4	-0.732485	45.18	23.69	1153.46	C137H214N25O78	1	67.59	18_adg_human_15ug_TR1_240615_f		1153.46	3457.35	1153.46	2	9.55	01Y41Y41M(31M21M21M)61M(31M21M)61M	364.09	25	82.14
Q8TCJ2_TTLVDNNTWNNSHIALVGK_6_HexNAc(2)Hex(9)	25102	Q8TCJ2	TTLVDNNTWNNSHIALVGK	N6GlcNAc	3	N2H9F0S0	0	N,1;	1	623	6	0.783254	38.77	17.97	1321.91	C161H262N29O85	1	120.87	15_bigintes_human_15ug_TR3_240616_f		1321.91	3961.71	1321.91	1	10.79	01Y41Y41M(31M21M21M)61M(31M21M)61M21M	363.89	30	77.78
Q15293_VVRPDSELGERPPEDNQSFQYDHEAFLGKEDSK_16_HexNAc(2)Hex(7)	23677	Q15293	VVRPDSELGERPPEDNQSFQYDHEAFLGKEDSK	N16GlcNAc	5	N2H7F0S0	4	N,0;	0	53	16	0.169599	43.15	16.78	1073.07	C223H345N48O104	1	113.08	18_adg_human_15ug_TR1_240615_f	BI2,BI2,YI3,YI3,	1073.07	5359.32	1073.07	1	7.39	01Y41Y41M(31M21M)61M(31M21M)61M	363.69	16	25
P07998_SNSSMHITDCR_2_HexNAc(2)Hex(9)	13911	P07998	SNSSMHITDCR	N2GlcNAcC10Cam	3	N2H9F0S0	1	N,6;	6	104	2	2.2446	67.06	32.8	1058.4	C119H199N20O75S2	2	72.37	12_Tetis_human_8ug_TR1_231109_f	04AI4,	1058.4	3172.18	1058.4	1	5.13	01Y41Y41M(31M21M21M)61M(31M21M)61M21M	363.59	24	105
P16671_VFNGKDNISK_7_HexNAc(2)Hex(8)	14232	P16671	VFNGKDNISK	N7GlcNAc	3	N2H8F0S0	2	N,9;	9	220	7	0.737323	56.18	24.54	942.736	C113H187N16O66	1	71.55	10_Fat_human_15ug_TR3_231011_f	ZI3,YI3,	942.399	2824.18	942.398	1	4.86	01Y41Y41M(31M21M)61M(31M21M)61M21M	363.58	23	105.56
Q9UF11_TALLEANSTPAPAGATVPPR_7_HexNAc(5)Hex(5)NeuAc(1)	35683	Q9UF11	TALLEANSTPAPAGATVPPR	N7GlcNAc	4	N5H5F0S1	0	N,1;	1	127	7	1.34608	58.34	18.43	1013.71	C165H273N30O86	1	176.86	11_Spleen_human_15ug_TR3_231108_f_24580-		1013.96	4050.79	1013.95	1	19.98	01Y41Y41M(31M41Y)61M61Y41L31Y41L32S	363.48	8	15.79
Q07954_MHLNGSNVQVLHR_4_HexNAc(2)Hex(9)	18460	Q07954	MHLNGSNVQVLHR	N4GlcNAc	3	N2H9F0S0	0	N,2;	2	3089	4	-1.00834	48.76	28.82	1124.14	C133H222N25O73S1	1	88.48	02_RE_Liver_human_15ug_TR1_240613_f		1124.14	3369.41	1124.14	1	10.67	01Y41Y41M(31M21M21M31G)61M(31M21M)61M	363.42	19	70.83
P12821_NETHFDAGAK_1_HexNAc(2)Hex(8)	10338	P12821	NETHFDAGAK	N1GlcNAc	3	N2H8F0S0	0	N,8;	8	509	1	1.42128	55.11	34.65	931.7	C110H175N16O67	1	55.58	human_lung_14ug_TR2_0625_f		931.7	2792.08	931.699	2	15.38	01Y41Y41M(31M21M21M)61M(31M21M)61M	363.35	27	133.33
P02679_VDKDLQSLEDILHQVENK_17_HexNAc(4)Hex(5)Fuc(2)NeuAc(1)	36313	P02679	VDKDLQSLEDILHQVENK	N17GlcNAc	4	N4H5F2S1	2	N,10;	10	78	17	-3.44228	40.48	25.72	1083.23	C176H291N30O94	1	174.93	19_Ovarian_human_15ug_TR3_240617_f	YII3,YII3,	1083.48	4328.89	1083.48	2	2.57	01Y41Y41M(31M(21Y(31F)41L32S)41Y31F)61M61M	363.3	34	94.12
P01877_HYTNSSQDVTVPCR_4_HexNAc(5)Hex(4)	14812	P01877	HYTNSSQDVTVPCR	N4GlcNAcC13Cam	3	N5H4F0S0	0	N,5;	5	92	4	10.6691	45.87	23.52	1110.47	C132H212N27O70S1	1	68.62	21_Bladder_human_15ug_TR2_240619_f		1110.14	3327.36	1110.13	1	18.97	01Y41Y41M(31M41Y41L31Y)61M61Y	363.25	24	84.62
Q8NI77_GTRFVEGTNINR_11_HexNAc(2)Hex(7)	18918	Q8NI77	GTRFVEGTNINR	N11GlcNAc	3	N2H7F0S0	5	N,1;	1	282	11	2.20535	48.42	22.82	969.087	C115H191N22O64	1	87.89	17_Prostate_human_15ug_TR2_240619_f	45AI3,35AI3,YI3,ZI3,YI3,	969.087	2904.24	969.085	1	7.62	01Y41Y41M(31M)61M(31M21M)61M21M	362.96	6	18.18
P04004_NISDGFDGIPDNVDAALALPAHSYSGR_1_HexNAc(4)Hex(5)NeuAc(2)	36410	P04004	NISDGFDGIPDNVDAALALPAHSYSGR	N1GlcNAc	4	N4H5F0S2	0	N,4;	4	242	1	1.63148	45.04	22.12	1245.53	C204H319N40O103	1	173.06	17_Prostate_human_15ug_TR2_240619_f		1245.53	4977.1	1245.53	1	11.02	01Y41Y41M(31M)61M(21Y41L32S)61Y41L32S	362.85	34	63.46
P01008_LGACNDTLQQLMEVFK_5_HexNAc(4)Hex(5)NeuAc(2)	41843	P01008	LGACNDTLQQLMEVFK	C4CamN5GlcNAc	3	N4H5F0S2	0	N,3;	3	128	5	2.53271	43.46	24.22	1358.57	C164H268N27O87S2	1	200.79	21_Bladder_human_15ug_TR3_240619_f		1358.57	4071.68	1358.57	1	9.38	01Y41Y41M(31M)61M(21Y41L32S)61Y41L32S	362.64	29	86.67
P11279_SSCGKENTSDPSLVIAFGR_7_HexNAc(2)Hex(3)Fuc(1)	26467	P11279	SSCGKENTSDPSLVIAFGR	C3CamN7GlcNAc	3	N2H3F1S0	10	N,6;	6	84	7	1.21577	28.98	17.54	1022.46	C124H204N27O60S1	1	126.61	18_adg_human_15ug_TR1_240615_f	03AI2,BI1,BII1,BI2,BI3,YI2,02XI1,ZI1,YI1,YI2,YI3,YII3,	1022.12	3063.35	1022.12	1	0	01Y(61F)41Y41M(31M)61M	362.36	30	80.56
P01876_LSLHRPALEDLLLGSEANLTCTLTGLR_18_HexNAc(3)Hex(4)NeuAc(1)	43574	P01876	LSLHRPALEDLLLGSEANLTCTLTGLR	N18GlcNAcC21Cam	4	N3H4F0S1	13	N,2;	2	144	18	3.92135	48.5	19.9	1129.55	C187H316N41O84S1	1	210.1	21_Bladder_human_15ug_TR2_240619_f	02AI2,BI2,BI1,35AI4,01AI2,BI2,CI2,35AI3,BI3,35AI4,35AI5,YI5,YI6,	1129.3	4512.14	1129.29	1	38.2	01Y41Y41M(31M)61M61Y41L32S	362.35	22	42.31
Q96MR6_IMQENVSLIKEINELR_5_HexNAc(2)Hex(6)	24343	Q96MR6	IMQENVSLIKEINELR	N5GlcNAc	3	N2H6F0S0	4	N,1;	1	1137	5	6.75144	40.89	14.68	1103.86	C135H232N25O67S1	1	112.92	15_bigintes_human_15ug_TR1_240616_f	BI2,BI2,YI3,YI3,	1103.52	3307.52	1103.51	1	7.38	01Y41Y41M(31M21M)61M(31M)61M	362.34	8	23.33
P35916_NISLELVVNVPPQIHEK_1_HexNAc(2)Hex(6)	23793	P35916	NISLELVVNVPPQIHEK	N1GlcNAc	3	N2H6F0S0	4	N,1;	1	411	1	-3.22847	40.76	12.65	1103.85	C139H232N25O66	1	114.87	15_bigintes_human_15ug_TR3_240616_f	BI2,BI2,YI3,YI3,	1103.52	3307.56	1103.52	1	2.39	01Y41Y41M(31M21M)61M(31M)61M	362.05	8	18.75
P11215_KAPVVNCSIAVCQR_6_HexNAc(2)Hex(9)	19097	P11215	KAPVVNCSIAVCQR	N6GlcNAcC7CamC12Cam	3	N2H9F0S0	0	N,6;	6	1021	6	2.99937	42.08	17.89	1157.17	C136H233N24O75S2	1	96.03	11_Spleen_human_15ug_TR3_231108_f		1156.5	3466.46	1156.49	1	2.17	01Y41Y41M(31M21M21M31G)61M(31M21M)61M	361.89	24	84.62
P05556_KDTCTQECSYFNITK_12_HexNAc(4)Hex(5)Fuc(1)	20814	P05556	KDTCTQECSYFNITK	C4CamC8CamN12GlcNAc	3	N4H5F1S0	0	N,5;	5	669	12	-1.28633	37.51	26.96	1222.16	C147H236N25O78S2	1	96.39	15_bigintes_human_15ug_TR1_240616_f		1222.5	3663.47	1222.5	2	2.53	01Y41Y41M(31M41Y(31F)41L)61M61Y41L	361.39	27	89.29
P49019_ITGEPDNNRSTSVELTGDPNK_20_HexNAc(2)Hex(5)	16584	P49019	ITGEPDNNRSTSVELTGDPNK	N20GlcNAc	3	N2H5F0S0	20	N,1;	1	336	20	-1.89459	36.31	12.29	1154.84	C137H227N30O73	1	78.95	16_Pancreas_human_15ug_TR2_240614_f	BI1,BII1,BIII1,BI2,BI2,25AI3,ZI2,YI2,ZI3,YI3,BI4,YI4,YII4,YIII3,MH,02XI1,ZI1,YI1,24XI2,ZI2,YI2,YI3,YI4,YII4,YIII3,YI1,	1154.5	3460.5	1154.51	1	0	01Y41Y41M(31M)61M(31M)61M	361.06	7	15
Q9Y6J6_QNTTAEQEALQAK_2_HexNAc(2)Hex(8)	17619	Q9Y6J6	QNTTAEQEALQAK	N2GlcNAc	3	N2H8F0S0	3	N,1;	1	29	2	5.02411	44.45	16.94	1045.77	C122H205N20O74	1	84.43	02_RE_Liver_human_15ug_TR2_240613_f	YI3,ZI3,YI3,	1045.77	3134.29	1045.77	1	14.44	01Y41Y41M(31M21M)61M(31M21M)61M21M	360.61	7	16.67
Q9UKR3_EGGKDSCEGDSGGPLVCNR_18_HexNAc(6)Hex(3)Fuc(2)	13239	Q9UKR3	EGGKDSCEGDSGGPLVCNR	C7CamC17CamN18GlcNAc	3	N6H3F2S0	0	N,9;	9	225	18	0.85832	45.08	28.44	1331.54	C154H253N32O86S2	1	61.8	20_Oesophagus_human_15ug_TR1_240618_f		1331.54	3990.58	1331.54	1	29.32	01Y41Y41M(31M(21Y31F)41Y)61M(21Y31F)61Y	360.5	30	77.78
Q8NDV7_KTDNGTEAWGSSATQTFNSGACIDK_4_HexNAc(2)Hex(5)	21206	Q8NDV7	KTDNGTEAWGSSATQTFNSGACIDK	N4GlcNAcC22Cam	4	N2H5F0S0	18	N,3;	3	748	4	3.83824	28.68	13.85	966.908	C155H245N34O78S1	1	101.83	16_Pancreas_human_15ug_TR3_240614_f	35AI3,BI1,BII1,BIII1,BI2,ZI2,YI2,YI3,14XI1,02XI1,34XI1,ZI1,YI1,ZI2,YI2,YI3,YI4,YII4,YIII3,02XI1,ZI1,YI1,	966.91	3862.6	966.906	1	0	01Y41Y41M(31M)61M(31M)61M	360.48	10	20.83
Q8TCJ2_VMSWWDYGYQIAGMANR_16_HexNAc(2)Hex(9)	38610	Q8TCJ2	VMSWWDYGYQIAGMANR	N16GlcNAc	3	N2H9F0S0	0	N,12;	12	616	16	-0.553687	41.8	18.24	1305.53	C163H247N26O80S2	1	186.75	18_adg_human_15ug_TR2_240615_f		1305.52	3912.55	1305.52	1	1.6	01Y41Y41M(31M21M21M31G)61M(31M21M)61M	360.4	36	106.25
P01903_FTPPVVNVTWLR_7_HexNAc(2)Hex(8)	34781	P01903	FTPPVVNVTWLR	N7GlcNAc	2	N2H8F0S0	0	N,5;	5	143	7	3.43207	47.78	20.79	1566.7	C133H212N19O66	1	172.39	11_Spleen_human_15ug_TR3_231108_f_24580-		1566.7	3131.38	1566.7	1	4.72	01Y41Y41M(31M21M21M)61M(31M21M)61M	360.33	20	77.27
P12110_GTFTDCALANMTEQIR_10_HexNAc(4)Hex(5)	30824	P12110	GTFTDCALANMTEQIR	C6CamN10GlcNAc	3	N4H5F0S0	3	N,4;	4	140	10	2.50837	34.56	22.14	1151.15	C137H225N26O72S2	1	145.49	17_Prostate_human_15ug_TR2_240619_f	BI3,YI3,YI3,	1151.15	3450.42	1151.15	2	8.85	01Y41Y41M(31M)61M(21Y41L)61Y41L	360.13	27	83.33
P12109_NVTAQICIDKK_1_HexNAc(3)Hex(6)NeuAc(1)	17869	P12109	NVTAQICIDKK	N1GlcNAcC7Cam	3	N3H6F0S1	11	N,4;	4	804	1	1.74358	45.88	22.73	1055.12	C125H213N20O71S1	1	82.74	17_Prostate_human_15ug_TR2_240619_f	02AIII2,BIII2,BIII1,CIII1,35AIII4,BIII2,35AIII3,BIII3,35AIII4,YIII5,YIII6,	1055.12	3162.34	1055.12	1	36.01	01Y41Y41M(31M41Y41L32S)61M(31M)61M	360	25	110
P05164_SCPACPGSNITIR_9_HexNAc(2)Hex(3)	19644	P05164	SCPACPGSNITIR	C2CamC5CamN9GlcNAc	2	N2H3F0S0	17	N,6;	6	323	9	4.62458	45.82	12.49	1164	C91H154N21O45S2	1	98.61	11_Spleen_human_15ug_TR3_231108_f	03AI2,BI1,BII1,03AI2,CI2,03AI3,BI3,02XI1,ZI1,YI1,ZI2,YI2,YI3,YII3,MH,02XI1,ZI1,YI1,YI2,	1163.5	2324.98	1163.5	1	0	01Y41Y41M(31M)61M	360	20	75
Q16610_HIPGLIHNMTAR_8_HexNAc(3)Hex(3)	22025	Q16610	HIPGLIHNMTAR	N8GlcNAc	3	N3H3F0S0	10	N,6;	6	444	8	-0.211082	51.64	18.07	819.382	C101H168N23O45S1	1	103.07	20_Oesophagus_human_15ug_TR2_240618_f	BI1,CI1,02AI2,01AI2,BI2,CI2,ZI3,YI3,ZI4,YI4,	819.382	2455.13	819.382	1	50.6	01Y41Y41M(31M)61M61Y	359.86	20	81.82
Q86WI1_AMLTFLNGSR_7_HexNAc(2)Hex(6)	24287	Q86WI1	AMLTFLNGSR	N7GlcNAc	2	N2H6F0S0	4	N,2;	2	3729	7	7.43089	74.35	17.9	1245.04	C100H167N16O54S1	1	124.05	12_Tetis_human_8ug_TR2_231109_f	BI2,ZI3,YI3,YI3,	1245.04	2488.05	1245.03	2	0	01Y41Y41M(31M21M)61M(31M)61M	359.54	8	27.78
O95302_YHYNGTLLDGTLFDSSYSR_4_HexNAc(2)Hex(8)	32142	O95302	YHYNGTLLDGTLFDSSYSR	N4GlcNAc	3	N2H8F0S0	1	N,5;	5	286	4	1.8556	37.11	15.59	1305.55	C163H248N27O83	1	154.53	18_adg_human_15ug_TR2_240615_f	04AI3,	1305.21	3911.6	1305.21	2	4	01Y41Y41M(31M21M21M)61M(31M21M)61M	359.47	32	86.11
Q66GS9_LQLELNLCQKEK_6_HexNAc(2)Hex(6)	23219	Q66GS9	LQLELNLCQKEK	N6GlcNAcC8Cam	3	N2H6F0S0	4	N,1;	1	373	6	3.51979	39.66	14.35	965.775	C117H201N20O61S1	1	117.57	human_brain_14ug_TR1_0703_f_new	BI2,BI2,ZI3,YI3,	965.775	2894.3	965.771	1	9.43	01Y41Y41M(31M21M)61M(31M)61M	359.41	6	18.18
P13473_VQPFNVTQGK_5_HexNAc(4)Hex(5)Fuc(1)	16914	P13473	VQPFNVTQGK	N5GlcNAc	2	N4H5F1S0	0	N,6;	6	356	5	0.846079	36.79	18.95	1444.13	C118H193N18O64	1	80.32	18_adg_human_15ug_TR1_240615_f		1444.13	2886.24	1444.13	1	3.47	01Y41Y41M(31M41Y(31F)41L)61M61Y41L	359.33	21	100
Q16787_RNASGDELVR_2_HexNAc(2)Hex(5)	13659	Q16787	RNASGDELVR	N2GlcNAc	2	N2H5F0S0	21	N,1;	1	2162	2	2.60421	58.96	14.46	1167.51	C90H154N19O52	1	64.27	04_Stomach_human_15ug_TR2_240614_f	BI1,BII1,BIII1,03AI2,CI2,BI2,45AI3,ZI1,YI1,02XI2,ZI2,YI2,ZI3,YI3,BI4,ZI4,ZII4,ZIII3,YI4,YII4,YIII3,MH,02XI1,ZI1,YI1,YI2,YI3,	1167.51	2333	1167.5	1	0	01Y41Y41M(31M)61M(31M)61M	359.12	9	33.33
P11047_TANDTSTEAYNLLLR_3_HexNAc(2)Hex(5)	30833	P11047	TANDTSTEAYNLLLR	N3GlcNAc	2	N2H5F0S0	19	N,3;	3	1205	3	1.78955	42.54	15.22	1450.14	C117H193N22O62	1	148.51	10_Fat_human_15ug_TR2_231011_f	03AI2,BI1,BII1,BIII1,01AI3,24AI4,02AI4,BI2,ZI1,YI1,02XI2,BI4,ZI2,YI2,ZI3,YI3,YI4,YII4,YIII3,02XI1,ZI1,YI1,YI2,	1450.14	2898.26	1450.14	1	0	01Y41Y41M(31M)61M(31M)61M	359.08	26	82.14
Q99715_MLEAYNLTEK_6_HexNAc(2)Hex(5)	22307	Q99715	MLEAYNLTEK	N6GlcNAc	2	N2H5F0S0	18	N,8;	8	2528	6	0.72391	49.2	18.21	1215.02	C99H163N14O53S1	1	106.19	19_Ovarian_human_15ug_TR3_240617_f	03AI2,BI1,BII1,BIII1,24AI4,02AI2,04AI3,02XI1,YI1,ZI2,YI2,YI3,BI4,YI4,YII4,YIII3,14XI1,02XI1,ZI1,YI1,YI2,YI3,	1215.02	2428.02	1215.02	1	0	01Y41Y41M(31M)61M(31M)61M	358.79	26	127.78
Q6Q8B3_ETNETKETNCTVER_9_HexNAc(3)Hex(5)	15011	Q6Q8B3	ETNETKETNCTVER	N9GlcNAcC10Cam	3	N3H5F0S0	0	N,1;	1	92	9	1.93511	41.5	17.67	1044.43	C120H201N24O70S1	1	68.79	17_Prostate_human_15ug_TR2_240619_f		1044.43	3130.26	1044.43	1	22.59	01Y41Y41M(31M)(41Y)61M31M21M	358.4	6	15.38
Q13586_LAVTNTTMTGTVLK_5_HexNAc(2)Hex(8)	22560	Q13586	LAVTNTTMTGTVLK	N5GlcNAc	2	N2H8F0S0	0	N,3;	3	171	5	2.69903	58.72	27.39	1577.2	C126H219N18O71S1	1	108.97	02_RE_Liver_human_15ug_TR2_240613_f		1577.2	3152.38	1577.2	2	7.35	01Y41Y41M(31M21M21M)61M(31M21M)61M	358.3	31	107.69
Q9UQB3_LPGGNNSNNTASK_5_HexNAc(2)Hex(9)	17098	Q9UQB3	LPGGNNSNNTASK	N5GlcNAc	3	N2H9F0S0	0	N,0;	0	945	5	-1.7926	49.62	17.78	1047.09	C120H201N20O76	1	81.76	02_RE_Liver_human_15ug_TR3_240613_f		1047.09	3138.25	1047.09	2	12.39	01Y41Y41M(31M21M21M31G)61M(31M21M)61M	358.17	9	25
P05164_SYNDSVDPR_3_HexNAc(3)Hex(3)Fuc(1)	13979	P05164	SYNDSVDPR	N3GlcNAc	2	N3H3F1S0	8	N,1;	1	483	3	1.15816	58.93	24.41	1147.97	C91H145N16O52	1	72.46	11_Spleen_human_15ug_TR1_231108_f	BI1,CI1,BI2,CI2,YI3,YI4,YI3,YI4,	1147.97	2293.92	1147.96	1	10.92	01Y(61F)41Y41M(31M)61M61Y	357.3	17	87.5
P14625_HNNDTQHIWESDSNEFSVIADPR_3_HexNAc(3)Hex(3)Fuc(1)	28769	P14625	HNNDTQHIWESDSNEFSVIADPR	N3GlcNAc	3	N3H3F1S0	7	N,10;	10	217	3	1.01152	49.06	23.47	1318.9	C163H247N38O76	1	139.62	02_RE_Liver_human_15ug_TR1_240613_f	BI1,CI1,BI2,YI3,YI4,YI3,YI4,	1318.9	3952.66	1318.89	1	5	01Y(61F)41Y41M(31M)61M61Y	357.25	28	63.64
P07585_LGLSFNSISAVDNGSLANTPHLR_13_HexNAc(5)Hex(6)Fuc(1)NeuAc(1)	32218	P07585	LGLSFNSISAVDNGSLANTPHLR	N13GlcNAc	3	N5H6F1S1	0	N,4;	4	262	13	2.22132	44.59	25.6	1604.38	C196H320N37O101	1	150.3	15_bigintes_human_15ug_TR1_240616_f		1604.05	4808.1	1604.04	2	7.11	01Y41Y41M(31M41Y41L)61M61Y(31F)41L31Y41L32S	357.16	31	68.18
P01857_TKPREEQYNSTYR_9_HexNAc(4)Hex(4)	14088	P01857	TKPREEQYNSTYR	N9GlcNAc	3	N4H4F0S0	0	N,0;	0	180	9	2.33442	62.4	23.76	1045.12	C127H203N26O65	1	70.92	10_Fat_human_15ug_TR3_231011_f		1045.12	3132.34	1045.12	1	48.98	01Y41Y41M(31M41Y41L)61M61Y	356.72	10	33.33
Q5TFG8_FNESAAERHTNFCK_11_HexNAc(3)Hex(5)	15062	Q5TFG8	FNESAAERHTNFCK	N11GlcNAcC13Cam	4	N3H5F0S0	0	N,2;	2	138	11	-0.239642	40.26	16.89	783.573	C126H197N26O64S1	1	69.18	21_Bladder_human_15ug_TR1_240619_f		783.573	3130.27	783.573	1	23.5	01Y41Y41M(31M)(41Y)61M31M21M	356.49	6	15.38
P12110_GTFTDCALANMTEQIRQDR_10_HexNAc(2)Hex(5)	29425	P12110	GTFTDCALANMTEQIRQDR	C6CamN10GlcNAc	3	N2H5F0S0	19	N,1;	1	140	10	0.676019	31.8	10.47	1148.82	C136H224N31O68S2	1	136.89	15_bigintes_human_15ug_TR1_240616_f	01AI1,01AII1,01AIII1,BI1,BII1,BIII1,BI2,BI2,YI1,ZI2,YI2,YI3,BI4,15XI1,02XI1,24XI1,ZI1,YI1,ZI2,YI2,ZI3,YI3,YI4,YII4,YIII3,	1148.82	3443.45	1148.82	1	0	01Y41Y41M(31M)61M(31M)61M	356.49	13	36.11
P08648_VTGLNCTTNHPINPK_5_HexNAc(4)Hex(5)Fuc(1)NeuAc(2)	15857	P08648	VTGLNCTTNHPINPK	N5GlcNAcC6Cam	3	N4H5F1S2	2	N,3;	3	868	5	2.67972	33.89	19.36	1339.9	C160H263N28O88S1	1	73.44	15_bigintes_human_15ug_TR1_240616_f	YI3,YI3,	1340.23	4016.67	1340.23	1	1.15	01Y41Y41M(31M)61M(21Y(31F)41L32S)61Y41L32S	356.43	25	82.14
O94806_TGLSARLSNGSFSAPSLTNSR_9_HexNAc(4)Hex(5)NeuAc(1)	36050	O94806	TGLSARLSNGSFSAPSLTNSR	N9GlcNAc	3	N4H5F0S1	2	N,2;	2	42	9	4.88967	51.92	21.14	1346.93	C161H267N34O85	1	179.71	11_Spleen_human_15ug_TR1_231108_f	03AI5,35AI5,	1346.93	4036.76	1346.93	1	9.9	01Y41Y41M(31M41Y41L)61M61Y41L32S	356.33	8	15
Q96LK0_NFSKFSDCTR_1_HexNAc(5)Hex(4)Fuc(1)	18166	Q96LK0	NFSKFSDCTR	N1GlcNAcC8Cam	3	N5H4F1S0	0	N,1;	1	38	1	1.80008	46.17	24.12	1024.75	C123H196N21O67S1	1	94.54	human_intestine_14ug_TR1_0704_f		1024.75	3071.23	1024.75	2	5.27	01Y41Y41M(31M41Y41L31Y)61M61Y31F	356.19	8	27.78
P02786_QNNGAFNETLFR_7_HexNAc(5)Hex(3)	16802	P02786	QNNGAFNETLFR	N7GlcNAc	3	N5H3F0S0	0	N,0;	0	727	7	-0.706341	54.29	20.14	972.083	C119H187N24O60	1	86.88	human_kidney_9ug_TR1_0701_f		971.749	2912.23	971.75	1	25.08	01Y41Y41M(31M41Y)61M(21Y)61Y	356.07	9	22.73
Q07954_INNGGCQDLCLLTHQGHVNCSCR_19_HexNAc(2)Hex(9)	22516	Q07954	INNGGCQDLCLLTHQGHVNCSCR	C6CamC10CamN19GlcNAcC20CamC22Cam	4	N2H9F0S0	0	N,4;	4	2502	19	0.55062	46.33	24.96	1145.71	C176H290N41O92S4	1	108.68	02_RE_Liver_human_15ug_TR1_240613_f		1145.71	4577.82	1145.71	1	13.18	01Y41Y41M(31M21M21M)61M(31M21M)61M21M	356.04	14	31.82
P20645_LKPLFNK_6_HexNAc(2)Hex(6)	17378	P20645	LKPLFNK	N6GlcNAc	3	N2H6F0S0	4	N,3;	3	57	6	0.4616	55.31	20.34	747.011	C94H157N12O49	1	82.37	18_adg_human_15ug_TR2_240615_f	BI2,ZI3,YI3,YI3,	747.012	2238.02	747.011	1	10.19	01Y41Y41M(31M)61M(31M21M)61M	355.97	14	108.33
O76039_SGPNGHPYNR_9_HexNAc(5)Hex(4)Fuc(1)	14934	O76039	SGPNGHPYNR	N9GlcNAc	3	N5H4F1S0	0	N,1;	1	942	9	3.30665	58.43	30.82	970.4	C116H183N22O64	2	77.56	human_kidney_9ug_TR3_0701_f		970.401	2908.17	970.397	1	15.82	01Y41Y41M(31M41Y41L31Y)61M61Y31F	355.48	7	27.78
Q86VB7_WGHSECGHKEDAAVNCTDISVQK_15_HexNAc(4)Hex(5)NeuAc(1)	17143	Q86VB7	WGHSECGHKEDAAVNCTDISVQK	C6CamN15GlcNAcC16Cam	4	N4H5F0S1	3	N,2;	2	1027	15	-0.36776	47.42	24.08	1136.72	C181H286N39O92S2	1	81.37	18_adg_human_15ug_TR1_240615_f	03AI5,03AI5,35AI5,	1136.72	4541.83	1136.72	1	7.42	01Y41Y41M(31M41Y41L)61M61Y41L32S	355.36	21	45.45
P06756_ISSLQTTEKNDTVAGQGER_10_HexNAc(2)Hex(8)	13909	P06756	ISSLQTTEKNDTVAGQGER	N10GlcNAc	3	N2H8F0S0	0	N,4;	4	874	10	-0.673385	48.35	25	1246.87	C146H247N28O84	2	65.74	18_adg_human_15ug_TR1_240615_f		1246.54	3736.59	1246.54	1	4.78	01Y41Y41M(31M21M21M)61M(31M21M)61M	355.32	25	66.67
P20645_LKPLFNK_6_HexNAc(2)Hex(8)	19780	P20645	LKPLFNK	N6GlcNAc	3	N2H8F0S0	3	N,4;	4	57	6	1.5352	52.69	18.13	855.049	C106H177N12O59	1	101.41	12_Tetis_human_8ug_TR3_231109_f	ZI3,YI3,YI3,	855.048	2562.12	855.047	1	9.93	01Y41Y41M(31M21M)61M(31M21M)61M21M	355.13	15	116.67
Q9UHL4_ALAGLVYNASGSEHCYDIYR_8_HexNAc(2)Hex(5)	27917	Q9UHL4	ALAGLVYNASGSEHCYDIYR	N8GlcNAcC15Cam	3	N2H5F0S0	13	N,2;	2	315	8	2.05237	38.33	15.94	1159.84	C145H224N29O67S1	1	133.61	18_adg_human_15ug_TR1_240615_f	BI1,BII1,BIII1,BI2,BI2,YI1,YI3,BI4,02XI1,ZI1,YI1,YI2,YI3,YI4,YII4,YIII3,YI1,	1159.5	3475.47	1159.5	1	0	01Y41Y41M(31M)61M(31M)61M	355	25	63.16
Q08828_GEMLTYFLEGRTDGNGSQIR_15_HexNAc(2)Hex(5)	16606	Q08828	GEMLTYFLEGRTDGNGSQIR	N15GlcNAc	3	N2H5F0S0	19	N,1;	1	1061	15	0.416406	34.34	12.98	1154.84	C141H227N30O68S1	1	78.99	16_Pancreas_human_15ug_TR3_240614_f	01AI1,01AII1,01AIII1,BI1,BII1,BIII1,BI2,25AI3,ZI1,ZI2,YI2,YI3,BI4,YI4,YII4,YIII3,MH,02XI1,ZI1,YI1,ZI2,YI2,ZI3,YI3,YI1,	1154.5	3460.49	1154.5	1	0	01Y41Y41M(31M)61M(31M)61M	354.86	7	15.79
Q02817_TINGIHSNISVSYLEGCYPR_8_HexNAc(5)Hex(5)Fuc(1)	27295	Q02817	TINGIHSNISVSYLEGCYPR	N8GlcNAcC17Cam	3	N5H5F1S0	0	N,2;	2	1154	8	1.18128	47.95	26.16	1418.62	C175H280N33O86S1	1	131.47	15_bigintes_human_15ug_TR2_240616_f		1418.62	4251.83	1418.62	1	3.24	01Y41Y41M(31M41Y41L31Y)61M61Y(31F)41L	354.65	27	68.42
P04233_GHHNCSESLELEDPSSGLGVTK_4_HexNAc(2)Hex(6)	22334	P04233	GHHNCSESLELEDPSSGLGVTK	N4GlcNAcC5Cam	4	N2H6F0S0	6	N,8;	8	270	4	1.29617	33.2	15.26	934.146	C148H240N31O78S1	1	106.62	18_adg_human_15ug_TR3_240615_f	BI2,BI2,02AI2,45AI3,YI3,YI3,	934.146	3731.55	934.144	1	12.4	01Y41Y41M(31M)61M(31M21M)61M	354.52	32	76.19
P20702_YLNFSESEEKESHVAMHR_3_HexNAc(2)Hex(9)	22448	P20702	YLNFSESEEKESHVAMHR	N3GlcNAc	4	N2H9F0S0	3	N,3;	3	939	3	5.22317	36.98	13.98	1015.67	C164H258N29O87S1	1	112.65	11_Spleen_human_15ug_TR2_231108_f	03AI4,45AI3,04AI4,	1015.67	4057.64	1015.67	1	18.75	01Y41Y41M(31M21M21M)61M(31M21M)61M21M	354.44	21	58.82
P02765_VCQDCPLLAPLNDTR_12_HexNAc(4)Hex(5)NeuAc(2)	29936	P02765	VCQDCPLLAPLNDTR	C2CamC5CamN12GlcNAc	3	N4H5F0S2	0	N,6;	6	156	12	3.1075	46.05	21.15	1326.89	C157H259N28O86S2	1	141.4	21_Bladder_human_15ug_TR3_240619_f		1326.88	3976.62	1326.88	1	15.81	01Y41Y41M(31M)61M(21Y41L32S)61Y41L32S	354.22	23	75
Q86VF7_YKSDLNLTR_6_HexNAc(2)Hex(8)	22231	Q86VF7	YKSDLNLTR	N6GlcNAc	2	N2H8F0S0	0	N,2;	2	1660	6	1.30836	70.79	19.26	1407.1	C112H187N16O66	1	106.19	18_adg_human_15ug_TR2_240615_f		1407.1	2812.18	1407.09	1	2.49	01Y41Y41M(31M21M21M31G)61M(31M)61M	354.21	9	37.5
P00450_EHEGAIYPDNTTDFQR_10_HexNAc(4)Hex(5)Fuc(1)NeuAc(2)	21537	P00450	EHEGAIYPDNTTDFQR	N10GlcNAc	3	N4H5F1S2	3	N,5;	5	138	10	1.68262	40.49	24.93	1415.9	C171H264N29O95	1	100.66	21_Bladder_human_15ug_TR3_240619_f	ZI3,YI3,YI3,	1415.9	4243.67	1415.9	1	1.15	01Y41Y41M(31M)61M(21Y(31F)41L32S)61Y41L32S	354.07	25	76.67
P04217_REGDHEFLEVPEAQEDVEATFPVHQPGNYSCSYR_28_HexNAc(4)Hex(5)NeuAc(2)	33752	P04217	REGDHEFLEVPEAQEDVEATFPVHQPGNYSCSYR	N28GlcNAcC31Cam	5	N4H5F0S2	0	N,3;	3	179	28	2.29623	39.64	18.07	1241.12	C257H387N54O121S1	1	159.69	21_Bladder_human_15ug_TR1_240619_f		1240.92	6197.55	1240.92	1	25.58	01Y41Y41M(31M)61M(21Y41L32S)61Y41L32S	354.04	23	34.85
P06213_GETLEIGNYSFYALDNQNLR_8_HexNAc(2)Hex(8)	29038	P06213	GETLEIGNYSFYALDNQNLR	N8GlcNAc	3	N2H8F0S0	0	N,0;	0	424	8	-5.41619	31.3	14.46	1341.23	C166H260N29O85	1	140.91	02_RE_Liver_human_15ug_TR1_240613_f		1341.23	4019.69	1341.24	1	9.52	01Y41Y41M(31M21M21M31G)61M(31M)61M	353.87	8	18.42
P0C0L4_GLNVTLSSTGR_3_HexNAc(2)Hex(5)	27492	P0C0L4	GLNVTLSSTGR	N3GlcNAc	2	N2H5F0S0	20	N,2;	2	1328	3	6.27294	58.39	12.42	1161.52	C91H158N17O52	1	138.38	human_brain_14ug_TR1_0703_f_new	BI1,BII1,BIII1,CI1,CII1,CIII1,BI2,02XI1,YI1,02XI2,ZI2,YI2,ZI3,YI3,BI4,YI4,YII4,YIII3,MH,02XI1,34XI1,ZI1,YI1,ZI2,YI2,YI3,	1161.52	2321.02	1161.52	1	0	01Y41Y41M(31M)61M(31M)61M	353.76	10	35
P12821_NETHFDAGAK_1_HexNAc(2)Hex(9)	10253	P12821	NETHFDAGAK	N1GlcNAc	3	N2H9F0S0	0	N,6;	6	509	1	1.43185	55.76	34.69	985.717	C116H185N16O72	1	55.16	human_lung_14ug_TR2_0625_f		985.718	2954.13	985.716	1	17.81	01Y41Y41M(31M21M21M31G)61M(31M21M)61M	353.65	26	127.78
P01903_FTPPVVNVTWLR_7_HexNAc(2)Hex(6)	34853	P01903	FTPPVVNVTWLR	N7GlcNAc	2	N2H6F0S0	3	N,4;	4	143	7	4.16181	46.23	16.2	1404.65	C121H192N19O56	1	173.56	11_Spleen_human_15ug_TR2_231108_f	BI2,YI3,YI3,	1404.65	2807.28	1404.64	1	4.77	01Y41Y41M(31M21M)61M(31M)61M	353.6	18	68.18
P16278_NNVITLNITGK_7_HexNAc(2)Hex(5)	24114	P16278	NNVITLNITGK	N7GlcNAc	2	N2H5F0S0	17	N,4;	4	464	7	4.27293	43.31	13.14	1202.56	C97H168N17O52	1	115.17	18_adg_human_15ug_TR1_240615_f	BI1,BII1,BIII1,45AI2,03AI2,CI2,02AI3,BI2,ZI1,YI1,ZI2,YI2,YI3,BI4,YI4,YII4,YIII3,02XI1,ZI1,YI1,YI2,	1202.56	2403.1	1202.56	1	0	01Y41Y41M(31M)61M(31M)61M	353.26	24	105
P35475_FQVNNTRPPHVQLLR_4_HexNAc(2)Hex(9)	22945	P35475	FQVNNTRPPHVQLLR	N4GlcNAc	4	N2H9F0S0	0	N,2;	2	372	4	1.05207	51.12	23.58	922.169	C151H248N29O76	1	109.58	18_adg_human_15ug_TR2_240615_f		921.918	3683.64	921.917	1	4.92	01Y41Y41M(31M21M21M31G31G)61M(31M)61M	353.17	12	39.29
P24821_GPNCSEPECPGNCHLR_3_HexNAc(4)Hex(5)Fuc(1)	13488	P24821	GPNCSEPECPGNCHLR	N3GlcNAcC4CamC9CamC13Cam	3	N4H5F1S0	0	N,1;	1	184	3	0.146384	38.11	24.28	1218.47	C141H227N30O76S3	1	62.3	15_bigintes_human_15ug_TR1_240616_f		1218.81	3652.4	1218.81	2	3.03	01Y41Y41M(31M41Y(31F)41L)61M61Y41L	352.94	23	70
P12110_HAELSFVFLTDGVTGNDSLHESAHSMR_16_HexNAc(4)Hex(5)Fuc(1)NeuAc(1)	34439	P12110	HAELSFVFLTDGVTGNDSLHESAHSMR	N16GlcNAc	4	N4H5F1S1	0	N,2;	2	954	16	0.610788	34.91	22.51	1255.79	C206H323N42O100S1	1	163.32	17_Prostate_human_15ug_TR2_240619_f		1255.54	5017.12	1255.54	1	5.92	01Y41Y41M(31M)61M(21Y41L32S)61Y(31F)41L	352.91	24	46.15
P07998_SNSSMHITDCR_2_HexNAc(2)Hex(8)	13954	P07998	SNSSMHITDCR	N2GlcNAcC10Cam	3	N2H8F0S0	0	N,5;	5	104	2	2.21873	69.23	33.57	1004.38	C113H189N20O70S2	1	72.58	12_Tetis_human_8ug_TR1_231109_f		1004.38	3010.13	1004.38	1	2.58	01Y41Y41M(31M21M21M)61M(31M21M)61M	352.77	22	95
Q7Z3B1_GAWLNR_5_HexNAc(2)Hex(5)	15814	Q7Z3B1	GAWLNR	N5GlcNAc	2	N2H5F0S0	17	N,3;	3	73	5	-1.48437	89.5	22.02	967.408	C78H126N13O43	1	80.44	human_brain_14ug_TR3_0703_f	BI1,BII1,BIII1,YI1,BI2,ZI2,YI2,ZI3,YI3,02XI1,YI4,YII4,YIII3,ZI1,YI1,MH,BI4,ZI2,YI2,YI3,YI4,YII4,YIII3,	966.906	1932.81	966.907	1	0	01Y41Y41M(31M)61M(31M)61M	352.75	14	120
O14773_FLSSSPHLPPSSYFNASGR_15_HexNAc(2)Hex(9)	26094	O14773	FLSSSPHLPPSSYFNASGR	N15GlcNAc	3	N2H9F0S0	0	N,5;	5	443	15	0.158947	45.05	17.91	1306.55	C163H252N27O83	2	124.81	18_adg_human_15ug_TR2_240615_f		1306.55	3915.63	1306.55	1	11.04	01Y41Y41M(31M21M21M31G31G)61M(31M)61M	352.74	20	52.78
Q9Y244_MNFSTLR_2_HexNAc(2)Hex(5)	18245	Q9Y244	MNFSTLR	N2GlcNAc	2	N2H5F0S0	19	N,1;	1	63	2	-0.934265	84.8	24.88	1043.43	C83H138N13O46S1	1	87.23	16_Pancreas_human_15ug_TR3_240614_f	BI1,BII1,BIII1,02XI1,BI2,YI1,02XI2,ZI2,YI2,YI3,02XI1,YI4,YII4,YIII3,BI4,34XI1,ZI1,YI1,ZI2,YI2,ZI3,YI3,YI4,YII4,YIII3,	1042.93	2084.86	1042.93	1	0	01Y41Y41M(31M)61M(31M)61M	352.63	7	33.33
Q96Q89_FSAIAQKVCVPDTLNSSQEK_15_HexNAc(2)Hex(5)	16184	Q96Q89	FSAIAQKVCVPDTLNSSQEK	C9CamN15GlcNAc	3	N2H5F0S0	19	N,1;	1	486	15	-4.24474	24.04	10.31	1147.18	C141H233N28O68S1	1	76.6	04_Stomach_human_15ug_TR1_240614_f	01AI1,01AII1,01AIII1,BI1,BII1,BIII1,BI2,CI1,CII1,CIII1,BI2,45AI3,ZI1,YI1,YI2,YI3,BI4,YI4,YII4,YIII3,02XI1,ZI1,YI1,ZI2,YI2,YI3,YI4,YII4,YIII3,	1147.18	3438.54	1147.18	1	0	01Y41Y41M(31M)61M(31M)61M	352.49	6	15.79
Q9UPQ0_SNQTAYVPAPLRK_2_HexNAc(2)Hex(5)	25247	Q9UPQ0	SNQTAYVPAPLRK	N2GlcNAc	3	N2H5F0S0	17	N,2;	2	275	2	4.58399	43.15	15.57	888.081	C110H182N21O54	1	120.66	18_adg_human_15ug_TR1_240615_f	BI1,BII1,BIII1,BI2,YI1,YI2,YI3,02XI1,03XI1,ZI1,YI1,ZI2,YI2,ZI3,YI3,YI4,YII4,YIII3,02XI1,ZI1,YI1,	888.081	2661.21	888.077	1	0	01Y41Y41M(31M)61M(31M)61M	352.4	8	25
P27169_HANWTLTPLK_3_HexNAc(2)Hex(7)	23838	P27169	HANWTLTPLK	N3GlcNAc	3	N2H7F0S0	3	N,10;	10	253	3	-2.39949	55.39	24.52	908.063	C113H182N17O59	1	115.32	02_RE_Liver_human_15ug_TR2_240613_f	45AI3,YI3,YI3,	908.063	2721.18	908.065	2	9.82	01Y41Y41M(31M)61M(31M21M)61M21M	352.37	23	116.67
Q9UBX5_NHTCNLQQTCYNLQGGFK_1_HexNAc(4)Hex(5)Fuc(1)	23292	Q9UBX5	NHTCNLQQTCYNLQGGFK	N1GlcNAcC4CamC10Cam	3	N4H5F1S0	0	N,4;	4	296	1	0.466808	34.58	26.67	1318.55	C159H252N33O79S2	1	110.26	19_Ovarian_human_15ug_TR1_240617_f		1318.55	3951.62	1318.55	2	2.9	01Y41Y41M(31M41Y(31F)41L)61M61Y41L	352.03	31	88.24
Q16853_YLYLASNHSNK_7_HexNAc(3)Hex(3)Fuc(1)	14874	Q16853	YLYLASNHSNK	N7GlcNAc	3	N3H3F1S0	6	N,15;	15	592	7	0.113213	36.9	19.16	851.376	C107H168N19O52	1	73.43	15_bigintes_human_15ug_TR3_240616_f	BI1,CI1,BI2,CI2,YI3,YI4,	851.376	2551.11	851.376	1	9.36	01Y(61F)41Y41M(31M)61M61Y	351.47	26	115
O60568_EQYIHENYSR_7_HexNAc(2)Hex(8)	14398	O60568	EQYIHENYSR	N7GlcNAc	3	N2H8F0S0	0	N,5;	5	548	7	-0.557296	55.69	27.16	1014.74	C122H190N19O70	1	67.82	18_adg_human_15ug_TR3_240615_f		1014.74	3041.19	1014.74	2	7.62	01Y41Y41M(31M21M21M)61M(31M21M)61M	351.29	19	88.89
Q8N6U8_NSSTSTSSSGSR_1_HexNAc(4)Hex(4)Fuc(1)	17420	Q8N6U8	NSSTSTSSSGSR	N1GlcNAc	2	N4H4F1S0	0	N,0;	0	241	1	8.52082	48.82	23.4	1383.06	C103H175N20O67	1	82.55	18_adg_human_15ug_TR2_240615_f		1383.06	2764.09	1383.05	1	8.49	01Y41Y41M(31M41Y41L)61M61Y31F	351.16	7	22.73
P07585_IADTNITSIPQGLPPSLTELHLDGNK_5_HexNAc(3)Hex(4)NeuAc(1)	35003	P07585	IADTNITSIPQGLPPSLTELHLDGNK	N5GlcNAc	3	N3H4F0S1	12	N,3;	3	211	5	3.84871	41.39	18.47	1432.34	C179H295N36O84	1	166	17_Prostate_human_15ug_TR2_240619_f	02AI2,BI2,BI1,CI1,35AI4,BI2,35AI3,BI3,35AI4,YI5,YI5,YI6,	1432.34	4292.99	1432.34	1	46.73	01Y41Y41M(31M)61M61Y41L32S	351.04	32	64
Q8NFQ8_HLNASNPTEPATIIFTAAR_3_HexNAc(2)Hex(7)	29708	Q8NFQ8	HLNASNPTEPATIIFTAAR	N3GlcNAc	3	N2H7F0S0	2	N,8;	8	286	3	-1.0275	46.11	17.47	1189.2	C147H239N28O73	1	142.38	18_adg_human_15ug_TR3_240615_f	BI2,YI3,	1189.2	3564.59	1189.2	1	4.23	01Y41Y41M(31M21M)61M(31M21M)61M	350.29	30	80.56
P0C0L4_FSDGLESNSSTQFEVKK_8_HexNAc(2)Hex(9)	19543	P0C0L4	FSDGLESNSSTQFEVKK	N8GlcNAc	3	N2H9F0S0	0	N,4;	4	226	8	1.17559	42.84	23.47	1256.85	C152H244N23O86	1	95.1	15_bigintes_human_15ug_TR2_240616_f		1256.86	3767.54	1256.85	2	2.37	01Y41Y41M(31M21M21M31G31G)61M(31M)61M	350.22	23	65.63
P27987_RLNSSSGSGSGSSGSSVSSPSWAGR_3_HexNAc(2)Hex(8)	23709	P27987	RLNSSSGSGSGSSGSSVSSPSWAGR	N3GlcNAc	3	N2H8F0S0	1	N,1;	1	83	3	-1.3902	29.38	15.49	1348.89	C156H256N35O89	2	114.69	02_RE_Liver_human_15ug_TR2_240613_f	03AI3,	1349.22	4043.66	1349.23	1	15.57	01Y41Y41M(31M21M21M)61M(31M21M)61M	350.13	9	16.67
P08648_DKLSPIHIALNFSLDPQAPVDSHGLRPALHYQSK_11_HexNAc(2)Hex(6)	32575	P08648	DKLSPIHIALNFSLDPQAPVDSHGLRPALHYQSK	N11GlcNAc	6	N2H6F0S0	4	N,2;	2	609	11	1.36346	21.16	13.9	858.586	C222H353N50O89	1	152.04	15_bigintes_human_15ug_TR1_240616_f	BI2,BI2,YI3,YI3,	858.419	5143.46	858.418	2	0	01Y41Y41M(31M21M)61M(31M)61M	350.04	25	37.88
P56199_SQNDKFNVSLTVK_7_HexNAc(3)Hex(4)	23517	P56199	SQNDKFNVSLTVK	N7GlcNAc	3	N3H4F0S0	4	N,8;	8	840	7	2.65385	50.66	21.43	913.418	C112H186N21O57	1	110.24	17_Prostate_human_15ug_TR2_240619_f	BII1,CII1,24XII4,YII4,	913.419	2737.23	913.416	1	10.78	01Y41Y41M(31M41Y)61M61M	350.04	27	104.17
Q9Y244_MNFSTLR_2_HexNAc(2)Hex(6)	18226	Q9Y244	MNFSTLR	N2GlcNAc	2	N2H6F0S0	5	N,1;	1	63	2	-0.114527	76.99	20.52	1124.46	C89H148N13O51S1	1	87.32	02_RE_Liver_human_15ug_TR1_240613_f	BI2,CI2,ZI3,YI3,YI3,	1124.46	2246.91	1124.46	1	7.78	01Y41Y41M(31M)61M(31M21M)61M	349.54	7	33.33
P10253_QVVENMTR_5_HexNAc(2)Hex(5)	11730	P10253	QVVENMTR	N5GlcNAc	2	N2H5F0S0	16	N,2;	2	390	5	0.827357	78.63	26.06	1097.46	C85H146N15O49S1	1	54.62	18_adg_human_15ug_TR2_240615_f	BI1,BII1,BIII1,25AI4,ZI1,YI1,ZI2,YI2,ZI3,YI3,ZI4,ZII4,ZIII3,BI4,YI4,YII4,YIII3,02XI1,MH,YI1,YI2,YI3,	1097.46	2192.91	1097.46	1	0	01Y41Y41M(31M)61M(31M)61M	349.28	16	100
P02787_CGLVPVLAENYNK_12_HexNAc(4)Hex(5)NeuAc(2)	29062	P02787	CGLVPVLAENYNK	C1CamN12GlcNAc	3	N4H5F0S2	0	N,5;	5	432	12	2.98841	46.53	22	1228.52	C149H242N23O81S1	1	137.66	21_Bladder_human_15ug_TR2_240619_f		1228.18	3681.52	1228.18	1	15.19	01Y41Y41M(31M)61M(21Y41L32S)61Y41L32S	349.27	26	100
P02751_LDAPTNLQFVNETDSTVLVR_11_HexNAc(4)Hex(5)NeuAc(2)	30938	P02751	LDAPTNLQFVNETDSTVLVR	N11GlcNAc	3	N4H5F0S2	0	N,5;	5	1007	11	3.40488	45.67	23.13	1480.32	C181H295N32O95	1	148.38	18_adg_human_15ug_TR1_240615_f		1480.32	4436.92	1480.31	1	9.59	01Y41Y41M(31M)61M(21Y41L32S)61Y41L32S	349.18	30	73.68
Q16610_HIPGLIHNMTAR_8_HexNAc(2)Hex(5)	21901	Q16610	HIPGLIHNMTAR	N8GlcNAc	3	N2H5F0S0	15	N,6;	6	444	8	-0.415263	43.66	17.3	859.724	C105H175N22O50S1	1	102.48	20_Oesophagus_human_15ug_TR2_240618_f	BI1,BII1,BIII1,BI2,YI1,YI2,YI3,02XI1,ZI1,YI1,YI4,YII4,YIII3,YI2,45XI3,YI3,YI4,YII4,YIII3,02XI1,YI1,	859.724	2576.15	859.724	1	0	01Y41Y41M(31M)61M(31M)61M	348.88	21	90.91
Q86UE3_TMANVSLAFR_4_HexNAc(2)Hex(7)	22182	Q86UE3	TMANVSLAFR	N4GlcNAc	2	N2H7F0S0	3	N,1;	1	57	4	7.48783	71.54	19.82	1326.07	C106H177N16O59S1	1	105.9	18_adg_human_15ug_TR1_240615_f	BI2,BIII3,YI3,YIII3,YI3,YIII3,	1326.07	2650.11	1326.06	2	0	01Y41Y41M(31M21M21M)61M(31M)61M	348.71	7	22.22
Q93015_APNLTAQAAPR_3_HexNAc(2)Hex(5)	22771	Q93015	APNLTAQAAPR	N3GlcNAc	2	N2H5F0S0	20	N,2;	2	226	3	-4.55625	61.09	14.45	1164.01	C93H157N18O50	1	108.67	18_adg_human_15ug_TR3_240615_f	BI1,BII1,BIII1,CI1,CII1,CIII1,BI2,ZI1,YI1,02XI2,ZI2,YI2,ZI3,YI3,BI4,YI4,YII4,YIII3,MH,02XI1,34XI1,ZI1,YI1,ZI2,YI2,YI3,	1164.01	2326.03	1164.02	1	0	01Y41Y41M(31M)61M(31M)61M	348.55	10	30
P42694_NGKSDTNNSGPEINK_7_HexNAc(2)Hex(6)	20567	P42694	NGKSDTNNSGPEINK	N7GlcNAc	3	N2H6F0S0	5	N,3;	3	1285	7	-0.49237	32.56	12.82	985.411	C114H190N23O67	1	103.54	human_brain_14ug_TR2_0703_f	BI2,BI2,YI3,ZI3,YI3,	985.411	2953.22	985.412	1	6.85	01Y41Y41M(31M21M)61M(31M)61M	348.38	11	32.14
Q7Z3B1_GAWLNR_5_HexNAc(2)Hex(7)	14860	Q7Z3B1	GAWLNR	N5GlcNAc	2	N2H7F0S0	5	N,4;	4	73	5	-0.412019	80.17	19.53	1128.96	C90H146N13O53	1	78.12	human_brain_14ug_TR1_0703_f_new	BI2,BI2,ZI3,YI3,YI3,	1129.46	2256.91	1129.46	1	10.29	01Y41Y41M(31M21M)61M(31M21M)61M	348.12	13	110
P15586_GASNLTWR_4_HexNAc(2)Hex(5)	17377	P15586	GASNLTWR	N4GlcNAc	2	N2H5F0S0	18	N,3;	3	405	4	0.654596	70.67	15.61	1060.95	C85H138N15O47	1	82.36	18_adg_human_15ug_TR3_240615_f	BI1,BII1,BIII1,24AI4,BI2,ZI1,YI1,02XI2,ZI2,YI2,ZI3,YI3,YI4,YII4,YIII3,02XI1,BI4,ZI1,YI1,ZI2,YI2,YI3,	1061.45	2120.89	1061.45	1	0	01Y41Y41M(31M)61M(31M)61M	348.07	18	107.14
Q9UBV2_MYSEGSDIVPQSNETALHYFK_13_HexNAc(2)Hex(9)	27635	Q9UBV2	MYSEGSDIVPQSNETALHYFK	N13GlcNAc	3	N2H9F0S0	0	N,3;	3	431	13	1.65576	40.02	20.02	1428.26	C177H275N28O91S1	1	133.35	16_Pancreas_human_15ug_TR1_240614_f		1428.26	4280.75	1428.26	1	17.24	01Y41Y41M(31M21M21M)61M(31M21M)61M21M	347.94	26	62.5
Q07954_LHKDNTTCYEFK_5_HexNAc(2)Hex(5)	13728	Q07954	LHKDNTTCYEFK	N5GlcNAcC8Cam	2	N2H5F0S0	19	N,0;	0	1575	5	1.26926	29.8	15.38	1387.08	C114H179N20O57S1	1	64.63	16_Pancreas_human_15ug_TR2_240614_f	BI1,BII1,BIII1,CI1,CII1,CIII1,BI2,ZI1,YI1,35XI2,ZI2,YI2,BI4,ZI3,YI3,ZI4,ZII4,ZIII3,YI4,YII4,YIII3,MH,02XI1,35XI1,ZI1,YI1,YI2,	1387.08	2772.14	1387.08	1	0	01Y41Y41M(31M)61M(31M)61M	347.86	8	22.73
Q16363_HVNEINATIYLLK_6_HexNAc(5)Hex(4)Fuc(1)	30737	Q16363	HVNEINATIYLLK	N6GlcNAc	3	N5H4F1S0	0	N,7;	7	315	6	2.84152	38.05	15.25	1113.85	C140H230N23O69	1	147.53	10_Fat_human_15ug_TR3_231011_f		1113.52	3337.52	1113.51	1	7.48	01Y41Y41M(31M41Y41L31Y)61M61Y31F	347.65	26	104.17
P01009_YLGNATAIFFLPDEGK_4_HexNAc(4)Hex(6)Fuc(1)NeuAc(1)	38435	P01009	YLGNATAIFFLPDEGK	N4GlcNAc	3	N4H6F1S1	0	N,7;	7	271	4	4.10662	40.1	19.69	1327.24	C168H262N23O86	2	183.11	21_Bladder_human_15ug_TR1_240619_f		1327.24	3977.68	1327.23	1	7.14	01Y41Y41M(31M(21Y(31F)41L32S)41Y41L)61M61M	347.57	31	93.33
P16870_GNETIVNLIHSTR_2_HexNAc(2)Hex(6)	22929	P16870	GNETIVNLIHSTR	N2GlcNAc	3	N2H6F0S0	3	N,6;	6	139	2	-1.43787	56.46	24.65	945.089	C113H191N22O61	2	116.19	human_brain_14ug_TR1_0703_f_new	BI2,BI2,YI3,	945.089	2832.25	945.09	1	0	01Y41Y41M(31M21M)61M(31M)61M	347.41	24	91.67
P01860_EEQYNSTFR_5_HexNAc(5)Hex(3)Fuc(1)	15633	P01860	EEQYNSTFR	N5GlcNAc	2	N5H3F1S0	0	N,3;	3	227	5	1.94412	52.24	20.67	1411.57	C114H178N19O63	1	71.98	21_Bladder_human_15ug_TR1_240619_f		1411.57	2821.13	1411.57	1	4.84	01Y41Y41M(31M41Y)61M(21Y31F)61Y	347.19	17	87.5
P20645_LKPLFNK_6_HexNAc(2)Hex(7)	19843	P20645	LKPLFNK	N6GlcNAc	3	N2H7F0S0	4	N,4;	4	57	6	1.45368	57.6	21.62	801.03	C100H167N12O54	1	101.73	12_Tetis_human_8ug_TR3_231109_f	BI2,ZI3,YI3,YI3,	801.03	2400.07	801.029	1	7.73	01Y41Y41M(31M21M)61M(31M21M)61M	346.96	15	116.67
Q13683_NITLDCAR_1_HexNAc(2)Hex(5)	16890	Q13683	NITLDCAR	N1GlcNAcC6Cam	2	N2H5F0S0	15	N,3;	3	989	1	1.96542	65.27	17.5	1090.46	C84H144N15O49S1	1	78.13	17_Prostate_human_15ug_TR1_240619_f	BI1,BII1,BIII1,24AI4,BI2,YI1,ZI2,YI2,YI3,YI4,YII4,YIII3,BI4,02XI1,ZI1,YI1,ZI2,YI2,YI3,	1090.46	2178.9	1090.45	1	0	01Y41Y41M(31M)61M(31M)61M	346.86	18	107.14
P69849_ENVGIYNLSK_7_HexNAc(2)Hex(6)	21637	P69849	ENVGIYNLSK	N7GlcNAc	2	N2H6F0S0	3	N,10;	10	618	7	3.22177	43.51	14.65	1258.54	C102H168N15O57	1	103.2	18_adg_human_15ug_TR3_240615_f	BI2,YI3,YI3,	1258.54	2515.07	1258.54	1	2.09	01Y41Y41M(31M21M)61M(31M)61M	346.77	26	127.78
P02749_VYKPSAGNNSLYR_8_HexNAc(4)Hex(5)NeuAc(2)	16597	P02749	VYKPSAGNNSLYR	N8GlcNAc	3	N4H5F0S2	0	N,2;	2	162	8	-0.0157332	40.22	22.22	1225.51	C149H238N25O81	1	78.57	18_adg_human_15ug_TR3_240615_f		1225.52	3673.53	1225.52	1	8.56	01Y41Y41M(31M)61M(21Y41L32S)61Y41L32S	346.76	15	50
Q8N8J6_THTGEKPFICNK_11_HexNAc(2)Hex(8)	17887	Q8N8J6	THTGEKPFICNK	C10CamN11GlcNAc	3	N2H8F0S0	2	N,1;	1	375	11	5.2418	44.84	17.52	1045.77	C126H205N20O69S1	1	85.66	02_RE_Liver_human_15ug_TR1_240613_f	ZI3,YI3,	1045.77	3134.29	1045.77	1	7.32	01Y41Y41M(31M21M)61M(31M21M)61M21M	346.66	7	22.73
Q96MR6_IMQENVSLIKEINELR_5_HexNAc(2)Hex(4)	27192	Q96MR6	IMQENVSLIKEINELR	N5GlcNAc	3	N2H4F0S0	22	N,1;	1	1137	5	6.88178	33.54	10.9	995.821	C123H212N25O57S1	1	130.74	10_Fat_human_15ug_TR3_231011_f	01AII2,BI1,BII1,BII2,15AII2,BII2,BI2,02AI3,ZI1,YI1,YI2,BI3,YII3,ZI3,ZII4,YI3,YII4,MH,02XI1,ZI1,YI1,YI2,YII3,YI3,YII4,YI1,	995.486	2983.42	995.479	1	0	01Y41Y41M(31M21M)61M	346.41	7	20
P05543_VTACHSSQPNATLYK_10_HexNAc(4)Hex(5)NeuAc(2)	15931	P05543	VTACHSSQPNATLYK	C4CamN10GlcNAc	3	N4H5F0S2	2	N,8;	8	36	10	0.658326	41.6	24.38	1295.2	C155H250N27O85S1	1	73.88	21_Bladder_human_15ug_TR3_240619_f	BI4,BII4,YI3,YII3,	1295.2	3881.58	1295.2	1	21.37	01Y41Y41M(31M41Y41L32S)61M61Y41L32S	346.13	24	78.57
P04233_YGNMTEDHVMHLLQNADPLK_3_HexNAc(2)Hex(7)	33543	P04233	YGNMTEDHVMHLLQNADPLK	N3GlcNAc	4	N2H7F0S0	4	N,4;	4	136	3	0.119926	40.59	15.5	967.913	C158H253N30O77S2	1	166.31	11_Spleen_human_15ug_TR3_231108_f_24580-	03AI4,BI3,YI3,YI3,	967.913	3866.62	967.913	2	27.68	01Y41Y41M(31M)61M(31M21M)61M21M	346	22	57.89
P51884_KLHINHNNLTESVGPLPK_8_HexNAc(5)Hex(5)Fuc(1)NeuAc(1)	20838	P51884	KLHINHNNLTESVGPLPK	N8GlcNAc	4	N5H5F1S1	0	N,1;	1	127	8	1.27777	48.97	21.69	1069.49	C176H290N33O88	1	96.5	15_bigintes_human_15ug_TR1_240616_f		1069.74	4273.92	1069.74	1	1.36	01Y41Y41M(31M41Y)61M61Y(31F)41L31Y41L32S	345.94	18	50
P01876_LSLHRPALEDLLLGSEANLTCTLTGLR_18_HexNAc(4)Hex(5)NeuAc(2)	44014	P01876	LSLHRPALEDLLLGSEANLTCTLTGLR	N18GlcNAcC21Cam	4	N4H5F0S2	0	N,3;	3	144	18	2.54106	43.22	26.14	1293.6	C212H356N43O102S1	1	212.32	21_Bladder_human_15ug_TR2_240619_f		1293.35	5168.37	1293.35	1	8.18	01Y41Y41M(31M)61M(21Y41L32S)61Y41L32S	345.67	24	46.15
O75096_EGGPDHNYTKEK_7_HexNAc(3)Hex(5)	14107	O75096	EGGPDHNYTKEK	N7GlcNAc	3	N3H5F0S0	0	N,0;	0	1801	7	-3.08347	27.99	14.68	932.047	C112H177N20O62	1	74.86	human_intestine_14ug_TR2_0704_f_new		932.38	2794.13	932.383	1	6.7	01Y41Y41M(31M)(41Y)61M31M21M	345.32	8	22.73
P61647_SPATAVPRATNSTYLNEK_11_HexNAc(5)Hex(5)NeuAc(1)	35788	P61647	SPATAVPRATNSTYLNEK	N11GlcNAc	4	N5H5F0S1	0	N,1;	1	66	11	9.63756	57.85	21.21	1010.45	C163H267N30O87	1	172.39	19_Ovarian_human_15ug_TR3_240617_f		1010.45	4036.74	1010.44	1	30.86	01Y41Y41M(31M41Y)61M61Y41L31Y41L32S	344.89	7	17.65
O14773_FLSSSPHLPPSSYFNASGR_15_HexNAc(2)Hex(5)	26575	O14773	FLSSSPHLPPSSYFNASGR	N15GlcNAc	3	N2H5F0S0	14	N,7;	7	443	15	1.28443	42.36	12.94	1090.15	C139H212N27O63	1	127.15	18_adg_human_15ug_TR3_240615_f	BI1,BII1,BIII1,BI2,YI1,YI2,YI3,BI4,02XI1,ZI1,YI1,ZI2,YI2,YI3,YI4,YII4,YIII3,YI1,	1090.15	3267.42	1090.15	1	0	01Y41Y41M(31M)61M(31M)61M	344.82	23	61.11
Q92626_VNNCSDMCFHQK_2_HexNAc(2)Hex(5)	13236	Q92626	VNNCSDMCFHQK	N2GlcNAcC4CamC8Cam	3	N2H5F0S0	14	N,0;	0	730	2	0.198654	42.8	18.48	919.685	C107H171N22O56S3	1	61.13	15_bigintes_human_15ug_TR1_240616_f	01AI1,01AII1,01AIII1,BI1,BII1,BIII1,BI2,45AI2,YI1,YI2,02XI1,ZI1,YI1,YI2,YI3,YI4,YII4,YIII3,ZI1,YI1,	919.685	2756.04	919.685	1	0	01Y41Y41M(31M)61M(31M)61M	344.76	22	90.91
P35568_LHPPLNHSR_6_HexNAc(2)Hex(8)	14741	P35568	LHPPLNHSR	N6GlcNAc	2	N2H8F0S0	0	N,1;	1	370	6	4.43986	68.68	20.47	1387.59	C111H182N19O62	1	69.35	16_Pancreas_human_15ug_TR1_240614_f		1387.59	2773.17	1387.59	1	5.08	01Y41Y41M(31M21M21M)61M(31M21M)61M	344.59	6	25
P05164_NMSNQLGLLAVNQR_1_HexNAc(2)Hex(6)	27820	P05164	NMSNQLGLLAVNQR	N1GlcNAc	3	N2H6F0S0	4	N,10;	10	355	1	3.7609	42.49	15.99	979.774	C116H199N24O61S1	1	138.83	11_Spleen_human_15ug_TR2_231108_f	01AI2,BI2,CI2,BI2,	979.774	2936.29	979.77	2	0	01Y41Y41M(31M21M)61M(31M)61M	344.42	34	119.23
Q15165_HTNMNLTQLK_5_HexNAc(2)Hex(6)	18367	Q15165	HTNMNLTQLK	N5GlcNAc	3	N2H6F0S0	3	N,8;	8	254	5	-0.539633	43.41	17.14	860.035	C102H173N18O56S1	1	87.06	18_adg_human_15ug_TR3_240615_f	BI2,CI2,YI3,	860.371	2578.1	860.371	1	4.5	01Y41Y41M(31M21M)61M(31M)61M	344.42	23	116.67
Q9UPQ0_SNQTAYVPAPLRK_2_HexNAc(2)Hex(6)	24954	Q9UPQ0	SNQTAYVPAPLRK	N2GlcNAc	2	N2H6F0S0	3	N,2;	2	275	2	6.42633	49.29	13.49	1413.15	C116H192N21O59	1	119.25	18_adg_human_15ug_TR1_240615_f	BI2,ZI3,YI3,	1412.65	2823.27	1412.64	1	4.74	01Y41Y41M(31M21M)61M(31M)61M	344.33	8	20.83
Q96AY3_YHYNGTFEDGK_4_HexNAc(2)Hex(7)	15236	Q96AY3	YHYNGTFEDGK	N4GlcNAc	3	N2H7F0S0	4	N,6;	6	70	4	0.146727	45.51	22.66	958.373	C118H176N17O65	1	72.23	18_adg_human_15ug_TR1_240615_f	BI2,BIII3,CI2,CIII3,BI2,BIII3,YI3,YIII3,	958.039	2871.1	958.039	1	4.87	01Y41Y41M(31M21M21M)61M(31M)61M	344.08	23	105
P05556_CHEGNGTFECGACR_5_HexNAc(4)Hex(5)	13069	P05556	CHEGNGTFECGACR	C1CamN5GlcNAcC10CamC13Cam	3	N4H5F0S0	5	N,2;	2	481	5	0.928293	42.85	31.97	1093.74	C125H198N27O69S3	1	69.16	human_lung_14ug_TR2_0625_f	01AI3,BI3,CI3,YI3,YI3,	1093.41	3277.2	1093.41	2	28.23	01Y41Y41M(31M)61M(21Y41L)61Y41L	343.92	21	76.92
Q86UE3_TMANVSLAFR_4_HexNAc(2)Hex(5)	22307	Q86UE3	TMANVSLAFR	N4GlcNAc	2	N2H5F0S0	18	N,1;	1	57	4	8.30986	67.32	16.46	1164.02	C94H157N16O49S1	1	106.48	18_adg_human_15ug_TR1_240615_f	BI1,BII1,BIII1,BI2,ZI1,YI1,ZI2,YI2,ZI3,YI3,BI4,YI4,YII4,YIII3,MH,02XI1,34XI1,ZI1,YI1,ZI2,YI2,YI3,	1164.02	2326	1164.01	1	0	01Y41Y41M(31M)61M(31M)61M	343.84	9	33.33
P23141_NATSYPPMCTQDPK_1_HexNAc(2)Hex(9)	15209	P23141	NATSYPPMCTQDPK	N1GlcNAcC9Cam	3	N2H9F0S0	2	N,8;	8	79	1	1.73462	36.97	20.33	1159.45	C137H221N20O79S2	1	72.1	18_adg_human_15ug_TR1_240615_f	45AI3,45AI4,	1159.12	3474.33	1159.12	2	1.97	01Y41Y41M(31M21M21M)61M(31M21M)61M21M	343.74	29	100
Q5JRA6_KIQQESLGSAPLMGDDHPNASR_19_HexNAc(2)Hex(6)	20315	Q5JRA6	KIQQESLGSAPLMGDDHPNASR	N19GlcNAc	4	N2H6F0S0	3	N,9;	9	589	19	-1.375	38.93	16.68	933.912	C149H246N33O75S1	1	96.83	18_adg_human_15ug_TR1_240615_f	BI2,CI2,YI3,	933.66	3729.62	933.661	2	0	01Y41Y41M(31M21M)61M(31M)61M	343.73	24	57.14
P00738_VVLHPNYSQVDIGLIK_6_HexNAc(5)Hex(6)NeuAc(2)	29993	P00738	VVLHPNYSQVDIGLIK	N6GlcNAc	3	N5H6F0S2	1	N,7;	7	241	6	1.07045	45.68	25.87	1456.31	C181H295N28O94	1	143.14	19_Ovarian_human_15ug_TR2_240617_f	CIII3,	1456.31	4364.92	1456.31	2	2.19	01Y41Y41M(31M41Y41L)61M(21Y41L32S)61Y41L32S	343.62	27	83.33
P20774_VIHLQFNNIASITDDTFCKANDTSYIR_21_HexNAc(4)Hex(5)Fuc(1)NeuAc(1)	36578	P20774	VIHLQFNNIASITDDTFCKANDTSYIR	C18CamN21GlcNAc	4	N4H5F1S1	0	N,4;	4	258	21	2.91672	42.61	22.43	1305.58	C217H344N43O102S1	1	173.89	17_Prostate_human_15ug_TR2_240619_f		1305.33	5216.28	1305.33	2	5.72	01Y41Y41M(31M)61M(21Y(31F)41L32S)61Y41L	343.05	21	40.38
Q15111_ATESFAWNITVLK_8_HexNAc(2)Hex(5)	21675	Q15111	ATESFAWNITVLK	N8GlcNAc	3	N2H5F0S0	18	N,2;	2	1030	8	-1.41749	44.42	13.68	899.741	C115H183N18O55	1	100.47	15_bigintes_human_15ug_TR1_240616_f	BI1,BII1,BIII1,BI2,YI1,ZI2,YI2,YI3,02XI1,ZI1,YI1,02XI2,YI2,ZI3,YI3,YI4,YII4,YIII3,02XI1,ZI1,YI1,YI2,	899.741	2696.21	899.742	1	0	01Y41Y41M(31M)61M(31M)61M	342.45	9	29.17
Q9HDB9_GKHWANQCHSK_6_HexNAc(3)Hex(5)	13812	Q9HDB9	GKHWANQCHSK	N6GlcNAcC8Cam	2	N3H5F0S0	1	N,1;	1	593	6	6.22571	37.77	17.88	1387.08	C111H175N24O56S1	1	65.06	16_Pancreas_human_15ug_TR2_240614_f	23AI3,	1387.08	2772.13	1387.07	1	5.38	01Y41Y41M(31M)(41Y)61M31M21M	341.92	7	25
P29622_TTPKDFYVDENTTVR_11_HexNAc(4)Hex(5)	14481	P29622	TTPKDFYVDENTTVR	N11GlcNAc	3	N4H5F0S0	0	N,1;	1	238	11	3.90181	47.04	22.93	1137.16	C140H223N24O73	1	71.67	15_bigintes_human_15ug_TR2_240616_f		1137.16	3408.45	1137.16	1	45.65	01Y41Y41M(31M41Y41L)61M61Y41L	341.84	7	17.86
P53634_DVNCSVMGPQEK_3_HexNAc(2)Hex(6)	13831	P53634	DVNCSVMGPQEK	N3GlcNAcC4Cam	2	N2H6F0S0	4	N,6;	6	53	3	0.841105	54.13	24.26	1372.55	C106H177N18O61S2	1	65.35	18_adg_human_15ug_TR1_240615_f	CI2,BI2,45AI3,YI3,	1372.04	2742.07	1372.04	1	4.51	01Y41Y41M(31M21M)61M(31M)61M	341.64	27	109.09
P01860_EEQYNSTFR_5_HexNAc(4)Hex(3)	15955	P01860	EEQYNSTFR	N5GlcNAc	2	N4H3F0S0	0	N,1;	1	227	5	4.72554	55.08	16.11	1237.51	C100H155N18O54	1	73.53	21_Bladder_human_15ug_TR1_240619_f		1237.01	2471.99	1237	1	32.74	01Y41Y41M(31M41Y)61M61Y	341.48	12	56.25
P11279_LLNINPNK_7_HexNAc(2)Hex(6)	19605	P11279	LLNINPNK	N7GlcNAc	2	N2H6F0S0	4	N,5;	5	261	7	2.34351	67.88	24.32	1153.02	C93H159N14O52	1	100.89	12_Tetis_human_8ug_TR2_231109_f	BI2,ZI3,YI3,YI3,	1153.02	2304.02	1153.02	1	20.09	01Y41Y41M(31M)61M(31M21M)61M	341.3	17	107.14
P23378_LNSSSELAPITWK_2_HexNAc(2)Hex(6)	24026	P23378	LNSSSELAPITWK	N2GlcNAc	3	N2H6F0S0	6	N,2;	2	563	2	6.68083	39.43	15.55	942.425	C117H191N18O61	1	123.38	human_intestine_14ug_TR1_0704_f	BI2,CI2,BI2,YI3,ZI3,YI3,	942.426	2824.24	942.419	1	18.05	01Y41Y41M(31M)61M(31M21M)61M	341.09	10	29.17
Q92542_KIYIPLNK_7_HexNAc(2)Hex(9)	19573	Q92542	KIYIPLNK	N7GlcNAc	3	N2H9F0S0	0	N,5;	5	45	7	-1.23986	60.36	28.67	952.091	C118H198N13O66	1	94.12	02_RE_Liver_human_15ug_TR2_240613_f		952.089	2853.25	952.091	1	2.54	01Y41Y41M(31M21M21M31G)61M(31M21M)61M	340.96	19	128.57
Q96KA5_VKDLMVINR_8_HexNAc(2)Hex(7)	19320	Q96KA5	VKDLMVINR	N8GlcNAc	3	N2H7F0S0	3	N,6;	6	229	8	0.434522	61.67	24.74	877.06	C105H183N16O58S1	1	92.29	16_Pancreas_human_15ug_TR1_240614_f	BI2,YI3,YI3,	877.059	2628.16	877.059	1	7.68	01Y41Y41M(31M21M)61M(31M21M)61M	340.62	20	112.5
Q9Y4L1_AEPPLNASASDQGEK_6_HexNAc(2)Hex(6)	15363	Q9Y4L1	AEPPLNASASDQGEK	N6GlcNAc	2	N2H6F0S0	2	N,8;	8	931	6	2.5282	52.12	28.97	1447.1	C114H187N20O66	2	79.78	12_Tetis_human_8ug_TR2_231109_f	BI2,YI3,	1447.1	2892.19	1447.1	1	0	01Y41Y41M(31M21M)61M(31M)61M	340.59	31	100
P01009_YLGNATAIFFLPDEGKLQHLENELTHDIITK_4_HexNAc(4)Hex(5)NeuAc(2)	45005	P01009	YLGNATAIFFLPDEGKLQHLENELTHDIITK	N4GlcNAc	5	N4H5F0S2	0	N,6;	6	271	4	-0.17022	38.51	20.68	1150.53	C246H387N46O110	1	210.69	15_bigintes_human_15ug_TR3_240616_f		1150.53	5745.61	1150.53	1	14.33	01Y41Y41M(31M)61M(21Y41L32S)61Y41L32S	340.41	29	48.33
P54760_LNGSSLHLEWSAPLESGGREDLTYALR_2_HexNAc(4)Hex(5)NeuAc(2)	40045	P54760	LNGSSLHLEWSAPLESGGREDLTYALR	N2GlcNAc	4	N4H5F0S2	0	N,1;	1	335	2	10.8986	37.58	18.1	1295.34	C214H340N43O104	1	192.47	21_Bladder_human_15ug_TR2_240619_f		1295.34	5176.26	1295.32	1	36.79	01Y41Y41M(31M)61M(21Y41L32S)61Y41L32S	340.16	7	11.54
P55268_CAPNFWNLTSGHGCQPCACHPSR_7_HexNAc(2)Hex(5)	25795	P55268	CAPNFWNLTSGHGCQPCACHPSR	C1CamN7GlcNAcC14CamC17CamC19Cam	4	N2H5F0S0	14	N,0;	0	1085	7	1.13354	27.81	14.3	983.644	C158H241N40O69S4	1	123.35	18_adg_human_15ug_TR3_240615_f	01AI2,BI1,BII1,BIII1,BI2,03AI4,YI1,YI2,YI3,ZI1,YI1,YI2,YI3,YI4,YII4,YIII3,ZI1,YI1,	983.895	3930.55	983.893	1	0	01Y41Y41M(31M)61M(31M)61M	340.1	22	50
P29622_FLNDTMAVYEAK_3_HexNAc(2)Hex(6)	17484	P29622	FLNDTMAVYEAK	N3GlcNAc	3	N2H6F0S0	5	N,1;	1	157	3	-3.94749	42.99	15.91	927.718	C115H183N16O60S1	1	91.59	human_intestine_14ug_TR2_0704_f_new	CI2,BI2,YI3,ZI3,YI3,	927.718	2780.15	927.722	1	14.65	01Y41Y41M(31M)61M(31M21M)61M	340.09	8	18.18
P02787_QQQHLFGSNVTDCSGNFCLFR_16_HexNAc(4)Hex(5)NeuAc(2)	34395	P02787	QQQHLFGSNVTDCSGNFCLFR	C13CamN16GlcNAcC18Cam	3	N4H5F0S2	0	N,0;	0	637	16	2.42177	42.85	27.04	1574.64	C191H296N39O95S2	1	162.48	20_Oesophagus_human_15ug_TR3_240618_f		1574.64	4719.9	1574.64	2	26.44	01Y41Y41M(31M)61M(21Y41L32S)61Y41L32S	339.99	26	62.5
P02751_RHEEGHMLNCTCFGQGR_9_HexNAc(4)Hex(3)	16719	P02751	RHEEGHMLNCTCFGQGR	N9GlcNAcC10CamC12Cam	4	N4H3F0S0	6	N,0;	0	542	9	0.758377	38.99	13.16	848.098	C133H212N35O62S3	1	77.42	15_bigintes_human_15ug_TR1_240616_f	15AI2,01AI2,45AI3,YI3,ZI3,YI3,	847.849	3387.37	847.848	1	4.49	01Y41Y41M(31M)61M(21Y)61Y	339.95	16	50
P12109_NVTAQICIDKK_1_HexNAc(2)Hex(5)	17639	P12109	NVTAQICIDKK	N1GlcNAcC7Cam	3	N2H5F0S0	15	N,4;	4	804	1	0.446121	32.53	12.71	836.377	C100H173N18O53S1	1	81.63	17_Prostate_human_15ug_TR2_240619_f	03AI2,01AI1,01AII1,01AIII1,BI1,BII1,BIII1,BI2,CI3,02XI1,ZI1,YI1,ZI2,YI2,YI3,YI4,YII4,YIII3,02XI1,ZI1,YI1,	836.377	2506.11	836.377	1	0	01Y41Y41M(31M)61M(31M)61M	339.95	25	110
P13473_VQPFNVTQGK_5_HexNAc(4)Hex(5)NeuAc(1)	18010	P13473	VQPFNVTQGK	N5GlcNAc	2	N4H5F0S1	2	N,2;	2	356	5	1.15845	42.7	21.94	1516.65	C123H200N19O68	1	85.37	18_adg_human_15ug_TR2_240615_f	03AI5,35AI5,	1516.65	3031.28	1516.64	1	9.77	01Y41Y41M(31M41Y41L)61M61Y41L32S	339.93	19	88.89
Q15293_VVRPDSELGERPPEDNQSFQYDHEAFLGKEDSK_16_HexNAc(4)Hex(3)Fuc(1)	23930	Q15293	VVRPDSELGERPPEDNQSFQYDHEAFLGKEDSK	N16GlcNAc	5	N4H3F1S0	0	N,0;	0	53	16	-0.558928	45.67	18.09	1053.87	C221H341N50O98	1	114.32	18_adg_human_15ug_TR2_240615_f		1053.87	5263.32	1053.87	1	15.38	01Y41Y41M(31M41Y31F)61M61Y	339.9	16	25
Q8TD19_RTFDATNPLNLCVK_10_HexNAc(2)Hex(7)	29386	Q8TD19	RTFDATNPLNLCVK	N10GlcNAcC12Cam	3	N2H7F0S0	4	N,2;	2	258	10	3.22119	37.44	13.97	1064.14	C129H214N23O67S1	1	140.77	18_adg_human_15ug_TR1_240615_f	BI2,BIII3,BI2,BIII3,ZI3,ZIII3,YI3,YIII3,	1064.14	3189.38	1064.13	1	8.93	01Y41Y41M(31M21M21M)61M(31M)61M	339.74	10	30.77
Q15223_NPNGTVTVISR_3_HexNAc(3)Hex(5)	15047	Q15223	NPNGTVTVISR	N3GlcNAc	2	N3H5F0S0	4	N,1;	1	202	3	5.00179	62.81	18.43	1289.58	C102H174N19O57	1	76.78	human_brain_14ug_TR3_0703_f	BIII1,CIII1,02AIII2,YIII4,	1289.58	2577.13	1289.57	2	9.93	01Y41Y41M(31M41Y)61M(31M)61M	339.5	18	75
P12109_NVTAQICIDK_1_HexNAc(3)Hex(5)	19904	P12109	NVTAQICIDK	N1GlcNAcC7Cam	2	N3H5F0S0	5	N,5;	5	804	1	2.11389	45.9	22.74	1291.56	C102H174N17O57S1	1	92.7	17_Prostate_human_15ug_TR2_240619_f	45AI3,BII3,CII3,YII3,YII3,	1291.56	2581.1	1291.55	1	32.24	01Y41Y41M(31M41Y41L)61M61M	339.42	24	116.67
P98160_TRNQELEDNVHISPNGSIITIVGTRPSNHGTYR_15_HexNAc(4)Hex(4)Fuc(1)	26149	P98160	TRNQELEDNVHISPNGSIITIVGTRPSNHGTYR	N15GlcNAc	6	N4H4F1S0	0	N,0;	0	3072	15	0.452919	34.47	15.77	881.75	C217H354N55O97	1	121.26	15_bigintes_human_15ug_TR1_240616_f		881.582	5282.45	881.582	1	1.09	01Y41Y41M(31M)61M(21Y(31F)41L)61Y	339.39	18	28.13
P01877_TPLTANITK_6_HexNAc(5)Hex(5)Fuc(1)	14546	P01877	TPLTANITK	N6GlcNAc	2	N5H5F1S0	0	N,4;	4	205	6	0.662356	40.57	18.7	1466.14	C118H201N16O68	2	71.98	15_bigintes_human_15ug_TR2_240616_f		1466.14	2930.28	1466.14	1	14.64	01Y(61F)41Y41M(31M41Y41L31Y)61M61Y41L	339.23	22	118.75
Q8NBI3_EHLCTPHNRGLNNK_13_HexNAc(2)Hex(10)	13175	Q8NBI3	EHLCTPHNRGLNNK	C4CamN13GlcNAc	4	N2H10F0S0	2	N,1;	1	302	13	0.550093	40.06	15.92	930.135	C145H239N28O82S1	1	62.09	02_RE_Liver_human_15ug_TR3_240613_f	YIII3,YIII3,	930.135	3716.51	930.134	1	7.1	01Y41Y41M(31M21M21M31G31G21G)61M(31M)61M	339.15	7	23.08
P11047_LLNNLTSIK_4_HexNAc(2)Hex(8)	21828	P11047	LLNNLTSIK	N4GlcNAc	2	N2H8F0S0	1	N,2;	2	650	4	2.81655	48.56	15.58	1360.11	C109H189N14O64	2	104.25	18_adg_human_15ug_TR1_240615_f	25XI4,25XII4,	1360.11	2718.2	1360.1	1	15.71	01Y41Y41M(31M21M21M)61M(31M21M)61M	339.04	20	106.25
P02675_GTAGNALMDGASQLMGENR_18_HexNAc(4)Hex(5)	29910	P02675	GTAGNALMDGASQLMGENR	N18GlcNAc	3	N4H5F0S0	0	N,11;	11	394	18	2.17734	40.11	27.04	1172.82	C136H228N29O74S2	1	143.07	19_Ovarian_human_15ug_TR3_240617_f		1172.82	3515.44	1172.82	1	21.17	01Y41Y41M(31M41Y41L)61M61Y41L	338.97	34	88.89
P13473_VQPFNVTQGK_5_HexNAc(2)Hex(6)	18602	P13473	VQPFNVTQGK	N5GlcNAc	2	N2H6F0S0	3	N,4;	4	356	5	1.37781	47.65	16.83	1249.54	C102H167N16O55	1	86.94	20_Oesophagus_human_15ug_TR2_240618_f	BI2,YI3,YI3,	1249.05	2496.08	1249.04	1	4.59	01Y41Y41M(31M21M)61M(31M)61M	338.84	22	105.56
P51884_LHINHNNLTESVGPLPK_7_HexNAc(4)Hex(5)Fuc(2)	23054	P51884	LHINHNNLTESVGPLPK	N7GlcNAc	4	N4H5F2S0	0	N,9;	9	127	7	1.03626	22.07	20.73	950.686	C157H258N29O78	1	108.01	17_Prostate_human_15ug_TR2_240619_f		950.686	3797.71	950.685	1	3.83	01Y41Y41M(31M41Y(31F)41L)61M61Y(31F)41L	338.57	24	68.75
Q5THJ4_QLNLTIR_3_HexNAc(2)Hex(8)	15705	Q5THJ4	QLNLTIR	N3GlcNAc	2	N2H8F0S0	0	N,1;	1	3263	3	1.20863	75.99	23.47	1281.06	C101H175N14O61	2	74.82	02_RE_Liver_human_15ug_TR1_240613_f		1281.06	2560.1	1281.06	1	7.92	01Y41Y41M(31M21M21M)61M(31M21M)61M	338.49	9	50
Q16620_NLTIVDSGLK_1_HexNAc(2)Hex(8)	20940	Q16620	NLTIVDSGLK	N1GlcNAc	2	N2H8F0S0	3	N,5;	5	95	1	-0.439679	52.53	14.6	1382.1	C110H189N14O66	1	104.24	human_brain_14ug_TR3_0703_f	45AI3,YI3,YI3,	1382.1	2762.19	1382.1	1	10.73	01Y41Y41M(31M21M)61M(31M21M)61M21M	338.32	26	122.22
P24821_NTTSYVLR_1_HexNAc(4)Hex(3)Fuc(1)	14429	P24821	NTTSYVLR	N1GlcNAc	2	N4H3F1S0	0	N,1;	1	1034	1	1.40441	53.65	23.46	1200.03	C97H161N16O53	1	71.39	15_bigintes_human_15ug_TR3_240616_f		1200.03	2398.04	1200.02	1	5.86	01Y41Y41M(31M41Y31F)61M61Y	338.31	15	85.71
Q16585_ITSNATSDLNIK_4_HexNAc(2)Hex(5)	20334	Q16585	ITSNATSDLNIK	N4GlcNAc	2	N2H5F0S0	16	N,6;	6	211	4	4.43052	55.86	22.1	1247.56	C99H170N17O56	1	106.3	14_Muscle_human_10ug_TR3_231113_f	03AI2,BI1,BII1,BIII1,CI1,CII1,CIII1,02XI1,ZI1,YI1,ZI2,YI2,YI3,BI4,YI4,YII4,YIII3,02XI1,ZI1,YI1,YI2,YI3,	1247.56	2493.1	1247.55	1	0	01Y41Y41M(31M)61M(31M)61M	338.18	25	100
Q9NY15_SLEAQGNSSHLDADTVR_7_HexNAc(2)Hex(8)	15402	Q9NY15	SLEAQGNSSHLDADTVR	N7GlcNAc	3	N2H8F0S0	3	N,12;	12	1178	7	1.30052	38.59	19.67	1169.15	C136H225N26O80	1	73.03	18_adg_human_15ug_TR1_240615_f	04AI4,YI3,YI3,	1168.49	3502.43	1168.48	1	24.02	01Y41Y41M(31M21M)61M(31M21M)61M21M	337.69	29	87.5
P54289_IDVNSWIENFTK_9_HexNAc(2)Hex(7)	31389	P54289	IDVNSWIENFTK	N9GlcNAc	2	N2H7F0S0	2	N,7;	7	824	9	-6.13448	44.25	17.35	1504.64	C125H197N18O66	1	156.13	human_brain_14ug_TR2_0703_f	BI2,BIII3,YI3,YIII3,	1504.13	3006.26	1504.14	1	2.03	01Y41Y41M(31M21M21M)61M(31M)61M	337.5	29	122.73
P02751_HEEGHMLNCTCFGQGR_8_HexNAc(4)Hex(5)NeuAc(2)	20816	P02751	HEEGHMLNCTCFGQGR	N8GlcNAcC9CamC11Cam	3	N4H5F0S2	0	N,3;	3	542	8	1.69884	41.52	21.08	1380.53	C161H254N33O87S3	1	96.5	21_Bladder_human_15ug_TR1_240619_f		1380.53	4137.56	1380.53	1	11.58	01Y41Y41M(31M41Y41L32S)61M61Y41L32S	337.38	22	66.67
Q01459_QINSSISGNLWDKDQR_3_HexNAc(2)Hex(6)	22658	Q01459	QINSSISGNLWDKDQR	N3GlcNAc	3	N2H6F0S0	4	N,5;	5	299	3	-0.155967	45.13	23.69	1080.8	C130H212N27O68	1	108.14	18_adg_human_15ug_TR3_240615_f	BI2,BI2,YI3,YI3,	1080.8	3239.4	1080.8	1	16.24	01Y41Y41M(31M)61M(31M21M)61M	337.21	24	76.67
P01859_EEQFNSTFR_5_HexNAc(4)Hex(4)	19543	P01859	EEQFNSTFR	N5GlcNAc	2	N4H4F0S0	5	N,1;	1	176	5	0.896538	58.19	21.37	1310.03	C106H165N18O58	1	90.91	21_Bladder_human_15ug_TR3_240619_f	BI2,BI2,YI3,ZI3,YI3,	1310.03	2618.05	1310.03	2	25.55	01Y41Y41M(31M)61M(21Y41L)61Y	336.8	12	56.25
Q9NQ38_SNGTGSESGKDTCDEFR_2_HexNAc(5)Hex(4)Fuc(3)	13117	Q9NQ38	SNGTGSESGKDTCDEFR	N2GlcNAcC13Cam	3	N5H4F3S0	0	N,2;	2	763	2	1.72041	65.25	30	1317.52	C153H247N28O90S1	1	60.41	20_Oesophagus_human_15ug_TR2_240618_f		1317.52	3948.53	1317.52	2	4.11	01Y(61F)41Y41M(31M41Y(31F)41L31Y)61M61Y31F	336.64	21	56.25
Q15858_KENYISNHTLAEMSK_7_HexNAc(2)Hex(5)	20816	Q15858	KENYISNHTLAEMSK	N7GlcNAc	4	N2H5F0S0	19	N,0;	0	1040	7	5.97312	49.31	14.63	746.33	C121H198N23O61S1	1	100.15	02_RE_Liver_human_15ug_TR3_240613_f	BI1,BII1,BIII1,BI2,03AI4,YI1,YI2,02XI1,25XI1,ZI1,YI1,ZI2,YI2,YI3,02XI1,24XI1,ZI1,YI1,ZI2,YI2,YI3,	746.331	2981.28	746.327	1	0	01Y41Y41M(31M)61M(31M)61M	336.56	7	25
Q15858_KENYISNHTLAEMSK_7_HexNAc(2)Hex(6)	20728	Q15858	KENYISNHTLAEMSK	N7GlcNAc	3	N2H6F0S0	5	N,1;	1	1040	7	8.73872	54	19.72	1048.79	C127H208N23O66S1	1	99.71	02_RE_Liver_human_15ug_TR3_240613_f	BI2,BI2,YI3,ZI3,YI3,	1048.79	3143.33	1048.78	1	20.73	01Y41Y41M(31M21M)61M(31M)61M	336.23	7	21.43
Q92547_QFWNKSAHRPHVVGAK_4_HexNAc(2)Hex(6)	22059	Q92547	QFWNKSAHRPHVVGAK	N4GlcNAc	3	N2H6F0S0	4	N,2;	2	413	4	7.4126	36.79	10.2	1081.5	C137H215N30O60	2	104.07	20_Oesophagus_human_15ug_TR1_240618_f	BI2,BI2,YI3,YI3,	1081.17	3240.47	1081.16	1	0	01Y41Y41M(31M21M)61M(31M)61M	335.92	8	20
P28799_DVECGEGHFCHDNQTCCR_13_HexNAc(3)Hex(4)Fuc(1)NeuAc(1)	12970	P28799	DVECGEGHFCHDNQTCCR	C4CamC10CamN13GlcNAcC16CamC17Cam	3	N3H4F1S1	9	N,3;	3	530	13	-1.01341	44.57	34.49	1326.82	C152H236N35O81S4	1	61.07	18_adg_human_15ug_TR1_240615_f	YI3,YI4,ZI1,YI1,ZI2,YI2,YI3,YI4,YI1,	1326.48	3975.43	1326.48	1	12.81	01Y41Y41M(31M)61M21Y(31F)41L32S	335.86	20	55.88
P43897_DQPSAYSKGFLNSSELSGLPAGPDR_12_HexNAc(2)Hex(7)	20997	P43897	DQPSAYSKGFLNSSELSGLPAGPDR	N12GlcNAc	3	N2H7F0S0	4	N,1;	1	165	12	1.451	34.26	13.21	1379.27	C170H270N33O85	1	100.95	16_Pancreas_human_15ug_TR2_240614_f	BI2,BIII3,BI2,BIII3,YI3,YIII3,YI3,YIII3,	1379.27	4133.78	1379.27	1	7.13	01Y41Y41M(31M21M21M)61M(31M)61M	335.22	7	14.58
Q8NBF1_AFSNSSDR_4_HexNAc(4)Hex(3)Fuc(1)	12130	Q8NBF1	AFSNSSDR	N4GlcNAc	2	N4H3F1S0	0	N,0;	0	305	4	8.00942	44.28	15.23	1164.98	C91H147N16O54	1	56.04	04_Stomach_human_15ug_TR3_240614_f		1164.98	2327.92	1164.97	1	25.5	01Y(61F)41Y41M(31M41Y)61M61Y	335.18	6	28.57
P02751_RHEEGHMLNCTCFGQGR_9_HexNAc(2)Hex(5)	15866	P02751	RHEEGHMLNCTCFGQGR	N9GlcNAcC10CamC12Cam	3	N2H5F0S0	15	N,2;	2	542	9	-2.50893	59.68	27.58	1102.77	C129H206N33O62S3	1	77.94	15_bigintes_human_15ug_TR3_240616_f	BI1,BII1,BIII1,BI2,02XI1,ZI1,YI1,YI2,YI3,YI4,YII4,YIII3,02XI1,MH,ZI1,YI1,YI2,YI3,YI4,YII4,YIII3,	1102.77	3305.31	1102.78	1	0	01Y41Y41M(31M)61M(31M)61M	335.17	17	53.13
Q92674_KEMSLSDCLNR_10_HexNAc(3)Hex(5)	13471	Q92674	KEMSLSDCLNR	C8CamN10GlcNAc	2	N3H5F0S0	1	N,1;	1	334	10	6.44759	40.08	18.66	1387.08	C107H183N20O60S2	1	63.34	04_Stomach_human_15ug_TR2_240614_f	23AI3,	1387.08	2772.13	1387.07	1	7.19	01Y41Y41M(31M)(41Y)61M31M21M	335.01	8	35
P02786_KQNNGAFNETLFR_8_HexNAc(2)Hex(5)	23489	P02786	KQNNGAFNETLFR	N8GlcNAc	3	N2H5F0S0	11	N,7;	7	727	8	0.129296	45.11	16.4	919.404	C113H180N23O56	1	112.17	18_adg_human_15ug_TR1_240615_f	BI1,BII1,BIII1,BI2,YI1,YI2,02XI1,YI1,YI2,YI3,YI4,YII4,YIII3,ZI1,YI1,	919.404	2755.19	919.404	1	0	01Y41Y41M(31M)61M(31M)61M	335.01	28	108.33
P35475_FQVNNTRPPHVQLLR_4_HexNAc(2)Hex(8)	23128	P35475	FQVNNTRPPHVQLLR	N4GlcNAc	4	N2H8F0S0	2	N,2;	2	372	4	-0.947037	48.32	16.23	881.404	C145H238N29O71	1	110.41	18_adg_human_15ug_TR3_240615_f	YI3,YI3,	881.403	3521.59	881.404	1	13.97	01Y41Y41M(31M21M)61M(31M21M)61M21M	334.91	13	42.86
P00450_NLASRPYTFHSHGITYYKEHEGAIYPDNTTDFQR_28_HexNAc(4)Hex(5)NeuAc(2)	24498	P00450	NLASRPYTFHSHGITYYKEHEGAIYPDNTTDFQR	N28GlcNAc	5	N4H5F0S2	3	N,5;	5	138	28	0.466969	43.14	21.49	1248.14	C265H395N56O117	1	117.99	15_bigintes_human_15ug_TR2_240616_f	BIII1,YI3,YI3,	1248.14	6233.67	1248.14	1	27.11	01Y41Y41M(31M)61M(21Y41L32S)61Y41L32S	334.61	20	30.3
P02751_GGNSNGALCHFPFLYNNHNYTDCTSEGRR_19_HexNAc(4)Hex(5)NeuAc(1)	28318	P02751	GGNSNGALCHFPFLYNNHNYTDCTSEGRR	C9CamN19GlcNAcC23Cam	4	N4H5F0S1	0	N,0;	0	430	19	3.26461	53.88	22.79	1319.55	C214H324N51O100S2	1	131.62	15_bigintes_human_15ug_TR1_240616_f		1319.29	5272.13	1319.29	1	9.4	01Y41Y41M(31M)61M(21Y41L32S)61Y41L	334.45	14	25
Q685J3_TVLDNATEVVKEK_5_HexNAc(2)Hex(5)	25712	Q685J3	TVLDNATEVVKEK	N5GlcNAc	3	N2H5F0S0	19	N,2;	2	4267	5	-0.113269	33.66	12.46	888.409	C108H185N18O58	1	123.03	04_Stomach_human_15ug_TR2_240614_f	BI1,BII1,BIII1,BI2,04AI2,02AI2,YI1,YI2,YI3,02XI1,03XI1,ZI1,YI1,ZI2,YI2,ZI3,YI3,YI4,YII4,YIII3,02XI1,ZI1,YI1,	888.409	2662.21	888.409	1	0	01Y41Y41M(31M)61M(31M)61M	334.25	10	29.17
Q9UMR5_DHPNATVWR_4_HexNAc(2)Hex(5)	15006	Q9UMR5	DHPNATVWR	N4GlcNAc	3	N2H5F0S0	20	N,4;	4	206	4	0.813154	55.34	18.34	771.325	C94H147N18O49	1	71.09	18_adg_human_15ug_TR1_240615_f	BI1,BII1,BIII1,BI2,45AI2,03AI2,CI2,YI2,02XI1,ZI1,YI1,02XI2,ZI2,YI2,ZI3,YI3,YI4,YII4,YIII3,02XI1,ZI1,YI1,03XI2,YI2,	771.659	2311.96	771.658	1	0	01Y41Y41M(31M)61M(31M)61M	334.14	17	93.75
P98160_IQGEEIVFHDLNLTAHGISHCPTCR_12_HexNAc(4)Hex(4)Fuc(1)NeuAc(1)	30902	P98160	IQGEEIVFHDLNLTAHGISHCPTCR	N12GlcNAcC21CamC24Cam	4	N4H4F1S1	0	N,0;	0	3836	12	1.43642	44.65	18.07	1201.78	C197H314N43O91S2	1	148.76	15_bigintes_human_15ug_TR3_240616_f		1201.78	4802.07	1201.77	2	4.28	01Y41Y41M(31M)61M(21Y(31F)41L32S)61Y	334.09	19	39.58
P05164_NMSNQLGLLAVNQR_1_HexNAc(2)Hex(5)	28186	P05164	NMSNQLGLLAVNQR	N1GlcNAc	3	N2H5F0S0	11	N,8;	8	355	1	4.02126	38.18	11.86	926.089	C110H189N24O56S1	1	140.06	11_Spleen_human_15ug_TR3_231108_f_24580-	01AI2,BI1,BII1,BIII1,BI2,03AI2,CI2,02XI1,YI1,YI3,02XI1,ZI1,YI1,	925.756	2774.24	925.753	1	0	01Y41Y41M(31M)61M(31M)61M	333.98	33	115.38
P02751_HEEGHMLNCTCFGQGR_8_HexNAc(2)Hex(9)	17574	P02751	HEEGHMLNCTCFGQGR	N8GlcNAcC9CamC11Cam	3	N2H9F0S0	0	N,4;	4	542	8	-1.94851	52.36	33.33	1267.15	C147H234N29O81S3	1	84.22	02_RE_Liver_human_15ug_TR2_240613_f		1267.15	3797.42	1267.15	1	7.41	01Y41Y41M(31M21M21M31G31G)61M(31M)61M	333.96	23	73.33
P11279_GHTLTLNFTR_7_HexNAc(2)Hex(4)	23689	P11279	GHTLTLNFTR	N7GlcNAc	3	N2H4F0S0	22	N,5;	5	103	7	-0.54155	50.92	16.17	738.669	C91H149N18O45	1	113.12	18_adg_human_15ug_TR3_240615_f	01AII2,BI1,BII1,BII2,BI2,03AI2,14AII2,BII2,BI2,YI2,15AI2,02XI1,35XI1,ZI1,YI1,03XI2,ZI2,YI2,YII3,YI3,YII4,02XI1,ZI1,YI1,YI2,	739.003	2213.99	739.004	1	0	01Y41Y41M(31M21M)61M	333.94	21	100
Q13683_KNITLDCAR_2_HexNAc(3)Hex(4)NeuAc(1)	14825	Q13683	KNITLDCAR	N2GlcNAcC7Cam	3	N3H4F0S1	26	N,2;	2	989	2	1.78041	56.54	24.23	880.712	C103H176N19O58S1	1	67.87	17_Prostate_human_15ug_TR2_240619_f	02AI2,01AII1,BI2,BII1,BI1,CI1,35AI4,BI2,35AI3,02XI1,35XI1,ZI1,YI1,BI3,02XI2,ZI2,YI2,YI3,YI4,YI5,YI6,ZI1,YI1,YI2,YI3,YI4,	880.712	2639.11	880.71	1	0	01Y41Y41M(31M)61M61Y41L32S	333.92	19	100
P02787_QQQHLFGSNVTDCSGNFCLFR_9_HexNAc(4)Hex(5)Fuc(2)NeuAc(1)	34027	P02787	QQQHLFGSNVTDCSGNFCLFR	N9GlcNAcC13CamC18Cam	4	N4H5F2S1	0	N,2;	2	630	9	-3.65917	39.21	24.22	1181.23	C192H299N38O95S2	1	161.18	20_Oesophagus_human_15ug_TR1_240618_f		1181.48	4720.92	1181.49	2	8.09	01Y41Y41M(31M)61M(21Y(31F)41L32S)61Y(31F)41L	333.73	28	65
Q08431_FELLGCELNGCANPLGLK_9_HexNAc(2)Hex(9)	15944	Q08431	FELLGCELNGCANPLGLK	C6CamN9GlcNAcC11Cam	4	N2H9F0S0	0	N,0;	0	228	9	9.03599	35.45	15.94	968.421	C157H258N25O82S2	1	75.96	02_RE_Liver_human_15ug_TR3_240613_f		968.672	3869.62	968.663	1	4.81	01Y41Y41M(31M21M21M31G31G)61M(31M)61M	333.47	6	14.71
P29622_TTPKDFYVDENTTVR_11_HexNAc(5)Hex(3)	14996	P29622	TTPKDFYVDENTTVR	N11GlcNAc	4	N5H3F0S0	0	N,1;	1	238	11	3.42709	38.15	20.25	822.865	C136H216N25O68	1	73.96	15_bigintes_human_15ug_TR3_240616_f		822.865	3287.42	822.862	1	25.98	01Y41Y41M(31M41Y)61M(21Y)61Y	333.43	6	14.29
P34059_QGIDFCPGQNVSGVTTHNLEDHTK_10_HexNAc(2)Hex(8)	23693	P34059	QGIDFCPGQNVSGVTTHNLEDHTK	C6CamN10GlcNAc	4	N2H8F0S0	1	N,1;	1	423	10	1.47775	37.43	16.18	1090.46	C175H279N36O90S1	1	113.16	18_adg_human_15ug_TR1_240615_f	04AI3,	1090.46	4356.81	1090.46	1	4.48	01Y41Y41M(31M21M21M)61M(31M21M)61M	333.38	22	47.83
Q8IZT6_KNSSISIPFIPETPVR_2_HexNAc(2)Hex(7)	37268	Q8IZT6	KNSSISIPFIPETPVR	N2GlcNAc	3	N2H7F0S0	3	N,1;	1	3424	2	0.431292	35.63	11.8	1109.51	C139H230N23O69	2	179.65	04_Stomach_human_15ug_TR1_240614_f	45AI3,YI3,YI3,	1109.51	3325.52	1109.51	1	6.76	01Y41Y41M(31M)61M(31M21M)61M21M	333.37	8	20
Q13009_AGDEILEINNRAADALNSSMLK_17_HexNAc(2)Hex(6)	32854	Q13009	AGDEILEINNRAADALNSSMLK	N17GlcNAc	3	N2H6F0S0	5	N,0;	0	907	17	7.00999	25.84	12.75	1242.9	C149H252N31O76S1	1	157.63	10_Fat_human_15ug_TR3_231011_f	BI2,BI2,YI3,ZI3,YI3,	1242.57	3723.65	1242.56	1	7.04	01Y41Y41M(31M21M)61M(31M)61M	333.12	8	19.05
Q05707_SFMVNWTHAPGNVEK_5_HexNAc(4)Hex(5)NeuAc(2)	28229	Q05707	SFMVNWTHAPGNVEK	N5GlcNAc	3	N4H5F0S2	0	N,4;	4	372	5	1.53247	37.72	25.19	1308.54	C161H250N27O83S1	1	134.47	19_Ovarian_human_15ug_TR2_240617_f		1308.54	3921.59	1308.54	1	10.28	01Y41Y41M(31M)61M(21Y41L32S)61Y41L32S	333.03	24	78.57
Q7Z3B1_GAWLNR_5_HexNAc(2)Hex(6)	15683	Q7Z3B1	GAWLNR	N5GlcNAc	2	N2H6F0S0	4	N,3;	3	73	5	-0.771682	62.29	13.74	1048.43	C84H136N13O48	1	79.84	human_brain_14ug_TR3_0703_f	BI2,ZI3,YI3,YI3,	1047.93	2094.86	1047.93	1	2.36	01Y41Y41M(31M21M)61M(31M)61M	332.9	12	100
P25054_YAGMALTNLTFGDVANK_8_HexNAc(4)Hex(3)	17961	P25054	YAGMALTNLTFGDVANK	N8GlcNAc	3	N4H3F0S0	0	N,1;	1	507	8	-2.24135	44.99	12.58	1029.12	C129H207N24O60S1	1	87.91	10_Fat_human_15ug_TR2_231011_f		1029.12	3084.36	1029.13	1	74.99	01Y41Y41M(31M41Y)61M61Y	332.58	7	18.75
Q5T7N2_FWNSSDK_3_HexNAc(2)Hex(6)	11419	Q5T7N2	FWNSSDK	N3GlcNAc	2	N2H6F0S0	4	N,1;	1	766	3	3.8759	75.85	22.89	1131.95	C92H141N12O53	1	53.07	16_Pancreas_human_15ug_TR3_240614_f	BI2,ZI3,YI3,YI3,	1131.94	2261.87	1131.94	1	12.56	01Y41Y41M(31M)61M(31M21M)61M	332.43	7	33.33
P21810_LLQVVYLHSNNITK_11_HexNAc(5)Hex(4)Fuc(1)NeuAc(1)	27017	P21810	LLQVVYLHSNNITK	N11GlcNAc	3	N5H4F1S1	0	N,7;	7	311	11	2.16663	47.78	18.6	1248.57	C156H257N26O78	1	137.51	12_Tetis_human_8ug_TR2_231109_f		1248.91	3742.69	1248.91	1	4.21	01Y41Y41M(31M41Y)61M(21Y41L32S)61Y31F	331.92	29	103.85
P16870_GNETIVNLIHSTR_2_HexNAc(2)Hex(5)	23457	P16870	GNETIVNLIHSTR	N2GlcNAc	3	N2H5F0S0	15	N,6;	6	139	2	-2.10012	55.63	23.16	891.07	C107H181N22O56	1	117.62	human_brain_14ug_TR2_0703_f	BI1,BII1,BIII1,BI2,35AI2,02AI3,02AI2,YI1,YI2,02XI1,ZI1,YI1,YI2,YI3,YI4,YII4,YIII3,02XI1,YI1,	891.071	2670.2	891.072	1	0	01Y41Y41M(31M)61M(31M)61M	331.83	24	91.67
Q96FC7_NLSLEAIQLCDR_1_HexNAc(2)Hex(9)	17686	Q96FC7	NLSLEAIQLCDR	N1GlcNAcC10Cam	3	N2H9F0S0	0	N,3;	3	23	1	-0.672556	45.56	16.14	1099.79	C129H219N20O76S1	1	84.69	02_RE_Liver_human_15ug_TR3_240613_f		1099.79	3296.36	1099.79	1	14.14	01Y41Y41M(31M21M21M)61M(31M21M)61M21M	331.75	8	22.73
P35442_VVNSTTGTGEHLR_3_HexNAc(4)Hex(5)NeuAc(1)	11493	P35442	VVNSTTGTGEHLR	N3GlcNAc	3	N4H5F0S1	2	N,1;	1	1069	3	1.4376	57.06	35.62	1095.8	C129H215N24O74	1	53.27	19_Ovarian_human_15ug_TR3_240617_f	YI3,YI3,	1095.8	3284.38	1095.8	1	1.7	01Y41Y41M(31M)61M(21Y41L32S)61Y41L	331.67	18	66.67
Q10588_DSSGVIHVMLNGSEPTGAYPIK_11_HexNAc(2)Hex(7)	28760	Q10588	DSSGVIHVMLNGSEPTGAYPIK	N11GlcNAc	3	N2H7F0S0	3	N,15;	15	192	11	-1.57916	42.1	24.42	1272.22	C157H255N28O78S1	1	137.44	19_Ovarian_human_15ug_TR3_240617_f	04AI4,YI3,YI3,	1272.22	3812.66	1272.23	1	2.2	01Y41Y41M(31M)61M(31M21M)61M21M	331.51	32	73.81
P24821_GPNCSEPECPGNCHLR_3_HexNAc(4)Hex(5)Fuc(1)NeuAc(1)	12793	P24821	GPNCSEPECPGNCHLR	N3GlcNAcC4CamC9CamC13Cam	3	N4H5F1S1	1	N,2;	2	184	3	0.886377	38.68	25.81	1315.5	C152H244N31O84S3	1	63.59	15_bigintes_human_15ug_TR3_240616_f	03AI5,	1315.84	3943.49	1315.84	2	7.2	01Y41Y41M(31M41Y41L)61M21Y(31F)41L32S	331.44	23	73.33
P14415_FHVNYTQPLVAVK_4_HexNAc(2)Hex(5)	23834	P14415	FHVNYTQPLVAVK	N4GlcNAc	3	N2H5F0S0	12	N,14;	14	238	4	-4.27279	46.21	19.36	912.091	C118H187N20O53	1	119.48	human_brain_14ug_TR2_0703_f	BI1,BII1,BIII1,BI2,03AI2,CI2,YI2,02XI1,ZI1,YI1,YI2,YI3,YI4,YII4,YIII3,YI1,	911.754	2732.26	911.758	1	0	01Y41Y41M(31M)61M(31M)61M	331.18	28	112.5
P78504_RDGNSSLIAAVAEVR_4_HexNAc(2)Hex(6)	25121	P78504	RDGNSSLIAAVAEVR	N4GlcNAc	3	N2H6F0S0	6	N,1;	1	1045	4	7.1814	37.98	16.37	979.784	C116H199N24O63	1	121.58	02_RE_Liver_human_15ug_TR3_240613_f	BI2,BI2,ZI3,YI3,ZI3,YI3,	979.783	2936.31	979.776	1	23.58	01Y41Y41M(31M)61M(31M21M)61M	331.16	10	28.57
P02751_DQCIVDDITYNVNDTFHK_13_HexNAc(4)Hex(5)Fuc(1)NeuAc(1)	31517	P02751	DQCIVDDITYNVNDTFHK	C3CamN13GlcNAc	3	N4H5F1S1	0	N,9;	9	528	13	1.30802	39.58	20.16	1420.58	C173H271N30O91S1	1	148.93	17_Prostate_human_15ug_TR2_240619_f		1420.25	4256.72	1420.25	1	9.61	01Y(61F)41Y41M(31M41Y41L)61M61Y41L32S	331.14	32	88.24
Q99538_SHTNTSHVMQYGNK_4_HexNAc(3)Hex(4)	11001	Q99538	SHTNTSHVMQYGNK	N4GlcNAc	3	N3H4F0S0	0	N,8;	8	263	4	0.0583402	53.23	33.6	954.732	C114H182N25O58S1	1	51.21	02_RE_Liver_human_15ug_TR1_240613_f		954.732	2861.18	954.732	1	6.71	01Y41Y41M(31M)(41Y)61M61M	330.88	28	103.85
Q07954_LYWISSGNHTINR_12_HexNAc(2)Hex(6)	22511	Q07954	LYWISSGNHTINR	N12GlcNAc	3	N2H6F0S0	3	N,1;	1	1767	12	-1.07434	50.22	17.59	980.762	C122H192N23O60	1	111.91	human_brain_14ug_TR3_0703_f	BI2,YI3,YI3,	980.761	2939.27	980.762	1	14.06	01Y41Y41M(31M)61M(31M21M)61M	330.84	23	83.33
P05556_CHEGNGTFECGACR_5_HexNAc(2)Hex(9)	11243	P05556	CHEGNGTFECGACR	C1CamN5GlcNAcC10CamC13Cam	3	N2H9F0S0	0	N,6;	6	481	5	0.555231	53.96	35.09	1174.42	C133H212N25O79S3	1	52.23	18_adg_human_15ug_TR3_240615_f		1174.09	3519.25	1174.09	1	2.39	01Y41Y41M(31M21M21M31G)61M(31M21M)61M	330.83	24	88.46
P00738_VVLHPNYSQVDIGLIK_6_HexNAc(5)Hex(6)NeuAc(1)	30828	P00738	VVLHPNYSQVDIGLIK	N6GlcNAc	3	N5H6F0S1	2	N,5;	5	241	6	1.65013	60.99	31.1	1359.28	C170H278N27O86	1	145.06	20_Oesophagus_human_15ug_TR3_240618_f	YI3,YI3,	1359.28	4073.82	1359.28	1	3.78	01Y41Y41M(31M)61M(21Y41L31Y41L32S)61Y41L	330.81	22	70
Q5JQC9_GEKINASTDSLAK_5_HexNAc(2)Hex(6)	17156	Q5JQC9	GEKINASTDSLAK	N5GlcNAc	2	N2H6F0S0	5	N,0;	0	534	5	1.07684	44.52	13.56	1357.09	C107H183N18O62	1	81.41	16_Pancreas_human_15ug_TR1_240614_f	BI2,CI2,ZI3,YI3,YI3,	1357.09	2712.17	1357.09	1	9.46	01Y41Y41M(31M21M)61M(31M)61M	330.69	9	25
Q9Y2G4_EKALNSTATQR_5_HexNAc(3)Hex(6)NeuAc(1)	12680	Q9Y2G4	EKALNSTATQR	N5GlcNAc	3	N3H6F0S1	13	N,0;	0	567	5	7.21455	53.13	23.39	1031.45	C120H204N21O72	1	57.26	17_Prostate_human_15ug_TR2_240619_f	02AIII2,BIII2,BIII1,CIII1,35AIII4,BIII2,35AIII3,BIII3,35AIII4,YIII5,YIII6,YIII5,YIII6,	1031.45	3091.29	1031.44	1	59.36	01Y41Y41M(31M41Y41L32S)61M(31M)61M	330.63	8	30
P02751_RHEEGHMLNCTCFGQGR_9_HexNAc(4)Hex(5)NeuAc(2)	18445	P02751	RHEEGHMLNCTCFGQGR	N9GlcNAcC10CamC12Cam	4	N4H5F0S2	0	N,0;	0	542	9	-0.134401	40.31	29.19	1074.67	C167H266N37O88S3	1	87.45	18_adg_human_15ug_TR3_240615_f		1074.67	4293.66	1074.67	1	43.85	01Y41Y41M(31M)61M(21Y41L32S)61Y41L32S	330.45	15	46.88
Q9NQ38_SNGTGSESGKDTCDEFR_2_HexNAc(6)Hex(3)Fuc(3)	12418	Q9NQ38	SNGTGSESGKDTCDEFR	N2GlcNAcC13Cam	3	N6H3F3S0	0	N,2;	2	763	2	1.44425	67.18	27.01	1331.19	C155H250N29O90S1	1	57.72	20_Oesophagus_human_15ug_TR1_240618_f		1331.2	3989.56	1331.19	1	19.8	01Y41Y41M(31M(21Y31F)41Y31F)61M(21Y31F)61Y	330.07	23	62.5
Q9BTY2_SQNDTVTPDVWYTSKPK_3_HexNAc(2)Hex(6)	22128	Q9BTY2	SQNDTVTPDVWYTSKPK	N3GlcNAc	3	N2H6F0S0	5	N,4;	4	377	3	-0.0185332	40.57	17.39	1115.82	C139H219N24O70	2	105.64	18_adg_human_15ug_TR3_240615_f	BI2,CI2,BI2,YI3,YI3,	1115.82	3344.43	1115.82	1	0	01Y41Y41M(31M21M)61M(31M)61M	329.97	27	81.25
O75626_SNISPLTSEKDLDDFR_2_HexNAc(3)Hex(5)	26969	O75626	SNISPLTSEKDLDDFR	N2GlcNAc	3	N3H5F0S0	0	N,1;	1	270	2	1.91124	39.28	12.4	1086.48	C132H215N24O70	1	130.81	02_RE_Liver_human_15ug_TR3_240613_f		1086.47	3256.4	1086.47	1	20.72	01Y41Y41M(31M)(41Y)61M31M21M	329.84	7	20
P02749_LGNWSAMPSCK_3_HexNAc(4)Hex(5)NeuAc(1)	23243	P02749	LGNWSAMPSCK	N3GlcNAcC10Cam	3	N4H5F0S1	3	N,3;	3	253	3	2.07666	50.29	25.59	1055.76	C126H203N20O69S2	1	108.92	17_Prostate_human_15ug_TR2_240619_f	15AII3,CII3,35AI5,	1055.76	3164.24	1055.75	1	9.88	01Y41Y41M(31M41Y41L)61M61Y41L32S	329.75	23	100
P11047_VNNTLSSQISR_2_HexNAc(4)Hex(3)	15117	P11047	VNNTLSSQISR	N2GlcNAc	2	N4H3F0S0	0	N,4;	4	1107	2	3.83494	66.49	18.8	1259.57	C99H170N21O54	1	70.04	15_bigintes_human_15ug_TR1_240616_f		1259.57	2517.12	1259.57	1	32.34	01Y41Y41M(31M41Y)61M61Y	329.7	20	85
P56199_SQNDKFNVSLTVK_7_HexNAc(3)Hex(5)	23680	P56199	SQNDKFNVSLTVK	N7GlcNAc	3	N3H5F0S0	3	N,8;	8	840	7	1.01752	47.9	19.39	967.435	C118H196N21O62	1	111.37	17_Prostate_human_15ug_TR3_240619_f	BIII1,CIII1,YIII4,	967.435	2899.28	967.434	2	30.35	01Y41Y41M(31M41Y)61M(31M)61M	329.43	25	95.83
Q9H201_SRGSPSSYNSSSSSPR_9_HexNAc(5)Hex(5)Fuc(1)NeuAc(1)	15166	Q9H201	SRGSPSSYNSSSSSPR	N9GlcNAc	3	N5H5F1S1	0	N,1;	1	187	9	4.19344	50.59	20.65	1302.86	C151H246N29O90	1	71.48	19_Ovarian_human_15ug_TR3_240617_f		1302.86	3905.56	1302.86	1	4.5	01Y41Y41M(31M41Y)61M61Y(31F)41L31Y41L32S	329.39	7	16.67
P02751_GGNSNGALCHFPFLYNNHNYTDCTSEGR_19_HexNAc(4)Hex(5)Fuc(1)	30904	P02751	GGNSNGALCHFPFLYNNHNYTDCTSEGR	C9CamN19GlcNAcC23Cam	4	N4H5F1S0	0	N,2;	2	430	19	2.27342	36.75	25	1244.26	C203H305N46O95S2	1	146.22	17_Prostate_human_15ug_TR3_240619_f		1244.01	4970.99	1244	1	3.41	01Y41Y41M(31M41Y(31F)41L)61M61Y41L	329.25	17	31.48
P12109_NVTAQICIDK_1_HexNAc(3)Hex(4)	20202	P12109	NVTAQICIDK	N1GlcNAcC7Cam	2	N3H4F0S0	4	N,5;	5	804	1	1.39392	38.66	16.62	1210.53	C96H164N17O52S1	1	94.11	21_Bladder_human_15ug_TR3_240619_f	BI3,CI3,YI3,YI3,	1210.53	2419.04	1210.53	1	19.39	01Y41Y41M(31M)61M61Y41L	329.12	25	122.22
Q4KMQ2_LNITCESSK_2_HexNAc(2)Hex(7)	13552	Q4KMQ2	LNITCESSK	N2GlcNAcC5Cam	2	N2H7F0S0	4	N,4;	4	361	2	1.62227	68.31	25.36	1297.03	C100H171N14O62S1	1	63.23	19_Ovarian_human_15ug_TR2_240617_f	BI2,BI2,YI3,YI3,	1297.03	2592.04	1297.02	1	7.3	01Y41Y41M(31M21M)61M(31M21M)61M	328.82	23	125
P07339_GSLSYLNVTR_7_HexNAc(2)Hex(3)Fuc(1)	22580	P07339	GSLSYLNVTR	N7GlcNAc	2	N2H3F1S0	15	N,12;	12	263	7	1.13789	34.32	13.68	1074.99	C88H147N16O45	1	107.77	18_adg_human_15ug_TR1_240615_f	03AI2,BI1,BII1,03AI2,CI2,34AI3,BI3,CI3,YI1,YI2,YI3,YII3,02XI1,ZI1,YI1,25XI2,YI2,	1074.99	2147.97	1074.99	1	0	01Y(61F)41Y41M(31M)61M	328.68	26	127.78
P11717_MNFTGGDTCHK_2_HexNAc(2)Hex(8)	15362	P11717	MNFTGGDTCHK	N2GlcNAcC9Cam	3	N2H8F0S0	4	N,4;	4	1312	2	2.8713	48.32	23.04	991.042	C115H185N18O68S2	1	79.78	12_Tetis_human_8ug_TR2_231109_f	25AI3,35AI3,ZI3,YI3,	991.043	2970.1	991.04	1	9.61	01Y41Y41M(31M21M)61M(31M21M)61M21M	328.68	23	100
P16444_ANLTTLAGTHTNIPK_2_HexNAc(4)Hex(5)Fuc(1)NeuAc(2)	24211	P16444	ANLTTLAGTHTNIPK	N2GlcNAc	3	N4H5F1S2	0	N,6;	6	57	2	3.09614	31.59	18.38	1302.24	C157H261N26O87	1	123.37	12_Tetis_human_8ug_TR3_231109_f		1302.24	3902.68	1302.23	1	17.78	01Y(61F)41Y41M(31M41Y41L32S)61M61Y41L32S	328.51	29	96.43
P00734_SRYPHKPEINSTTHPGADLQENFCR_22_HexNAc(4)Hex(5)NeuAc(2)	21071	P00734	SRYPHKPEINSTTHPGADLQENFCR	N22GlcNAcC24Cam	5	N4H5F0S2	0	N,1;	1	155	22	0.0084172	33.62	17.08	1033.04	C210H329N46O102S1	1	100.5	18_adg_human_15ug_TR1_240615_f		1033.04	5159.17	1033.04	1	16.9	01Y41Y41M(31M)61M(21Y41L32S)61Y41L32S	328.5	15	31.25
Q6UWY5_NNTVWEFANIR_1_HexNAc(2)Hex(5)	30916	Q6UWY5	NNTVWEFANIR	N1GlcNAc	2	N2H5F0S0	17	N,3;	3	183	1	2.11066	50.49	17.84	1291.06	C107H167N20O53	1	146.74	19_Ovarian_human_15ug_TR1_240617_f	03AI2,BI1,BII1,BIII1,CI1,CII1,CIII1,03AI2,CI2,BI2,ZI1,YI1,ZI2,YI2,BI4,YI3,YI4,YII4,YIII3,02XI1,ZI1,YI1,YI2,	1291.06	2580.1	1291.05	1	0	01Y41Y41M(31M)61M(31M)61M	328.33	23	95
P01861_EEQFNSTYR_5_HexNAc(4)Hex(5)Fuc(1)	14972	P01861	EEQFNSTYR	N5GlcNAc	2	N4H5F1S0	0	N,1;	1	177	5	2.13511	40.9	32.61	1472.09	C118H185N18O68	1	69.41	21_Bladder_human_15ug_TR2_240619_f		1472.09	2942.16	1472.08	2	3.72	01Y41Y41M(31M41Y(31F)41L)61M61Y41L	328.17	13	56.25
Q8TEJ3_IGIFPLLYVELNDSAK_12_HexNAc(2)Hex(5)	30102	Q8TEJ3	IGIFPLLYVELNDSAK	N12GlcNAc	3	N2H5F0S0	15	N,1;	1	317	12	5.59362	35.7	10.05	1003.82	C131H211N20O59	1	151.14	human_brain_14ug_TR1_0703_f_28802-	BI1,BII1,BIII1,BI2,YI1,YI2,YI3,02XI1,ZI1,YI1,BI4,ZI2,YI2,YI3,YI4,YII4,YIII3,ZI1,YI1,	1003.82	3008.41	1003.81	1	0	01Y41Y41M(31M)61M(31M)61M	327.78	8	20
P05783_IVDGKVVSETNDTK_11_HexNAc(4)Hex(3)	11571	P05783	IVDGKVVSETNDTK	N11GlcNAc	3	N4H3F0S0	0	N,2;	2	423	11	0.168744	52.75	21.11	935.427	C113H192N21O60	1	54.16	02_RE_Liver_human_15ug_TR2_240613_f		935.427	2803.26	935.427	1	41.52	01Y41Y41M(31M41Y)61M61Y	327.62	10	26.92
P12110_HAELSFVFLTDGVTGNDSLHESAHSMR_16_HexNAc(4)Hex(5)Fuc(1)NeuAc(2)	35467	P12110	HAELSFVFLTDGVTGNDSLHESAHSMR	N16GlcNAc	4	N4H5F1S2	2	N,1;	1	954	16	2.55371	36.48	19.86	1328.32	C217H340N43O108S1	1	169.66	21_Bladder_human_15ug_TR2_240619_f	YI3,YI3,	1328.31	5308.22	1328.31	1	10.42	01Y41Y41M(31M)61M(21Y(31F)41L32S)61Y41L32S	327.59	23	44.23
P07585_LGLSFNSISAVDNGSLANTPHLR_13_HexNAc(5)Hex(4)Fuc(2)	32492	P07585	LGLSFNSISAVDNGSLANTPHLR	N13GlcNAc	3	N5H4F2S0	0	N,4;	4	262	13	1.08758	43.15	21.47	1447.33	C179H293N36O87	1	154.65	19_Ovarian_human_15ug_TR1_240617_f		1447.66	4338.96	1447.66	2	2.13	01Y41Y41M(31M41Y(31F)41L31Y)61M61Y31F	327.58	32	70.45
P08648_LSPIHIALNFSLDPQAPVDSHGLRPALHYQSK_9_HexNAc(2)Hex(7)	32506	P08648	LSPIHIALNFSLDPQAPVDSHGLRPALHYQSK	N9GlcNAc	5	N2H7F0S0	5	N,4;	4	609	9	-1.94429	26.66	13.63	1013.68	C218H346N47O90	1	156.62	15_bigintes_human_15ug_TR2_240616_f	BI3,CI3,YI3,YI3,YI3,	1013.68	5062.39	1013.69	1	2.27	01Y41Y41M(31M)61M(31M21M)61M21M	327.2	23	37.1
Q658P3_QVLANKSHLWVEEEVWR_5_HexNAc(4)Hex(5)NeuAc(1)	35327	Q658P3	QVLANKSHLWVEEEVWR	N5GlcNAc	4	N4H5F0S1	2	N,1;	1	344	5	-8.24205	36.71	11.65	1010.44	C170H267N32O80	1	165.29	15_bigintes_human_15ug_TR1_240616_f	YI3,YI3,	1010.44	4036.78	1010.45	2	4.38	01Y41Y41M(31M)61M(21Y41L32S)61Y41L	327.04	8	18.75
P14625_EEEAIQLDGLNASQIR_11_HexNAc(2)Hex(5)	27130	P14625	EEEAIQLDGLNASQIR	N11GlcNAc	3	N2H5F0S0	12	N,8;	8	62	11	0.0311009	42.14	18.99	1001.78	C120H201N24O64	1	131.28	16_Pancreas_human_15ug_TR3_240614_f	BI1,BII1,BIII1,BI2,35AI4,15AI2,YI2,02XI1,ZI1,YI1,YI2,YI3,ZI1,YI1,	1001.78	3002.32	1001.78	1	0	01Y41Y41M(31M)61M(31M)61M	326.81	31	96.67
Q92542_NISGVVLADHSGAFHNK_1_HexNAc(2)Hex(8)	22722	Q92542	NISGVVLADHSGAFHNK	N1GlcNAc	4	N2H8F0S0	2	N,8;	8	435	1	3.58777	36.03	18.53	868.379	C141H227N26O74	1	116.41	12_Tetis_human_8ug_TR2_231109_f	03AI4,YI3,	868.13	3468.48	868.126	1	5.96	01Y41Y41M(31M21M)61M(31M21M)61M21M	326.63	33	103.13
Q14112_IHQNITYQVCR_4_HexNAc(4)Hex(4)Fuc(1)	18448	Q14112	IHQNITYQVCR	N4GlcNAcC10Cam	3	N4H4F1S0	0	N,2;	2	703	4	-0.266755	41.76	16.12	1013.77	C123H201N24O62S1	1	90.12	10_Fat_human_15ug_TR2_231011_f		1013.77	3038.3	1013.77	1	1.08	01Y41Y41M(31M41Y(31F)41L)61M61Y	326.49	17	75
P42694_NGKSDTNNSGPEINK_7_HexNAc(2)Hex(5)	20696	P42694	NGKSDTNNSGPEINK	N7GlcNAc	3	N2H5F0S0	16	N,2;	2	1285	7	0.0429128	34.47	12.82	931.394	C108H180N23O62	1	104.16	human_brain_14ug_TR2_0703_f	BI1,BII1,BIII1,BI2,YI2,YI3,02XI1,ZI1,YI1,ZI2,YI2,ZI3,YI3,YI4,YII4,YIII3,02XI1,ZI1,YI1,YI2,	931.394	2791.16	931.394	1	0	01Y41Y41M(31M)61M(31M)61M	326.35	10	28.57
P51888_NSFNISNLLVLHLSHNR_4_HexNAc(4)Hex(5)NeuAc(2)	38688	P51888	NSFNISNLLVLHLSHNR	N4GlcNAc	3	N4H5F0S2	0	N,1;	1	289	4	1.02185	47.54	21.04	1395.62	C171H277N34O86	1	183.17	17_Prostate_human_15ug_TR1_240619_f		1395.62	4182.83	1395.62	1	15.97	01Y41Y41M(31M41Y41L32S)61M61Y41L32S	326.33	23	65.63
Q05586_VICTGPNDTSPGSPR_7_HexNAc(2)Hex(5)	13233	Q05586	VICTGPNDTSPGSPR	C3CamN7GlcNAc	2	N2H5F0S0	15	N,4;	4	440	7	-0.0894669	66.41	27.4	1388.08	C109H181N22O59S1	1	70.17	human_brain_14ug_TR1_0703_f_new	BI1,BII1,BIII1,BI2,ZI1,YI1,ZI2,YI2,BI4,ZI3,YI3,YI4,YII4,YIII3,MH,02XI1,ZI1,YI1,YI2,	1388.08	2774.16	1388.08	1	0	01Y41Y41M(31M)61M(31M)61M	326.32	26	82.14
O43167_SHTGERPFKCNECGK_11_HexNAc(3)Hex(4)	10936	O43167	SHTGERPFKCNECGK	C10CamN11GlcNAcC13Cam	3	N3H4F0S0	0	N,0;	0	325	11	1.94713	26.43	20.36	1022.42	C121H195N28O60S2	1	50.88	02_RE_Liver_human_15ug_TR1_240613_f		1022.42	3064.25	1022.42	1	1.34	01Y41Y41M(31M)(41Y)61M61M	326.24	7	21.43
P07585_IADTNITSIPQGLPPSLTELHLDGNK_5_HexNAc(4)Hex(4)	34302	P07585	IADTNITSIPQGLPPSLTELHLDGNK	N5GlcNAc	3	N4H4F0S0	4	N,4;	4	211	5	0.232059	40.65	18.98	1403.33	C176H291N36O81	1	161.66	17_Prostate_human_15ug_TR1_240619_f	BI2,BI2,YI3,YI3,	1403	4204.98	1403	2	19.75	01Y41Y41M(31M)61M(21Y41L)61Y	326.12	33	64
P07585_LGLSFNSISAVDNGSLANTPHLR_13_HexNAc(5)Hex(4)Fuc(1)NeuAc(1)	32828	P07585	LGLSFNSISAVDNGSLANTPHLR	N13GlcNAc	3	N5H4F1S1	0	N,4;	4	262	13	2.02438	49.89	21	1496.01	C184H300N37O91	1	157.32	19_Ovarian_human_15ug_TR2_240617_f		1496.01	4484	1496.01	2	1.9	01Y41Y41M(31M41Y)61M(21Y41L32S)61Y31F	325.72	32	70.45
P16444_ANLSQVADHLDHIK_2_HexNAc(3)Hex(6)	27067	P16444	ANLSQVADHLDHIK	N2GlcNAc	4	N3H6F0S0	20	N,7;	7	279	2	0.493293	36.68	17.49	786.599	C127H209N24O67	1	137.4	12_Tetis_human_8ug_TR3_231109_f	35AI3,BI1,BII1,BIII1,BI2,03AI2,03AIII2,CI2,25AIII2,04AI3,BIII2,CIII2,BIII3,YI1,YI2,02XI1,ZI1,YI1,ZI2,YI2,YIII3,ZI1,YI1,	786.599	3142.37	786.599	1	0	01Y41Y41M(31M41Y41L)61M(31M)61M	325.4	28	100
P42765_KDGTVTAGNASGVADGAGAVIIASEDAVK_9_HexNAc(2)Hex(9)	28949	P42765	KDGTVTAGNASGVADGAGAVIIASEDAVK	N9GlcNAc	3	N2H9F0S0	0	N,1;	1	249	9	-9.22359	30.99	15.19	1504.66	C180H303N34O98	1	136.67	20_Oesophagus_human_15ug_TR1_240618_f		1504.32	4508.98	1504.33	1	4.77	01Y41Y41M(31M21M21M31G31G)61M(31M)61M	325.35	7	12.5
Q709C8_NITTVLQPCSLFMEK_1_HexNAc(4)Hex(5)NeuAc(1)	37447	Q709C8	NITTVLQPCSLFMEK	N1GlcNAcC9Cam	3	N4H5F0S1	2	N,1;	1	2169	1	5.44599	48.67	18.59	1232.54	C151H249N24O77S2	1	185.19	11_Spleen_human_15ug_TR3_231108_f_24580-	03AI5,35AI5,	1232.87	3694.57	1232.87	1	11.72	01Y41Y41M(31M41Y41L)61M61Y41L32S	325.3	10	25
O76090_KTVEFNLTDMPEIPENHLK_6_HexNAc(2)Hex(6)	29293	O76090	KTVEFNLTDMPEIPENHLK	N6GlcNAc	3	N2H6F0S0	4	N,1;	1	540	6	8.78812	28.04	11.07	1212.22	C152H246N27O72S1	2	138.81	21_Bladder_human_15ug_TR2_240619_f	BI2,BI2,YI3,YI3,	1212.56	3633.61	1212.54	1	0	01Y41Y41M(31M21M)61M(31M)61M	325.25	9	25
P02749_LGNWSAMPSCK_3_HexNAc(4)Hex(5)NeuAc(2)	23686	P02749	LGNWSAMPSCK	N3GlcNAcC10Cam	3	N4H5F0S2	0	N,5;	5	253	3	2.5809	44.27	20.4	1152.79	C137H220N21O77S2	1	111.47	21_Bladder_human_15ug_TR2_240619_f		1152.79	3455.34	1152.79	2	19.98	01Y41Y41M(31M)61M(21Y41L32S)61Y41L32S	325.19	26	115
P07585_IADTNITSIPQGLPPSLTELHLDGNK_5_HexNAc(3)Hex(5)NeuAc(1)	33629	P07585	IADTNITSIPQGLPPSLTELHLDGNK	N5GlcNAc	3	N3H5F0S1	11	N,5;	5	211	5	2.94421	43.37	23.71	1486.36	C185H305N36O89	1	161.28	19_Ovarian_human_15ug_TR2_240617_f	02AII2,BII2,BII1,CII1,35AII4,BII2,35AII3,BII3,35AII4,YII5,YII6,	1486.36	4455.04	1486.36	1	32.85	01Y41Y41M(31M41Y41L32S)61M61M	325.13	36	70
Q16853_YLYLASNHSNK_7_HexNAc(4)Hex(5)Fuc(2)NeuAc(1)	14674	Q16853	YLYLASNHSNK	N7GlcNAc	3	N4H5F2S1	0	N,4;	4	592	7	0.368815	33.94	17.65	1173.16	C144H228N21O79	1	72.53	15_bigintes_human_15ug_TR2_240616_f		1172.82	3515.45	1172.82	1	0.6	01Y41Y41M(31M41Y(31F)41L)61M21Y(31F)41L32S	325.1	24	100
P21810_MIENGSLSFLPTLR_4_HexNAc(4)Hex(5)Fuc(1)	34562	P21810	MIENGSLSFLPTLR	N4GlcNAc	3	N4H5F1S0	0	N,2;	2	270	4	1.07704	32.74	26.27	1116.5	C138H229N22O70S1	1	163.91	17_Prostate_human_15ug_TR2_240619_f		1116.5	3346.48	1116.5	2	2.3	01Y41Y41M(31M41Y(31F)41L)61M61Y41L	324.9	24	80.77
P51888_NSFNISNLLVLHLSHNR_4_HexNAc(5)Hex(4)	35874	P51888	NSFNISNLLVLHLSHNR	N4GlcNAc	4	N5H4F0S0	0	N,1;	1	289	4	1.12885	61.91	21.24	911.926	C151H246N33O70	1	171.52	19_Ovarian_human_15ug_TR1_240617_f		911.425	3641.67	911.424	1	20.04	01Y41Y41M(31M41Y41L31Y)61M61Y	324.83	23	65.63
P51884_KLHINHNNLTESVGPLPK_8_HexNAc(5)Hex(4)Fuc(1)	22860	P51884	KLHINHNNLTESVGPLPK	N8GlcNAc	4	N5H4F1S0	0	N,0;	0	127	8	2.6046	44.42	21.47	956.453	C159H263N32O75	1	116.94	12_Tetis_human_8ug_TR1_231109_f		956.453	3820.77	956.451	2	7.49	01Y41Y41M(31M41Y41L31Y)61M61Y31F	324.58	15	41.18
P01857_EEQYNSTYR_5_HexNAc(4)Hex(5)Fuc(1)	12025	P01857	EEQYNSTYR	N5GlcNAc	2	N4H5F1S0	1	N,1;	1	180	5	-2.01471	40.54	33.41	1480.08	C118H185N18O69	1	54.58	17_Prostate_human_15ug_TR3_240619_f	04AI5,	1480.08	2958.15	1480.08	2	13.99	01Y41Y41M(31M41Y41L)61M61Y41L21F	324.43	13	62.5
P07711_YSVANDTGFVDIPK_5_HexNAc(2)Hex(5)	26224	P07711	YSVANDTGFVDIPK	N5GlcNAc	2	N2H5F0S0	15	N,4;	4	221	5	3.53159	31.04	14.66	1372.6	C115H181N18O58	1	125.45	18_adg_human_15ug_TR1_240615_f	03AI2,BI1,BII1,BIII1,CI1,CII1,CIII1,02AI3,24AI4,BI2,ZI1,YI1,YI2,BI4,YI3,YI4,YII4,YIII3,02XI1,ZI1,YI1,	1372.1	2742.18	1372.09	1	0	01Y41Y41M(31M)61M(31M)61M	324.22	27	92.31
P01877_TPLTANITK_6_HexNAc(5)Hex(3)	14833	P01877	TPLTANITK	N6GlcNAc	2	N5H3F0S0	0	N,6;	6	205	6	0.205983	47.43	17.27	1232.06	C100H171N16O54	1	73.25	15_bigintes_human_15ug_TR2_240616_f		1231.06	2460.11	1231.06	1	31.93	01Y41Y41M(31M41Y)61M(21Y)61Y	324.2	21	112.5
P04066_WGQNCSCHHGGYYNCEDK_4_HexNAc(2)Hex(3)Fuc(1)	14181	P04066	WGQNCSCHHGGYYNCEDK	N4GlcNAcC5CamC7CamC15Cam	3	N2H3F1S0	12	N,4;	4	268	4	0.577705	19.89	17.55	1104.41	C133H193N32O61S3	1	67.09	18_adg_human_15ug_TR1_240615_f	BI1,BII1,BI2,03AI2,CI2,BI3,YI1,YI2,YI3,YII3,02XI1,YI1,YI2,YI3,YII3,	1104.41	3310.21	1104.41	1	0	01Y(61F)41Y41M(31M)61M	324.05	24	67.65
O95835_ESLRNLSKPSDAAK_5_HexNAc(2)Hex(7)	23388	O95835	ESLRNLSKPSDAAK	N5GlcNAc	3	N2H7F0S0	4	N,1;	1	40	5	4.16413	39.69	13.93	1019.79	C121H207N22O68	1	117.3	human_brain_14ug_TR2_0703_f	BI2,04AI3,ZI3,YI3,	1019.79	3056.34	1019.79	2	14.13	01Y41Y41M(31M21M)61M(31M21M)61M	323.7	7	19.23
Q9BQF6_SKDDNHSK_5_HexNAc(2)Hex(8)	12637	Q9BQF6	SKDDNHSK	N5GlcNAc	2	N2H8F0S0	1	N,3;	3	579	5	0.999969	55.73	17.06	1317.51	C100H166N15O66	1	59.12	16_Pancreas_human_15ug_TR3_240614_f	25AI2,	1317.51	2633.01	1317.51	2	11.83	01Y41Y41M(31M21M21M)61M(31M21M)61M	323.69	12	64.29
P07585_LGLSFNSISAVDNGSLANTPHLR_13_HexNAc(4)Hex(4)Fuc(2)NeuAc(1)	33807	P07585	LGLSFNSISAVDNGSLANTPHLR	N13GlcNAc	3	N4H4F2S1	0	N,5;	5	262	13	0.0322603	37.65	22.15	1476.33	C182H297N36O90	1	159.59	20_Oesophagus_human_15ug_TR3_240618_f		1477	4426.98	1477	1	12.33	01Y41Y41M(31M41Y31F)61M21Y(31F)41L32S	323.39	33	70.45
P54289_IDVNSWIENFTK_9_HexNAc(2)Hex(8)	30902	P54289	IDVNSWIENFTK	N9GlcNAc	2	N2H8F0S0	1	N,7;	7	824	9	1.92485	46.67	17.81	1585.16	C131H207N18O71	1	155	human_brain_14ug_TR1_0703_f_28802-	25AIII2,	1585.17	3168.31	1585.16	2	0	01Y41Y41M(31M21M21M31G)61M(31M)61M	323.36	28	118.18
P07602_TCDWLPKPNMSASCK_9_HexNAc(3)Hex(4)Fuc(1)NeuAc(1)	24203	P07602	TCDWLPKPNMSASCK	C2CamN9GlcNAcC14Cam	3	N3H4F1S1	8	N,4;	4	101	9	1.34452	34.02	16.25	1164.47	C140H226N25O71S3	1	115.59	18_adg_human_15ug_TR2_240615_f	ZI1,YI1,ZI2,YI2,YI3,YI4,ZI1,YI1,	1164.48	3489.4	1164.47	2	19.93	01Y41Y41M(31M)61M21Y(31F)41L32S	323.17	21	67.86
P02751_GGNSNGALCHFPFLYNNHNYTDCTSEGR_19_HexNAc(4)Hex(5)Fuc(1)NeuAc(1)	31323	P02751	GGNSNGALCHFPFLYNNHNYTDCTSEGR	C9CamN19GlcNAcC23Cam	4	N4H5F1S1	0	N,2;	2	430	19	1.26538	31.88	22.84	1317.28	C214H322N47O103S2	1	148.31	17_Prostate_human_15ug_TR3_240619_f		1316.78	5262.08	1316.78	1	1.73	01Y41Y41M(31M)61M(21Y41L32S)61Y(31F)41L	323.11	18	33.33
P55290_NLSVVILGASDKDLHPNTDPFK_1_HexNAc(3)Hex(6)Fuc(1)NeuAc(1)	32559	P55290	NLSVVILGASDKDLHPNTDPFK	N1GlcNAc	4	N3H6F1S1	9	N,6;	6	598	1	2.26866	29.67	13.8	1101	C183H297N32O91	1	164.78	13_Heart_human_10ug_TR1_231111_f	BIII3,BIII3,BIII4,YIII3,YIII4,ZI1,YI1,YI2,YIII4,	1101	4398.96	1101	1	17.22	01Y(61F)41Y41M(31M41Y41L32S)61M(31M)61M	322.91	33	78.57
Q96KA5_VKDLMVINR_8_HexNAc(2)Hex(6)	19382	Q96KA5	VKDLMVINR	N8GlcNAc	3	N2H6F0S0	3	N,6;	6	229	8	0.209997	61.11	21.79	822.708	C99H173N16O53S1	1	92.6	16_Pancreas_human_15ug_TR1_240614_f	BI2,ZI3,YI3,	823.041	2466.11	823.041	1	7.48	01Y41Y41M(31M21M)61M(31M)61M	322.8	20	106.25
Q685J3_TVLDNATEVVKEK_5_HexNAc(2)Hex(7)	25502	Q685J3	TVLDNATEVVKEK	N5GlcNAc	3	N2H7F0S0	4	N,2;	2	4267	5	2.21788	33.94	12.46	996.445	C120H205N18O68	1	121.99	04_Stomach_human_15ug_TR2_240614_f	45AI3,YI3,ZI3,YI3,	996.446	2986.31	996.444	1	2.28	01Y41Y41M(31M)61M(31M21M)61M21M	322.75	9	25
Q96DT5_LPEEFNMAEIMQKNSNR_16_HexNAc(2)Hex(3)	26740	Q96DT5	LPEEFNMAEIMQKNSNR	N16GlcNAc	3	N2H3F0S0	12	N,3;	3	4277	16	9.65265	36.32	11.52	982.111	C120H196N27O54S2	1	127.94	18_adg_human_15ug_TR3_240615_f	BI1,BII1,BI2,BI3,YI1,YI2,02XI1,ZI1,YI1,ZI2,YI2,YI3,YII3,YI1,	982.111	2943.29	982.101	1	0	01Y41Y41M(31M)61M	322.49	8	21.88
P12111_QLINALQINNTAVGHALVLPAGR_9_HexNAc(4)Hex(5)Fuc(1)NeuAc(1)	35221	P12111	QLINALQINNTAVGHALVLPAGR	N9GlcNAc	3	N4H5F1S1	0	N,1;	1	2558	9	3.61707	42.18	20.17	1482.38	C184H309N38O87	1	169.53	10_Fat_human_15ug_TR2_231011_f		1482.38	4443.09	1482.37	1	1.64	01Y41Y41M(31M)61M(21Y(31F)41L32S)61Y41L	322.49	24	54.55
P25440_RLQDVSGQLNSTK_10_HexNAc(2)Hex(5)	24676	P25440	RLQDVSGQLNSTK	N10GlcNAc	3	N2H5F0S0	18	N,1;	1	748	10	4.38312	39.26	16.16	888.408	C105H181N22O57	1	125.29	human_kidney_9ug_TR3_0701_f	BI1,BII1,BIII1,BI2,YI1,YI2,14XI1,02XI1,ZI1,YI1,02XI2,ZI2,YI2,BI4,ZI3,YI3,YI4,YII4,YIII3,02XI1,ZI1,YI1,	888.408	2662.19	888.404	1	0	01Y41Y41M(31M)61M(31M)61M	322.39	8	20.83
P01877_HYTNSSQDVTVPCR_4_HexNAc(2)Hex(9)	12439	P01877	HYTNSSQDVTVPCR	N4GlcNAcC13Cam	3	N2H9F0S0	0	N,9;	9	92	4	2.16431	48.47	23.51	1177.47	C138H223N24O80S1	1	61.97	15_bigintes_human_15ug_TR2_240616_f		1177.14	3528.38	1177.13	2	0	01Y41Y41M(31M21M21M31G31G)61M(31M)61M	322.37	26	96.15
Q13360_NSSCLRVHVR_1_HexNAc(2)Hex(5)	12917	Q13360	NSSCLRVHVR	N1GlcNAcC4Cam	3	N2H5F0S0	19	N,1;	1	435	1	0.163339	57.24	15.88	815.693	C95H163N22O50S1	1	68.66	human_intestine_14ug_TR1_0704_f	BI1,BII1,BIII1,BI2,03AI2,CI2,YI1,BI2,YI2,02XI1,ZI1,YI1,02XI2,ZI2,YI2,YI3,YI4,YII4,YIII3,02XI1,ZI1,YI1,YI2,	815.693	2444.06	815.693	1	0	01Y41Y41M(31M)61M(31M)61M	321.56	6	22.22
P18507_FNSTIK_2_HexNAc(2)Hex(7)	11890	P18507	FNSTIK	N2GlcNAc	2	N2H7F0S0	3	N,3;	3	129	2	0.780318	64.6	15.16	1125.46	C90H149N10O55	2	55.7	02_RE_Liver_human_15ug_TR3_240613_f	BI2,BIII3,YI3,YIII3,YI3,YIII3,	1125.96	2249.92	1125.96	2	0	01Y41Y41M(31M21M21M)61M(31M)61M	321.48	10	70
Q9GZX6_EASLADNNTDVR_7_HexNAc(4)Hex(4)	18294	Q9GZX6	EASLADNNTDVR	N7GlcNAc	2	N4H4F0S0	0	N,2;	2	68	7	-7.45498	39.69	15.54	1384.56	C107H178N21O63	1	85.33	21_Bladder_human_15ug_TR2_240619_f		1383.56	2765.14	1383.57	1	48.47	01Y41Y41M(31M41Y41L)61M61Y	321.26	7	18.18
Q14314_LHVGNYNGTAGDALR_7_HexNAc(4)Hex(5)Fuc(1)NeuAc(1)	21167	Q14314	LHVGNYNGTAGDALR	N7GlcNAc	3	N4H5F1S1	0	N,3;	3	336	7	2.34453	37.05	22.21	1207.18	C145H234N27O79	1	99.17	21_Bladder_human_15ug_TR2_240619_f		1206.85	3617.51	1206.84	1	3.63	01Y41Y41M(31M)61M(21Y41L32S)61Y(31F)41L	321.13	22	71.43
O14773_FLSSSPHLPPSSYFNASGR_15_HexNAc(2)Hex(8)	25964	O14773	FLSSSPHLPPSSYFNASGR	N15GlcNAc	3	N2H8F0S0	4	N,5;	5	443	15	0.19604	42.65	16.62	1252.53	C157H242N27O78	1	124.18	18_adg_human_15ug_TR1_240615_f	45AI3,CI3,YI3,YI3,	1252.53	3753.58	1252.53	1	6.58	01Y41Y41M(31M21M)61M(31M21M)61M21M	321.06	20	52.78
P02751_GGNSNGALCHFPFLYNNHNYTDCTSEGR_19_HexNAc(4)Hex(3)Fuc(1)	28069	P02751	GGNSNGALCHFPFLYNNHNYTDCTSEGR	C9CamN19GlcNAcC23Cam	4	N4H3F1S0	0	N,2;	2	430	19	0.389134	41.33	17.81	1162.98	C191H285N46O85S2	1	135.2	15_bigintes_human_15ug_TR2_240616_f		1162.98	4646.88	1162.98	1	4.51	01Y41Y41M(31M41Y31F)61M61Y	321	19	35.19
P12109_ENYAELLEDAFLKNVTAQICIDK_14_HexNAc(2)Hex(6)	41960	P12109	ENYAELLEDAFLKNVTAQICIDK	N14GlcNAcC20Cam	3	N2H6F0S0	3	N,6;	6	804	14	2.59975	40.08	21.8	1359.95	C171H276N31O80S1	1	201.81	19_Ovarian_human_15ug_TR1_240617_f	BI2,BI2,YI3,	1359.95	4075.82	1359.95	1	6.4	01Y41Y41M(31M21M)61M(31M)61M	320.85	29	65.91
P19827_ICDLLVANNHFAHFFAPQNLTNMNK_19_HexNAc(4)Hex(5)NeuAc(2)	38189	P19827	ICDLLVANNHFAHFFAPQNLTNMNK	C2CamN19GlcNAc	4	N4H5F0S2	0	N,2;	2	285	19	2.07966	41.65	22.05	1284.81	C215H334N43O97S2	1	182.56	21_Bladder_human_15ug_TR3_240619_f		1284.81	5134.2	1284.81	1	9.85	01Y41Y41M(31M)61M(21Y41L32S)61Y41L32S	320.7	24	50
P02787_QQQHLFGSNVTDCSGNFCLFR_9_HexNAc(4)Hex(6)Fuc(1)NeuAc(1)	34846	P02787	QQQHLFGSNVTDCSGNFCLFR	N9GlcNAcC13CamC18Cam	4	N4H6F1S1	1	N,2;	2	630	9	0.205513	30.15	22.5	1185.49	C192H299N38O96S2	1	165.18	21_Bladder_human_15ug_TR1_240619_f	BII2,	1185.49	4736.91	1185.49	1	2.03	01Y41Y41M(31M(21Y41L32S)41Y(31F)41L)61M61M	320.67	28	67.5
P08575_SFHNFTLCYIK_4_HexNAc(4)Hex(5)NeuAc(1)	28700	P08575	SFHNFTLCYIK	N4GlcNAcC8Cam	3	N4H5F0S1	0	N,7;	7	421	4	3.93848	40.73	14.29	1115.47	C140H216N21O70S1	1	143.62	11_Spleen_human_15ug_TR1_231108_f		1115.47	3343.37	1115.46	1	1.16	01Y41Y41M(31M)61M(21Y41L32S)61Y41L	320.49	23	110
P10321_GYYNQSEDGSHTLQR_4_HexNAc(2)Hex(10)	13339	P10321	GYYNQSEDGSHTLQR	N4GlcNAc	3	N2H10F0S0	2	N,0;	0	110	4	4.01731	29	19.76	1261.83	C149H234N25O88	2	66.18	15_bigintes_human_15ug_TR3_240616_f	YIII3,YIII3,	1261.5	3781.46	1261.49	2	0	01Y41Y41M(31M21M21M31G31G21G)61M(31M)61M	320.39	17	57.14
P06681_QSVPAHFVALNGSK_11_HexNAc(2)Hex(6)	20207	P06681	QSVPAHFVALNGSK	N11GlcNAc	3	N2H6F0S0	2	N,6;	6	621	11	-0.178087	42.62	20.36	945.424	C117H190N21O59	1	95.96	19_Ovarian_human_15ug_TR3_240617_f	BI2,YI3,	945.423	2833.25	945.423	1	4.52	01Y41Y41M(31M)61M(31M21M)61M	320.33	26	96.15
Q8N766_FINYNQTVSR_5_HexNAc(2)Hex(9)	17872	Q8N766	FINYNQTVSR	N5GlcNAc	2	N2H9F0S0	0	N,4;	4	913	5	0.798625	74.64	29.41	1554.14	C125H201N18O72	1	85.67	02_RE_Liver_human_15ug_TR2_240613_f		1554.14	3106.26	1554.14	2	0	01Y41Y41M(31M21M21M31G31G)61M(31M)61M	320.31	19	88.89
O00712_SGVFNVSELVR_5_HexNAc(2)Hex(8)	18514	O00712	SGVFNVSELVR	N5GlcNAc	3	N2H8F0S0	4	N,2;	2	219	5	-3.39977	41.63	14.45	970.747	C117H194N17O67	1	86.52	20_Oesophagus_human_15ug_TR2_240618_f	YI3,ZI3,YI3,YI3,	970.746	2909.23	970.749	1	11.84	01Y41Y41M(31M21M)61M(31M21M)61M21M	320.31	6	20
Q5XPI4_KFLQENASGR_6_HexNAc(3)Hex(4)Fuc(1)NeuAc(1)	14165	Q5XPI4	KFLQENASGR	N6GlcNAc	3	N3H4F1S1	15	N,1;	1	538	6	2.4182	31.64	15.21	948.743	C114H187N20O63	1	66.69	18_adg_human_15ug_TR2_240615_f	BI3,15XI1,ZI1,YI1,ZI2,ZI3,YI3,35XI4,ZI4,YI4,ZI1,YI1,ZI3,YI3,ZI4,	949.076	2844.2	949.074	1	20.4	01Y(61F)41Y41M(31M)61M61Y41L32S	320.31	8	27.78
Q9Y4C4_GKPLNGSTAWYK_5_HexNAc(2)Hex(9)	15485	Q9Y4C4	GKPLNGSTAWYK	N5GlcNAc	3	N2H9F0S0	1	N,2;	2	842	5	0.894894	45.4	18.01	1063.12	C131H209N18O72	1	73.29	04_Stomach_human_15ug_TR2_240614_f	35AI3,	1063.12	3186.32	1063.11	1	9.52	01Y41Y41M(31M21M21M)61M(31M21M)61M21M	319.96	9	27.27
P07585_LGLSFNSISAVDNGSLANTPHLR_13_HexNAc(4)Hex(6)Fuc(2)	33682	P07585	LGLSFNSISAVDNGSLANTPHLR	N13GlcNAc	4	N4H6F2S0	0	N,4;	4	262	13	4.48662	24.41	19.96	1116.26	C183H300N35O92	2	159.64	17_Prostate_human_15ug_TR2_240619_f		1116.26	4459.99	1116.25	2	0.18	01Y41Y41M(31M(21Y(31F)41L21F)41Y41L)61M61M	319.94	31	68.18
P35916_NISLELVVNVPPQIHEK_1_HexNAc(2)Hex(4)	27159	P35916	NISLELVVNVPPQIHEK	N1GlcNAc	3	N2H4F0S0	20	N,1;	1	411	1	-1.72973	36.34	10.13	995.152	C127H212N25O56	1	130.96	10_Fat_human_15ug_TR2_231011_f	01AII2,BI1,BII1,BII2,BII2,BI2,ZI1,YI1,YI2,BI3,ZII3,YII3,YI3,YII4,MH,02XI1,ZI1,YI1,YI2,YII3,YI3,YII4,YI1,	995.488	2983.45	995.49	1	0	01Y41Y41M(31M21M)61M	319.75	7	18.75
P10909_MLNTSSLLEQLNEQFNWVSR_3_HexNAc(4)Hex(6)NeuAc(1)	45483	P10909	MLNTSSLLEQLNEQFNWVSR	N3GlcNAc	3	N4H6F0S1	0	N,5;	5	354	3	10.4999	46.35	26.25	1496.99	C184H295N34O92S1	1	217.76	17_Prostate_human_15ug_TR2_240619_f		1496.33	4484.92	1496.31	1	6.32	01Y41Y41M(31M(21Y41L32S)41Y41L)61M61M	319.73	33	84.21
Q6P179_NISDISENLK_1_HexNAc(2)Hex(8)	25503	Q6P179	NISDISENLK	N1GlcNAc	2	N2H8F0S0	1	N,4;	4	714	1	-0.857047	43.21	11.86	1419.09	C111H188N15O69	2	121.99	04_Stomach_human_15ug_TR2_240614_f	12AIII4,	1418.59	2835.17	1418.59	1	14.82	01Y41Y41M(31M21M21M31G)61M(31M)61M	319.7	15	66.67
P05783_IVDGKVVSETNDTK_11_HexNAc(2)Hex(7)	11219	P05783	IVDGKVVSETNDTK	N11GlcNAc	3	N2H7F0S0	2	N,2;	2	423	11	1.05941	43.64	16.86	1016.11	C121H206N19O70	2	52.33	02_RE_Liver_human_15ug_TR3_240613_f	YI3,YI3,	1016.11	3045.31	1016.11	1	19.63	01Y41Y41M(31M)61M(31M21M)61M21M	319.65	8	23.08
Q15293_VVRPDSELGERPPEDNQSFQYDHEAFLGK_16_HexNAc(2)Hex(6)	27277	Q15293	VVRPDSELGERPPEDNQSFQYDHEAFLGK	N16GlcNAc	5	N2H6F0S0	4	N,0;	0	53	16	0.894214	37.44	12.75	948.823	C199H306N43O90	1	138.44	12_Tetis_human_8ug_TR3_231109_f	BI2,CI2,BI2,YI3,	948.822	4738.07	948.821	2	0	01Y41Y41M(31M21M)61M(31M)61M	319.64	17	30.36
O15394_YNCTATNHIGTR_2_HexNAc(2)Hex(5)	12080	O15394	YNCTATNHIGTR	N2GlcNAcC3Cam	3	N2H5F0S0	15	N,3;	3	474	2	0.135161	32.57	13.84	875.695	C103H167N22O55S1	1	56.78	18_adg_human_15ug_TR1_240615_f	BI1,BII1,BIII1,BI2,YI1,YI2,02XI1,ZI1,YI1,ZI2,YI2,YI3,15XI4,YI4,YII4,YIII3,02XI1,ZI1,YI1,	875.695	2624.07	875.695	1	0	01Y41Y41M(31M)61M(31M)61M	319.46	23	90.91
Q9NQ38_SNGTGSESGKDTCDEFR_2_HexNAc(6)Hex(3)Fuc(2)	13139	Q9NQ38	SNGTGSESGKDTCDEFR	N2GlcNAcC13Cam	3	N6H3F2S0	0	N,2;	2	763	2	1.27038	65.21	30.25	1282.51	C149H240N29O86S1	1	60.52	20_Oesophagus_human_15ug_TR2_240618_f		1282.51	3843.5	1282.51	1	17.54	01Y41Y41M(31M(21Y31F)41Y)61M(21Y31F)61Y	319.4	23	62.5
P07602_DVVTAAGDMLKDNATEEEILVYLEK_13_HexNAc(2)Hex(3)Fuc(1)	38941	P07602	DVVTAAGDMLKDNATEEEILVYLEK	N13GlcNAc	3	N2H3F1S0	7	N,12;	12	80	13	2.28251	21.28	14.46	1269.59	C160H263N30O73S1	1	188.31	18_adg_human_15ug_TR3_240615_f	BI1,BII1,BI2,34AI3,35AI3,BI3,02XI1,YI1,	1269.59	3804.75	1269.59	1	0	01Y(61F)41Y41M(31M)61M	319.34	38	79.17
P51888_IHYLYLQNNFITELPVESFQNATGLR_21_HexNAc(4)Hex(5)Fuc(1)NeuAc(1)	42573	P51888	IHYLYLQNNFITELPVESFQNATGLR	N21GlcNAc	3	N4H5F1S1	0	N,9;	9	124	21	2.54254	49.28	28.94	1714.79	C221H344N41O98	1	202.02	17_Prostate_human_15ug_TR1_240619_f		1714.78	5140.32	1714.78	2	6.05	01Y41Y41M(31M41Y41L)61M21Y(31F)41L32S	319.31	34	66
P21810_MIENGSLSFLPTLR_4_HexNAc(4)Hex(5)Fuc(1)NeuAc(1)	35173	P21810	MIENGSLSFLPTLR	N4GlcNAc	3	N4H5F1S1	0	N,2;	2	270	4	2.5421	41.38	22.68	1213.87	C149H246N23O78S1	1	168.17	21_Bladder_human_15ug_TR2_240619_f		1213.53	3637.57	1213.53	1	11.9	01Y(61F)41Y41M(31M41Y41L)61M61Y41L32S	319.22	26	88.46
Q9UH65_SQLKVLSHNLCTVLK_9_HexNAc(2)Hex(8)	25561	Q9UH65	SQLKVLSHNLCTVLK	N9GlcNAcC11Cam	3	N2H8F0S0	0	N,1;	1	38	9	9.93588	40.63	14.52	1148.54	C140H241N24O72S1	1	123.75	02_RE_Liver_human_15ug_TR3_240613_f		1148.54	3442.57	1148.53	2	2.49	01Y41Y41M(31M21M21M31G)61M(31M)61M	319.2	6	17.86
P07711_YSVANDTGFVDIPKQEK_5_HexNAc(2)Hex(3)	24040	P07711	YSVANDTGFVDIPKQEK	N5GlcNAc	3	N2H3F0S0	15	N,2;	2	221	5	-2.19087	31.57	11.97	935.761	C119H188N23O54	1	114.79	18_adg_human_15ug_TR3_240615_f	03AI2,BI1,BII1,BI2,34AI3,01AI2,BI3,YI1,YI2,YI3,YII3,02XI1,ZI1,YI1,YI2,YI3,YII3,YI1,	935.426	2803.27	935.428	1	0	01Y41Y41M(31M)61M	318.95	23	68.75
P00738_VVLHPNYSQVDIGLIK_6_HexNAc(5)Hex(6)Fuc(2)NeuAc(2)	30307	P00738	VVLHPNYSQVDIGLIK	N6GlcNAc	3	N5H6F2S2	0	N,8;	8	241	6	-3.71379	40.23	24.54	1553.68	C193H315N28O102	1	145	19_Ovarian_human_15ug_TR3_240617_f		1553.68	4657.03	1553.68	2	0.8	01Y41Y41M(31M41Y41L)61M(21Y(31F)41L32S)61Y(31F)41L32S	318.9	29	90
P19801_LENITNPWSPR_3_HexNAc(3)Hex(3)	25899	P19801	LENITNPWSPR	N3GlcNAc	3	N3H3F0S0	8	N,2;	2	538	3	6.27096	31.68	11.06	807.702	C101H161N20O48	1	128.97	11_Spleen_human_15ug_TR3_231108_f_24580-	15AI1,BI1,CI1,01AI2,BI2,CI2,45AI3,YI3,	808.37	2422.08	808.365	1	2.64	01Y41Y41M(31M)61M61Y	318.84	9	35
Q9HCK8_DGNITGIQQFSKK_3_HexNAc(2)Hex(6)	21960	Q9HCK8	DGNITGIQQFSKK	N3GlcNAc	3	N2H6F0S0	5	N,1;	1	1291	3	0.752962	51.37	15.49	939.083	C114H189N20O61	1	105.69	16_Pancreas_human_15ug_TR2_240614_f	04AI3,BI2,YI3,ZI3,YI3,	939.083	2814.23	939.083	1	11.99	01Y41Y41M(31M)61M(31M21M)61M	318.79	10	29.17
P01008_LGACNDTLQQLMEVFK_5_HexNAc(4)Hex(6)Fuc(1)NeuAc(1)	42509	P01008	LGACNDTLQQLMEVFK	C4CamN5GlcNAc	3	N4H6F1S1	0	N,3;	3	128	5	4.38065	39.6	20.73	1363.91	C165H271N26O88S2	1	203.5	21_Bladder_human_15ug_TR1_240619_f		1364.25	4088.7	1364.24	1	1.92	01Y41Y41M(31M(21Y(31F)41L32S)41Y41L)61M61M	318.76	31	93.33
Q12907_VFPYISVMVNNGSLSYDHSK_11_HexNAc(4)Hex(3)Fuc(1)	32864	Q12907	VFPYISVMVNNGSLSYDHSK	N11GlcNAc	3	N4H3F1S0	0	N,7;	7	183	11	2.01456	33.49	15.68	1235.55	C158H246N29O70S1	1	159.5	16_Pancreas_human_15ug_TR1_240614_f		1235.22	3701.63	1235.22	1	14.85	01Y(61F)41Y41M(31M41Y)61M61Y	318.71	29	76.32
Q32P28_VPLQSAHLYYNVTEK_11_HexNAc(2)Hex(6)	24584	Q32P28	VPLQSAHLYYNVTEK	N11GlcNAc	3	N2H6F0S0	4	N,6;	6	540	11	1.30538	36.95	16.75	1047.81	C133H211N22O64	1	125.53	12_Tetis_human_8ug_TR2_231109_f	BI2,CI2,BI2,YI3,	1047.81	3140.39	1047.8	2	0	01Y41Y41M(31M21M)61M(31M)61M	318.3	27	92.86
P05164_SCPACPGSNITIR_9_HexNAc(2)Hex(3)Fuc(1)	19661	P05164	SCPACPGSNITIR	C2CamC5CamN9GlcNAc	2	N2H3F1S0	13	N,7;	7	323	9	3.33325	33.6	17.56	1236.53	C97H164N21O49S2	1	98.69	11_Spleen_human_15ug_TR3_231108_f	03AI2,BI1,BII1,03AI3,BI3,02XI1,YI1,YI2,YI3,YII3,MH,02XI1,34XI1,ZI1,YI1,	1236.53	2471.04	1236.53	1	0	01Y(61F)41Y41M(31M)61M	318.13	27	100
P51884_KLHINHNNLTESVGPLPK_8_HexNAc(5)Hex(5)Fuc(1)	22775	P51884	KLHINHNNLTESVGPLPK	N8GlcNAc	4	N5H5F1S0	0	N,1;	1	127	8	1.9795	34.38	22.87	996.965	C165H273N32O80	1	116.67	12_Tetis_human_8ug_TR2_231109_f		996.966	3982.83	996.964	1	5.46	01Y41Y41M(31M41Y41L31Y41L)61M61Y31F	318.03	19	52.94
P51884_LHINHNNLTESVGPLPK_7_HexNAc(5)Hex(6)Fuc(1)NeuAc(2)	24072	P51884	LHINHNNLTESVGPLPK	N7GlcNAc	4	N5H6F1S2	0	N,5;	5	127	7	1.9062	30.02	17.87	1151	C187H305N32O100	1	112.83	17_Prostate_human_15ug_TR1_240619_f		1151	4598.98	1151	1	5.92	01Y(61F)41Y41M(31M41Y41L)61M(21Y41L32S)61Y41L32S	318	26	75
Q0VAK6_CLQFNETLTELR_5_HexNAc(2)Hex(6)	21285	Q0VAK6	CLQFNETLTELR	C1CamN5GlcNAc	3	N2H6F0S0	5	N,1;	1	337	5	1.3673	45.02	14.34	968.751	C117H193N20O62S1	1	107.89	human_kidney_9ug_TR2_0701_f	BI2,BI2,04AI3,YI3,YI3,	968.417	2902.23	968.416	1	9.36	01Y41Y41M(31M)61M(31M21M)61M	317.77	8	22.73
Q07954_LNGSFR_2_HexNAc(2)Hex(7)	11300	Q07954	LNGSFR	N2GlcNAc	2	N2H7F0S0	5	N,2;	2	1995	2	0.282205	85.75	28.83	1117.45	C88H145N12O54	1	52.81	02_RE_Liver_human_15ug_TR2_240613_f	BI2,BI2,ZI3,YI3,YI3,	1117.95	2233.9	1117.95	1	5.49	01Y41Y41M(31M21M)61M(31M21M)61M	317.36	14	110
Q70CQ4_RLNSSVVDTQSK_3_HexNAc(2)Hex(6)	17109	Q70CQ4	RLNSSVVDTQSK	N3GlcNAc	2	N2H6F0S0	5	N,2;	2	959	3	-4.12681	47.39	15.73	1357.09	C106H183N20O61	1	81.57	16_Pancreas_human_15ug_TR2_240614_f	BI2,CI2,ZI3,YI3,YI3,	1357.09	2712.18	1357.1	1	9.54	01Y41Y41M(31M21M)61M(31M)61M	317.32	12	36.36
O75116_NLTLKIEQETQK_1_HexNAc(2)Hex(6)	25170	O75116	NLTLKIEQETQK	N1GlcNAc	2	N2H6F0S0	3	N,3;	3	791	1	2.04891	44.32	12.97	1412.64	C114H196N19O62	1	120.3	18_adg_human_15ug_TR2_240615_f	BI2,ZI3,YI3,	1412.65	2823.28	1412.64	1	9.67	01Y41Y41M(31M21M)61M(31M)61M	317.28	9	27.27
P02751_GGNSNGALCHFPFLYNNHNYTDCTSEGR_19_HexNAc(4)Hex(4)NeuAc(1)	31643	P02751	GGNSNGALCHFPFLYNNHNYTDCTSEGR	C9CamN19GlcNAcC23Cam	4	N4H4F0S1	6	N,1;	1	430	19	2.12529	52.6	23.32	1239.75	C202H302N47O94S2	1	149.91	17_Prostate_human_15ug_TR3_240619_f	03AI5,BII2,CII2,03AI5,35AI5,YII3,	1239.75	4953.97	1239.75	1	11.89	01Y41Y41M(31M41Y)61M61Y41L32S	317.06	15	27.78
Q07954_WTGHNVTVVQR_5_HexNAc(4)Hex(5)Fuc(1)NeuAc(1)	15836	Q07954	WTGHNVTVVQR	N5GlcNAc	3	N4H5F1S1	1	N,2;	2	1511	5	0.817932	38.23	21.02	1119.81	C136H219N24O73	1	74.49	19_Ovarian_human_15ug_TR1_240617_f	03AI5,	1119.81	3356.42	1119.81	2	7.59	01Y41Y41M(31M41Y41L)61M21Y(31F)41L32S	316.83	16	65
P08648_VTGLNCTTNHPINPK_5_HexNAc(4)Hex(5)Fuc(2)NeuAc(1)	14334	P08648	VTGLNCTTNHPINPK	N5GlcNAcC6Cam	3	N4H5F2S1	2	N,6;	6	868	5	1.37488	37.02	20.62	1291.55	C155H256N27O84S1	1	70.96	15_bigintes_human_15ug_TR2_240616_f	YI3,YI3,	1291.89	3871.63	1291.88	2	1.16	01Y41Y41M(31M)61M(21Y(31F)41L32S)61Y(31F)41L	316.7	25	82.14
Q15147_ANNVSPMTCLK_3_HexNAc(2)Hex(8)	11083	Q15147	ANNVSPMTCLK	N3GlcNAcC9Cam	2	N2H8F0S0	0	N,1;	1	140	3	3.65347	46.93	15.09	1469.6	C114H194N17O67S2	1	51.45	16_Pancreas_human_15ug_TR3_240614_f		1469.6	2937.17	1469.59	2	9.3	01Y41Y41M(31M21M21M)61M(31M21M)61M	316.67	8	25
P02751_RHEEGHMLNCTCFGQGR_9_HexNAc(3)Hex(3)Fuc(1)	16553	P02751	RHEEGHMLNCTCFGQGR	N9GlcNAcC10CamC12Cam	4	N3H3F1S0	8	N,2;	2	542	9	-0.115797	26.48	18.63	833.593	C131H209N34O61S3	1	76.62	15_bigintes_human_15ug_TR1_240616_f	BI1,CI1,02AI2,BI2,CI2,YI3,YI4,YI3,	833.593	3330.35	833.593	2	45.13	01Y(61F)41Y41M(31M)61M61Y	316.66	19	59.38
P11279_SSCGKENTSDPSLVIAFGR_7_HexNAc(3)Hex(4)Fuc(1)NeuAc(1)	27162	P11279	SSCGKENTSDPSLVIAFGR	C3CamN7GlcNAc	3	N3H4F1S1	11	N,2;	2	84	7	1.31977	41.85	22.58	1240.87	C149H244N29O78S1	1	129.98	18_adg_human_15ug_TR3_240615_f	24AI3,15AI3,BI3,YI2,ZI1,YI1,YI2,YI3,YI4,ZI1,YI1,	1241.2	3719.57	1241.2	1	2.22	01Y41Y41M(31M)61M21Y(31F)41L32S	316.56	24	61.11
Q13683_KNITLDCAR_2_HexNAc(3)Hex(6)NeuAc(1)	14223	Q13683	KNITLDCAR	N2GlcNAcC7Cam	3	N3H6F0S1	10	N,1;	1	989	2	-0.586519	53.18	22.02	988.745	C115H196N19O68S1	1	65.1	17_Prostate_human_15ug_TR1_240619_f	02AIII2,BIII2,BIII1,CIII1,35AIII4,BIII2,35AIII3,BIII3,YIII5,YIII6,	988.745	2963.22	988.746	1	36.71	01Y41Y41M(31M41Y41L32S)61M(31M)61M	316.5	19	93.75
O75629_VNETEMDIAK_2_HexNAc(2)Hex(4)	16416	O75629	VNETEMDIAK	N2GlcNAc	2	N2H4F0S0	16	N,5;	5	160	2	1.53479	54.04	17.95	1102.96	C87H147N14O49S1	1	77.7	18_adg_human_15ug_TR2_240615_f	03AI2,14AII2,BI1,BII1,BII2,BII2,BI2,02XI1,ZI1,YI1,ZI2,YI2,BI3,YII3,02XI1,ZI1,YI1,YI2,	1102.96	2203.92	1102.96	1	0	01Y41Y41M(31M21M)61M	316.48	25	122.22
Q9Y5Q0_MPRHNYSR_5_HexNAc(2)Hex(5)	28380	Q9Y5Q0	MPRHNYSR	N5GlcNAc	2	N2H5F0S0	20	N,1;	1	396	5	6.71656	62.02	13.72	1139.48	C90H146N19O47S1	1	144.22	12_Tetis_human_8ug_TR1_231109_f	BI1,BII1,BIII1,25AI4,BI2,02XI1,ZI1,YI1,02XI2,ZI2,YI2,ZI3,YI3,BI4,YI4,YII4,YIII3,02XI1,34XI1,ZI1,YI1,ZI2,YI2,YI3,	1139.48	2276.93	1139.47	1	0	01Y41Y41M(31M)61M(31M)61M	316.42	6	28.57
Q92820_NFTMNEK_1_HexNAc(2)Hex(6)	13409	Q92820	NFTMNEK	N1GlcNAc	2	N2H6F0S0	4	N,4;	4	203	1	0.999499	51.7	17.44	1131.44	C89H145N12O53S1	1	62.92	18_adg_human_15ug_TR2_240615_f	15AI2,BI2,YI3,YI3,	1131.94	2261.87	1131.94	2	0	01Y41Y41M(31M21M)61M(31M)61M	316.41	18	125
P02679_VDKDLQSLEDILHQVENK_17_HexNAc(4)Hex(6)NeuAc(1)	35458	P02679	VDKDLQSLEDILHQVENK	N17GlcNAc	4	N4H6F0S1	8	N,6;	6	78	17	-1.79897	39.26	18.53	1050.96	C170H281N30O91	1	170.81	19_Ovarian_human_15ug_TR3_240617_f	BI2,25AI2,25AII2,BI2,BII2,45AI3,CII2,YII3,YII3,	1050.96	4198.83	1050.96	1	3.39	01Y41Y41M(31M(21Y41L32S)41Y41L)61M61M	316.27	25	70.59
Q8NCV1_GLSLNWSLGDPGIEVVDVATGR_5_HexNAc(2)Hex(5)	29602	Q8NCV1	GLSLNWSLGDPGIEVVDVATGR	N5GlcNAc	3	N2H5F0S0	17	N,2;	2	488	5	-0.282698	24.22	10.4	1158.54	C145H236N29O68	1	138.87	20_Oesophagus_human_15ug_TR2_240618_f	BI1,BII1,BIII1,BI2,24AI4,BI2,ZI1,YI1,ZI2,YI2,YI3,BI4,02XI1,ZI1,YI1,YI2,YI3,YI4,YII4,YIII3,YI1,	1158.2	3471.59	1158.2	1	0	01Y41Y41M(31M)61M(31M)61M	316.14	10	21.43
Q15911_TEAGDEKPKLAEAPSAQPNQTQEK_19_HexNAc(2)Hex(9)	33353	Q15911	TEAGDEKPKLAEAPSAQPNQTQEK	N19GlcNAc	4	N2H9F0S0	1	N,0;	0	2441	19	3.39959	23.99	10.93	1109.23	C177H292N33O97	2	160.32	18_adg_human_15ug_TR1_240615_f	25AI2,25AIII3,	1109.23	4431.89	1109.23	1	19.18	01Y41Y41M(31M21M21M31G31G)61M(31M)61M	315.88	8	15.22
Q6Q8B3_ETNETKETNCTVER_3_HexNAc(3)Hex(5)	14838	Q6Q8B3	ETNETKETNCTVER	N3GlcNAcC10Cam	4	N3H5F0S0	0	N,1;	1	86	3	0.296967	40.35	17.3	783.572	C120H201N24O70S1	1	68.53	21_Bladder_human_15ug_TR3_240619_f		783.572	3130.26	783.572	1	21.07	01Y41Y41M(31M)(41Y)61M31M21M	315.6	8	26.92
O14926_MPTNGLHQVLKIQFGLVNDTDR_18_HexNAc(2)Hex(9)	30937	O14926	MPTNGLHQVLKIQFGLVNDTDR	N18GlcNAc	3	N2H9F0S0	1	N,1;	1	18	18	-2.10571	21.48	11.42	1454.98	C179H295N34O88S1	1	150.32	02_RE_Liver_human_15ug_TR3_240613_f	25AI3,	1454.98	4360.94	1454.99	1	29.43	01Y41Y41M(31M21M21M)61M(31M21M)61M21M	315.54	9	19.05
P12110_GTFTDCALANMTEQIR_10_HexNAc(4)Hex(5)NeuAc(1)	31533	P12110	GTFTDCALANMTEQIR	C6CamN10GlcNAc	3	N4H5F0S1	0	N,4;	4	140	10	1.65942	49.49	24.21	1248.52	C148H242N27O80S2	1	149.36	17_Prostate_human_15ug_TR3_240619_f		1248.51	3741.51	1248.51	1	1.07	01Y41Y41M(31M)61M(21Y41L32S)61Y41L	315.29	27	80
P02790_ALPQPQNVTSLLGCTH_7_HexNAc(4)Hex(5)NeuAc(1)	31465	P02790	ALPQPQNVTSLLGCTH	N7GlcNAcC14Cam	3	N4H5F0S1	2	N,3;	3	453	7	3.75277	45.65	21.12	1217.86	C147H242N27O77S1	1	148.3	21_Bladder_human_15ug_TR1_240619_f	03AI5,35AI5,	1217.53	3649.56	1217.53	1	13.79	01Y41Y41M(31M41Y41L)61M61Y41L32S	314.82	25	73.33
P12111_QLINALQINNTAVGHALVLPAGR_9_HexNAc(4)Hex(5)Fuc(1)	32007	P12111	QLINALQINNTAVGHALVLPAGR	N9GlcNAc	3	N4H5F1S0	0	N,1;	1	2558	9	7.71478	36.99	21.67	1385.01	C173H292N37O79	1	154.18	15_bigintes_human_15ug_TR3_240616_f		1385.35	4152	1385.34	2	3.4	01Y41Y41M(31M41Y(31F)41L)61M61Y41L	314.55	24	52.27
P21810_MIENGSLSFLPTLR_4_HexNAc(5)Hex(5)Fuc(1)	34081	P21810	MIENGSLSFLPTLR	N4GlcNAc	3	N5H5F1S0	0	N,2;	2	270	4	2.14029	44.41	22.13	1184.53	C146H242N23O75S1	1	172.14	12_Tetis_human_8ug_TR3_231109_f_28882-		1184.19	3549.56	1184.19	2	9.1	01Y(61F)41Y41M(31M41Y41L31Y41L)61M61Y	314.48	25	84.62
P24821_NTTSYVLR_1_HexNAc(4)Hex(4)Fuc(1)	14271	P24821	NTTSYVLR	N1GlcNAc	2	N4H4F1S0	0	N,1;	1	1034	1	1.75002	48.74	19.96	1281.05	C103H171N16O58	1	70.65	15_bigintes_human_15ug_TR2_240616_f		1281.05	2560.09	1281.05	1	21.24	01Y(61F)41Y41M(31M41Y41L)61M61Y	314.25	14	78.57
P01876_LSLHRPALEDLLLGSEANLTCTLTGLR_18_HexNAc(3)Hex(6)NeuAc(1)	43178	P01876	LSLHRPALEDLLLGSEANLTCTLTGLR	N18GlcNAcC21Cam	4	N3H6F0S1	13	N,4;	4	144	18	4.21373	48.7	25.2	1210.07	C199H336N41O94S1	1	208.1	21_Bladder_human_15ug_TR2_240619_f	02AIII2,BIII2,BIII1,14AIII3,35AIII4,BIII2,CIII2,35AIII3,BIII3,35AIII4,BIII4,YIII5,YIII6,	1210.32	4836.25	1210.32	1	47.78	01Y41Y41M(31M41Y41L32S)61M(31M)61M	314.15	22	42.31
Q96N22_AFNHSSHLATHK_3_HexNAc(3)Hex(5)	20709	Q96N22	AFNHSSHLATHK	N3GlcNAc	2	N3H5F0S0	0	N,3;	3	544	3	4.09013	28.46	11.58	1385.6	C113H178N23O57	1	104.22	human_brain_14ug_TR2_0703_f		1385.6	2769.17	1385.59	1	8.77	01Y41Y41M(31M)(41Y)61M31M21M	313.98	9	27.27
Q07954_LNGTDPIVAADSK_2_HexNAc(2)Hex(5)	16796	Q07954	LNGTDPIVAADSK	N2GlcNAc	2	N2H5F0S0	16	N,5;	5	4075	2	-1.62204	45.61	15	1259.05	C101H170N17O56	1	86.12	human_brain_14ug_TR2_0703_f	03AI2,BI1,BII1,BIII1,03AI2,CI2,03AI4,BI2,02XI1,ZI1,YI1,YI2,BI4,YI3,YI4,YII4,YIII3,02XI1,ZI1,YI1,	1259.55	2517.1	1259.55	1	0	01Y41Y41M(31M)61M(31M)61M	313.95	30	112.5
P02679_VDKDLQSLEDILHQVENK_17_HexNAc(4)Hex(4)Fuc(1)NeuAc(1)	35522	P02679	VDKDLQSLEDILHQVENK	N17GlcNAc	4	N4H4F1S1	0	N,6;	6	78	17	2.40443	29.68	17.81	1006.45	C164H271N30O85	1	170.82	19_Ovarian_human_15ug_TR2_240617_f		1006.45	4020.78	1006.45	1	16.34	01Y41Y41M(31M)61M(21Y41L32S)61Y31F	313.87	25	67.65
Q16363_HVNEINATIYLLK_6_HexNAc(4)Hex(5)Fuc(1)	30530	Q16363	HVNEINATIYLLK	N6GlcNAc	3	N4H5F1S0	0	N,6;	6	315	6	1.96702	33.21	15.66	1099.84	C138H227N22O69	1	144.09	17_Prostate_human_15ug_TR2_240619_f		1099.84	3296.49	1099.84	2	2.53	01Y41Y41M(31M41Y(31F)41L)61M61Y41L	313.37	25	100
P13473_VASVININPNTTHSTGSCR_10_HexNAc(5)Hex(6)Fuc(1)	18976	P13473	VASVININPNTTHSTGSCR	N10GlcNAcC18Cam	3	N5H6F1S0	0	N,3;	3	257	10	0.334241	42.54	27.76	1388.6	C164H274N33O89S1	1	90.13	18_adg_human_15ug_TR2_240615_f		1388.6	4161.76	1388.6	1	2.33	01Y41Y41M(31M41Y41L31Y41L)61M61Y(31F)41L	313.21	21	52.78
O14657_EERPLNASALK_6_HexNAc(2)Hex(8)	15442	O14657	EERPLNASALK	N6GlcNAc	3	N2H8F0S0	1	N,3;	3	64	6	1.73527	49.2	19.97	977.757	C116H197N18O68	1	73.22	18_adg_human_15ug_TR1_240615_f	12AIII4,	977.758	2930.25	977.756	2	0	01Y41Y41M(31M21M21M31G)61M(31M)61M	313.18	16	70
P23515_QNITYLLK_2_HexNAc(2)Hex(5)	22770	P23515	QNITYLLK	N2GlcNAc	2	N2H5F0S0	16	N,6;	6	234	2	-0.043207	51.41	11.71	1105.51	C92H154N13O48	1	113.17	human_brain_14ug_TR3_0703_f	BI1,BII1,BIII1,03AI2,CI2,25AI2,02XI1,ZI1,YI1,ZI2,YI2,YI3,BI4,YI4,YII4,YIII3,02XI1,YI1,YI2,YI3,	1105.51	2209	1105.51	1	0	01Y41Y41M(31M)61M(31M)61M	312.97	20	128.57
P07602_TNSTFVQALVEHVKEECDR_2_HexNAc(2)Hex(3)	33360	P07602	TNSTFVQALVEHVKEECDR	N2GlcNAcC17Cam	4	N2H3F0S0	16	N,2;	2	215	2	-0.0782134	30.38	15.13	789.607	C129H209N30O59S1	1	160.43	18_adg_human_15ug_TR2_240615_f	03AI2,CI2,34AI3,BI1,BII1,BI2,24AI3,YI1,BI3,CI3,02XI1,ZI1,YI1,YI2,02XI1,ZI1,YI1,	789.606	3154.4	789.606	1	0	01Y41Y41M(31M)61M	312.94	24	66.67
P01877_HYTNSSQDVTVPCR_4_HexNAc(5)Hex(4)Fuc(1)NeuAc(1)	12940	P01877	HYTNSSQDVTVPCR	N4GlcNAcC13Cam	3	N5H4F1S1	0	N,6;	6	92	4	0.79346	56.34	28.17	1255.84	C149H239N28O82S1	1	64.29	15_bigintes_human_15ug_TR3_240616_f		1256.18	3764.51	1256.18	1	4.37	01Y41Y41M(31M41Y)61M(21Y41L32S)61Y31F	312.93	24	84.62
P02751_RHEEGHMLNCTCFGQGR_9_HexNAc(4)Hex(5)	16427	P02751	RHEEGHMLNCTCFGQGR	N9GlcNAcC10CamC12Cam	4	N4H5F0S0	3	N,0;	0	542	9	1.33119	35.95	21.13	929.127	C145H232N35O72S3	1	76.01	15_bigintes_human_15ug_TR1_240616_f	YI3,ZI3,YI3,	929.126	3711.47	929.125	2	49.3	01Y41Y41M(31M)61M(21Y41L)61Y41L	312.78	16	50
A8K2U0_THHWNITAVK_5_HexNAc(2)Hex(5)	18640	A8K2U0	THHWNITAVK	N5GlcNAc	3	N2H5F0S0	15	N,12;	12	857	5	1.72877	20.5	12.81	809.389	C101H160N19O49	1	87.85	20_Oesophagus_human_15ug_TR1_240618_f	BI1,BII1,BIII1,BI2,25AI4,YI2,02XI1,YI3,ZI1,YI1,YI2,YI3,YI4,YII4,YIII3,02XI1,ZI1,YI1,YI2,	808.695	2423.06	808.693	1	0	01Y41Y41M(31M)61M(31M)61M	312.71	22	105.56
Q9UK97_LSQDTDNQTK_7_HexNAc(2)Hex(5)	16007	Q9UK97	LSQDTDNQTK	N7GlcNAc	2	N2H5F0S0	19	N,1;	1	347	7	4.61667	51.98	14.96	1183.99	C91H153N16O56	1	75.95	18_adg_human_15ug_TR1_240615_f	01AI1,01AII1,01AIII1,BI1,BII1,BIII1,CI1,CII1,CIII1,25AI4,BI2,02XI1,ZI1,YI1,02XI2,ZI2,YI2,YI3,BI4,YI4,YII4,YIII3,02XI1,ZI1,YI1,YI2,YI3,	1183.99	2365.96	1183.99	1	0	01Y41Y41M(31M)61M(31M)61M	312.69	11	44.44
Q92626_VNNCSDMCFHQK_3_HexNAc(2)Hex(5)	12297	Q92626	VNNCSDMCFHQK	N3GlcNAcC4CamC8Cam	3	N2H5F0S0	14	N,0;	0	731	3	0.39775	43.97	19.29	919.35	C107H171N22O56S3	1	61.27	15_bigintes_human_15ug_TR3_240616_f	BI1,BII1,BIII1,BI2,02AI3,YI1,YI2,02XI1,ZI1,YI1,YI2,YI3,YI4,YII4,YIII3,02XI1,ZI1,YI1,	919.685	2756.04	919.685	1	0	01Y41Y41M(31M)61M(31M)61M	312.61	22	90.91
P00748_NHSCEPCQTLAVR_1_HexNAc(4)Hex(5)NeuAc(2)	17299	P00748	NHSCEPCQTLAVR	N1GlcNAcC4CamC7Cam	3	N4H5F0S2	4	N,2;	2	433	1	1.07806	38.93	19.84	1260.5	C146H239N28O83S2	1	80.34	21_Bladder_human_15ug_TR3_240619_f	BIII1,ZI3,YI3,YI3,	1260.17	3776.48	1260.17	1	5.78	01Y41Y41M(31M)61M(21Y41L32S)61Y41L32S	312.42	20	66.67
Q14112_IHQNITYQVCR_4_HexNAc(4)Hex(5)Fuc(1)NeuAc(1)	17865	Q14112	IHQNITYQVCR	N4GlcNAcC10Cam	3	N4H5F1S1	0	N,1;	1	703	4	1.14263	37.42	24.22	1164.82	C140H228N25O75S1	1	83.08	17_Prostate_human_15ug_TR3_240619_f		1164.82	3491.45	1164.82	2	2.29	01Y41Y41M(31M)61M(21Y41L32S)61Y(31F)41L	312.36	17	75
Q4KMQ2_LNITCESSK_2_HexNAc(2)Hex(6)	13236	Q4KMQ2	LNITCESSK	N2GlcNAcC5Cam	2	N2H6F0S0	5	N,5;	5	361	2	0.26799	57.85	20.61	1216	C94H161N14O57S1	1	62.4	18_adg_human_15ug_TR1_240615_f	BI2,04AI3,ZI3,YI3,YI3,	1216	2429.99	1216	1	10.84	01Y41Y41M(31M21M)61M(31M)61M	312.35	24	125
Q32NC0_MLLSQNESQKIPK_6_HexNAc(2)Hex(6)	23136	Q32NC0	MLLSQNESQKIPK	N6GlcNAc	3	N2H6F0S0	2	N,2;	2	197	6	3.1406	38.18	13.89	965.774	C117H201N20O61S1	1	117.16	human_brain_14ug_TR1_0703_f_new	BI2,YI3,	965.774	2894.3	965.771	2	0	01Y41Y41M(31M)61M(31M21M)61M	312.34	6	16.67
A8MYU2_ISGQDSPPRVSASTSSISNFTTR_19_HexNAc(2)Hex(5)	24968	A8MYU2	ISGQDSPPRVSASTSSISNFTTR	N19GlcNAc	3	N2H5F0S0	18	N,2;	2	666	19	12.0059	23.96	10.85	1205.22	C145H240N33O73	1	120.05	16_Pancreas_human_15ug_TR1_240614_f	01AI1,01AII1,01AIII1,BI1,BII1,BIII1,BI2,04AI3,BI2,45AI3,ZI1,YI1,ZI2,YI2,BI4,YI3,02XI1,YI1,YI2,YI3,YI4,YII4,YIII3,YI1,	1204.89	3611.61	1204.88	1	0	01Y41Y41M(31M)61M(31M)61M	312.33	10	20.45
P01591_ENISDPTSPLR_2_HexNAc(2)Hex(9)	17648	P01591	ENISDPTSPLR	N2GlcNAc	2	N2H9F0S0	0	N,4;	4	71	2	0.328067	70.05	26.86	1547.63	C121H202N17O75	1	91.98	human_intestine_14ug_TR1_0704_f		1547.63	3093.25	1547.63	1	10.15	01Y41Y41M(31M21M21M31G)61M(31M21M)61M	312.3	22	90
P55083_VDLEDFENNTAYAK_8_HexNAc(4)Hex(5)Fuc(1)NeuAc(2)	26931	P55083	VDLEDFENNTAYAK	N8GlcNAc	3	N4H5F1S2	2	N,4;	4	137	8	2.70471	40.06	20.08	1328.2	C161H252N23O92	1	136.98	12_Tetis_human_8ug_TR1_231109_f	YI3,YI3,	1327.87	3979.57	1327.87	1	14.19	01Y41Y41M(31M)61M(21Y(31F)41L32S)61Y41L32S	312.19	28	100
Q9H061_ENITIVDISR_2_HexNAc(2)Hex(5)	23149	Q9H061	ENITIVDISR	N2GlcNAc	2	N2H5F0S0	20	N,1;	1	11	2	-3.2113	50.98	11.66	1189.53	C95H163N16O53	1	110.53	18_adg_human_15ug_TR1_240615_f	BI1,BII1,BIII1,35AI2,02XI1,35XI1,ZI1,YI1,ZI2,YI2,15XI3,ZI3,YI3,BI4,ZI4,ZII4,ZIII3,YI4,YII4,YIII3,MH,02XI1,ZI1,YI1,YI2,YI3,	1189.03	2376.06	1189.03	1	0	01Y41Y41M(31M)61M(31M)61M	312.03	9	27.78
P18850_RDHLLLPATTHNK_12_HexNAc(2)Hex(6)	23746	P18850	RDHLLLPATTHNK	N12GlcNAc	3	N2H6F0S0	3	N,1;	1	584	12	-3.56187	40.12	14.63	965.774	C118H197N24O59	1	117.96	human_brain_14ug_TR3_0703_f	BI2,ZI3,YI3,	965.774	2894.32	965.778	1	4.73	01Y41Y41M(31M21M)61M(31M)61M	312.02	7	20.83
Q9UHG3_MSNITFLNFDPPIEEFHQYYQHIVTTLVK_3_HexNAc(2)Hex(6)	45999	Q9UHG3	MSNITFLNFDPPIEEFHQYYQHIVTTLVK	N3GlcNAc	4	N2H6F0S0	5	N,7;	7	323	3	2.35948	27.85	15.88	1227.07	C217H329N40O86S1	1	223.92	18_adg_human_15ug_TR3_240615_f	CI2,BI2,25AI2,BI2,YI3,	1227.07	4903.23	1227.07	2	0	01Y41Y41M(31M21M)61M(31M)61M	311.99	29	51.79
P19022_SNISILR_2_HexNAc(2)Hex(6)	20299	P19022	SNISILR	N2GlcNAc	2	N2H6F0S0	4	N,3;	3	692	2	2.27698	95.13	26.6	1091.48	C86H150N13O51	1	104.34	12_Tetis_human_8ug_TR2_231109_f	BI2,ZI3,YI3,YI3,	1091.48	2180.95	1091.48	1	5.32	01Y41Y41M(31M)61M(31M21M)61M	311.95	16	108.33
P01857_TKPREEQYNSTYR_9_HexNAc(4)Hex(5)	10798	P01857	TKPREEQYNSTYR	N9GlcNAc	3	N4H5F0S0	0	N,0;	0	180	9	-0.367327	51.65	22.64	1099.14	C133H213N26O70	1	49.66	15_bigintes_human_15ug_TR1_240616_f		1099.14	3294.39	1099.14	1	38.51	01Y41Y41M(31M41Y41L)61M61Y41L	311.89	10	33.33
Q2M389_MDKFAEDLTNR_10_HexNAc(4)Hex(3)	17747	Q2M389	MDKFAEDLTNR	N10GlcNAc	3	N4H3F0S0	0	N,1;	1	435	10	-3.73109	51.25	20.5	880.372	C106H173N20O55S1	1	85.05	02_RE_Liver_human_15ug_TR2_240613_f		880.372	2638.11	880.375	1	20.62	01Y41Y41M(31M41Y)61M61Y	311.78	10	30
P07339_YYKGSLSYLNVTR_10_HexNAc(2)Hex(5)Fuc(1)	23947	P07339	YYKGSLSYLNVTR	N10GlcNAc	3	N2H5F1S0	7	N,8;	8	263	10	1.15556	18.14	10.47	976.44	C124H197N20O60	1	114.37	18_adg_human_15ug_TR3_240615_f	01AI2,BI2,01AI2,BI2,CI2,23AI3,YI4,	976.44	2926.3	976.439	1	8.31	01Y(61F)41Y41M(31M)61M31M21M	311.77	26	100
Q8N9E0_LLSGNESSSKK_5_HexNAc(3)Hex(4)Fuc(1)NeuAc(1)	13887	Q8N9E0	LLSGNESSSKK	N5GlcNAc	3	N3H4F1S1	12	N,1;	1	84	5	0.796637	31.42	14.85	949.078	C112H191N18O66	1	65.63	18_adg_human_15ug_TR1_240615_f	BI3,ZI1,YI1,YI2,ZI3,YI3,ZI4,YI4,ZI1,YI1,YI3,YI4,	949.078	2844.21	949.077	1	13.68	01Y(61F)41Y41M(31M)61M61Y41L32S	311.77	10	30
Q8NCV1_GLSLNWSLGDPGIEVVDVATGR_5_HexNAc(2)Hex(6)	28667	Q8NCV1	GLSLNWSLGDPGIEVVDVATGR	N5GlcNAc	3	N2H6F0S0	4	N,2;	2	488	5	0.00322884	28.52	11.33	1212.55	C151H246N29O73	2	135.8	19_Ovarian_human_15ug_TR1_240617_f	BI2,BI2,YI3,YI3,	1212.22	3633.64	1212.22	1	0	01Y41Y41M(31M21M)61M(31M)61M	311.75	7	14.29
P04233_MATPLLMQALPMGALPQGPMQNATK_22_HexNAc(2)Hex(8)	37616	P04233	MATPLLMQALPMGALPQGPMQNATK	N22GlcNAc	3	N2H8F0S0	0	N,13;	13	130	22	1.20536	38.49	13.73	1439.31	C177H299N32O82S4	2	181.72	18_adg_human_15ug_TR1_240615_f		1438.98	4312.91	1438.98	1	4.88	01Y41Y41M(31M21M21M)61M(31M21M)61M	311.68	35	72.92
P14625_HNNDTQHIWESDSNEFSVIADPR_3_HexNAc(2)Hex(9)	28425	P14625	HNNDTQHIWESDSNEFSVIADPR	N3GlcNAc	3	N2H9F0S0	0	N,8;	8	217	3	6.29192	58.5	26.44	1526.96	C185H284N37O97	1	137.96	02_RE_Liver_human_15ug_TR1_240613_f		1526.63	4575.84	1526.62	1	7.32	01Y41Y41M(31M21M21M31G)61M(31M21M)61M	311.64	27	61.36
Q8IVD9_CVLVNLSK_5_HexNAc(2)Hex(5)	17471	Q8IVD9	CVLVNLSK	C1CamN5GlcNAc	2	N2H5F0S0	16	N,1;	1	264	5	-0.957655	48.1	15.87	1075.48	C86H150N13O47S1	1	83	16_Pancreas_human_15ug_TR1_240614_f	BI1,BII1,BIII1,CI1,CII1,CIII1,BI2,YI1,YI2,ZI3,YI3,YI4,YII4,YIII3,BI4,02XI1,MH,ZI1,YI1,ZI2,YI2,YI3,	1075.48	2148.95	1075.48	1	0	01Y41Y41M(31M)61M(31M)61M	311.58	12	64.29
Q8NF91_LARENR_5_HexNAc(2)Hex(6)	17437	Q8NF91	LARENR	N5GlcNAc	2	N2H6F0S0	4	N,1;	1	8070	5	0.976428	85.78	20.88	1068.96	C82H142N15O50	2	89.87	human_brain_14ug_TR1_0703_f_new	BI2,ZI3,YI3,YI3,	1068.96	2136.9	1068.96	1	0	01Y41Y41M(31M21M)61M(31M)61M	311.39	6	40
Q8IYU4_VIYNSSGGFSSNTSANDTLNK_4_HexNAc(4)Hex(5)NeuAc(1)	35630	Q8IYU4	VIYNSSGGFSSNTSANDTLNK	N4GlcNAc	4	N4H5F0S1	0	N,3;	3	334	4	2.91853	40.27	15.8	1023.68	C164H262N31O89	1	171.32	19_Ovarian_human_15ug_TR2_240617_f		1023.68	4089.69	1023.68	1	11.15	01Y41Y41M(31M)61M(21Y41L32S)61Y41L	311.21	9	20
P10253_LENLSSSEMGYTATLTR_3_HexNAc(2)Hex(6)	25662	P10253	LENLSSSEMGYTATLTR	N3GlcNAc	3	N2H6F0S0	4	N,7;	7	140	3	2.77526	40.38	17.67	1085.13	C130H216N23O70S1	1	122.73	18_adg_human_15ug_TR2_240615_f	BI2,25AI2,BI2,YI3,	1084.8	3251.38	1084.8	1	1.91	01Y41Y41M(31M21M)61M(31M)61M	311.07	30	90.63
P51884_KLHINHNNLTESVGPLPK_8_HexNAc(5)Hex(6)Fuc(1)	20269	P51884	KLHINHNNLTESVGPLPK	N8GlcNAc	4	N5H6F1S0	0	N,0;	0	127	8	1.46301	31.68	22.24	1037.48	C171H283N32O85	1	93.87	15_bigintes_human_15ug_TR1_240616_f		1037.48	4144.88	1037.48	2	3.56	01Y41Y41M(31M41Y41L31Y41L)61M61Y(31F)41L	311.03	16	44.12
P13473_VASVININPNTTHSTGSCR_10_HexNAc(5)Hex(6)Fuc(1)NeuAc(1)	19558	P13473	VASVININPNTTHSTGSCR	N10GlcNAcC18Cam	3	N5H6F1S1	0	N,3;	3	257	10	1.4879	48.39	26.02	1485.63	C175H291N34O97S1	1	92.95	18_adg_human_15ug_TR3_240615_f		1485.63	4452.86	1485.63	1	10.94	01Y41Y41M(31M41Y41L)61M61Y(31F)41L31Y41L32S	311	21	52.78
P06756_ANTTQPGIVEGGQVLK_2_HexNAc(2)Hex(5)	19635	P06756	ANTTQPGIVEGGQVLK	N2GlcNAc	2	N2H5F0S0	15	N,6;	6	74	2	0.405483	41.8	16.79	1416.16	C115H195N22O59	1	98.07	human_brain_14ug_TR3_0703_f	03AI2,BI1,BII1,BIII1,BI2,02XI1,ZI1,YI1,YI2,BI4,ZI3,YI3,YI4,YII4,YIII3,MH,02XI1,ZI1,YI1,	1415.15	2828.29	1415.15	1	0	01Y41Y41M(31M)61M(31M)61M	310.94	28	83.33
Q14112_IHQNITYQVCR_4_HexNAc(4)Hex(5)Fuc(1)	18339	Q14112	IHQNITYQVCR	N4GlcNAcC10Cam	3	N4H5F1S0	0	N,1;	1	703	4	1.42795	31.53	15.88	1067.79	C129H211N24O67S1	1	89.6	10_Fat_human_15ug_TR2_231011_f		1067.79	3200.36	1067.79	2	3.01	01Y41Y41M(31M41Y(31F)41L)61M61Y41L	310.91	16	70
P16671_NCTSYGVLDISK_1_HexNAc(5)Hex(5)Fuc(1)	24457	P16671	NCTSYGVLDISK	N1GlcNAcC2Cam	3	N5H5F1S0	0	N,1;	1	321	1	1.72616	42.34	16.21	1110.8	C133H219N20O75S1	1	118.06	10_Fat_human_15ug_TR3_231011_f		1110.46	3328.37	1110.46	1	10.18	01Y41Y41M(31M41Y(31F)41L31Y41L)61M61Y	310.87	24	95.45
Q96SK3_KPFECNKCGK_6_HexNAc(3)Hex(5)	15841	Q96SK3	KPFECNKCGK	C5CamN6GlcNAcC8Cam	2	N3H5F0S0	1	N,2;	2	536	6	9.15502	34.08	16.43	1344.56	C107H176N19O56S2	1	74.9	18_adg_human_15ug_TR3_240615_f	23AI3,	1344.56	2687.09	1344.55	1	9.03	01Y41Y41M(31M)(41Y)61M31M21M	310.86	7	27.78
P05166_VASGCLDINSSVK_9_HexNAc(3)Hex(5)	20265	P05166	VASGCLDINSSVK	C5CamN9GlcNAc	2	N3H5F0S0	0	N,3;	3	369	9	4.84013	26.18	11.32	1385.6	C109H186N19O61S1	1	103.14	human_brain_14ug_TR1_0703_f_new		1385.6	2769.18	1385.59	1	6.69	01Y41Y41M(31M)(41Y)61M31M21M	310.26	9	29.17
P12109_NVTAQICIDKK_1_HexNAc(3)Hex(4)NeuAc(1)	18478	P12109	NVTAQICIDKK	N1GlcNAcC7Cam	3	N3H4F0S1	13	N,4;	4	804	1	1.17938	45.7	20.99	947.085	C113H193N20O61S1	1	86.1	17_Prostate_human_15ug_TR3_240619_f	02AI2,BI2,BI1,CI1,35AI4,02AI4,BI2,03AI5,35AI3,BI3,35AI5,YI5,YI6,	947.085	2838.23	947.084	1	38.16	01Y41Y41M(31M)61M61Y41L32S	310.1	22	95
P05556_CHEGNGTFECGACR_5_HexNAc(4)Hex(5)NeuAc(2)	13215	P05556	CHEGNGTFECGACR	C1CamN5GlcNAcC10CamC13Cam	3	N4H5F0S2	0	N,2;	2	481	5	1.301	44.52	29.98	1287.47	C147H232N29O85S3	1	60.15	17_Prostate_human_15ug_TR1_240619_f		1287.8	3859.39	1287.8	1	19.07	01Y41Y41M(31M41Y41L32S)61M61Y41L32S	310.08	24	80.77
P05305_KCWNFCQAGK_4_HexNAc(2)Hex(5)	14288	P05305	KCWNFCQAGK	C2CamN4GlcNAcC6Cam	3	N2H5F0S0	16	N,2;	2	121	4	1.47764	49.81	20.59	839.341	C102H160N19O50S2	1	74.92	13_Heart_human_10ug_TR1_231111_f	BI1,BII1,BIII1,BI2,YI1,YI2,YI3,02XI1,ZI1,YI1,ZI2,YI2,YI3,YI4,YII4,YIII3,02XI1,ZI1,YI1,YI2,	839.341	2515	839.339	1	0	01Y41Y41M(31M)61M(31M)61M	309.75	11	50
Q7Z388_GVYELTHNNK_9_HexNAc(2)Hex(6)	13794	Q7Z388	GVYELTHNNK	N9GlcNAc	3	N2H6F0S0	3	N,7;	7	123	9	2.26916	46.38	18.22	852.028	C103H166N17O57	2	64.84	18_adg_human_15ug_TR2_240615_f	BI2,CI2,YI3,	852.028	2553.06	852.027	1	0	01Y41Y41M(31M21M)61M(31M)61M	309.69	23	116.67
Q12931_EVFIRELISNASDALEK_10_HexNAc(5)Hex(5)NeuAc(1)	35357	Q12931	EVFIRELISNASDALEK	N10GlcNAc	4	N5H5F0S1	0	N,1;	1	119	10	3.92401	57.35	18.82	1013.71	C166H273N28O87	1	176.57	11_Spleen_human_15ug_TR1_231108_f		1013.96	4050.78	1013.95	1	20.43	01Y41Y41M(31M41Y)61M61Y41L31Y41L32S	309.29	6	15.63
O75888_QHSVLHLVPINATSK_11_HexNAc(2)Hex(7)	22256	O75888	QHSVLHLVPINATSK	N11GlcNAc	3	N2H7F0S0	3	N,1;	1	124	11	0.689565	34.84	11.23	1062.49	C131H219N24O66	1	110.65	human_brain_14ug_TR3_0703_f	BI2,YI3,YI3,	1062.49	3184.45	1062.49	1	4.74	01Y41Y41M(31M21M)61M(31M21M)61M	309.14	8	25
P32780_LNVNATDSSSTSNHK_4_HexNAc(2)Hex(5)	20782	P32780	LNVNATDSSSTSNHK	N4GlcNAc	3	N2H5F0S0	16	N,2;	2	150	4	-0.743459	31.89	12.09	931.394	C108H180N23O62	1	104.58	human_brain_14ug_TR2_0703_f	BI1,BII1,BIII1,BI2,YI2,YI3,02XI1,YI4,YII4,YIII3,ZI1,YI1,ZI2,YI2,ZI3,YI3,YI4,YII4,YIII3,02XI1,ZI1,YI1,	931.393	2791.16	931.394	1	0	01Y41Y41M(31M)61M(31M)61M	309.11	7	17.86
P02790_ALPQPQNVTSLLGCTH_7_HexNAc(4)Hex(6)Fuc(1)NeuAc(1)	31224	P02790	ALPQPQNVTSLLGCTH	N7GlcNAcC14Cam	3	N4H6F1S1	0	N,3;	3	453	7	5.05699	36.58	17.77	1320.57	C159H262N27O86S1	1	146.97	20_Oesophagus_human_15ug_TR3_240618_f		1320.57	3957.67	1320.56	1	1.92	01Y41Y41M(31M(21Y(31F)41L32S)41Y41L)61M61M	309.07	28	83.33
Q05397_NVLVSSNDCVK_7_HexNAc(2)Hex(8)	11167	Q05397	NVLVSSNDCVK	N7GlcNAcC9Cam	2	N2H8F0S0	0	N,1;	1	557	7	-2.23037	51.63	16.64	1469.6	C114H194N17O69S1	1	51.87	16_Pancreas_human_15ug_TR3_240614_f		1469.6	2937.19	1469.6	1	9.64	01Y41Y41M(31M21M21M)61M(31M21M)61M	308.94	10	30
Q13683_KNITLDCAR_2_HexNAc(3)Hex(6)	13933	Q13683	KNITLDCAR	N2GlcNAcC7Cam	3	N3H6F0S0	22	N,2;	2	989	2	-0.911027	55.36	25.4	891.713	C104H179N18O60S1	1	63.68	17_Prostate_human_15ug_TR1_240619_f	BI1,BII1,BIII1,BI2,BIII2,CIII2,BI2,BIII3,CIII3,02XI1,ZI1,YI1,02XI2,ZI2,YI2,ZIII3,YIII3,24XIII4,ZIII4,YIII4,02XI1,ZI1,YI1,YI2,	891.713	2672.12	891.714	1	0	01Y41Y41M(31M41Y41L)61M(31M)61M	308.8	19	100
Q9H2Y7_STFGSQKQSGDNLNDTLR_14_HexNAc(3)Hex(5)	19879	Q9H2Y7	STFGSQKQSGDNLNDTLR	N14GlcNAc	3	N3H5F0S0	0	N,0;	0	532	14	-0.883736	47.35	16.85	1130.15	C134H220N29O72	1	99.16	human_brain_14ug_TR3_0703_f		1130.15	3387.44	1130.15	2	15.73	01Y41Y41M(31M)(41Y)61M31M21M	308.74	6	17.65
Q12841_GSNYSEILDK_3_HexNAc(2)Hex(8)	19726	Q12841	GSNYSEILDK	N3GlcNAc	2	N2H8F0S0	1	N,5;	5	144	3	-0.0157292	47.43	17.33	1415.07	C112H183N14O69	1	93.93	18_adg_human_15ug_TR1_240615_f	35AI3,	1415.07	2828.12	1415.07	1	6.91	01Y41Y41M(31M21M21M)61M(31M21M)61M	308.71	22	100
P21810_LLQVVYLHSNNITK_11_HexNAc(5)Hex(5)Fuc(1)	26301	P21810	LLQVVYLHSNNITK	N11GlcNAc	3	N5H5F1S0	0	N,7;	7	311	11	2.84565	38.27	18.22	1205.56	C151H250N25O75	1	133.85	12_Tetis_human_8ug_TR1_231109_f		1205.56	3613.65	1205.56	1	3.95	01Y41Y41M(31M41Y(31F)41L31Y)61M61Y41L	308.65	27	96.15
P00738_VVLHPNYSQVDIGLIK_6_HexNAc(5)Hex(6)NeuAc(3)	30893	P00738	VVLHPNYSQVDIGLIK	N6GlcNAc	3	N5H6F0S3	0	N,8;	8	241	6	2.60642	40.93	23.66	1553.35	C192H312N29O102	1	146.63	19_Ovarian_human_15ug_TR1_240617_f		1553.35	4656.01	1553.34	1	17.54	01Y41Y41M(31M41Y41L32S)61M(21Y41L32S)61Y41L32S	308.57	27	83.33
P11117_KNLTLMATTSQLPK_2_HexNAc(2)Hex(9)	22517	P11117	KNLTLMATTSQLPK	N2GlcNAc	3	N2H9F0S0	0	N,7;	7	267	2	0.136127	53.55	21.41	1137.84	C137H237N20O76S1	1	107.53	18_adg_human_15ug_TR2_240615_f		1137.84	3410.5	1137.84	1	4.41	01Y41Y41M(31M21M21M31G)61M(31M21M)61M	308.49	27	100
P01857_TKPREEQYNSTYR_9_HexNAc(4)Hex(3)	10905	P01857	TKPREEQYNSTYR	N9GlcNAc	3	N4H3F0S0	0	N,0;	0	180	9	-0.0270572	57.54	20.5	991.101	C121H193N26O60	1	50.16	15_bigintes_human_15ug_TR1_240616_f		991.101	2970.29	991.101	1	59.05	01Y41Y41M(31M41Y)61M61Y	307.69	10	33.33
Q13637_VHLPNGSPIPAVLLANK_16_HexNAc(2)Hex(7)	25578	Q13637	VHLPNGSPIPAVLLANK	N16GlcNAc	4	N2H7F0S0	4	N,1;	1	143	16	0.244101	39.82	15.19	821.143	C138H231N24O66	1	123.93	02_RE_Liver_human_15ug_TR2_240613_f	03AI4,YI3,ZI3,YI3,	821.143	3280.55	821.143	2	0	01Y41Y41M(31M)61M(31M21M)61M21M	307.67	7	18.75
P12111_GPPGVNGTQGFQGCPGQR_6_HexNAc(4)Hex(5)Fuc(1)	18203	P12111	GPPGVNGTQGFQGCPGQR	N6GlcNAcC14Cam	3	N4H5F1S0	0	N,1;	1	2079	6	2.16213	37.68	25.84	1195.17	C143H229N30O74S1	1	84.41	17_Prostate_human_15ug_TR2_240619_f		1195.17	3582.48	1195.17	2	2.41	01Y41Y41M(31M41Y(31F)41L)61M61Y41L	307.57	29	76.47
Q16586_VDWCNVTLVDK_5_HexNAc(2)Hex(6)	27620	Q16586	VDWCNVTLVDK	C4CamN5GlcNAc	2	N2H6F0S0	4	N,9;	9	246	5	3.72363	48.6	17.16	1364.58	C111H180N17O59S1	1	140.94	14_Muscle_human_10ug_TR3_231113_f	CI2,BI2,YI3,YI3,	1364.58	2727.13	1364.57	1	6.2	01Y41Y41M(31M21M)61M(31M)61M	307.56	25	115
P21810_LLQVVYLHSNNITK_11_HexNAc(4)Hex(6)Fuc(2)NeuAc(1)	27393	P21810	LLQVVYLHSNNITK	N11GlcNAc	3	N4H6F2S1	2	N,7;	7	311	11	5.39465	31.38	16.22	1337.61	C166H274N25O87	1	127.86	17_Prostate_human_15ug_TR1_240619_f	YII3,YII3,	1337.94	4009.78	1337.93	1	7.07	01Y41Y41M(31M(21Y(31F)41L32S)41Y(31F)41L)61M61M	307.51	28	100
P05186_HSHFIWNR_7_HexNAc(4)Hex(5)NeuAc(2)	20169	P05186	HSHFIWNR	N7GlcNAc	3	N4H5F0S2	0	N,4;	4	271	7	0.602518	35.54	15.55	1101.78	C135H206N23O72	1	95.99	18_adg_human_15ug_TR3_240615_f		1101.45	3301.32	1101.44	1	10.09	01Y41Y41M(31M)61M(21Y41L32S)61Y41L32S	307.37	14	85.71
P02751_LDAPTNLQFVNETDSTVLVR_11_HexNAc(4)Hex(6)Fuc(1)NeuAc(1)	32521	P02751	LDAPTNLQFVNETDSTVLVR	N11GlcNAc	3	N4H6F1S1	0	N,6;	6	1007	11	5.26306	42.96	24.33	1485.99	C182H298N31O96	2	154.22	17_Prostate_human_15ug_TR3_240619_f		1485.99	4453.94	1485.99	1	15.35	01Y41Y41M(31M(21Y(31F)41L32S)41Y41L)61M61M	307.23	29	71.05
P98160_NQELEDNVHISPNGSIITIVGTRPSNHGTYR_13_HexNAc(4)Hex(5)Fuc(1)NeuAc(1)	28025	P98160	NQELEDNVHISPNGSIITIVGTRPSNHGTYR	N13GlcNAc	5	N4H5F1S1	0	N,0;	0	3072	13	2.10288	32.25	19.69	1097.1	C224H362N51O107	2	134.21	18_adg_human_15ug_TR2_240615_f		1096.9	5478.45	1096.9	1	5.59	01Y41Y41M(31M)61M(21Y41L32S)61Y(31F)41L	307.19	17	28.33
Q9H3G5_QAIHVGNQTFNDGTIVEK_7_HexNAc(2)Hex(5)	22751	Q9H3G5	QAIHVGNQTFNDGTIVEK	N7GlcNAc	3	N2H5F0S0	16	N,3;	3	346	7	1.11814	24.78	11.79	1063.48	C131H212N27O64	1	108.6	18_adg_human_15ug_TR1_240615_f	BI1,BII1,BIII1,BI2,03AI2,CI2,24AI4,ZI1,YI1,ZI2,YI2,YI3,02XI1,YI1,ZI2,YI2,ZI3,YI3,	1063.48	3187.42	1063.48	1	0	01Y41Y41M(31M)61M(31M)61M	307.13	23	64.71
Q9UL01_FLEVIANASGYMYETSYR_7_HexNAc(3)Hex(5)	29248	Q9UL01	FLEVIANASGYMYETSYR	N7GlcNAc	3	N3H5F0S0	0	N,1;	1	183	7	6.69782	31.83	14	1179.18	C150H230N25O70S1	1	141.93	02_RE_Liver_human_15ug_TR1_240613_f		1178.84	3533.49	1178.84	1	19.86	01Y41Y41M(31M)(41Y)61M31M21M	306.89	7	20.59
Q9BXN1_ITDIENGSLANIPR_6_HexNAc(4)Hex(5)Fuc(1)NeuAc(1)	27032	Q9BXN1	ITDIENGSLANIPR	N6GlcNAc	3	N4H5F1S1	0	N,3;	3	282	6	3.1042	34.12	20.75	1191.85	C143H239N24O80	1	130.37	10_Fat_human_15ug_TR2_231011_f		1191.86	3572.54	1191.85	2	1.1	01Y41Y41M(31M)61M(21Y41L32S)61Y(31F)41L	306.81	26	84.62
Q9C0A6_GEPSPTWESNITEK_10_HexNAc(2)Hex(5)	20307	Q9C0A6	GEPSPTWESNITEK	N10GlcNAc	3	N2H5F0S0	16	N,1;	1	1204	10	1.93862	29.35	11.42	931.395	C114H180N19O61	1	103.34	human_brain_14ug_TR1_0703_f_new	BI1,BII1,BIII1,BI2,YI2,YI3,15XI1,ZI1,YI1,ZI2,YI2,ZI3,YI3,YI4,YII4,YIII3,02XI1,ZI1,YI1,YI2,	931.393	2791.16	931.392	1	0	01Y41Y41M(31M)61M(31M)61M	306.76	6	15.38
P51884_LHINHNNLTESVGPLPK_7_HexNAc(5)Hex(6)Fuc(1)	23218	P51884	LHINHNNLTESVGPLPK	N7GlcNAc	4	N5H6F1S0	0	N,9;	9	127	7	1.26214	34.55	27.06	1005.2	C165H271N30O84	1	109.15	17_Prostate_human_15ug_TR3_240619_f		1005.45	4016.79	1005.45	1	2.54	01Y41Y41M(31M41Y41L31Y41L)61M61Y(31F)41L	306.37	24	68.75
Q9BU23_SANSTLAQALHWTR_3_HexNAc(2)Hex(7)	27525	Q9BU23	SANSTLAQALHWTR	N3GlcNAc	3	N2H7F0S0	3	N,1;	1	616	3	3.85096	36.26	12.94	1033.46	C125H203N24O66	1	131.72	18_adg_human_15ug_TR1_240615_f	35AI3,YI3,YI3,	1033.12	3096.33	1033.11	1	4.21	01Y41Y41M(31M)61M(31M21M)61M21M	306.25	21	73.08
Q96DB2_YNITFMGLEK_2_HexNAc(2)Hex(8)	12947	Q96DB2	YNITFMGLEK	N2GlcNAc	3	N2H8F0S0	2	N,2;	2	25	2	2.79696	48.33	15.36	973.739	C120H193N14O66S1	1	60.65	18_adg_human_15ug_TR2_240615_f	ZI3,YI3,	973.739	2918.19	973.736	1	2.4	01Y41Y41M(31M21M)61M(31M21M)61M21M	306.25	7	27.78
P02765_VCQDCPLLAPLNDTR_12_HexNAc(4)Hex(6)Fuc(1)NeuAc(1)	29978	P02765	VCQDCPLLAPLNDTR	C2CamC5CamN12GlcNAc	3	N4H6F1S1	0	N,7;	7	156	12	5.54658	39.99	17.13	1332.56	C158H262N27O87S2	2	141.61	21_Bladder_human_15ug_TR3_240619_f		1332.56	3993.63	1332.55	1	16.43	01Y41Y41M(31M(21Y(31F)41L32S)41Y41L)61M61M	306.13	27	85.71
Q6UWL2_INDVSLFNDTCVR_8_HexNAc(2)Hex(5)	20629	Q6UWL2	INDVSLFNDTCVR	N8GlcNAcC11Cam	2	N2H5F0S0	16	N,1;	1	308	8	7.18934	31.31	10.69	1385.6	C111H182N21O58S1	1	103.84	human_brain_14ug_TR2_0703_f	BI1,BII1,BIII1,CI1,CII1,CIII1,BI2,ZI1,YI1,ZI2,YI2,BI4,ZI3,YI3,YI4,YII4,YIII3,MH,02XI1,ZI1,YI1,YI2,	1385.6	2769.17	1385.59	1	0	01Y41Y41M(31M)61M(31M)61M	306.08	9	25
Q9H3G5_QAIHVGNQTFNDGTIVEK_7_HexNAc(2)Hex(4)	22809	Q9H3G5	QAIHVGNQTFNDGTIVEK	N7GlcNAc	3	N2H4F0S0	19	N,6;	6	346	7	2.06	30.36	13.77	1009.46	C125H202N27O59	1	108.89	18_adg_human_15ug_TR1_240615_f	01AII2,BI1,BII1,BII2,02AI3,15AII2,01AII2,BII2,BI2,24AI3,ZI1,YI1,ZI2,YI2,BI3,YII3,YI1,YI2,YII3,YI3,YII4,	1009.46	3025.36	1009.46	1	0	01Y41Y41M(31M21M)61M	305.95	26	73.53
Q9HC10_NEMLEIQVFNYSK_10_HexNAc(2)Hex(6)	24600	Q9HC10	NEMLEIQVFNYSK	N10GlcNAc	3	N2H6F0S0	3	N,1;	1	68	10	3.48764	37.17	11.99	998.763	C124H198N19O63S1	1	117.5	04_Stomach_human_15ug_TR2_240614_f	CI2,BI2,YI3,	998.763	2993.26	998.759	1	6.75	01Y41Y41M(31M)61M(31M21M)61M	305.93	7	20.83
Q07954_NSTTLVMHMK_1_HexNAc(2)Hex(9)	17257	Q07954	NSTTLVMHMK	N1GlcNAc	3	N2H9F0S0	1	N,3;	3	1825	1	-0.297426	54.46	22.38	1009.74	C118H201N16O70S2	1	82.59	02_RE_Liver_human_15ug_TR1_240613_f	45AI3,	1009.74	3026.21	1009.74	1	2.34	01Y41Y41M(31M21M21M)61M(31M21M)61M21M	305.93	22	105.56
Q9UPQ0_SNQTAYVPAPLRK_2_HexNAc(2)Hex(4)	25526	Q9UPQ0	SNQTAYVPAPLRK	N2GlcNAc	3	N2H4F0S0	20	N,2;	2	275	2	4.33965	38.49	12.01	834.064	C104H172N21O49	1	122.05	18_adg_human_15ug_TR2_240615_f	01AII2,BI1,BII1,BII2,BI2,04AI2,13AII2,CI2,BII2,BI2,YI2,02XI1,ZI1,YI1,BI3,ZI2,YI2,ZII3,YII3,02XI1,ZI1,YI1,	834.063	2499.16	834.06	1	0	01Y41Y41M(31M21M)61M	305.9	8	25
A0AVI2_TANVDLVDDNLSR_10_HexNAc(2)Hex(9)	17770	A0AVI2	TANVDLVDDNLSR	N10GlcNAc	3	N2H9F0S0	0	N,2;	2	1739	10	4.96762	50.02	16.74	1100.13	C128H215N20O79	1	85.08	02_RE_Liver_human_15ug_TR3_240613_f		1099.79	3296.34	1099.79	1	4.72	01Y41Y41M(31M21M21M)61M(31M21M)61M21M	305.81	9	25
P07711_YSVANDTGFVDIPKQEK_5_HexNAc(2)Hex(5)	23743	P07711	YSVANDTGFVDIPKQEK	N5GlcNAc	3	N2H5F0S0	13	N,2;	2	221	5	-0.394038	36.81	12.82	1043.46	C131H208N23O64	1	113.44	18_adg_human_15ug_TR2_240615_f	BI1,BII1,BIII1,BI2,02AI3,YI1,YI2,YI3,02XI1,ZI1,YI1,YI2,YI3,YI4,YII4,YIII3,YI1,	1043.46	3127.37	1043.46	1	0	01Y41Y41M(31M)61M(31M)61M	305.44	25	75
P02751_HEEGHMLNCTCFGQGR_8_HexNAc(3)Hex(3)	17735	P02751	HEEGHMLNCTCFGQGR	N8GlcNAcC9CamC11Cam	3	N3H3F0S0	7	N,3;	3	542	8	0.766809	31.11	12.94	1010.07	C119H187N30O56S3	1	82.13	15_bigintes_human_15ug_TR1_240616_f	BI1,02AI2,BI2,CI2,YI3,YI3,YI4,	1010.4	3028.19	1010.4	1	40.07	01Y41Y41M(31M)61M61Y	305.18	20	63.33
Q07954_WTGHNVTVVQR_5_HexNAc(4)Hex(5)Fuc(1)	16566	Q07954	WTGHNVTVVQR	N5GlcNAc	3	N4H5F1S0	0	N,2;	2	1511	5	1.08598	38.91	26.44	1023.12	C125H202N23O65	1	76.38	17_Prostate_human_15ug_TR2_240619_f		1022.78	3065.32	1022.78	2	0.5	01Y41Y41M(31M41Y(31F)41L)61M61Y41L	305.07	15	60
P23141_NATSYPPMCTQDPK_1_HexNAc(2)Hex(8)	15512	P23141	NATSYPPMCTQDPK	N1GlcNAcC9Cam	3	N2H8F0S0	1	N,6;	6	79	1	0.746355	33.27	17.97	1105.43	C131H211N20O74S2	3	73.34	18_adg_human_15ug_TR2_240615_f	YI3,	1105.1	3312.28	1105.1	1	0	01Y41Y41M(31M21M)61M(31M21M)61M21M	305.05	26	88.46
O14773_FLSSSPHLPPSSYFNASGR_15_HexNAc(2)Hex(3)Fuc(1)	26341	O14773	FLSSSPHLPPSSYFNASGR	N15GlcNAc	3	N2H3F1S0	8	N,7;	7	443	15	-0.0541222	26.04	14.79	1030.8	C133H202N27O57	1	126.02	18_adg_human_15ug_TR3_240615_f	BI1,BII1,BI2,BI3,02XI1,ZI1,YI1,YI2,YI3,YII3,	1030.8	3089.37	1030.8	1	0	01Y(61F)41Y41M(31M)61M	304.99	27	72.22
Q7L8W6_VENVCKR_3_HexNAc(2)Hex(6)	17269	Q7L8W6	VENVCKR	N3GlcNAcC5Cam	2	N2H6F0S0	4	N,1;	1	128	3	-2.07599	69.81	15.31	1142.47	C88H152N15O52S1	2	81.84	18_adg_human_15ug_TR3_240615_f	CI2,BI2,YI3,YI3,	1142.47	2282.94	1142.48	1	0	01Y41Y41M(31M21M)61M(31M)61M	304.98	8	33.33
P56199_SENASLVLSSSNQK_3_HexNAc(2)Hex(8)	17657	P56199	SENASLVLSSSNQK	N3GlcNAc	3	N2H8F0S0	3	N,4;	4	1113	3	0.359971	45.01	19.88	1056.78	C123H209N20O75	1	82.08	17_Prostate_human_15ug_TR3_240619_f	02AI3,01AI3,YI3,	1056.44	3166.32	1056.44	1	2.16	01Y41Y41M(31M21M)61M(31M21M)61M21M	304.86	28	96.15
Q9BTY2_SQNDTVTPDVWYTSKPK_3_HexNAc(2)Hex(7)	21701	Q9BTY2	SQNDTVTPDVWYTSKPK	N3GlcNAc	3	N2H7F0S0	5	N,5;	5	377	3	1.41424	31.34	15.67	1170.17	C145H229N24O75	1	103.62	18_adg_human_15ug_TR1_240615_f	45AI3,CI3,04AI4,YI3,YI3,	1169.84	3506.48	1169.83	2	23.07	01Y41Y41M(31M)61M(31M21M)61M21M	304.82	24	71.88
P12110_NMTLFSDLVAEK_1_HexNAc(4)Hex(5)Fuc(1)	34199	P12110	NMTLFSDLVAEK	N1GlcNAc	3	N4H5F1S0	0	N,4;	4	785	1	1.8735	31.66	19.3	1047.12	C128H211N18O69S1	1	163.99	10_Fat_human_15ug_TR3_231011_f		1046.45	3136.33	1046.45	2	2.69	01Y41Y41M(31M)61M(21Y(31F)41L)61Y41L	304.81	26	104.55
Q9UHP3_EITGINDTQILQQALK_6_HexNAc(2)Hex(7)	33509	Q9UHP3	EITGINDTQILQQALK	N6GlcNAc	3	N2H7F0S0	3	N,2;	2	31	6	3.25676	37.8	14.96	1109.51	C135H230N23O72	1	170.91	human_intestine_14ug_TR2_0704_f_new	YI3,ZI3,YI3,	1109.51	3325.5	1109.51	1	2.31	01Y41Y41M(31M)61M(31M21M)61M21M	304.7	11	30
P56199_NTTFNVESTKK_1_HexNAc(2)Hex(6)	12498	P56199	NTTFNVESTKK	N1GlcNAc	3	N2H6F0S0	4	N,2;	2	418	1	0.777424	47.19	27.39	883.382	C106H176N17O60	1	57.7	15_bigintes_human_15ug_TR1_240616_f	BI2,BI2,ZI3,YI3,	883.382	2647.12	883.381	1	12.56	01Y41Y41M(31M21M)61M(31M)61M	304.64	17	70
P08123_LLANYASQNITYHCK_9_HexNAc(2)Hex(6)	20804	P08123	LLANYASQNITYHCK	N9GlcNAcC14Cam	3	N2H6F0S0	3	N,4;	4	1267	9	1.25534	40.71	20.75	1059.46	C131H209N24O64S1	1	98.9	19_Ovarian_human_15ug_TR3_240617_f	BI2,YI3,YI3,	1059.13	3174.36	1059.12	1	14.05	01Y41Y41M(31M)61M(31M21M)61M	304.6	24	78.57
P01877_TPLTANITK_6_HexNAc(2)Hex(7)	14565	P01877	TPLTANITK	N6GlcNAc	2	N2H7F0S0	3	N,10;	10	205	6	2.80177	50.83	18.2	1250.05	C100H172N13O59	1	72.03	15_bigintes_human_15ug_TR3_240616_f	BI2,BIII3,YI3,YIII3,YI3,YIII3,	1250.55	2499.09	1250.55	1	4.67	01Y41Y41M(31M21M21M)61M(31M)61M	304.54	23	125
P16671_NCTSYGVLDISK_1_HexNAc(4)Hex(5)Fuc(1)NeuAc(1)	25675	P16671	NCTSYGVLDISK	N1GlcNAcC2Cam	3	N4H5F1S1	0	N,3;	3	321	1	0.128881	39.89	14.65	1140.14	C136H223N20O78S1	1	123.73	10_Fat_human_15ug_TR3_231011_f		1139.8	3416.38	1139.8	1	0.92	01Y41Y41M(31M)61M(21Y(31F)41L32S)61Y41L	303.96	25	100
Q9NVU0_LMDKQTFCSSQTTSNTSR_15_HexNAc(2)Hex(8)	17930	Q9NVU0	LMDKQTFCSSQTTSNTSR	C8CamN15GlcNAc	4	N2H8F0S0	5	N,2;	2	110	15	3.39257	29.11	11.63	949.64	C147H245N28O83S2	2	85.15	04_Stomach_human_15ug_TR1_240614_f	25AI3,03AI4,04AI4,YI3,YI3,	949.892	3794.53	949.888	1	4.22	01Y41Y41M(31M21M)61M(31M21M)61M21M	303.86	7	17.65
P02751_RHEEGHMLNCTCFGQGR_9_HexNAc(3)Hex(4)	16001	P02751	RHEEGHMLNCTCFGQGR	N9GlcNAcC10CamC12Cam	4	N3H4F0S0	3	N,1;	1	542	9	1.03785	36.78	13.62	837.842	C131H209N34O62S3	1	78.58	15_bigintes_human_15ug_TR2_240616_f	BI3,YI3,YI3,	837.593	3346.34	837.592	1	23.23	01Y41Y41M(31M)61M61Y41L	303.8	17	53.13
P02790_CSDGWSFDATTLDDNGTMLFFK_15_HexNAc(4)Hex(5)NeuAc(2)	40385	P02790	CSDGWSFDATTLDDNGTMLFFK	C1CamN15GlcNAc	3	N4H5F0S2	0	N,8;	8	64	15	2.23231	44.35	26.36	1579.29	C195H295N32O99S2	1	193.84	19_Ovarian_human_15ug_TR1_240617_f		1578.96	4732.85	1578.96	1	2.87	01Y41Y41M(31M)61M(21Y41L32S)61Y41L32S	303.54	32	73.81
Q66GS9_LQLELNLCQK_6_HexNAc(4)Hex(3)Fuc(1)	19062	Q66GS9	LQLELNLCQK	N6GlcNAcC8Cam	3	N4H3F1S0	0	N,1;	1	373	6	6.01304	48.13	19.1	902.084	C110H188N19O56S1	1	91.4	16_Pancreas_human_15ug_TR2_240614_f		902.084	2703.22	902.078	2	19.13	01Y41Y41M(31M41Y31F)61M61Y	303.46	8	27.78
P98160_NQELEDNVHISPNGSIITIVGTRPSNHGTYR_13_HexNAc(4)Hex(4)Fuc(1)	29007	P98160	NQELEDNVHISPNGSIITIVGTRPSNHGTYR	N13GlcNAc	5	N4H4F1S0	5	N,0;	0	3072	13	1.64428	28.17	12.88	1006.27	C207H335N50O94	1	135.7	17_Prostate_human_15ug_TR1_240619_f	BI2,BI2,YI3,ZI3,YI3,	1006.27	5025.3	1006.27	1	9.94	01Y(61F)41Y41M(31M)61M(21Y41L)61Y	302.93	18	30
Q9HCK8_DGNITGIQQFSKK_3_HexNAc(2)Hex(9)	21856	Q9HCK8	DGNITGIQQFSKK	N3GlcNAc	3	N2H9F0S0	0	N,2;	2	1291	3	0.1037	36.45	13	1101.47	C132H219N20O76	1	105.37	02_RE_Liver_human_15ug_TR1_240613_f		1101.14	3300.39	1101.14	1	6.94	01Y41Y41M(31M21M21M)61M(31M21M)61M21M	302.93	8	20.83
O94856_VILYNR_5_HexNAc(2)Hex(5)	14569	O94856	VILYNR	N5GlcNAc	2	N2H5F0S0	15	N,4;	4	446	5	-0.293899	78.39	13.61	997.446	C82H137N12O44	1	76.66	human_brain_14ug_TR1_0703_f_new	BI1,BII1,BIII1,BI2,YI1,ZI2,YI2,ZI3,YI3,02XI1,YI4,YII4,YIII3,ZI1,YI1,BI4,ZI2,YI2,YI3,	997.446	1993.89	997.446	1	0	01Y41Y41M(31M)61M(31M)61M	302.76	12	100
Q9BVK6_FTFTSHTPGEHQICLHSNSTK_18_HexNAc(4)Hex(3)Fuc(1)	22588	Q9BVK6	FTFTSHTPGEHQICLHSNSTK	C14CamN18GlcNAc	5	N4H3F1S0	5	N,7;	7	125	18	3.20255	26.69	12.54	775.943	C161H250N35O73S1	1	112.89	11_Spleen_human_15ug_TR3_231108_f	BI2,CI2,45AI3,YI3,YI3,	775.943	3873.66	775.94	1	18.92	01Y41Y41M(31M)61M(21Y31F)61Y	302.64	25	62.5
P23229_ANHSGAVVLLK_2_HexNAc(5)Hex(5)Fuc(1)	16407	P23229	ANHSGAVVLLK	N2GlcNAc	3	N5H5F1S0	0	N,7;	7	323	2	-0.415779	59.8	27.98	1027.79	C125H211N20O68	1	84.83	human_kidney_9ug_TR3_0701_f		1027.79	3080.37	1027.79	2	2.44	01Y41Y41M(31M41Y41L31Y(31F)41L)61M61Y	302.45	26	120
P09884_SGFGERNATCGR_7_HexNAc(3)Hex(3)	15537	P09884	SGFGERNATCGR	N7GlcNAcC10Cam	3	N3H3F0S0	9	N,1;	1	683	7	-6.97348	53.12	15.83	803.329	C93H152N23O49S1	1	72.58	20_Oesophagus_human_15ug_TR3_240618_f	BI1,CI1,02AI2,BI2,CI2,ZI3,YI3,ZI4,YI4,	803.328	2406.98	803.334	1	48.78	01Y41Y41M(31M)61M61Y	302.37	9	27.27
Q9Y4L1_VINETWAWK_3_HexNAc(2)Hex(7)	25903	Q9Y4L1	VINETWAWK	N3GlcNAc	2	N2H7F0S0	3	N,8;	8	862	3	0.668634	46.52	13.7	1344.57	C113H176N15O59	2	123.88	18_adg_human_15ug_TR1_240615_f	CI2,CIII3,BI2,BIII3,YI3,YIII3,	1344.57	2687.12	1344.57	2	0	01Y41Y41M(31M21M21M)61M(31M)61M	302.01	23	125
Q9P0L1_THTGEKPYKCNDCGK_11_HexNAc(2)Hex(3)	25440	Q9P0L1	THTGEKPYKCNDCGK	C10CamN11GlcNAcC13Cam	3	N2H3F0S0	14	N,0;	0	694	11	5.08162	33.82	10.41	896.712	C107H172N25O51S2	1	129.58	12_Tetis_human_8ug_TR1_231109_f	BI1,BII1,BI2,03AI2,CI2,YI1,BI3,YI2,02XI1,ZI1,YI1,ZI2,YI2,YI3,YII3,YI1,	896.713	2687.11	896.709	1	0	01Y41Y41M(31M)61M	301.91	6	17.86
P11279_LLNINPNK_7_HexNAc(2)Hex(5)	19793	P11279	LLNINPNK	N7GlcNAc	2	N2H5F0S0	14	N,6;	6	261	7	1.77467	62.05	17.52	1071.49	C87H149N14O47	1	101.82	12_Tetis_human_8ug_TR2_231109_f	BI1,BII1,BIII1,BI2,YI1,02XI2,YI2,YI3,YI4,YII4,YIII3,02XI1,BI4,ZI1,YI1,ZI2,YI2,YI3,	1071.99	2141.97	1071.99	1	0	01Y41Y41M(31M)61M(31M)61M	301.83	20	128.57
Q685J3_TVLDNATEVVKEK_5_HexNAc(2)Hex(6)	28442	Q685J3	TVLDNATEVVKEK	N5GlcNAc	3	N2H6F0S0	4	N,2;	2	4267	5	1.21626	39.66	17.4	942.428	C114H195N18O63	1	145.15	13_Heart_human_10ug_TR1_231111_f	BI2,YI3,ZI3,YI3,	942.427	2824.26	942.426	1	11.7	01Y41Y41M(31M)61M(31M21M)61M	301.69	9	25
Q96G23_LWLPVNLTWADLEDRDGR_6_HexNAc(2)Hex(6)	38750	Q96G23	LWLPVNLTWADLEDRDGR	N6GlcNAc	3	N2H6F0S0	4	N,1;	1	19	6	-1.08231	46.28	17.07	1183.87	C150H236N29O69	2	187.34	18_adg_human_15ug_TR1_240615_f	BI2,BI2,YI3,YI3,	1183.53	3547.58	1183.53	1	0	01Y41Y41M(31M21M)61M(31M)61M	301.57	15	44.12
P05783_IVDGKVVSETNDTK_11_HexNAc(2)Hex(8)	11156	P05783	IVDGKVVSETNDTK	N11GlcNAc	3	N2H8F0S0	2	N,2;	2	423	11	0.288918	45.3	17.22	1070.13	C127H216N19O75	1	52.02	02_RE_Liver_human_15ug_TR3_240613_f	YI3,YI3,	1070.13	3207.37	1070.13	1	12.07	01Y41Y41M(31M21M)61M(31M21M)61M21M	301.57	8	23.08
P05106_NFSIQVR_1_HexNAc(2)Hex(5)	22465	P05106	NFSIQVR	N1GlcNAc	2	N2H5F0S0	15	N,2;	2	125	1	3.86821	58.82	10.4	1040.96	C84H139N14O46	1	112.73	11_Spleen_human_15ug_TR2_231108_f	BI1,BII1,BIII1,CI2,BI2,YI1,ZI2,YI2,YI3,02XI1,YI4,YII4,YIII3,BI4,ZI1,YI1,ZI2,YI2,YI3,	1040.46	2079.9	1040.45	1	0	01Y41Y41M(31M)61M(31M)61M	301.57	15	108.33
Q9BXN1_ITDIENGSLANIPR_6_HexNAc(4)Hex(4)Fuc(1)	26466	Q9BXN1	ITDIENGSLANIPR	N6GlcNAc	3	N4H4F1S0	0	N,3;	3	282	6	-0.447844	40.64	15.91	1040.8	C126H212N23O67	1	127.69	10_Fat_human_15ug_TR2_231011_f		1040.8	3119.39	1040.8	2	1.72	01Y41Y41M(31M)61M(21Y(31F)41L)61Y	301.17	23	76.92
Q8N3C0_YLNSTLKEMTEVPR_3_HexNAc(2)Hex(9)	17188	Q8N3C0	YLNSTLKEMTEVPR	N3GlcNAc	4	N2H9F0S0	2	N,1;	1	232	3	4.04045	36.95	22.05	887.385	C143H238N21O79S1	1	88.63	human_kidney_9ug_TR3_0701_f	03AI4,45AI3,	887.384	3545.5	887.381	2	24.13	01Y41Y41M(31M21M21M)61M(31M21M)61M21M	301.15	6	19.23
Q9UH99_ALSPNSTISSAPK_5_HexNAc(2)Hex(7)	15992	Q9UH99	ALSPNSTISSAPK	N5GlcNAc	2	N2H7F0S0	2	N,6;	6	636	5	0.743553	55.9	21.61	1407.61	C112H190N17O65	2	75.55	19_Ovarian_human_15ug_TR3_240617_f	BI2,BIII3,YI3,YIII3,	1407.61	2813.21	1407.61	2	0	01Y41Y41M(31M21M21M)61M(31M)61M	300.88	26	91.67
Q96HE7_KWGHNITEFQQR_5_HexNAc(2)Hex(6)	21625	Q96HE7	KWGHNITEFQQR	N5GlcNAc	3	N2H6F0S0	4	N,2;	2	280	5	3.45192	50.14	24.75	975.094	C121H189N24O59	1	110.58	12_Tetis_human_8ug_TR3_231109_f	BI2,YI3,ZI3,YI3,	975.094	2922.25	975.09	1	15.38	01Y41Y41M(31M21M)61M(31M)61M	300.79	16	68.18
Q15165_HTNMNLTQLK_5_HexNAc(2)Hex(9)	18164	Q15165	HTNMNLTQLK	N5GlcNAc	3	N2H9F0S0	1	N,9;	9	254	5	0.635541	46.99	24.11	1022.42	C120H203N18O71S1	1	86.08	18_adg_human_15ug_TR3_240615_f	45AI3,	1022.42	3064.25	1022.42	1	2.38	01Y41Y41M(31M21M21M)61M(31M21M)61M21M	300.54	23	105.56
P11055_DPLNETVVGLYQKSSNR_4_HexNAc(5)Hex(5)NeuAc(1)	36260	P11055	DPLNETVVGLYQKSSNR	N4GlcNAc	4	N5H5F0S1	0	N,1;	1	603	4	11.4497	52.61	18.43	1010.45	C163H267N30O87	1	180.22	11_Spleen_human_15ug_TR2_231108_f		1010.45	4036.74	1010.44	1	35.07	01Y41Y41M(31M41Y)61M61Y41L31Y41L32S	300.44	6	18.75
O95479_DVLQNHLTEVLTLVAMELPHNVSSAEAVLR_21_HexNAc(2)Hex(8)	45976	O95479	DVLQNHLTEVLTLVAMELPHNVSSAEAVLR	N21GlcNAc	4	N2H8F0S0	1	N,6;	6	282	21	0.581517	41.75	16.82	1251.59	C208H347N42O96S1	1	223.75	18_adg_human_15ug_TR1_240615_f	25AIII2,	1251.59	5001.33	1251.59	2	5.96	01Y41Y41M(31M21M21M31G)61M(31M)61M	299.98	32	55.17
Q9Y2E5_RPYVSYVNNSIAR_8_HexNAc(2)Hex(6)	19602	Q9Y2E5	RPYVSYVNNSIAR	N8GlcNAc	3	N2H6F0S0	4	N,1;	1	748	8	1.10491	57.79	21.68	973.435	C120H194N23O60	1	93.17	18_adg_human_15ug_TR3_240615_f	BI2,YI3,ZI3,YI3,	973.435	2917.28	973.434	1	15.45	01Y41Y41M(31M)61M(31M21M)61M	299.91	16	62.5
Q07954_MHLNGSNVQVLHR_4_HexNAc(4)Hex(5)Fuc(1)NeuAc(1)	18639	Q07954	MHLNGSNVQVLHR	N4GlcNAc	3	N4H5F1S1	0	N,2;	2	3089	4	0.469061	37.24	18.54	1189.51	C142H235N28O75S1	2	88.48	18_adg_human_15ug_TR2_240615_f		1189.18	3564.52	1189.18	2	3.67	01Y41Y41M(31M)61M(21Y(31F)41L32S)61Y41L	299.89	19	66.67
Q96AY3_YHYNGTFEDGK_4_HexNAc(2)Hex(8)	15450	Q96AY3	YHYNGTFEDGK	N4GlcNAc	3	N2H8F0S0	1	N,6;	6	70	4	1.4322	44.86	21.47	1012.06	C124H186N17O70	1	73.03	18_adg_human_15ug_TR2_240615_f	25AIII2,	1012.06	3033.15	1012.06	2	0	01Y41Y41M(31M21M21M31G)61M(31M)61M	299.84	22	95
P54289_VLKDAVNNITAK_8_HexNAc(2)Hex(7)	14453	P54289	VLKDAVNNITAK	N8GlcNAc	3	N2H7F0S0	2	N,12;	12	324	8	-0.282658	45.12	20.61	943.098	C114H197N18O63	1	71.51	15_bigintes_human_15ug_TR3_240616_f	BI2,BIII3,YI3,YIII3,	943.098	2826.28	943.098	2	2.35	01Y41Y41M(31M21M21M)61M(31M)61M	299.76	25	104.55
P02679_VDKDLQSLEDILHQVENK_17_HexNAc(4)Hex(5)Fuc(1)NeuAc(1)	36643	P02679	VDKDLQSLEDILHQVENK	N17GlcNAc	4	N4H5F1S1	0	N,7;	7	78	17	2.10937	39.41	19.19	1046.97	C170H281N30O90	1	175.6	21_Bladder_human_15ug_TR2_240619_f		1046.97	4182.83	1046.97	2	0.58	01Y41Y41M(31M41Y(31F)41L)61M61Y41L32S	299.75	27	76.47
P00450_ELHHLQEQNVSNAFLDK_9_HexNAc(4)Hex(5)NeuAc(2)	25148	P00450	ELHHLQEQNVSNAFLDK	N9GlcNAc	4	N4H5F0S2	4	N,4;	4	762	9	1.35815	38.33	18.58	1057.95	C172H273N32O90	1	118.35	21_Bladder_human_15ug_TR3_240619_f	01AIII1,BIII1,ZI3,YI3,	1057.95	4226.78	1057.95	1	3.25	01Y41Y41M(31M)61M(21Y41L32S)61Y41L32S	299.68	24	68.75
O95479_NINSSCRPGPGAWLR_3_HexNAc(2)Hex(5)	23340	O95479	NINSSCRPGPGAWLR	N3GlcNAcC6Cam	3	N2H5F0S0	15	N,1;	1	157	3	-3.29827	52.2	13.1	968.425	C117H190N27O56S1	1	111.43	18_adg_human_15ug_TR1_240615_f	BI1,BII1,BIII1,BI2,03AI2,CI2,YI1,YI2,YI3,02XI1,ZI1,YI1,ZI2,YI2,ZI3,YI3,YI4,YII4,YIII3,	968.089	2901.26	968.092	1	0	01Y41Y41M(31M)61M(31M)61M	299.51	12	39.29
Q5XPI4_KFLQENASGR_6_HexNAc(2)Hex(3)Fuc(1)	13741	Q5XPI4	KFLQENASGR	N6GlcNAc	3	N2H3F1S0	14	N,1;	1	538	6	3.5621	16.88	13.05	730	C89H147N18O45	1	64.56	18_adg_human_15ug_TR3_240615_f	BI1,BII1,BI2,YI2,02XI1,BI3,ZI1,YI1,ZI2,YI2,ZI3,ZII3,YI3,YII3,02XI1,ZI1,YI1,	730.334	2187.98	730.332	1	0	01Y(61F)41Y41M(31M)61M	299.45	9	33.33
P19022_NWTITR_1_HexNAc(2)Hex(8)	20116	P19022	NWTITR	N1GlcNAc	2	N2H8F0S0	0	N,2;	2	651	1	2.45248	71.51	19.77	1247.51	C99H162N13O60	1	103.07	12_Tetis_human_8ug_TR3_231109_f		1247.51	2493	1247.51	2	9.74	01Y41Y41M(31M21M21M)61M(31M21M)61M	299.32	14	110
P49116_NLTYSCRSNQDCIINK_1_HexNAc(2)Hex(5)	19233	P49116	NLTYSCRSNQDCIINK	N1GlcNAcC6CamC12Cam	3	N2H5F0S0	16	N,1;	1	148	1	-1.92372	27.69	10.02	1068.45	C126H209N28O64S2	1	96.17	human_brain_14ug_TR3_0703_f	BI1,BII1,BIII1,BI2,CI1,CII1,CIII1,YI1,ZI2,YI2,YI3,02XI1,34XI1,ZI1,YI1,24XI2,ZI2,YI2,ZI3,YI3,	1068.45	3202.34	1068.45	1	0	01Y41Y41M(31M)61M(31M)61M	299.27	8	26.67
Q5SQI0_HGGVNSSSPNTGNQDSK_5_HexNAc(4)Hex(5)Fuc(1)NeuAc(1)	24053	Q5SQI0	HGGVNSSSPNTGNQDSK	N5GlcNAc	3	N4H5F1S1	3	N,2;	2	343	5	6.87085	41.51	20.65	1249.84	C144H234N29O86	1	114.85	18_adg_human_15ug_TR3_240615_f	ZI3,YI3,YI3,	1249.51	3745.48	1249.5	2	15.77	01Y(61F)41Y41M(31M)61M(21Y41L32S)61Y41L	299.1	8	18.75
P11117_NESDKAPWPLSLPGCPHR_1_HexNAc(2)Hex(5)	28032	P11117	NESDKAPWPLSLPGCPHR	N1GlcNAcC15Cam	4	N2H5F0S0	16	N,3;	3	331	1	2.20795	44.38	19.47	820.363	C136H214N29O62S1	1	134.24	18_adg_human_15ug_TR2_240615_f	BI1,BII1,BIII1,BI2,03AI4,03AI2,CI2,04AI3,ZI1,YI1,34XI2,ZI2,YI2,YI3,02XI1,ZI1,YI1,YI2,	820.363	3277.42	820.362	1	0	01Y41Y41M(31M)61M(31M)61M	299.05	24	70.59
P28906_LTQGICLEQNK_10_HexNAc(5)Hex(5)	19617	P28906	LTQGICLEQNK	C6CamN10GlcNAc	3	N5H5F0S0	0	N,8;	8	194	10	6.2037	52.06	23.94	1044.79	C124H210N21O69S1	1	100.59	12_Tetis_human_8ug_TR3_231109_f		1044.12	3129.33	1044.12	1	11.84	01Y41Y41M(31M41Y41L31Y41L)61M61Y	299.02	28	115
Q9UHL4_RNLSASVIAVTIQGGAHHLDLR_2_HexNAc(2)Hex(8)	29639	Q9UHL4	RNLSASVIAVTIQGGAHHLDLR	N2GlcNAc	5	N2H8F0S0	1	N,9;	9	428	2	0.836263	43.37	18.92	807.182	C164H277N36O80	1	141.99	18_adg_human_15ug_TR1_240615_f	12AIII4,	807.382	4030.87	807.382	1	4.33	01Y41Y41M(31M21M21M31G)61M(31M)61M	298.92	26	61.9
Q8NFY9_SCVEKGPSNTNGCTQR_11_HexNAc(2)Hex(3)	24031	Q8NFY9	SCVEKGPSNTNGCTQR	C2CamN11GlcNAcC13Cam	3	N2H3F0S0	14	N,0;	0	274	11	3.60227	31.53	10.65	896.711	C102H172N27O53S2	1	114.75	18_adg_human_15ug_TR3_240615_f	BI1,BII1,BI2,03AI2,CI2,YI1,BI3,YI2,02XI1,ZI1,YI1,35XI2,YI2,YI3,YII3,YI1,	896.71	2687.1	896.707	1	0	01Y41Y41M(31M)61M	298.47	6	16.67
P10909_LANLTQGEDQYYLR_3_HexNAc(4)Hex(5)NeuAc(2)	27437	P10909	LANLTQGEDQYYLR	N3GlcNAc	3	N4H5F0S2	0	N,4;	4	374	3	1.801	48.02	23.29	1297.54	C158H251N26O86	1	129.12	21_Bladder_human_15ug_TR3_240619_f		1297.54	3888.61	1297.54	1	19	01Y41Y41M(31M)61M(21Y41L32S)61Y41L32S	298.32	25	84.62
P02787_QQQHLFGSNVTDCSGNFCLFR_9_HexNAc(4)Hex(5)NeuAc(1)	33905	P02787	QQQHLFGSNVTDCSGNFCLFR	N9GlcNAcC13CamC18Cam	3	N4H5F0S1	3	N,1;	1	630	9	4.45834	47.42	22.24	1477.61	C180H279N38O87S2	1	161.18	21_Bladder_human_15ug_TR3_240619_f	45AI4,03AI5,35AI5,	1477.61	4428.8	1477.61	1	10.13	01Y41Y41M(31M41Y41L)61M61Y41L32S	298.25	25	57.5
Q9UHI6_LNSSDPSLIGLK_2_HexNAc(3)Hex(4)	26313	Q9UHI6	LNSSDPSLIGLK	N2GlcNAc	3	N3H4F0S0	2	N,1;	1	267	2	6.34737	41.11	15.3	834.391	C102H174N17O54	1	127.63	02_RE_Liver_human_15ug_TR2_240613_f	BII1,CII1,	834.724	2501.14	834.719	1	5.64	01Y41Y41M(31M41Y)61M61M	298.24	7	18.18
Q96RK0_KNSTDLDSAPEDPTSPK_2_HexNAc(5)Hex(4)	13135	Q96RK0	KNSTDLDSAPEDPTSPK	N2GlcNAc	4	N5H4F0S0	1	N,1;	1	1396	2	7.3276	44.73	21.35	867.627	C138H226N25O77	1	60.68	15_bigintes_human_15ug_TR1_240616_f	34AII4,	867.376	3465.45	867.37	1	43.4	01Y41Y41M(31M41Y41L31Y)61M61Y	298.13	7	18.75
Q8TCJ2_TTLVDNNTWNNSHIALVGK_10_HexNAc(2)Hex(10)	25713	Q8TCJ2	TTLVDNNTWNNSHIALVGK	N10GlcNAc	3	N2H10F0S0	0	N,2;	2	627	10	4.53988	37.96	18.25	1375.59	C167H272N29O90	1	122.97	18_adg_human_15ug_TR1_240615_f		1375.93	4123.76	1375.93	2	4.28	01Y41Y41M(31M21M21M31G31G)61M(31M21M)61M	297.98	27	72.22
Q6P179_NISDISENLK_1_HexNAc(2)Hex(5)	26501	Q6P179	NISDISENLK	N1GlcNAc	2	N2H5F0S0	17	N,4;	4	714	1	-1.6264	44.55	12.97	1175.51	C93H158N15O54	1	127.69	16_Pancreas_human_15ug_TR1_240614_f	BI1,BII1,BIII1,CI1,CII1,CIII1,15AI2,BI2,02XI1,ZI1,YI1,ZI2,YI2,YI3,YI4,YII4,YIII3,MH,02XI1,ZI1,YI1,YI2,YI3,	1175.51	2349.01	1175.51	1	0	01Y41Y41M(31M)61M(31M)61M	297.9	16	72.22
Q17RG1_KCTTINLTQK_6_HexNAc(2)Hex(6)	18965	Q17RG1	KCTTINLTQK	C2CamN6GlcNAc	3	N2H6F0S0	5	N,1;	1	617	6	-6.80346	40.1	10.89	862.375	C102H178N17O57S1	1	88.87	20_Oesophagus_human_15ug_TR3_240618_f	BI2,CI2,YI3,ZI3,YI3,	862.709	2585.13	862.715	1	20.25	01Y41Y41M(31M21M)61M(31M)61M	297.86	7	27.78
P12109_NVTAQICIDK_1_HexNAc(3)Hex(5)NeuAc(1)	20509	P12109	NVTAQICIDK	N1GlcNAcC7Cam	3	N3H5F0S1	10	N,6;	6	804	1	-0.00496431	44.91	17.58	958.404	C113H191N18O65S1	1	95.57	21_Bladder_human_15ug_TR3_240619_f	02AII2,BII2,BII1,CII1,35AII4,BII2,35AII3,BII3,35AII4,02XI4,	958.403	2872.19	958.403	1	11.36	01Y41Y41M(31M41Y41L32S)61M61M	297.82	25	122.22
Q9H201_SRGSPSSYNSSSSSPR_9_HexNAc(5)Hex(5)Fuc(1)	15038	Q9H201	SRGSPSSYNSSSSSPR	N9GlcNAc	3	N5H5F1S0	0	N,1;	1	187	9	3.67926	44.5	21.32	1205.83	C140H229N28O82	1	70.62	19_Ovarian_human_15ug_TR1_240617_f		1205.83	3614.46	1205.83	1	1.54	01Y41Y41M(31M41Y(31F)41L31Y41L)61M61Y	297.78	7	16.67
Q9P2K8_EVEAKFCNLSLSSNSLCR_8_HexNAc(3)Hex(6)	29047	Q9P2K8	EVEAKFCNLSLSSNSLCR	C7CamN8GlcNAcC17Cam	3	N3H6F0S0	26	N,0;	0	1246	8	3.43428	34.6	14.06	1232.86	C147H244N29O76S2	1	140.99	02_RE_Liver_human_15ug_TR3_240613_f	01AI1,01AII1,01AIII1,BI1,BII1,BIII1,BI2,BIII2,CIII2,02AIII3,BI2,CI2,BIII3,CIII3,YI1,02XI2,YI2,13XIII3,24XIII3,YI3,24XIII4,YI1,BI3,02XI2,ZI2,YI2,13XIII3,24XIII3,YI3,24XIII4,YI1,YI2,	1233.2	3695.56	1233.19	1	0	01Y41Y41M(31M41Y41L)61M(31M)61M	297.74	7	14.71
A8K2U0_THHWNITAVK_5_HexNAc(4)Hex(3)	19159	A8K2U0	THHWNITAVK	N5GlcNAc	3	N4H3F0S0	0	N,9;	9	857	5	-1.84615	42.89	14.38	836.043	C105H166N21O49	1	89.51	20_Oesophagus_human_15ug_TR2_240618_f		836.043	2505.11	836.044	1	21.18	01Y41Y41M(31M41Y)61M61Y	297.71	20	100
P13473_VQPFNVTQGK_5_HexNAc(4)Hex(5)	17460	P13473	VQPFNVTQGK	N5GlcNAc	2	N4H5F0S0	0	N,4;	4	356	5	1.62698	41.17	18.7	1370.59	C112H183N18O60	1	82.7	18_adg_human_15ug_TR3_240615_f		1371.1	2740.18	1371.1	1	22.26	01Y41Y41M(31M41Y41L)61M61Y41L	297.64	21	100
Q8NI77_GTRFVEGTNINR_11_HexNAc(2)Hex(8)	18549	Q8NI77	GTRFVEGTNINR	N11GlcNAc	3	N2H8F0S0	5	N,1;	1	282	11	2.65041	47.27	19.96	1023.11	C121H201N22O69	1	86.16	17_Prostate_human_15ug_TR1_240619_f	45AI3,35AI3,01AI3,YI3,YI3,	1023.11	3066.29	1023.1	1	9.97	01Y41Y41M(31M21M)61M(31M21M)61M21M	297.58	7	18.18
Q685J3_TVLDNATEVVKEK_5_HexNAc(2)Hex(4)	26539	Q685J3	TVLDNATEVVKEK	N5GlcNAc	3	N2H4F0S0	19	N,2;	2	4267	5	-0.150756	33.96	14.01	834.391	C102H175N18O53	1	128.64	02_RE_Liver_human_15ug_TR1_240613_f	01AII2,BI1,BII1,BII2,BII2,BI2,YI1,YI2,YII3,02XI1,ZI1,YI1,BI3,ZI2,YI2,ZII3,YII3,02XI1,ZI1,YI1,	834.391	2500.16	834.391	1	0	01Y41Y41M(31M21M)61M	297.47	7	20.83
Q9HCJ0_KTNGNNGTNGALVQSPSNQSALGAGGANSNGSAAR_30_HexNAc(2)Hex(6)	15752	Q9HCJ0	KTNGNNGTNGALVQSPSNQSALGAGGANSNGSAAR	N30GlcNAc	6	N2H6F0S0	5	N,2;	2	45	30	6.42974	34.84	14.18	771.183	C179H299N50O92	1	72.96	15_bigintes_human_15ug_TR1_240616_f	35AI3,BI2,ZI3,04XI3,YI3,	771.35	4621.03	771.345	1	11.51	01Y41Y41M(31M21M)61M(31M)61M	297.36	11	16.18
Q96ID5_VPAELNGSMYR_6_HexNAc(2)Hex(5)	19104	Q96ID5	VPAELNGSMYR	N6GlcNAc	2	N2H5F0S0	15	N,5;	5	407	6	-0.806231	59.52	22.86	1227.52	C99H162N17O52S1	1	96.65	human_brain_14ug_TR2_0703_f	03AI2,BI1,BII1,BIII1,02XI1,ZI1,YI1,YI2,YI3,BI4,YI4,YII4,YIII3,MH,02XI1,ZI1,YI1,YI2,YI3,	1227.52	2453.03	1227.52	1	0	01Y41Y41M(31M)61M(31M)61M	297.02	23	100
Q96HE7_WGHNITEFQQR_4_HexNAc(2)Hex(5)	21702	Q96HE7	WGHNITEFQQR	N4GlcNAc	3	N2H5F0S0	19	N,6;	6	280	4	-0.904903	35.07	14.93	878.039	C109H167N22O53	1	101.92	20_Oesophagus_human_15ug_TR3_240618_f	BI1,BII1,BIII1,BI2,45AI2,03AI2,CI2,YI1,YI2,YI3,02XI1,YI1,ZI2,YI2,YI3,YI4,YII4,YIII3,01XI1,02XI1,03XI1,ZI1,YI1,	878.374	2632.1	878.374	1	0	01Y41Y41M(31M)61M(31M)61M	297.02	19	85
Q16853_YLYLASNHSNK_7_HexNAc(5)Hex(5)Fuc(1)NeuAc(2)	19368	Q16853	YLYLASNHSNK	N7GlcNAc	3	N5H5F1S2	0	N,8;	8	592	7	1.01464	42.07	15.25	1288.86	C157H248N23O88	2	95.73	10_Fat_human_15ug_TR1_231011_f		1289.2	3863.56	1289.19	2	5.75	01Y41Y41M(31M41Y)61M(21Y(31F)41L32S)61Y41L32S	296.93	23	100
Q9Y6A1_FVHVNTSAVLK_5_HexNAc(2)Hex(8)	21832	Q9Y6A1	FVHVNTSAVLK	N5GlcNAc	3	N2H8F0S0	2	N,15;	15	471	5	-0.141289	39.16	14.13	973.43	C120H198N17O65	1	104.23	18_adg_human_15ug_TR2_240615_f	04XI3,YI3,	973.43	2917.27	973.43	2	0	01Y41Y41M(31M21M)61M(31M21M)61M21M	296.61	25	115
P07996_VVNSTTGPGEHLR_3_HexNAc(4)Hex(4)NeuAc(1)	15147	P07996	VVNSTTGPGEHLR	N3GlcNAc	3	N4H4F0S1	3	N,3;	3	1067	3	1.28696	57.91	20.45	1040.45	C124H205N24O68	1	77.34	11_Spleen_human_15ug_TR3_231108_f	ZI3,YI3,YI3,	1040.45	3118.33	1040.45	1	6.13	01Y41Y41M(31M)61M(21Y41L32S)61Y	296.56	20	75
P05783_IVDGKVVSETNDTK_11_HexNAc(4)Hex(3)Fuc(1)	11608	P05783	IVDGKVVSETNDTK	N11GlcNAc	3	N4H3F1S0	0	N,2;	2	423	11	0.0974823	47.6	19.28	984.113	C119H202N21O64	1	54.27	02_RE_Liver_human_15ug_TR1_240613_f		984.113	2949.32	984.113	2	9.9	01Y41Y41M(31M41Y31F)61M61Y	296.45	9	26.92
P02751_GGNSNGALCHFPFLYNNHNYTDCTSEGR_19_HexNAc(3)Hex(4)NeuAc(1)	30584	P02751	GGNSNGALCHFPFLYNNHNYTDCTSEGR	C9CamN19GlcNAcC23Cam	4	N3H4F0S1	24	N,2;	2	430	19	1.45997	57.49	29.23	1189.23	C194H289N46O89S2	1	145.12	19_Ovarian_human_15ug_TR1_240617_f	02AI2,BI2,BII1,BI1,35AI4,BI2,CI2,35AI3,BI3,35AI4,35AI5,02XI1,YI1,YI2,YI3,YI4,YI5,YI6,02XI1,ZI1,YI1,YI2,YI3,YI4,	1188.98	4750.89	1188.98	1	0	01Y41Y41M(31M)61M61Y41L32S	296.3	16	29.63
O00160_SESINVTLNVEQAAYTR_5_HexNAc(2)Hex(6)	36012	O00160	SESINVTLNVEQAAYTR	N5GlcNAc	3	N2H6F0S0	3	N,1;	1	338	5	3.93618	30.27	11.03	1092.49	C132H218N25O70	1	175.74	16_Pancreas_human_15ug_TR3_240614_f	BI2,YI3,YI3,	1092.15	3273.43	1092.15	1	6.86	01Y41Y41M(31M)61M(31M21M)61M	296.26	8	18.75
Q9UMR5_CPMAGISHTAWHSNR_14_HexNAc(2)Hex(6)	17934	Q9UMR5	CPMAGISHTAWHSNR	C1CamN14GlcNAc	4	N2H6F0S0	4	N,9;	9	289	14	-2.08558	47.9	23.93	776.569	C124H196N27O61S2	1	84.95	18_adg_human_15ug_TR3_240615_f	BI2,BI2,YI3,YI3,	776.818	3103.25	776.819	1	4.7	01Y41Y41M(31M)61M(31M21M)61M	296.15	22	75
P01042_HGIQYFNNNTQHSSLFMLNEVKR_8_HexNAc(4)Hex(5)NeuAc(2)	28357	P01042	HGIQYFNNNTQHSSLFMLNEVKR	N8GlcNAc	4	N4H5F0S2	0	N,1;	1	169	8	-2.46781	39.38	20.56	1246.79	C206H322N43O97S1	1	136.56	15_bigintes_human_15ug_TR3_240616_f		1246.79	4982.13	1246.79	1	24.54	01Y41Y41M(31M)61M(21Y41L32S)61Y41L32S	296.12	18	40.91
Q9P2K8_GNFSIRTAK_2_HexNAc(2)Hex(7)	11655	Q9P2K8	GNFSIRTAK	N2GlcNAc	3	N2H7F0S0	4	N,3;	3	1055	2	0.0925363	63.89	28.74	845.698	C101H169N16O58	1	54.59	02_RE_Liver_human_15ug_TR2_240613_f	BI2,ZI3,YI3,YI3,	845.698	2534.08	845.698	1	16	01Y41Y41M(31M21M)61M(31M21M)61M	296.05	11	50
P52732_LTDNGTEFSVK_4_HexNAc(2)Hex(6)	23372	P52732	LTDNGTEFSVK	N4GlcNAc	2	N2H6F0S0	4	N,1;	1	150	4	4.67141	66.23	18.83	1295.55	C104H170N15O60	1	112.23	16_Pancreas_human_15ug_TR1_240614_f	BI2,ZI3,YI3,YI3,	1295.55	2589.07	1295.54	2	0	01Y41Y41M(31M21M)61M(31M)61M	296.03	8	25
P43121_CGLSQSQGNLSHVDWFSVHK_9_HexNAc(5)Hex(5)Fuc(1)	28804	P43121	CGLSQSQGNLSHVDWFSVHK	C1CamN9GlcNAc	4	N5H5F1S0	0	N,0;	0	56	9	2.69281	30.25	23.01	1065.71	C175H274N35O85S1	1	138.34	10_Fat_human_15ug_TR3_231011_f		1065.71	4257.79	1065.71	1	7.32	01Y41Y41M(31M41Y41L31Y41L)61M61Y31F	295.83	21	55.26
Q96F81_VSPNGCLQLNGTVKSSFLPLDNQR_10_HexNAc(2)Hex(8)	29502	Q96F81	VSPNGCLQLNGTVKSSFLPLDNQR	C6CamN10GlcNAc	3	N2H8F0S0	0	N,0;	0	59	10	-5.09828	35.1	16.89	1450.31	C177H293N36O87S1	1	138.76	20_Oesophagus_human_15ug_TR3_240618_f		1450.31	4346.93	1450.32	2	14.56	01Y41Y41M(31M21M21M)61M(31M21M)61M	295.83	6	13.04
P14384_TVAQNYSSVTHLHSIGK_5_HexNAc(5)Hex(5)Fuc(1)	20432	P14384	TVAQNYSSVTHLHSIGK	N5GlcNAc	4	N5H5F1S0	0	N,4;	4	38	5	1.98466	39.26	20.14	954.426	C156H254N29O80	4	100.64	10_Fat_human_15ug_TR1_231011_f		954.677	3813.67	954.675	2	3.26	01Y41Y41M(31M41Y(31F)41L31Y)61M61Y41L	295.82	25	68.75
Q6N021_RNEASLPSILQYQPNLSNQMTSK_15_HexNAc(2)Hex(9)	25998	Q6N021	RNEASLPSILQYQPNLSNQMTSK	N15GlcNAc	4	N2H9F0S0	0	N,2;	2	595	15	4.03311	39.18	12.47	1122	C181H300N35O93S1	1	131.03	human_brain_14ug_TR1_0703_f_new		1122.25	4483.95	1122.25	1	9.11	01Y41Y41M(31M21M21M31G)61M(31M21M)61M	295.66	9	20.45
P15144_KLNYTLSQGHR_3_HexNAc(4)Hex(5)	14295	P15144	KLNYTLSQGHR	N3GlcNAc	4	N4H5F0S0	3	N,3;	3	128	3	2.03204	34.68	17.69	736.331	C119H196N23O62	1	67.64	18_adg_human_15ug_TR1_240615_f	ZI3,YI3,YI3,	735.83	2939.29	735.829	2	18.48	01Y41Y41M(31M)61M(21Y41L)61Y41L	295.52	21	90
Q6KC79_QNESTIVEPKQNENR_2_HexNAc(4)Hex(3)	17909	Q6KC79	QNESTIVEPKQNENR	N2GlcNAc	3	N4H3F0S0	0	N,1;	1	664	2	3.37228	42.95	10.58	1029.46	C122H203N28O64	1	90.83	11_Spleen_human_15ug_TR2_231108_f		1029.13	3084.35	1029.12	2	2.25	01Y41Y41M(31M)(41Y)61M61Y	295.44	8	21.43
Q8WXH0_EIKESLMVLNSSEGK_10_HexNAc(2)Hex(6)	25946	Q8WXH0	EIKESLMVLNSSEGK	N10GlcNAc	3	N2H6F0S0	6	N,2;	2	2068	10	2.30105	43.33	16.2	1015.45	C122H209N20O66S1	1	123.17	19_Ovarian_human_15ug_TR2_240617_f	BI2,04AI3,BI2,YI3,YI3,02XI4,02XII4,	1015.12	3042.33	1015.12	1	6.86	01Y41Y41M(31M)61M(31M21M)61M	295.34	11	32.14
P05556_KDTCTQECSYFNITK_12_HexNAc(2)Hex(5)	23188	P05556	KDTCTQECSYFNITK	C4CamC8CamN12GlcNAc	3	N2H5F0S0	10	N,6;	6	669	12	1.51935	31.01	12.82	1038.43	C125H200N23O64S2	1	112.09	10_Fat_human_15ug_TR3_231011_f	BI1,BII1,BIII1,BI2,ZI3,02XI1,ZI1,YI1,YI2,YI3,YI4,YII4,YIII3,YI1,	1038.09	3111.25	1038.09	1	0	01Y41Y41M(31M)61M(31M)61M	295.28	28	96.43
Q8NEZ3_NHKDNLTSIAVSQTLNK_5_HexNAc(4)Hex(5)Fuc(1)NeuAc(1)	23518	Q8NEZ3	NHKDNLTSIAVSQTLNK	N5GlcNAc	3	N4H5F1S1	0	N,1;	1	277	5	7.121	35.78	14.84	1315.59	C158H265N30O85	1	110.65	21_Bladder_human_15ug_TR2_240619_f		1315.59	3942.73	1315.58	1	6.56	01Y41Y41M(31M41Y41L)61M21Y(31F)41L32S	295.12	7	15.63
Q07075_HTAEYAANITK_8_HexNAc(5)Hex(4)	13175	Q07075	HTAEYAANITK	N8GlcNAc	3	N5H4F0S0	0	N,4;	4	324	8	4.91445	27.79	14.3	962.081	C117H189N20O63	1	61.76	18_adg_human_15ug_TR2_240615_f		961.751	2882.22	961.746	1	20.8	01Y41Y41M(31M41Y41L31Y)61M61Y	295.12	16	70
P12109_NVTAQICIDK_1_HexNAc(3)Hex(4)NeuAc(1)	20738	P12109	NVTAQICIDK	N1GlcNAcC7Cam	2	N3H4F0S1	10	N,5;	5	804	1	-0.00745488	39.49	17.32	1356.08	C107H181N18O60S1	1	96.7	21_Bladder_human_15ug_TR3_240619_f	BI1,CI1,35AI4,BI2,03AI5,35AI3,BI3,35AI4,BI4,35AI5,	1356.07	2710.14	1356.07	1	12.19	01Y41Y41M(31M)61M61Y41L32S	294.96	27	122.22
P43307_YPQDYQFYIQNFTALPLNTVVPPQR_11_HexNAc(2)Hex(9)	37611	P43307	YPQDYQFYIQNFTALPLNTVVPPQR	N11GlcNAc	3	N2H9F0S0	0	N,16;	16	136	11	0.229872	50.72	19.12	1627.06	C212H323N36O94	1	183.89	02_RE_Liver_human_15ug_TR2_240613_f		1627.06	4877.16	1627.06	1	1.67	01Y41Y41M(31M21M21M)61M(31M21M)61M21M	294.96	36	75
P07996_VVNSTTGPGEHLR_3_HexNAc(4)Hex(5)NeuAc(2)	15524	P07996	VVNSTTGPGEHLR	N3GlcNAc	3	N4H5F0S2	4	N,1;	1	1067	3	2.98007	42.89	23.66	1191.5	C141H232N25O81	1	79.16	11_Spleen_human_15ug_TR3_231108_f	15AIII1,BIII1,YI3,YI3,	1191.5	3571.48	1191.5	1	3.76	01Y41Y41M(31M)61M(21Y41L32S)61Y41L32S	294.82	18	62.5
P50897_NHSIFLADINQER_1_HexNAc(2)Hex(4)	24338	P50897	NHSIFLADINQER	N1GlcNAc	3	N2H4F0S0	19	N,6;	6	197	1	3.98178	38.74	15.64	871.394	C107H172N23O52	1	116.25	18_adg_human_15ug_TR2_240615_f	01AII2,BI1,BII1,BII2,45AI2,BI2,03AI2,14AII2,02AI2,BII2,BI2,24AI3,01XI1,02XI1,YI1,ZI2,YI2,YII3,YI3,YII4,01XI1,YI1,	871.394	2611.15	871.39	1	0	01Y41Y41M(31M21M)61M	294.77	25	100
Q3LI73_SFNLTK_3_HexNAc(2)Hex(7)	11974	Q3LI73	SFNLTK	N3GlcNAc	2	N2H7F0S0	2	N,1;	1	80	3	0.56349	70.67	17.37	1125.96	C90H149N10O55	1	56.11	02_RE_Liver_human_15ug_TR3_240613_f	YI3,YI3,	1125.96	2249.92	1125.96	2	5.09	01Y41Y41M(31M)61M(31M21M)61M21M	294.73	8	50
Q32NC0_MLLSQNESQKIPK_6_HexNAc(2)Hex(7)	23851	Q32NC0	MLLSQNESQKIPK	N6GlcNAc	3	N2H7F0S0	4	N,2;	2	197	6	2.88019	37.74	14.66	1019.79	C123H211N20O66S1	2	118.46	human_brain_14ug_TR3_0703_f	BI2,BIII3,CI2,CIII3,BI2,BIII3,YI3,YIII3,	1019.79	3056.35	1019.79	2	0	01Y41Y41M(31M21M21M)61M(31M)61M	294.43	8	20.83
P01876_LSLHRPALEDLLLGSEANLTCTLTGLR_18_HexNAc(2)Hex(5)	43412	P01876	LSLHRPALEDLLLGSEANLTCTLTGLR	N18GlcNAcC21Cam	4	N2H5F0S0	14	N,6;	6	144	18	0.718428	29.44	16.12	1046.26	C174H296N39O76S1	1	208.05	21_Bladder_human_15ug_TR1_240619_f	03AI2,CI2,BI1,BII1,BIII1,BI2,35AI4,03AI4,02AI3,BI2,YI2,BI4,ZI1,YI1,YI3,YI1,	1046.26	4180.02	1046.26	1	0	01Y41Y41M(31M)61M(31M)61M	294.38	32	61.54
P35613_ILLTCSLNDSATEVTGHR_8_HexNAc(2)Hex(6)	26798	P35613	ILLTCSLNDSATEVTGHR	C5CamN8GlcNAc	3	N2H6F0S0	3	N,3;	3	160	8	4.2972	39.74	22.07	1123.17	C134H226N27O70S1	1	136.06	12_Tetis_human_8ug_TR3_231109_f	BI2,YI3,YI3,	1122.83	3365.47	1122.83	1	7	01Y41Y41M(31M)61M(31M21M)61M	294.24	25	70.59
P07339_GSLSYLNVTRK_7_HexNAc(2)Hex(6)	20486	P07339	GSLSYLNVTRK	N7GlcNAc	3	N2H6F0S0	3	N,3;	3	263	7	-0.393797	54.01	16.08	873.061	C106H179N18O57	1	97.61	18_adg_human_15ug_TR2_240615_f	BI2,YI3,YI3,	873.061	2616.17	873.061	1	9.45	01Y41Y41M(31M)61M(31M21M)61M	294.18	21	85
Q9BX26_IYIEDNLSNSNEVEMEEK_6_HexNAc(3)Hex(5)	17529	Q9BX26	IYIEDNLSNSNEVEMEEK	N6GlcNAc	3	N3H5F0S0	0	N,0;	0	1293	6	-4.48499	56.16	20.82	1192.83	C144H232N25O77S1	1	88.99	11_Spleen_human_15ug_TR2_231108_f		1192.82	3575.47	1192.83	1	4.4	01Y41Y41M(31M)(41Y)61M31M21M	294.15	6	14.71
P08603_MDGASNVTCINSR_6_HexNAc(4)Hex(5)NeuAc(2)	15531	P08603	MDGASNVTCINSR	N6GlcNAcC9Cam	3	N4H5F0S2	0	N,2;	2	1029	6	0.864404	50.19	28.93	1211.14	C138H230N25O83S2	1	73.44	18_adg_human_15ug_TR2_240615_f		1210.81	3629.4	1210.81	1	17.56	01Y41Y41M(31M)61M(21Y41L32S)61Y41L32S	294.04	19	66.67
P10253_QVVENMTR_5_HexNAc(2)Hex(4)	12004	P10253	QVVENMTR	N5GlcNAc	2	N2H4F0S0	20	N,2;	2	390	5	0.633654	64.12	22.65	1016.43	C79H136N15O44S1	1	55.98	18_adg_human_15ug_TR2_240615_f	03AI2,14AII2,BI1,BII1,BII2,BII2,BI2,ZI1,YI1,ZI2,YI2,ZII3,BI3,YII3,YI3,YII4,MH,02XI1,YI1,YI2,ZII3,YII3,45XI3,	1015.93	2030.86	1015.93	1	0	01Y41Y41M(31M21M)61M	293.98	15	92.86
O95302_YHYNGTFLDGTLFDSSHNR_4_HexNAc(2)Hex(6)	30418	O95302	YHYNGTFLDGTLFDSSHNR	N4GlcNAc	4	N2H6F0S0	4	N,4;	4	174	4	-1.12921	40.53	18.11	906.627	C152H225N30O72	1	145.81	18_adg_human_15ug_TR3_240615_f	BI2,CI2,YI3,YI3,	906.627	3622.49	906.628	1	8.2	01Y41Y41M(31M21M)61M(31M)61M	293.79	24	66.67
Q6UXH1_NETHSICTACDESCK_1_HexNAc(2)Hex(6)	13517	Q6UXH1	NETHSICTACDESCK	N1GlcNAcC7CamC10CamC14Cam	3	N2H6F0S0	3	N,5;	5	190	1	1.56815	52.28	41.21	1064.73	C120H197N24O70S3	1	70.42	12_Tetis_human_8ug_TR1_231109_f	BI2,YI3,YI3,	1064.4	3190.18	1064.4	1	15.48	01Y41Y41M(31M)61M(31M21M)61M	293.57	28	96.43
P12110_GTFTDCALANMTEQIR_10_HexNAc(4)Hex(5)NeuAc(2)	32103	P12110	GTFTDCALANMTEQIR	C6CamN10GlcNAc	3	N4H5F0S2	0	N,4;	4	140	10	2.37435	40.43	19.11	1345.55	C159H259N28O88S2	1	150.8	20_Oesophagus_human_15ug_TR2_240618_f		1345.55	4032.61	1345.54	1	15.89	01Y41Y41M(31M)61M(21Y41L32S)61Y41L32S	293.56	26	76.67
P12110_HAELSFVFLTDGVTGNDSLHESAHSMR_16_HexNAc(6)Hex(7)	34676	P12110	HAELSFVFLTDGVTGNDSLHESAHSMR	N16GlcNAc	4	N6H7F0S0	0	N,1;	1	954	16	1.72164	24.13	22.26	1328.57	C217H342N43O108S1	2	166.56	19_Ovarian_human_15ug_TR2_240617_f		1328.82	5310.23	1328.81	2	10.99	01Y41Y41M(31M41Y41L31Y41L)61M(21Y41L)61Y41L	293.54	22	42.31
Q08380_AAIPSALDTNSSK_10_HexNAc(2)Hex(9)	16602	Q08380	AAIPSALDTNSSK	N10GlcNAc	2	N2H9F0S0	0	N,6;	6	551	10	2.84982	43.6	21.77	1571.16	C123H208N17O76	1	78.81	18_adg_human_15ug_TR1_240615_f		1570.66	3139.29	1570.65	1	2.38	01Y41Y41M(31M21M21M31G)61M(31M21M)61M	293.46	29	108.33
Q86YA3_NVLGGSTCYNYSVK_10_HexNAc(2)Hex(8)	14679	Q86YA3	NVLGGSTCYNYSVK	C8CamN10GlcNAc	3	N2H8F0S0	3	N,1;	1	1252	10	0.173328	41.77	17.32	1089.45	C131H211N20O73S1	1	69.75	02_RE_Liver_human_15ug_TR2_240613_f	45AI3,YI3,YI3,	1089.11	3264.31	1089.11	1	7.32	01Y41Y41M(31M21M)61M(31M21M)61M21M	293.26	7	19.23
Q12884_SVNASNYGLSPDRQFVYLESDYSK_3_HexNAc(3)Hex(3)	21203	Q12884	SVNASNYGLSPDRQFVYLESDYSK	N3GlcNAc	3	N3H3F0S0	8	N,2;	2	99	3	10.0794	30.38	13.5	1279.58	C163H249N34O72	1	100.13	04_Stomach_human_15ug_TR3_240614_f	BI1,CI1,BI2,CI2,ZI3,YI3,ZI4,YI4,	1279.58	3834.69	1279.57	1	61.99	01Y41Y41M(31M)61M61Y	293.25	7	15.22
Q66GS9_LQLELNLCQK_6_HexNAc(5)Hex(3)Fuc(1)	18937	Q66GS9	LQLELNLCQK	N6GlcNAcC8Cam	3	N5H3F1S0	0	N,1;	1	373	6	5.01474	46.78	18.59	969.776	C118H201N20O61S1	1	90.71	16_Pancreas_human_15ug_TR3_240614_f		969.776	2906.3	969.771	2	4.7	01Y41Y41M(31M41Y31F)61M(21Y)61Y	293.07	7	27.78
Q8NA56_KNICVDMLR_2_HexNAc(3)Hex(4)Fuc(1)NeuAc(1)	14140	Q8NA56	KNICVDMLR	N2GlcNAcC4Cam	3	N3H4F1S1	2	N,0;	0	67	2	4.80797	38.19	17.01	948.742	C112H192N19O61S2	1	66.53	18_adg_human_15ug_TR3_240615_f	03AI5,BI3,	948.742	2843.19	948.738	1	35.16	01Y(61F)41Y41M(31M)61M61Y41L32S	293.02	6	31.25
Q9UHP3_EITGINDTQILQQALK_6_HexNAc(2)Hex(8)	37226	Q9UHP3	EITGINDTQILQQALK	N6GlcNAc	3	N2H8F0S0	0	N,2;	2	31	6	3.9149	39.77	13.12	1163.86	C141H240N23O77	2	179.45	04_Stomach_human_15ug_TR1_240614_f		1163.53	3487.56	1163.53	1	4.56	01Y41Y41M(31M21M21M)61M(31M21M)61M	292.91	9	23.33
Q13449_VAWLNR_5_HexNAc(2)Hex(5)	18519	Q13449	VAWLNR	N5GlcNAc	2	N2H5F0S0	15	N,4;	4	66	5	-1.42896	86.15	18.26	988.431	C81H132N13O43	1	92.79	human_brain_14ug_TR3_0703_f	BI1,BII1,BIII1,YI1,BI2,02XI2,ZI2,YI2,YI3,02XI1,YI4,YII4,YIII3,ZI1,YI1,BI4,ZI2,YI2,YI3,	987.929	1974.85	987.931	1	0	01Y41Y41M(31M)61M(31M)61M	292.74	13	110
P55083_VDLEDFENNTAYAK_8_HexNAc(4)Hex(6)Fuc(2)NeuAc(1)	26932	P55083	VDLEDFENNTAYAK	N8GlcNAc	3	N4H6F2S1	0	N,4;	4	137	8	6.42599	36.13	20.31	1333.55	C162H255N22O93	1	136.99	12_Tetis_human_8ug_TR1_231109_f		1333.55	3996.59	1333.54	1	18.86	01Y41Y41M(31M(21Y(31F)41L32S)41Y(31F)41L)61M61M	292.73	27	96.15
Q9Y2T1_DRNHSATVQTGATPFSNPSLAPEDHK_3_HexNAc(2)Hex(6)	34643	Q9Y2T1	DRNHSATVQTGATPFSNPSLAPEDHK	N3GlcNAc	3	N2H6F0S0	4	N,1;	1	725	3	0.24362	23.42	10.34	1386.61	C169H268N39O82	1	166.64	04_Stomach_human_15ug_TR1_240614_f	BI2,BI2,YI3,YI3,	1386.61	4155.8	1386.61	1	2.19	01Y41Y41M(31M21M)61M(31M)61M	292.68	8	16
P02765_AALAAFNAQNNGSNFQLEEISR_11_HexNAc(4)Hex(5)NeuAc(2)	32015	P02765	AALAAFNAQNNGSNFQLEEISR	N11GlcNAc	3	N4H5F0S2	0	N,2;	2	176	11	1.53031	46.38	21.97	1524.99	C185H294N37O96	1	151.67	21_Bladder_human_15ug_TR3_240619_f		1524.65	4569.93	1524.65	1	2.65	01Y41Y41M(31M)61M(21Y41L32S)61Y41L32S	292.35	32	71.43
O60656_YTGTRPSNLANNTILVK_11_HexNAc(2)Hex(8)	22285	O60656	YTGTRPSNLANNTILVK	N11GlcNAc	3	N2H8F0S0	4	N,5;	5	344	11	-0.112989	40.9	17.26	1189.54	C145H243N26O76	1	104.67	20_Oesophagus_human_15ug_TR3_240618_f	45AI3,04AI4,YI3,YI3,	1189.2	3564.59	1189.2	1	21.3	01Y41Y41M(31M21M)61M(31M21M)61M21M	292.03	21	62.5
P43307_YPQDYQFYIQNFTALPLNTVVPPQR_11_HexNAc(2)Hex(8)	37787	P43307	YPQDYQFYIQNFTALPLNTVVPPQR	N11GlcNAc	3	N2H8F0S0	1	N,12;	12	136	11	1.9678	46.32	16.54	1573.05	C206H313N36O89	2	182.6	04_Stomach_human_15ug_TR2_240614_f	35AI3,	1573.05	4715.11	1573.04	1	3.47	01Y41Y41M(31M21M21M)61M(31M21M)61M	291.88	34	70.83
P26006_VWNSTFIEDYRDFDR_3_HexNAc(2)Hex(8)	33068	P26006	VWNSTFIEDYRDFDR	N3GlcNAc	3	N2H8F0S0	0	N,4;	4	935	3	4.23739	48.72	19.43	1223.17	C153H230N25O78	1	156.94	17_Prostate_human_15ug_TR3_240619_f		1222.84	3665.48	1222.83	1	2.26	01Y41Y41M(31M21M21M)61M(31M21M)61M	291.76	20	64.29
Q9UQB3_LPGGNNSNNTASK_8_HexNAc(2)Hex(9)	16989	Q9UQB3	LPGGNNSNNTASK	N8GlcNAc	3	N2H9F0S0	0	N,0;	0	948	8	-1.90918	52.1	19.61	1047.09	C120H201N20O76	1	81.33	02_RE_Liver_human_15ug_TR2_240613_f		1047.09	3138.25	1047.09	1	10.09	01Y41Y41M(31M21M21M)61M(31M21M)61M21M	291.54	8	20.83
O94898_YLNLSNNR_3_HexNAc(2)Hex(6)	17175	O94898	YLNLSNNR	N3GlcNAc	2	N2H6F0S0	3	N,1;	1	173	3	2.36393	63.55	12.56	1187	C94H155N16O54	1	87.64	11_Spleen_human_15ug_TR1_231108_f	BI2,YI3,YI3,	1187	2371.99	1187	2	0	01Y41Y41M(31M21M)61M(31M)61M	291.15	6	28.57
P02751_DQCIVDDITYNVNDTFHK_13_HexNAc(4)Hex(5)NeuAc(1)	32492	P02751	DQCIVDDITYNVNDTFHK	C3CamN13GlcNAc	3	N4H5F0S1	2	N,6;	6	528	13	-0.196588	46.04	21.12	1371.57	C167H261N30O87S1	1	153.34	21_Bladder_human_15ug_TR1_240619_f	03AI5,CII3,	1371.56	4110.66	1371.56	1	12.37	01Y41Y41M(31M41Y41L)61M61Y41L32S	290.94	26	73.53
Q969V3_VIYNLTEK_4_HexNAc(2)Hex(6)	18615	Q969V3	VIYNLTEK	N4GlcNAc	2	N2H6F0S0	3	N,9;	9	428	4	0.587088	62.86	17.9	1180.02	C97H161N12O54	2	88.29	18_adg_human_15ug_TR3_240615_f	BI2,YI3,YI3,	1180.02	2358.02	1180.02	1	0	01Y41Y41M(31M21M)61M(31M)61M	290.9	19	114.29
Q9P2K8_GNFSIRTAK_2_HexNAc(2)Hex(6)	11799	Q9P2K8	GNFSIRTAK	N2GlcNAc	3	N2H6F0S0	4	N,2;	2	1055	2	-0.935174	69.49	33.14	791.346	C95H159N16O53	1	55.23	02_RE_Liver_human_15ug_TR1_240613_f	BI2,ZI3,YI3,YI3,	791.68	2372.02	791.681	1	19.11	01Y41Y41M(31M)61M(31M21M)61M	290.9	12	37.5
P15586_TPMTNSSIQFLDNAFR_5_HexNAc(2)Hex(8)	33817	P15586	TPMTNSSIQFLDNAFR	N5GlcNAc	3	N2H8F0S0	3	N,4;	4	279	5	1.72205	29.39	15.98	1182.83	C144H231N24O76S1	2	162.7	18_adg_human_15ug_TR3_240615_f	CI3,04AI4,YI3,	1182.5	3544.47	1182.5	1	3.73	01Y41Y41M(31M21M)61M(31M21M)61M21M	290.88	26	80
Q9Y6Q3_SHTGEKPYECNECGKTFK_11_HexNAc(2)Hex(6)	10474	Q9Y6Q3	SHTGEKPYECNECGKTFK	C10CamN11GlcNAcC13Cam	3	N2H6F0S0	3	N,1;	1	604	11	-2.13971	20.58	16.9	1184.48	C143H225N28O72S2	1	48.57	02_RE_Liver_human_15ug_TR1_240613_f	BI2,YI3,YI3,	1184.48	3550.42	1184.48	1	5.12	01Y41Y41M(31M)61M(31M21M)61M	290.82	9	23.53
P23378_LNSSSELAPITWK_2_HexNAc(2)Hex(5)	24231	P23378	LNSSSELAPITWK	N2GlcNAc	3	N2H5F0S0	16	N,2;	2	563	2	6.64539	40.4	16.48	888.742	C111H181N18O56	1	122.84	human_kidney_9ug_TR1_0701_f	BI1,BII1,BIII1,BI2,YI1,YI2,14XI1,02XI1,ZI1,YI1,ZI2,YI2,ZI3,YI3,YI4,YII4,YIII3,02XI1,ZI1,YI1,	888.408	2662.19	888.402	1	0	01Y41Y41M(31M)61M(31M)61M	290.77	8	20.83
P02675_GTAGNALMDGASQLMGENR_18_HexNAc(4)Hex(6)Fuc(3)	30152	P02675	GTAGNALMDGASQLMGENR	N18GlcNAc	4	N4H6F3S0	0	N,11;	11	394	18	-0.87781	18.08	19.43	1029.92	C160H268N29O91S2	1	144.45	18_adg_human_15ug_TR1_240615_f		1030.17	4115.67	1030.17	2	9.28	01Y41Y41M(31M(21Y(31F)41L21F)41Y(31F)41L)61M61M	290.65	36	94.44
Q7Z7H5_FTFTSHTPGDHQICLHSNSTR_18_HexNAc(6)Hex(3)Fuc(3)	20634	Q7Z7H5	FTFTSHTPGDHQICLHSNSTR	C14CamN18GlcNAc	4	N6H3F3S0	0	N,6;	6	117	18	1.19957	36.87	23.57	1147.74	C188H294N39O91S1	1	98.35	18_adg_human_15ug_TR2_240615_f		1147.74	4585.93	1147.74	1	17.05	01Y41Y41M(31M(21Y31F)41Y31F)61M(21Y31F)61Y	290.6	18	42.5
Q4G148_KFNSTQIAAMAPEHEEPR_3_HexNAc(2)Hex(8)	22868	Q4G148	KFNSTQIAAMAPEHEEPR	N3GlcNAc	4	N2H8F0S0	3	N,6;	6	237	3	4.2034	41.1	20.71	941.153	C152H245N28O79S1	1	117.11	12_Tetis_human_8ug_TR2_231109_f	03AI4,YI3,YI3,	940.904	3758.57	940.901	1	2.29	01Y41Y41M(31M21M)61M(31M21M)61M21M	290.58	26	76.47
P15309_NETQHEPYPLMLPGCSPSCPLER_1_HexNAc(2)Hex(5)	31038	P15309	NETQHEPYPLMLPGCSPSCPLER	N1GlcNAcC15CamC19Cam	3	N2H5F0S0	11	N,6;	6	333	1	1.43551	29.27	19.38	1310.89	C161H255N34O73S3	1	146.56	17_Prostate_human_15ug_TR2_240619_f	BI1,BII1,BIII1,BI2,YI1,BI4,YI2,YI3,YI4,YII4,YIII3,02XI1,ZI1,YI1,YI2,	1310.89	3928.64	1310.89	1	0	01Y41Y41M(31M)61M(31M)61M	290.43	28	63.64
Q8NEM0_TVDITNFTAKTISSPR_6_HexNAc(2)Hex(5)	19773	Q8NEM0	TVDITNFTAKTISSPR	N6GlcNAc	4	N2H5F0S0	17	N,0;	0	475	6	0.265507	36.04	11.44	742.846	C122H204N23O61	1	94.16	18_adg_human_15ug_TR1_240615_f	BI1,BII1,BIII1,BI2,03AI4,03AI2,CI2,YI2,YI1,YI2,YI3,02XI1,YI4,YII4,YIII3,ZI1,YI1,ZI2,YI2,YI3,YI1,	742.846	2967.36	742.846	1	0	01Y41Y41M(31M)61M(31M)61M	290.41	7	20
P11047_NISQDLEK_1_HexNAc(5)Hex(3)Fuc(1)	17443	P11047	NISQDLEK	N1GlcNAc	2	N5H3F1S0	0	N,5;	5	1241	1	3.00095	45.03	12.07	1297.56	C103H173N16O60	1	85.79	10_Fat_human_15ug_TR3_231011_f		1298.06	2594.1	1298.05	1	13.4	01Y41Y41M(31M41Y)61M(21Y31F)61Y	290.01	22	128.57
Q16853_YLYLASNHSNKWGHPR_7_HexNAc(5)Hex(5)Fuc(1)	20676	Q16853	YLYLASNHSNKWGHPR	N7GlcNAc	4	N5H5F1S0	0	N,0;	0	592	7	2.29742	38.01	18.29	979.931	C165H253N32O77	1	100.36	10_Fat_human_15ug_TR3_231011_f		979.931	3914.69	979.929	1	1.51	01Y(61F)41Y41M(31M41Y41L31Y41L)61M61Y	289.95	14	43.33
Q5THJ4_QLNLTIR_3_HexNAc(2)Hex(6)	15617	Q5THJ4	QLNLTIR	N3GlcNAc	2	N2H6F0S0	4	N,1;	1	3263	3	1.15169	75.47	18.28	1119.01	C89H155N14O51	2	73.28	04_Stomach_human_15ug_TR3_240614_f	CI2,BI2,YI3,YI3,	1119	2236	1119	1	0	01Y41Y41M(31M21M)61M(31M)61M	289.8	11	75
P14625_TDDEVVQREEEAIQLDGLNASQIR_19_HexNAc(2)Hex(8)	30135	P14625	TDDEVVQREEEAIQLDGLNASQIR	N19GlcNAc	3	N2H8F0S0	0	N,5;	5	62	19	1.9579	48.87	24.07	1478.32	C176H293N36O95	1	145.79	16_Pancreas_human_15ug_TR1_240614_f		1478.32	4430.92	1478.31	1	4.66	01Y41Y41M(31M21M21M)61M(31M21M)61M	289.78	26	56.52
P16444_ANLSQVADHLDHIK_2_HexNAc(4)Hex(4)Fuc(1)	25947	P16444	ANLSQVADHLDHIK	N2GlcNAc	4	N4H4F1S0	0	N,11;	11	279	2	1.60317	27.81	21.02	792.858	C129H212N25O66	1	132.23	12_Tetis_human_8ug_TR2_231109_f		792.858	3167.4	792.857	2	1.85	01Y41Y41M(31M)61M(21Y41L)61Y31F	289.5	32	115.38
P07585_LGLSFNSISAVDNGSLANTPHLR_13_HexNAc(4)Hex(5)Fuc(2)	33220	P07585	LGLSFNSISAVDNGSLANTPHLR	N13GlcNAc	3	N4H5F2S0	0	N,4;	4	262	13	0.655505	29.8	21.42	1434.32	C177H290N35O87	1	157.35	17_Prostate_human_15ug_TR2_240619_f		1433.99	4297.93	1433.99	1	2.21	01Y(61F)41Y41M(31M41Y(31F)41L)61M61Y41L	289.39	31	68.18
P12109_ENYAELLEDAFLKNVTAQICIDK_14_HexNAc(3)Hex(5)NeuAc(1)	43363	P12109	ENYAELLEDAFLKNVTAQICIDK	N14GlcNAcC20Cam	3	N3H5F0S1	26	N,4;	4	804	14	1.53279	47.09	27.79	1470.99	C184H296N33O88S1	1	206.73	20_Oesophagus_human_15ug_TR3_240618_f_41393-	03AI2,02AII2,BII2,01AI2,BI1,BI2,BII1,CII1,BI2,34AII4,35AII4,02AII4,BII2,35AII3,BII3,35AII4,BII4,02XI1,ZI1,YI1,YII3,ZII4,YII4,YII5,YII6,YI1,	1470.66	4407.94	1470.65	1	0	01Y41Y41M(31M41Y41L32S)61M61M	289.38	28	61.36
P02549_QQRFNTSIR_5_HexNAc(2)Hex(6)	13473	P02549	QQRFNTSIR	N5GlcNAc	3	N2H6F0S0	4	N,0;	0	1613	5	-1.17825	30.21	12.62	843.367	C100H167N20O55	1	63.24	18_adg_human_15ug_TR2_240615_f	BI2,YI3,ZI3,YI3,	843.701	2528.09	843.702	1	2.38	01Y41Y41M(31M21M)61M(31M)61M	289.31	6	25
Q99715_NLQVYNATSNSLTVK_6_HexNAc(4)Hex(5)	24222	Q99715	NLQVYNATSNSLTVK	N6GlcNAc	3	N4H5F0S0	4	N,3;	3	1763	6	-0.134326	44.44	16.93	1092.82	C133H221N24O70	2	113.56	17_Prostate_human_15ug_TR1_240619_f	BII2,BII2,YII3,YII3,	1092.49	3274.45	1092.49	2	8.85	01Y41Y41M(31M(21Y41L)41Y)61M61M	289.2	26	82.14
P16444_ANLSQVADHLDHIK_2_HexNAc(3)Hex(6)Fuc(1)	25843	P16444	ANLSQVADHLDHIK	N2GlcNAc	4	N3H6F1S0	4	N,6;	6	279	2	-0.21499	23.74	15.05	823.364	C133H219N24O71	1	131.59	12_Tetis_human_8ug_TR1_231109_f	15AIII2,BIII1,BIII2,CIII2,	823.113	3288.43	823.113	1	1.9	01Y41Y41M(31M41Y41L21F)61M(31M)61M	289.06	27	96.15
P23229_ANHSGAVVLLK_2_HexNAc(2)Hex(5)	19228	P23229	ANHSGAVVLLK	N2GlcNAc	3	N2H5F0S0	12	N,9;	9	323	2	1.77424	33.1	10.98	776.031	C95H162N17O49	1	99.04	12_Tetis_human_8ug_TR2_231109_f	BI1,BII1,BIII1,BI2,YI2,02XI1,ZI1,YI1,ZI2,YI2,YI3,02XI1,YI1,YI2,	776.031	2325.07	776.03	1	0	01Y41Y41M(31M)61M(31M)61M	289.05	27	130
P23229_ANHSGAVVLLK_2_HexNAc(5)Hex(5)	16876	P23229	ANHSGAVVLLK	N2GlcNAc	3	N5H5F0S0	0	N,7;	7	323	2	-1.80698	54.35	26.42	979.109	C119H201N20O64	1	88.56	human_intestine_14ug_TR2_0704_f_new		979.107	2934.31	979.109	1	11.75	01Y41Y41M(31M41Y41L31Y41L)61M61Y	289.03	24	110
P02751_DQCIVDDITYNVNDTFHK_13_HexNAc(4)Hex(5)Fuc(2)NeuAc(1)	30500	P02751	DQCIVDDITYNVNDTFHK	C3CamN13GlcNAc	3	N4H5F2S1	3	N,9;	9	528	13	1.38464	39.77	22.51	1468.94	C179H281N30O95S1	1	146.19	18_adg_human_15ug_TR1_240615_f	25AII3,YII3,YII4,	1468.94	4402.78	1468.93	1	22.35	01Y41Y41M(31M21Y(31F)41L21F)61M61Y41L32S	288.81	32	91.18
P04233_MATPLLMQALPMGALPQGPMQNATK_22_HexNAc(2)Hex(6)	38150	P04233	MATPLLMQALPMGALPQGPMQNATK	N22GlcNAc	3	N2H6F0S0	2	N,12;	12	130	22	5.87755	39.3	15.2	1330.95	C165H279N32O72S4	2	190.19	11_Spleen_human_15ug_TR1_231108_f	BI2,BI2,	1330.95	3988.8	1330.94	1	0	01Y41Y41M(31M21M)61M(31M)61M	288.72	34	70.83
P07585_IADTNITSIPQGLPPSLTELHLDGNK_5_HexNAc(3)Hex(3)	34538	P07585	IADTNITSIPQGLPPSLTELHLDGNK	N5GlcNAc	3	N3H3F0S0	7	N,4;	4	211	5	0.295967	43.11	17.73	1281.29	C162H268N35O71	1	164.16	17_Prostate_human_15ug_TR3_240619_f	BI1,CI1,02AI2,BI2,CI2,YI3,YI4,	1281.29	3839.84	1281.29	1	39.07	01Y41Y41M(31M)61M61Y	288.55	29	58
P29622_FLNDTMAVYEAK_3_HexNAc(4)Hex(5)Fuc(1)	20151	P29622	FLNDTMAVYEAK	N3GlcNAc	3	N4H5F1S0	0	N,1;	1	157	3	2.78328	34.7	21.28	1057.78	C131H209N18O69S1	1	94.28	17_Prostate_human_15ug_TR3_240619_f		1057.78	3170.31	1057.78	2	3.03	01Y41Y41M(31M41Y(31F)41L)61M61Y41L	288.55	9	27.27
P23946_SITVTLGAHNITEEEDTWQK_10_HexNAc(2)Hex(6)	28853	P23946	SITVTLGAHNITEEEDTWQK	N10GlcNAc	3	N2H6F0S0	4	N,12;	12	80	10	1.96019	40.04	16.77	1217.54	C150H241N28O76	2	135.86	17_Prostate_human_15ug_TR2_240619_f	BI2,01AI2,BI2,YI3,	1217.87	3650.59	1217.87	1	0	01Y41Y41M(31M21M)61M(31M)61M	288.52	29	73.68
P11717_TNITLVCKPGDLESAPVLR_2_HexNAc(2)Hex(6)	27139	P11717	TNITLVCKPGDLESAPVLR	N2GlcNAcC7Cam	3	N2H6F0S0	4	N,5;	5	581	2	1.87164	26.86	12.08	1154.87	C142H242N27O69S1	1	129.87	18_adg_human_15ug_TR3_240615_f	BI2,CI2,YI3,YI3,	1154.87	3461.6	1154.87	1	11.59	01Y41Y41M(31M)61M(31M21M)61M	288.47	27	72.22
Q01118_YALLCGNR_7_HexNAc(2)Hex(8)	17836	Q01118	YALLCGNR	C5CamN7GlcNAc	2	N2H8F0S0	0	N,6;	6	309	7	-0.500799	82.69	26.8	1335.54	C105H174N15O62S1	1	93.21	human_lung_14ug_TR3_0626_f		1335.54	2669.06	1335.54	2	2.53	01Y41Y41M(31M21M21M)61M(31M21M)61M	288.42	17	107.14
Q8TDW5_ECRVAGPNGSWK_8_HexNAc(2)Hex(8)	15771	Q8TDW5	ECRVAGPNGSWK	C2CamN8GlcNAc	3	N2H8F0S0	3	N,0;	0	98	8	1.29574	39.06	15.7	1022.08	C121H196N21O68S1	1	75.22	02_RE_Liver_human_15ug_TR2_240613_f	45AI3,ZI3,YI3,	1022.08	3063.22	1022.08	1	7.16	01Y41Y41M(31M21M)61M(31M21M)61M21M	288.33	7	18.18
Q9BV73_ENLTAQVEHLQAAVVEAR_2_HexNAc(4)Hex(5)NeuAc(1)	37359	Q9BV73	ENLTAQVEHLQAAVVEAR	N2GlcNAc	3	N4H5F0S1	0	N,2;	2	1352	2	9.73848	46.58	15.33	1298.26	C157H260N31O82	1	179.11	21_Bladder_human_15ug_TR2_240619_f		1298.59	3891.71	1298.58	2	15.67	01Y41Y41M(31M)61M(21Y41L32S)61Y41L	288.29	7	17.65
P35398_RSQQSNATYSCPR_6_HexNAc(4)Hex(5)NeuAc(1)	20703	P35398	RSQQSNATYSCPR	N6GlcNAcC11Cam	3	N4H5F0S1	1	N,1;	1	104	6	9.32534	48.85	18.44	1157.48	C134H219N28O76S1	1	101.91	10_Fat_human_15ug_TR1_231011_f	35AI5,	1157.15	3468.39	1157.13	1	14.39	01Y41Y41M(31M41Y41L)61M61Y41L32S	287.98	6	20.83
Q8N3A8_TNDINCCLSIKSK_5_HexNAc(2)Hex(5)	21012	Q8N3A8	TNDINCCLSIKSK	N5GlcNAcC6CamC7Cam	2	N2H5F0S0	15	N,1;	1	100	5	6.51194	31.08	11.1	1385.6	C108H186N21O58S2	1	104.59	human_brain_14ug_TR3_0703_f	BI1,BII1,BIII1,BI2,ZI1,YI1,ZI2,YI2,BI4,ZI3,YI3,YI4,YII4,YIII3,MH,02XI1,ZI1,YI1,YI2,	1385.6	2769.17	1385.59	1	0	01Y41Y41M(31M)61M(31M)61M	287.76	10	29.17
Q07699_VVWNGSR_4_HexNAc(2)Hex(8)	14215	Q07699	VVWNGSR	N4GlcNAc	2	N2H8F0S0	0	N,3;	3	93	4	-0.92054	76.58	22.25	1261.01	C100H163N14O60	1	72.78	human_brain_14ug_TR3_0703_f		1261.01	2520.01	1261.01	2	4.98	01Y41Y41M(31M21M21M)61M(31M21M)61M	287.59	16	108.33
P13473_VASVININPNTTHSTGSCR_10_HexNAc(5)Hex(6)Fuc(1)NeuAc(2)	19831	P13473	VASVININPNTTHSTGSCR	N10GlcNAcC18Cam	3	N5H6F1S2	0	N,4;	4	257	10	2.19221	41.17	22.4	1583	C186H308N35O105S1	1	94.31	18_adg_human_15ug_TR3_240615_f		1582.66	4743.96	1582.66	1	2.09	01Y41Y41M(31M41Y41L)61M(21Y(31F)41L32S)61Y41L32S	287.58	22	55.56
P49019_ITGEPDNNRSTSVELTGDPNK_8_HexNAc(2)Hex(5)	16352	P49019	ITGEPDNNRSTSVELTGDPNK	N8GlcNAc	3	N2H5F0S0	17	N,0;	0	324	8	2.54623	37.26	11.49	1154.51	C137H227N30O73	1	76.87	04_Stomach_human_15ug_TR3_240614_f	BI1,BII1,BIII1,BI2,25AI3,ZI1,ZI2,YI2,YI3,BI4,YI4,YII4,YIII3,MH,02XI1,ZI1,YI1,ZI2,YI2,YI3,YI1,	1154.51	3460.5	1154.51	1	0	01Y41Y41M(31M)61M(31M)61M	287.56	6	12.5
P10619_LWSSLQTHCCSQNK_13_HexNAc(2)Hex(6)	18431	P10619	LWSSLQTHCCSQNK	C9CamC10CamN13GlcNAc	3	N2H6F0S0	2	N,8;	8	244	13	0.64967	36.43	19.58	1043.43	C124H200N25O64S2	2	87.43	18_adg_human_15ug_TR2_240615_f	BI2,YI3,	1043.43	3127.26	1043.43	1	0	01Y41Y41M(31M21M)61M(31M)61M	287.5	28	103.85
Q6IA86_ENTFTIENESVK_8_HexNAc(5)Hex(4)	16718	Q6IA86	ENTFTIENESVK	N8GlcNAc	3	N5H4F0S0	0	N,1;	1	264	8	-0.348322	54.74	19.5	1025.77	C124H201N20O69	1	86.47	human_kidney_9ug_TR1_0701_f		1025.77	3074.28	1025.77	1	15.18	01Y41Y41M(31M41Y41L31Y)61M61Y	287.46	8	22.73
Q13510_TVLENSTSYEEAK_5_HexNAc(2)Hex(8)	16535	Q13510	TVLENSTSYEEAK	N5GlcNAc	2	N2H8F0S0	0	N,3;	3	259	5	3.36414	56.9	33.33	1588.15	C126H206N17O76	1	77.42	20_Oesophagus_human_15ug_TR3_240618_f		1587.65	3173.28	1587.64	1	2.52	01Y41Y41M(31M21M21M)61M(31M21M)61M	287.33	25	91.67
P05106_DAVNCTYKNEDDCVVR_4_HexNAc(2)Hex(5)	17924	P05106	DAVNCTYKNEDDCVVR	N4GlcNAcC5CamC13Cam	3	N2H5F0S0	13	N,2;	2	680	4	2.22075	37.81	12.58	1059.43	C124H201N26O66S2	1	90.55	11_Spleen_human_15ug_TR3_231108_f	BI1,BII1,BIII1,BI2,35AI2,01AI3,24AI4,YI1,YI2,02XI1,ZI1,YI1,YI2,YI3,YI1,	1059.1	3174.26	1059.09	1	0	01Y41Y41M(31M)61M(31M)61M	287.19	25	80
Q66GS9_LQLELNLCQKEK_6_HexNAc(2)Hex(7)	23777	Q66GS9	LQLELNLCQKEK	N6GlcNAcC8Cam	3	N2H7F0S0	2	N,1;	1	373	6	2.82034	38.63	15.25	1019.79	C123H211N20O66S1	1	118.1	human_brain_14ug_TR3_0703_f	YI3,YI3,	1019.79	3056.35	1019.79	2	7.1	01Y41Y41M(31M)61M(31M21M)61M21M	287.05	6	18.18
O95490_GPDLSNCTSHWVNQLAQK_6_HexNAc(2)Hex(5)	24450	O95490	GPDLSNCTSHWVNQLAQK	N6GlcNAcC7Cam	3	N2H5F0S0	14	N,3;	3	520	6	0.372412	38.1	15.45	1091.14	C133H212N29O64S1	1	123.58	human_brain_14ug_TR1_0703_f_new	BI1,BII1,BIII1,BI2,24AI4,YI1,YI2,YI3,YI4,YII4,YIII3,02XI1,ZI1,YI1,YI2,YI3,YI4,YII4,YIII3,YI1,	1091.47	3271.39	1091.47	1	0	01Y41Y41M(31M)61M(31M)61M	287.05	22	61.76
P98160_TRNQELEDNVHISPNGSIITIVGTRPSNHGTYR_15_HexNAc(4)Hex(3)Fuc(1)	25383	P98160	TRNQELEDNVHISPNGSIITIVGTRPSNHGTYR	N15GlcNAc	6	N4H3F1S0	3	N,0;	0	3072	15	2.4892	36.85	17.49	854.739	C211H344N55O92	1	122.3	15_bigintes_human_15ug_TR2_240616_f	CI2,YI3,YI3,	854.575	5120.39	854.573	1	11.37	01Y41Y41M(31M)61M(21Y31F)61Y	287.02	18	28.13
P07585_LGLSFNSISAVDNGSLANTPHLR_13_HexNAc(4)Hex(5)Fuc(1)NeuAc(2)	32215	P07585	LGLSFNSISAVDNGSLANTPHLR	N13GlcNAc	4	N4H5F1S2	1	N,4;	4	262	13	3.19135	34.72	16.4	1185.27	C193H314N37O99	1	155.19	15_bigintes_human_15ug_TR2_240616_f	YI3,	1184.78	4734.07	1184.77	2	2.33	01Y41Y41M(31M)61M(21Y(31F)41L32S)61Y41L32S	287.01	32	70.45
Q9Y4C4_GKPLNGSTAWYK_5_HexNAc(2)Hex(7)	15818	Q9Y4C4	GKPLNGSTAWYK	N5GlcNAc	3	N2H7F0S0	3	N,2;	2	842	5	1.19487	44.53	16.96	955.08	C119H189N18O62	1	75.33	02_RE_Liver_human_15ug_TR3_240613_f	35AI3,ZI3,YI3,	955.08	2862.22	955.079	1	2.43	01Y41Y41M(31M)61M(31M21M)61M21M	286.89	10	31.82
Q9UHG3_GELNTSIFSSRPIDK_4_HexNAc(3)Hex(3)	27664	Q9UHG3	GELNTSIFSSRPIDK	N4GlcNAc	3	N3H3F0S0	8	N,3;	3	353	4	0.857181	44.04	12.4	920.761	C114H188N23O55	1	133.27	10_Fat_human_15ug_TR2_231011_f	BI1,CI1,02AI2,15AI2,BI2,CI2,YI3,YI4,	920.761	2759.26	920.76	1	26.37	01Y41Y41M(31M)61M61Y	286.83	23	75
Q9UJ14_RNESHLIDFR_2_HexNAc(2)Hex(7)	18031	Q9UJ14	RNESHLIDFR	N2GlcNAc	3	N2H7F0S0	5	N,3;	3	198	2	-2.71538	52.67	17.21	943.065	C113H184N21O62	1	90.62	human_brain_14ug_TR3_0703_f	BI2,04AI3,YI3,ZI3,YI3,	943.4	2827.19	943.402	1	10.19	01Y41Y41M(31M21M)61M(31M21M)61M	286.74	14	66.67
P04004_NGSLFAFR_1_HexNAc(2)Hex(9)	26292	P04004	NGSLFAFR	N1GlcNAc	2	N2H9F0S0	0	N,2;	2	169	1	0.134798	70.17	19.21	1389.06	C112H179N14O66	1	127.52	02_RE_Liver_human_15ug_TR2_240613_f		1389.06	2776.11	1389.06	2	2.37	01Y41Y41M(31M21M21M)61M(31M21M)61M21M	286.62	16	100
P51884_LHINHNNLTESVGPLPK_7_HexNAc(5)Hex(5)NeuAc(2)	23252	P51884	LHINHNNLTESVGPLPK	N7GlcNAc	4	N5H5F0S2	2	N,9;	9	127	7	2.25631	39.9	19.31	1073.98	C175H285N32O91	1	108.35	21_Bladder_human_15ug_TR1_240619_f	BIII2,CIII2,	1073.98	4290.87	1073.97	1	6	01Y41Y41M(31M41Y)61M(21Y41L32S)61Y41L32S	286.54	25	71.88
Q9NY72_LQWNGSK_4_HexNAc(2)Hex(5)	14569	Q9NY72	LQWNGSK	N4GlcNAc	2	N2H5F0S0	15	N,6;	6	95	4	-1.09318	61.28	14.58	1024.93	C83H134N13O46	1	75.58	human_brain_14ug_TR2_0703_f	BI1,BII1,BIII1,02XI1,BI2,YI1,02XI2,YI2,ZI3,YI3,02XI1,YI4,YII4,YIII3,BI4,ZI1,YI1,YI2,YI3,	1024.93	2048.85	1024.93	1	0	01Y41Y41M(31M)61M(31M)61M	286.45	18	133.33
Q6P179_NISDISENLK_1_HexNAc(2)Hex(7)	26228	Q6P179	NISDISENLK	N1GlcNAc	2	N2H7F0S0	3	N,3;	3	714	1	-0.413912	47.05	13.33	1337.56	C105H178N15O64	1	126.33	16_Pancreas_human_15ug_TR1_240614_f	BI2,BIII3,YI3,YIII3,YI3,YIII3,	1337.56	2673.11	1337.56	2	2.28	01Y41Y41M(31M21M21M)61M(31M)61M	286.26	14	61.11
P63010_IQPGNPNYTLSLK_7_HexNAc(2)Hex(5)	25100	P63010	IQPGNPNYTLSLK	N7GlcNAc	2	N2H5F0S0	19	N,1;	1	911	7	8.76996	39.48	10.51	1331.62	C111H182N19O55	1	119.95	18_adg_human_15ug_TR1_240615_f	01AI1,01AII1,01AIII1,BI1,BII1,BIII1,BI2,14XI1,02XI1,ZI1,YI1,ZI2,YI2,BI4,ZI3,YI3,ZI4,ZII4,ZIII3,YI4,YII4,YIII3,MH,02XI1,ZI1,YI1,YI2,	1331.62	2661.2	1331.61	1	0	01Y41Y41M(31M)61M(31M)61M	286.19	7	20.83
P21810_LLQVVYLHSNNITK_11_HexNAc(6)Hex(3)Fuc(2)	26193	P21810	LLQVVYLHSNNITK	N11GlcNAc	3	N6H3F2S0	0	N,6;	6	311	11	1.41583	39.16	15.71	1213.9	C153H253N26O74	1	122.67	17_Prostate_human_15ug_TR1_240619_f		1213.9	3638.68	1213.9	1	4.28	01Y41Y41M(31M(21Y31F)41Y)61M(21Y31F)61Y	286.16	24	84.62
Q9H9A7_NVSEQMTNEDKSFGCPSVR_1_HexNAc(2)Hex(7)	21307	Q9H9A7	NVSEQMTNEDKSFGCPSVR	N1GlcNAcC15Cam	3	N2H7F0S0	4	N,1;	1	377	1	7.91477	34.99	13.39	1243.18	C146H238N29O79S2	1	108.85	human_kidney_9ug_TR1_0701_f	BI2,BIII3,BI2,BIII3,YI3,YIII3,YI3,YIII3,	1243.18	3725.49	1243.17	1	6.72	01Y41Y41M(31M21M21M)61M(31M)61M	286.16	6	13.89
Q93015_APNLTAQAAPR_3_HexNAc(2)Hex(6)	24575	Q93015	APNLTAQAAPR	N3GlcNAc	2	N2H6F0S0	4	N,1;	1	226	3	-2.24562	59.94	12.35	1245.04	C99H167N18O55	1	118.84	10_Fat_human_15ug_TR2_231011_f	BI2,ZI3,YI3,YI3,	1245.04	2488.08	1245.05	1	11.8	01Y41Y41M(31M)61M(31M21M)61M	286.16	10	30
P12110_NMTLFSDLVAEK_1_HexNAc(4)Hex(5)Fuc(1)NeuAc(1)	33686	P12110	NMTLFSDLVAEK	N1GlcNAc	3	N4H5F1S1	0	N,5;	5	785	1	1.97381	42.56	19.44	1143.48	C139H228N19O77S1	1	160.54	19_Ovarian_human_15ug_TR1_240617_f		1143.48	3427.42	1143.48	2	1.84	01Y41Y41M(31M)61M(21Y(31F)41L32S)61Y41L	286.11	27	109.09
P11717_MNFTGGDTCHK_2_HexNAc(2)Hex(9)	13071	P11717	MNFTGGDTCHK	N2GlcNAcC9Cam	3	N2H9F0S0	1	N,5;	5	1312	2	0.527625	47.24	24.86	1045.39	C121H195N18O73S2	1	61.22	18_adg_human_15ug_TR3_240615_f	35AI3,	1045.06	3132.15	1045.06	1	14.75	01Y41Y41M(31M21M21M)61M(31M21M)61M21M	286.1	21	95
P02790_SWPAVGNCSSALR_7_HexNAc(4)Hex(5)NeuAc(2)	25009	P02790	SWPAVGNCSSALR	N7GlcNAcC8Cam	3	N4H5F0S2	0	N,2;	2	187	7	2.82961	46.18	26.87	1204.49	C143H230N25O80S1	1	118.02	21_Bladder_human_15ug_TR2_240619_f		1204.16	3609.44	1204.15	1	1.6	01Y41Y41M(31M)61M(21Y41L32S)61Y41L32S	285.99	19	66.67
P16671_NCTSYGVLDISK_1_HexNAc(4)Hex(5)Fuc(1)	24105	P16671	NCTSYGVLDISK	N1GlcNAcC2Cam	3	N4H5F1S0	0	N,3;	3	321	1	2.4329	32.03	18.17	1042.77	C125H206N19O70S1	1	118.09	10_Fat_human_15ug_TR1_231011_f		1042.77	3125.29	1042.77	2	1.08	01Y41Y41M(31M41Y(31F)41L)61M61Y41L	285.9	27	109.09
Q3SY77_VSQILQDHGHNVTMLNHK_11_HexNAc(2)Hex(6)	20739	Q3SY77	VSQILQDHGHNVTMLNHK	N11GlcNAc	4	N2H6F0S0	4	N,2;	2	52	11	4.65589	43.41	22.84	863.641	C140H230N31O67S1	2	106.37	12_Tetis_human_8ug_TR1_231109_f	BI2,CI2,YI3,YI3,	863.392	3449.53	863.388	1	0	01Y41Y41M(31M21M)61M(31M)61M	285.87	18	50
Q92542_IYIPLNK_6_HexNAc(2)Hex(9)	21085	Q92542	IYIPLNK	N6GlcNAc	2	N2H9F0S0	1	N,4;	4	45	6	1.78143	58.42	20.04	1363.59	C112H186N11O65	1	101.61	02_RE_Liver_human_15ug_TR2_240613_f	45AI4,	1363.59	2725.16	1363.58	1	4.83	01Y41Y41M(31M21M21M)61M(31M21M)61M21M	285.76	15	116.67
P16444_ANLTTLAGTHTNIPK_2_HexNAc(4)Hex(5)NeuAc(2)	24223	P16444	ANLTTLAGTHTNIPK	N2GlcNAc	3	N4H5F0S2	3	N,7;	7	57	2	3.03227	39.62	21.9	1253.55	C151H251N26O83	1	123.62	12_Tetis_human_8ug_TR1_231109_f	BIII1,YI3,YI3,	1253.22	3756.62	1253.21	2	0	01Y41Y41M(31M)61M(21Y41L32S)61Y41L32S	285.76	23	75
Q9NRM6_GTVVLCPQTGVPFPLDNNK_18_HexNAc(2)Hex(9)	37703	Q9NRM6	GTVVLCPQTGVPFPLDNNK	C6CamN18GlcNAc	4	N2H9F0S0	0	N,1;	1	283	18	-2.99003	40.27	16.43	981.426	C161H263N26O83S1	1	184.13	02_RE_Liver_human_15ug_TR3_240613_f		981.426	3920.69	981.429	2	14.66	01Y41Y41M(31M21M21M31G31G)61M(31M)61M	285.7	9	22.22
P05556_CHEGNGTFECGACR_5_HexNAc(2)Hex(8)	11269	P05556	CHEGNGTFECGACR	C1CamN5GlcNAcC10CamC13Cam	3	N2H8F0S0	1	N,4;	4	481	5	0.505053	51.21	33.25	1120.41	C127H202N25O74S3	1	52.39	18_adg_human_15ug_TR2_240615_f	02AI2,	1120.07	3357.2	1120.07	2	7.44	01Y41Y41M(31M21M21M)61M(31M21M)61M	285.67	24	84.62
Q99538_SHTNTSHVMQYGNK_4_HexNAc(3)Hex(5)	10853	Q99538	SHTNTSHVMQYGNK	N4GlcNAc	3	N3H5F0S0	0	N,8;	8	263	4	-0.465385	48.63	30.82	1008.75	C120H192N25O63S1	1	50.47	02_RE_Liver_human_15ug_TR1_240613_f		1008.75	3023.23	1008.75	1	5.53	01Y41Y41M(31M)(41Y)61M(31M)61M	285.66	23	84.62
Q16363_HVNEINATIYLLK_6_HexNAc(5)Hex(5)Fuc(1)	30668	Q16363	HVNEINATIYLLK	N6GlcNAc	3	N5H5F1S0	0	N,7;	7	315	6	1.32098	34.86	13.79	1167.87	C146H240N23O74	1	147.7	10_Fat_human_15ug_TR2_231011_f		1167.53	3499.57	1167.53	1	0.04	01Y41Y41M(31M41Y41L31Y)61M61Y(31F)41L	285.58	25	100
Q86UQ4_NLDSINDFLSNNLTNYGEK_12_HexNAc(2)Hex(6)	19906	Q86UQ4	NLDSINDFLSNNLTNYGEK	N12GlcNAc	4	N2H6F0S0	6	N,0;	0	1312	12	-7.27366	34.35	10.65	888.375	C145H230N27O75	1	100.39	human_brain_14ug_TR2_0703_f	BI2,BI2,BI2,04AI3,YI3,YI3,	888.375	3549.5	888.382	1	4.19	01Y41Y41M(31M)61M(31M21M)61M	285.06	6	16.67
O95479_DVLQNHLTEVLTLVAMELPHNVSSAEAVLR_21_HexNAc(2)Hex(7)	45977	O95479	DVLQNHLTEVLTLVAMELPHNVSSAEAVLR	N21GlcNAc	4	N2H7F0S0	3	N,7;	7	282	21	0.827667	37.43	13.86	1211.58	C202H337N42O91S1	2	223.76	18_adg_human_15ug_TR1_240615_f	BI2,BIII3,BI2,BIII3,YI3,YIII3,	1211.08	4839.28	1211.08	2	0	01Y41Y41M(31M21M21M)61M(31M)61M	284.97	34	58.62
Q12959_HVTSNASDSESSYR_5_HexNAc(2)Hex(5)	12361	Q12959	HVTSNASDSESSYR	N5GlcNAc	3	N2H5F0S0	17	N,1;	1	685	5	-0.487573	36.54	15.78	920.039	C107H171N22O62	1	56	17_Prostate_human_15ug_TR1_240619_f	BI1,BII1,BIII1,BI2,01AI3,YI1,YI2,YI3,02XI1,ZI1,YI1,ZI2,YI2,ZI3,YI3,YI4,YII4,YIII3,02XI1,ZI1,YI1,	919.702	2756.09	919.703	1	0	01Y41Y41M(31M)61M(31M)61M	284.95	10	30.77
P21810_LLQVVYLHSNNITK_11_HexNAc(5)Hex(5)Fuc(1)NeuAc(1)	27340	P21810	LLQVVYLHSNNITK	N11GlcNAc	3	N5H5F1S1	0	N,7;	7	311	11	2.3288	52.51	16.81	1302.59	C162H267N26O83	1	138.75	12_Tetis_human_8ug_TR3_231109_f		1302.93	3904.75	1302.92	1	2.62	01Y41Y41M(31M41Y)61M61Y(31F)41L31Y41L32S	284.92	28	100
P42694_NGKSDTNNSGPEINK_7_HexNAc(2)Hex(7)	20796	P42694	NGKSDTNNSGPEINK	N7GlcNAc	3	N2H7F0S0	3	N,2;	2	1285	7	0.320782	27.11	13.22	1039.43	C120H200N23O72	2	103.54	human_brain_14ug_TR3_0703_f	YI3,ZI3,YI3,	1039.43	3115.27	1039.43	1	2.3	01Y41Y41M(31M)61M(31M21M)61M21M	284.91	10	28.57
Q86TU7_SNAEFVIHSGFFFDNNSHDR_15_HexNAc(2)Hex(7)	23902	Q86TU7	SNAEFVIHSGFFFDNNSHDR	N15GlcNAc	3	N2H7F0S0	5	N,0;	0	331	15	6.57114	35.24	12.56	1294.87	C162H239N32O78	1	115.5	02_RE_Liver_human_15ug_TR3_240613_f	BI2,BIII3,BI2,BIII3,35AI3,YI3,YIII3,YI3,YIII3,	1294.87	3880.57	1294.86	2	2.2	01Y41Y41M(31M21M21M)61M(31M)61M	284.87	7	15.79
P19022_SNISILR_2_HexNAc(2)Hex(5)	17623	P19022	SNISILR	N2GlcNAc	2	N2H5F0S0	18	N,2;	2	692	2	-2.05401	81.82	11.29	1009.95	C80H140N13O46	1	89.81	human_brain_14ug_TR2_0703_f	BI1,BII1,BIII1,CI1,CII1,CIII1,25AI2,02XI1,BI2,YI1,ZI2,YI2,YI3,02XI1,YI4,YII4,YIII3,ZI1,YI1,MH,BI4,ZI2,YI2,YI3,	1009.95	2018.9	1009.95	1	0	01Y41Y41M(31M)61M(31M)61M	284.82	15	100
P13473_VQPFNVTQGK_5_HexNAc(3)Hex(5)	17651	P13473	VQPFNVTQGK	N5GlcNAc	2	N3H5F0S0	4	N,2;	2	356	5	1.19291	40.14	19.8	1269.56	C104H170N17O55	1	83.61	18_adg_human_15ug_TR3_240615_f	BII3,CII3,YII3,YII3,	1269.56	2537.1	1269.56	1	36.04	01Y41Y41M(31M41Y41L)61M61M	284.81	19	88.89
P12111_QLINALQINNTAVGHALVLPAGR_9_HexNAc(4)Hex(4)Fuc(1)	32953	P12111	QLINALQINNTAVGHALVLPAGR	N9GlcNAc	3	N4H4F1S0	0	N,1;	1	2558	9	-2.30409	44.73	19.52	1331.66	C167H282N37O74	1	153.89	15_bigintes_human_15ug_TR1_240616_f		1331.32	3989.94	1331.32	2	0.86	01Y41Y41M(31M41Y(31F)41L)61M61Y	284.75	25	52.27
Q9Y6R7_VVTVAALGTNISIHKDEIGK_10_HexNAc(6)Hex(6)	24091	Q9Y6R7	VVTVAALGTNISIHKDEIGK	N10GlcNAc	4	N6H6F0S0	0	N,1;	1	1743	10	1.60172	44.4	22.6	1065	C175H296N31O89	1	116.17	15_bigintes_human_15ug_TR3_240616_f		1065.25	4255.96	1065.25	1	16.94	01Y41Y41M(31M41Y41L31Y41L)61M61Y41L31Y	284.71	18	44.74
P06681_QSVPAHFVALNGSK_11_HexNAc(2)Hex(7)	21533	P06681	QSVPAHFVALNGSK	N11GlcNAc	3	N2H7F0S0	4	N,6;	6	621	11	1.14017	36.4	16.4	999.442	C123H200N21O64	1	100.03	21_Bladder_human_15ug_TR1_240619_f	BI2,BIII3,BI2,BIII3,ZI3,ZIII3,YI3,YIII3,	999.442	2995.3	999.441	1	17.16	01Y41Y41M(31M21M21M)61M(31M)61M	284.39	28	100
Q07954_GVTHLNISGLK_6_HexNAc(5)Hex(5)Fuc(1)	21515	Q07954	GVTHLNISGLK	N6GlcNAc	3	N5H5F1S0	0	N,6;	6	3953	6	0.898514	39.69	17.45	1037.8	C126H213N20O69	1	102.66	18_adg_human_15ug_TR2_240615_f		1037.8	3110.38	1037.8	1	7.94	01Y(61F)41Y41M(31M41Y41L31Y41L)61M61Y	284.37	19	90
Q9UHL4_ALAGLVYNASGSEHCYDIYR_8_HexNAc(2)Hex(3)	28235	Q9UHL4	ALAGLVYNASGSEHCYDIYR	N8GlcNAcC15Cam	3	N2H3F0S0	12	N,2;	2	315	8	1.28567	30.8	10.6	1051.46	C133H204N29O57S1	1	135.25	18_adg_human_15ug_TR2_240615_f	03AI2,BI1,BII1,BI2,03AI2,CI2,BI3,YI1,02XI1,ZI1,YI1,YI2,YI3,YII3,	1051.46	3151.37	1051.46	1	0	01Y41Y41M(31M)61M	284.32	24	63.16
P26006_SLDAYPILNQAQALENHTEVQFQK_16_HexNAc(2)Hex(7)	36830	P26006	SLDAYPILNQAQALENHTEVQFQK	N16GlcNAc	3	N2H7F0S0	4	N,4;	4	605	16	0.371481	27.25	14.89	1433.98	C180H286N35O85	1	175.17	17_Prostate_human_15ug_TR2_240619_f	BI2,BIII3,BI2,BIII3,YI3,YIII3,YI3,YIII3,	1433.98	4297.91	1433.98	1	12.74	01Y41Y41M(31M21M21M)61M(31M)61M	284.31	24	52.17
P18850_KENGTLK_3_HexNAc(2)Hex(8)	11592	P18850	KENGTLK	N3GlcNAc	2	N2H8F0S0	0	N,2;	2	352	3	0.487989	64.54	17.98	1247.02	C97H167N12O62	1	53.69	16_Pancreas_human_15ug_TR1_240614_f		1247.02	2492.03	1247.02	2	14.43	01Y41Y41M(31M21M21M)61M(31M21M)61M	284.2	10	66.67
Q9UHF5_NSSELAQR_1_HexNAc(2)Hex(7)	16939	Q9UHF5	NSSELAQR	N1GlcNAc	2	N2H7F0S0	4	N,0;	0	75	1	7.01467	86.67	20.17	1223	C93H158N15O60	2	80.24	18_adg_human_15ug_TR2_240615_f	ZI3,YI3,04XI3,YI3,	1223.5	2444.98	1223.49	1	15.39	01Y41Y41M(31M)61M(31M21M)61M21M	284.15	7	28.57
P55083_VDLEDFENNTAYAK_8_HexNAc(4)Hex(5)Fuc(1)	27598	P55083	VDLEDFENNTAYAK	N8GlcNAc	3	N4H5F1S0	0	N,3;	3	137	8	2.28917	33.55	21.67	1133.8	C139H218N21O76	1	132.95	10_Fat_human_15ug_TR2_231011_f		1133.47	3397.38	1133.47	2	1.73	01Y41Y41M(31M)61M(21Y(31F)41L)61Y41L	284.14	28	96.15
Q99715_MLEAYNLTEK_6_HexNAc(2)Hex(6)	23294	Q99715	MLEAYNLTEK	N6GlcNAc	2	N2H6F0S0	3	N,3;	3	2528	6	5.15888	42.5	16.58	1296.05	C105H173N14O58S1	1	109.16	17_Prostate_human_15ug_TR2_240619_f	BI2,YI3,YI3,	1296.05	2590.07	1296.04	1	8.38	01Y41Y41M(31M)61M(31M21M)61M	284.13	22	105.56
Q9H061_ENITIVDISR_2_HexNAc(2)Hex(6)	23113	Q9H061	ENITIVDISR	N2GlcNAc	2	N2H6F0S0	4	N,1;	1	11	2	-3.24181	51.35	13.04	1270.06	C101H173N16O58	1	110.35	18_adg_human_15ug_TR1_240615_f	BI2,ZI3,YI3,YI3,	1270.06	2538.11	1270.06	1	2.38	01Y41Y41M(31M21M)61M(31M)61M	284.07	8	27.78
Q14112_IHQNITYQVCR_4_HexNAc(5)Hex(5)Fuc(1)	18363	Q14112	IHQNITYQVCR	N4GlcNAcC10Cam	3	N5H5F1S0	0	N,1;	1	703	4	1.97837	34.77	13.73	1135.82	C137H224N25O72S1	1	89.72	10_Fat_human_15ug_TR2_231011_f		1135.49	3403.44	1135.48	1	3.07	01Y41Y41M(31M41Y41L31Y)61M61Y(31F)41L	283.86	14	65
P11047_NISQDLEK_1_HexNAc(4)Hex(5)Fuc(1)	17227	P11047	NISQDLEK	N1GlcNAc	2	N4H5F1S0	0	N,6;	6	1241	1	1.09349	36	14.38	1359.07	C107H180N15O65	1	84.59	10_Fat_human_15ug_TR2_231011_f		1358.57	2715.12	1358.57	1	0.06	01Y41Y41M(31M41Y(31F)41L)61M61Y41L	283.75	23	135.71
O95302_YHYNGTFLDGTLFDSSHNR_4_HexNAc(6)Hex(3)	27851	O95302	YHYNGTFLDGTLFDSSHNR	N4GlcNAc	4	N6H3F0S0	0	N,6;	6	174	4	-13.2661	41.37	24.58	988.406	C166H247N34O77	1	142	human_lung_14ug_TR2_0625_f		988.406	3948.65	988.419	2	0	01Y41Y41M(31M(21Y)41Y)61M(21Y)61Y	283.69	28	75
P16444_ANLSQVADHLDHIK_2_HexNAc(3)Hex(6)NeuAc(1)	27638	P16444	ANLSQVADHLDHIK	N2GlcNAc	4	N3H6F0S1	9	N,6;	6	279	2	2.0929	45.32	20.25	859.625	C138H226N25O75	1	140.22	12_Tetis_human_8ug_TR3_231109_f	02AIII2,BIII2,BIII3,BIII1,CIII1,35AIII4,BIII2,35AIII3,BIII3,	859.374	3433.46	859.372	1	11.64	01Y41Y41M(31M41Y41L32S)61M(31M)61M	283.65	27	96.15
P01009_YLGNATAIFFLPDEGK_4_HexNAc(4)Hex(5)NeuAc(1)	37370	P01009	YLGNATAIFFLPDEGK	N4GlcNAc	3	N4H5F0S1	2	N,6;	6	271	4	1.41437	46.48	17.65	1224.2	C156H242N23O77	1	178.53	21_Bladder_human_15ug_TR3_240619_f	YI3,YI3,	1224.2	3669.57	1224.2	2	1.94	01Y41Y41M(31M)61M(21Y41L32S)61Y41L	283.62	28	86.67
Q9HCK8_DGNITGIQQFSKK_3_HexNAc(2)Hex(8)	21782	Q9HCK8	DGNITGIQQFSKK	N3GlcNAc	3	N2H8F0S0	2	N,1;	1	1291	3	1.54128	38.02	10.92	1047.12	C126H209N20O71	1	104.95	02_RE_Liver_human_15ug_TR3_240613_f	YI3,YI3,	1047.12	3138.34	1047.12	1	4.55	01Y41Y41M(31M21M)61M(31M21M)61M21M	283.59	8	20.83
P36269_GFNFSTESMARPEGR_3_HexNAc(4)Hex(5)Fuc(1)	23126	P36269	GFNFSTESMARPEGR	N3GlcNAc	3	N4H5F1S0	0	N,1;	1	303	3	0.107845	47.22	29.3	1152.81	C139H221N26O73S1	1	110.42	18_adg_human_15ug_TR1_240615_f		1152.48	3454.41	1152.48	2	3.53	01Y41Y41M(31M41Y(31F)41L)61M61Y41L	283.51	10	32.14
Q9HDC9_NMSFVNDLTVTQDGR_1_HexNAc(2)Hex(6)	27431	Q9HDC9	NMSFVNDLTVTQDGR	N1GlcNAc	3	N2H6F0S0	5	N,3;	3	196	1	0.760337	28.01	13.86	1026.76	C122H200N23O66S1	1	131.31	18_adg_human_15ug_TR2_240615_f	BI2,BI2,04AI3,ZI3,YI3,	1026.1	3075.27	1026.1	1	9.61	01Y41Y41M(31M)61M(31M21M)61M	283.42	26	85.71
P51888_IHYLYLQNNFITELPVESFQNATGLR_21_HexNAc(4)Hex(5)Fuc(1)NeuAc(2)	42857	P51888	IHYLYLQNNFITELPVESFQNATGLR	N21GlcNAc	4	N4H5F1S2	1	N,10;	10	124	21	2.71042	41	21.37	1359.12	C232H361N42O106	1	204.62	17_Prostate_human_15ug_TR2_240619_f	YI3,	1359.37	5431.41	1359.36	1	7.96	01Y41Y41M(31M)61M(21Y(31F)41L32S)61Y41L32S	283.13	32	64
P11215_KAPVVNCSIAVCQR_6_HexNAc(2)Hex(8)	19044	P11215	KAPVVNCSIAVCQR	N6GlcNAcC7CamC12Cam	3	N2H8F0S0	4	N,2;	2	1021	6	-0.142846	39.83	15.84	1102.14	C130H223N24O70S2	1	96.2	11_Spleen_human_15ug_TR2_231108_f	45AI3,04AI4,YI3,YI3,	1102.47	3304.41	1102.48	1	10.69	01Y41Y41M(31M21M)61M(31M21M)61M21M	282.96	21	76.92
P01591_ENISDPTSPLR_2_HexNAc(5)Hex(4)	20316	P01591	ENISDPTSPLR	N2GlcNAc	3	N5H4F0S0	1	N,2;	2	71	2	1.02412	50.38	16.34	965.082	C115H191N20O65	1	94.1	21_Bladder_human_15ug_TR1_240619_f	34AII4,	965.082	2892.23	965.081	1	25.38	01Y41Y41M(31M41Y41L31Y)61M61Y	282.95	16	65
P01903_FTPPVVNVTWLR_7_HexNAc(2)Hex(7)	34866	P01903	FTPPVVNVTWLR	N7GlcNAc	2	N2H7F0S0	4	N,4;	4	143	7	1.1885	44.66	17.92	1486.18	C127H202N19O61	1	172.82	11_Spleen_human_15ug_TR3_231108_f_24580-	BI2,ZI3,YI3,YI3,	1485.67	2969.33	1485.67	1	2.34	01Y41Y41M(31M21M)61M(31M21M)61M	282.94	19	72.73
Q15293_VVRPDSELGERPPEDNQSFQYDHEAFLGK_16_HexNAc(3)Hex(3)Fuc(1)	27259	Q15293	VVRPDSELGERPPEDNQSFQYDHEAFLGK	N16GlcNAc	5	N3H3F1S0	17	N,0;	0	53	16	1.12839	42.74	19.35	921.418	C195H299N44O84	1	138.35	12_Tetis_human_8ug_TR3_231109_f	25AI3,BI4,02AI2,15AI4,BI2,CI2,ZI1,ZI5,YI1,YI2,YI3,YI4,ZI1,YI1,YI2,YI4,YI1,	921.418	4601.05	921.417	1	39.66	01Y41Y41M(31M)61M61Y31F	282.89	15	26.79
P51884_KLHINHNNLTESVGPLPK_8_HexNAc(5)Hex(6)Fuc(1)NeuAc(2)	21296	P51884	KLHINHNNLTESVGPLPK	N8GlcNAc	4	N5H6F1S2	0	N,1;	1	127	8	1.18785	33.6	21.62	1183.28	C193H317N34O101	2	98.66	15_bigintes_human_15ug_TR1_240616_f		1183.03	4727.07	1183.03	1	0.63	01Y41Y41M(31M41Y(31F)41L)61M(21Y41L32S)61Y41L32S	282.82	20	52.94
P11047_NISQDLEK_1_HexNAc(4)Hex(3)Fuc(1)	17407	P11047	NISQDLEK	N1GlcNAc	2	N4H3F1S0	4	N,4;	4	1241	1	1.33071	39.73	11.4	1196.52	C95H160N15O55	1	85.64	10_Fat_human_15ug_TR3_231011_f	CI2,YI3,ZI3,YI3,	1196.52	2391.02	1196.51	1	4.77	01Y41Y41M(31M)61M(21Y31F)61Y	282.81	21	121.43
P12111_QLINALQINNTAVGHALVLPAGR_9_HexNAc(4)Hex(5)Fuc(1)NeuAc(2)	35664	P12111	QLINALQINNTAVGHALVLPAGR	N9GlcNAc	3	N4H5F1S2	1	N,2;	2	2558	9	2.65131	39.76	21.66	1579.74	C195H326N39O95	1	168.32	17_Prostate_human_15ug_TR1_240619_f	YII3,	1579.41	4734.19	1579.4	2	4.89	01Y41Y41M(31M21Y(31F)41L32S)61M61Y41L32S	282.67	28	61.36
P02750_MFSQNDTR_5_HexNAc(2)Hex(9)	10754	P02750	MFSQNDTR	N5GlcNAc	2	N2H9F0S0	0	N,3;	3	325	5	0.57788	83.18	33.6	1432.54	C110H180N15O70S1	2	50.06	02_RE_Liver_human_15ug_TR2_240613_f		1432.54	2863.07	1432.54	2	0	01Y41Y41M(31M21M21M31G31G)61M(31M)61M	282.45	16	92.86
Q13510_ILAPAYFILGGNQSGEGCVITR_12_HexNAc(2)Hex(3)	38032	Q13510	ILAPAYFILGGNQSGEGCVITR	N12GlcNAcC18Cam	3	N2H3F0S0	11	N,7;	7	286	12	2.43291	28.19	13.08	1077.85	C138H223N30O56S1	1	183.31	10_Fat_human_15ug_TR2_231011_f	03AI2,BI1,BII1,BI2,03AI2,CI2,34AI3,BI3,02XI1,ZI1,YI1,YI2,	1077.18	3228.52	1077.18	1	0	01Y41Y41M(31M)61M	282.44	31	73.81
P0DP01_NTSISTAYMELSSLR_1_HexNAc(2)Hex(7)	17455	P0DP01	NTSISTAYMELSSLR	N1GlcNAc	3	N2H7F0S0	4	N,3;	3	92	1	-5.31336	34.28	12.52	1072.45	C128H214N21O71S1	1	83.54	02_RE_Liver_human_15ug_TR3_240613_f	BI2,BIII3,BI2,BIII3,YI3,YIII3,YI3,YIII3,	1072.12	3213.35	1072.12	1	2.53	01Y41Y41M(31M21M21M)61M(31M)61M	282.44	6	17.86
Q5T3J3_VTSVGTGNFSSSVSKVQSHGVK_8_HexNAc(3)Hex(5)	24921	Q5T3J3	VTSVGTGNFSSSVSKVQSHGVK	N8GlcNAc	3	N3H5F0S0	0	N,1;	1	127	8	4.02518	25.62	10.56	1204.89	C147H244N31O73	1	120.39	16_Pancreas_human_15ug_TR2_240614_f		1204.89	3611.63	1204.88	1	17.59	01Y41Y41M(31M)(41Y)61M31M21M	282.4	9	19.05
Q9HC10_NEMLEIQVFNYSK_10_HexNAc(2)Hex(5)	24856	Q9HC10	NEMLEIQVFNYSK	N10GlcNAc	3	N2H5F0S0	19	N,1;	1	68	10	2.94871	36.26	13.44	944.745	C118H188N19O58S1	1	118.03	04_Stomach_human_15ug_TR3_240614_f	BI1,BII1,BIII1,BI2,04AI2,02AI2,04AI3,02AI4,25AI2,YI1,YI2,YI3,ZI1,YI1,ZI2,YI2,YI3,02XI1,ZI1,YI1,YI2,	944.744	2831.21	944.742	1	0	01Y41Y41M(31M)61M(31M)61M	282.37	8	25
P08575_NGSAAMCHFTTK_1_HexNAc(2)Hex(5)	16652	P08575	NGSAAMCHFTTK	N1GlcNAcC7Cam	3	N2H5F0S0	16	N,3;	3	470	1	0.110443	22.71	11.54	847.672	C100H162N19O53S2	1	84.86	11_Spleen_human_15ug_TR2_231108_f	BI1,BII1,BIII1,BI2,03AI2,CI2,YI2,14XI1,02XI1,03XI1,ZI1,YI1,YI2,YI3,YI4,YII4,YIII3,02XI1,ZI1,YI1,	848.006	2541	848.006	1	0	01Y41Y41M(31M)61M(31M)61M	282.17	24	100
Q9UQ16_QVETIRNLVDSYMSIINK_17_HexNAc(2)Hex(8)	34825	Q9UQ16	QVETIRNLVDSYMSIINK	N17GlcNAc	3	N2H8F0S0	2	N,2;	2	674	17	-4.35785	38.18	13.43	1276.57	C156H262N27O80S1	2	167.75	18_adg_human_15ug_TR1_240615_f	12AIII4,12AIII4,	1276.57	3825.7	1276.57	2	0	01Y41Y41M(31M21M21M31G)61M(31M)61M	282.1	11	29.41
Q9NQ38_SNGTGSESGKDTCDEFR_2_HexNAc(4)Hex(3)Fuc(1)	13414	Q9NQ38	SNGTGSESGKDTCDEFR	N2GlcNAcC13Cam	3	N4H3F1S0	0	N,2;	2	763	2	0.976096	56.65	24.06	1098.1	C127H204N27O72S1	1	61.89	20_Oesophagus_human_15ug_TR2_240618_f		1098.1	3291.29	1098.1	1	9.95	01Y41Y41M(31M41Y31F)61M61Y	281.88	22	62.5
Q07954_DNTTCYEFK_2_HexNAc(2)Hex(5)	16127	Q07954	DNTTCYEFK	N2GlcNAcC5Cam	2	N2H5F0S0	15	N,4;	4	1575	2	-0.835204	45.99	13.57	1197.96	C96H149N14O54S1	1	81.93	human_brain_14ug_TR3_0703_f	BI1,BII1,BIII1,CI3,02AI4,BI2,04AI3,ZI1,YI2,35AI4,YI3,BI4,02XI1,ZI1,YI1,YI2,YI3,	1197.96	2393.91	1197.96	1	0	01Y41Y41M(31M)61M(31M)61M	281.71	23	125
Q06828_LYLDHNNLTR_7_HexNAc(4)Hex(5)Fuc(1)NeuAc(1)	18863	Q06828	LYLDHNNLTR	N7GlcNAc	3	N4H5F1S1	0	N,8;	8	166	7	0.791908	40.66	23.05	1107.14	C134H217N22O74	1	89.33	19_Ovarian_human_15ug_TR3_240617_f		1107.14	3318.39	1107.14	1	6.42	01Y(61F)41Y41M(31M)61M(21Y41L32S)61Y41L	281.7	17	83.33
Q6RSH7_IIICNHSPR_5_HexNAc(2)Hex(4)	23025	Q6RSH7	IIICNHSPR	C4CamN5GlcNAc	2	N2H4F0S0	19	N,1;	1	60	5	3.02963	62.5	11.54	1082.99	C87H147N18O43S1	1	109.9	18_adg_human_15ug_TR3_240615_f	BI1,BII1,BII2,BII2,BI2,ZI1,YI1,02XI2,YI2,BI3,YII3,YI3,YII4,MH,02XI1,ZI1,YI1,ZI2,YI2,YII3,YI3,YII4,	1082.99	2163.96	1082.98	1	0	01Y41Y41M(31M21M)61M	281.68	7	31.25
A0A1W2PQ72_LGVSGEPSPCTSTNR_14_HexNAc(2)Hex(7)	14791	A0A1W2PQ72	LGVSGEPSPCTSTNR	C10CamN14GlcNAc	3	N2H7F0S0	3	N,1;	1	231	14	3.17618	45.16	18.89	1035.09	C120H201N22O70S1	1	70.18	02_RE_Liver_human_15ug_TR3_240613_f	YI3,ZI3,YI3,	1035.09	3102.26	1035.09	1	17.42	01Y41Y41M(31M)61M(31M21M)61M21M	281.43	7	17.86
Q7Z7G0_VHINTTSDSILLK_4_HexNAc(4)Hex(5)NeuAc(1)	25236	Q7Z7G0	VHINTTSDSILLK	N4GlcNAc	3	N4H5F0S1	2	N,5;	5	37	4	0.846004	42.73	16.92	1119.17	C136H229N22O74	1	118.77	21_Bladder_human_15ug_TR3_240619_f	YI3,YI3,	1119.17	3354.48	1119.17	2	4.22	01Y41Y41M(31M)61M(21Y41L32S)61Y41L	281.39	24	91.67
O43427_NLSRGLVNVAAK_1_HexNAc(3)Hex(5)	25295	O43427	NLSRGLVNVAAK	N1GlcNAc	2	N3H5F0S0	0	N,3;	3	281	1	-4.28242	44.29	11.82	1331.62	C107H186N21O56	1	120.91	18_adg_human_15ug_TR2_240615_f		1331.62	2661.24	1331.62	1	4.95	01Y41Y41M(31M)(41Y)61M31M21M	281.18	8	27.27
Q9H4A3_SSRSSSLGNK_9_HexNAc(5)Hex(5)NeuAc(1)	20676	Q9H4A3	SSRSSSLGNK	N9GlcNAc	3	N5H5F0S1	0	N,1;	1	2143	9	8.22975	52.51	19.6	1047.11	C120H204N21O75	1	96.39	21_Bladder_human_15ug_TR3_240619_f		1047.44	3139.28	1047.43	1	21.41	01Y41Y41M(31M41Y)61M61Y41L31Y41L32S	280.97	7	27.78
P11047_VNDNKTAAEEALR_4_HexNAc(4)Hex(5)Fuc(1)	16907	P11047	VNDNKTAAEEALR	N4GlcNAc	3	N4H5F1S0	0	N,2;	2	1380	4	1.97523	42.71	25.29	1067.46	C126H212N23O72	1	85.67	13_Heart_human_10ug_TR3_231111_f		1067.46	3199.36	1067.46	2	2.85	01Y41Y41M(31M41Y(31F)41L)61M61Y41L	280.9	22	75
P13473_VQPFNVTQGK_5_HexNAc(2)Hex(7)	19928	P13473	VQPFNVTQGK	N5GlcNAc	2	N2H7F0S0	3	N,6;	6	356	5	1.98764	48.4	18	1330.07	C108H177N16O60	1	102.15	12_Tetis_human_8ug_TR3_231109_f	BI2,YI3,YI3,	1330.07	2658.13	1330.07	1	14.31	01Y41Y41M(31M21M)61M(31M21M)61M	280.75	21	105.56
[truncated: 7,445 more rows]

## Sheet: Supplementary Table S4
Search results of Glyco-Decipher.
[truncated: 7,938 more rows]

## Sheet: Supplementary Table S5
Search results of pGlyco3.
[truncated: 8,362 more rows]

## Sheet:  Supplementary Table S6
Search results of Fragpipe.
[truncated: 8,667 more rows]
[truncated: 13 more columns]
